# Supplementary material
Source: PubMed Central journal article supplement (PMC4175444)

# Supplementary Materials

## Direct Stereospecific Synthesis of Unprotected N-H/N-Me Aziridines from Olefins

*Jawahar L. Jat*<sup>1</sup>, *Mahesh P. Paudyal*<sup>1</sup>, *Hongyin Gao*<sup>1</sup>, *Qing-Long Xu*<sup>1</sup>, *Muhammed Yousufuddin*<sup>2</sup>,  
*Deepa Devararajan*<sup>3</sup>, *Daniel H. Ess*<sup>\*3</sup>, *László Kürti*<sup>\*1</sup> and *J. R. Falck*<sup>\*1</sup>

## TABLE OF CONTENTS

|                                                                                  |                 |
|----------------------------------------------------------------------------------|-----------------|
| General Methods and Materials .....                                              | SI-2            |
| Catalyst Screening Results: <b>Tables S1, S2 &amp; S3</b> .....                  | SI-3 – SI-5     |
| Stereospecificity Studies: <b>Figures S1a - S1f</b> .....                        | SI-6 – SI-11    |
| Epoxy-Olefin N-H Aziridination Study: <b>Figures S2a &amp; S2b</b> .....         | SI-12 – SI-13   |
| Search for Allylic C-H Amination Side Product(s): <b>Figures S3a – S3c</b> ..... | SI-14 – SI-16   |
| Chiral Induction Studies: <b>Figures S4a &amp; S4b</b> .....                     | SI-17 – SI-18   |
| General Amino-oxyarylation Procedure .....                                       | SI-19           |
| General N-H/N-Me Aziridination Procedure .....                                   | SI-21           |
| Preparation and Analytical Data of Products .....                                | SI-19 – SI-46   |
| X-Ray Diffraction Data for Compound <b>10ss</b> .....                            | SI-46 – SI-61   |
| <b>Tables S4 – S6</b> .....                                                      | SI-47 – SI-58   |
| <b>Tables S7 – S8</b> .....                                                      | SI-59 – SI-61   |
| Computational Details .....                                                      | SI-61 – SI-63   |
| Calculated Catalytic Cycles: <b>Figure S5</b> .....                              | SI-62           |
| XYZ Coordinates and Thermochemical Data (Energies in Hartree) .....              | SI-64 – SI-101  |
| Copies of <sup>1</sup> H- and <sup>13</sup> C-NMR Spectra .....                  | SI-102 – SI-213 |

## Direct Stereospecific Synthesis of Unprotected N-H/N-Me Aziridines from Olefins

Jawahar L. Jat<sup>1</sup>, Mahesh P. Paudyal<sup>1</sup>, Hongyin Gao<sup>1</sup>, Qing-Long Xu<sup>1</sup>, Muhammed Yousufuddin<sup>2</sup>,  
Deepa Devararajan<sup>3</sup>, Daniel H. Ess<sup>\*3</sup>, László Kürti<sup>\*1</sup> and J. R. Falck<sup>\*1</sup>

<sup>1</sup>Division of Chemistry, Department of Biochemistry, UT Southwestern, Dallas, TX 75390;

<sup>2</sup>Center for Nanostructured Materials, The University of Texas at Arlington, TX 76019;

<sup>3</sup>Department of Chemistry and Biochemistry, Brigham Young University, Provo, UT 84602

### Supplementary Materials

#### General Methods and Materials

Proton and carbon nuclear magnetic resonance spectra (<sup>1</sup>H and <sup>13</sup>C NMR) were recorded on a Varian 500 at 500 MHz and 126 MHz, respectively, or a Varian 400 at 400 MHz and 101 MHz, respectively, in CDCl<sub>3</sub> with TMS as internal standard, unless otherwise stated. <sup>1</sup>H NMR data are reported as follows: chemical shift (ppm), multiplicity (s = singlet, br s = broad singlet, d = doublet, t = triplet, q = quartet, app q = apparent quartet, qn = quintet, app qn = apparent quintet, m = multiplet) and coupling constant (Hz). High resolution mass spectra (HRMS) were obtained using a Shimadzu IT-TOF mass spectrometer at UT Arlington. Infrared (IR) spectra were obtained using a Perkin Elmer Spectrum 1000 Fourier transform infrared spectrometer. Melting points were measured using an OptiMelt from Stanford Research Systems and are uncorrected. Analytical thin layer chromatography (TLC) used EMD Chemicals TLC silica gel 60 F<sub>254</sub> plates (0.040-0.063 mm) with visualization by UV light and/or KMnO<sub>4</sub> or phosphomolybdic acid (PMA) solution followed by heating. Chromatographic purifications utilized Et<sub>3</sub>N basified preparative TLC or flash chromatography using pre-packed SiO<sub>2</sub> columns on a CombiFlash Rf200 chromatograph (Teledyne Isco). Unless otherwise noted, yields refer to isolated, purified material with spectral data consistent with assigned structures or, if known, were in agreement with published data. All reactions were conducted under an argon atmosphere in oven-dried glassware with magnetic stirring. Reagents were purchased at the highest commercial quality and used without further purification, unless otherwise noted. Anhydrous acetonitrile and 2,2,2-trifluoroethanol (Aldrich Chem. Co.) were used directly. Tetrahydrofuran (THF) was dried on a Glass Contours Solvent System by passage through a column of activated, neutral alumina under argon before use. Amination reagents were obtained from Corvinus Chemicals and Rh catalysts from Sigma-Aldrich Chem. Co. and Strem Chemicals.

**Table S1: Catalyst Screening**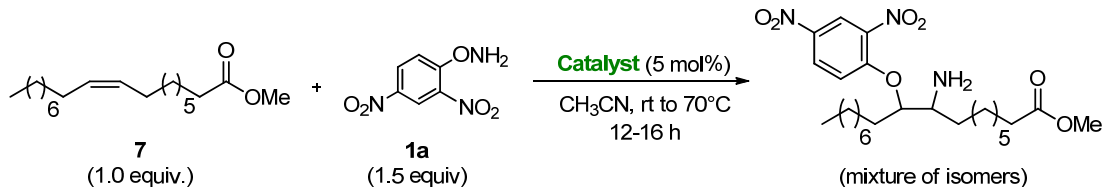

| Entry | Catalyst                                                                     | Result <sup>a</sup>               |
|-------|------------------------------------------------------------------------------|-----------------------------------|
| 1     | Cu(CH <sub>3</sub> CN) <sub>4</sub> PF <sub>6</sub>                          | No reaction, <b>1a</b> decomposed |
| 2     | FeCl <sub>3</sub>                                                            | No reaction, <b>1a</b> decomposed |
| 3     | Fe(II)OTf                                                                    | No reaction, <b>1a</b> decomposed |
| 4     | Mn(II)OTf                                                                    | No reaction, <b>1a</b> decomposed |
| 5     | (C <sub>5</sub> H <sub>5</sub> )(CO) <sub>2</sub> (THF)Fe(II)BF <sub>4</sub> | No reaction, <b>1a</b> decomposed |
| 6     | Pd(OAc) <sub>2</sub>                                                         | No reaction, <b>1a</b> decomposed |
| 7     | Rh <sub>2</sub> (OAc) <sub>4</sub>                                           | 15% isolated product              |

<sup>a</sup>Determined by NMR analysis of the crude reaction mixture.

**Table S2: Catalyst Screening**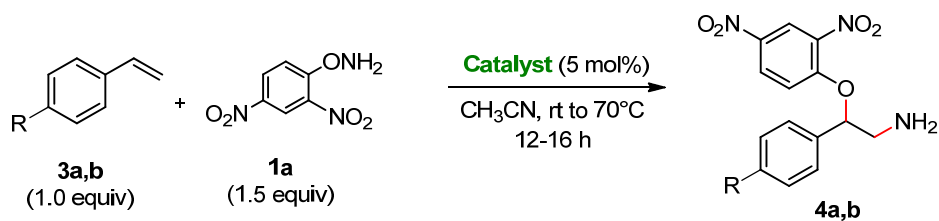

| Entry | Substrate | Catalyst                                            | Result <sup>a</sup>               |
|-------|-----------|-----------------------------------------------------|-----------------------------------|
| 1     | <b>3a</b> | CuI                                                 | No reaction, <b>1a</b> decomposed |
| 2     | <b>3a</b> | CuBr                                                | No reaction, <b>1a</b> decomposed |
| 3     | <b>3a</b> | Cu(BF <sub>4</sub> ) <sub>2</sub> ·H <sub>2</sub> O | No reaction, <b>1a</b> decomposed |
| 4.    | <b>3a</b> | Cu(acac) <sub>2</sub>                               | No reaction, <b>1a</b> decomposed |
| 5.    | <b>3a</b> | CuOTf                                               | <10% of <b>4a</b>                 |

|    |    |                                                                                             |                                   |
|----|----|---------------------------------------------------------------------------------------------|-----------------------------------|
| 6. | 3a | Rh <sub>2</sub> (OAc) <sub>4</sub>                                                          | 25% product isolated              |
| 7. | 3a | Rh <sub>2</sub> (TFA) <sub>4</sub>                                                          | No reaction, <b>1a</b> decomposed |
| 8. | 3a | Rh <sub>2</sub> (Hfb) <sub>4</sub>                                                          | No reaction, <b>1a</b> decomposed |
| 9  | 3a | Rh <sub>2</sub> (TPA) <sub>4</sub>                                                          | No reaction, <b>1a</b> decomposed |
| 10 | 3a | Hydroxy(COD)Rh(I)dimer                                                                      | No reaction, <b>1a</b> decomposed |
| 11 | 3a | Chloro(COD)Rh(I)dimer                                                                       | No reaction, <b>1a</b> decomposed |
| 12 | 3a | Cl(CO)(Ph <sub>3</sub> P) <sub>2</sub> Rh(I)                                                | No reaction, <b>1a</b> decomposed |
| 13 | 3a | Cl(Ph <sub>3</sub> P) <sub>3</sub> Rh(I)                                                    | No reaction, <b>1a</b> decomposed |
| 14 | 3a | (CO) <sub>2</sub> (acac) <sub>2</sub> Rh(I)                                                 | No reaction, <b>1a</b> decomposed |
| 15 | 3a | (Ph <sub>3</sub> P) <sub>3</sub> Rh(I)(CO)(H)                                               | No reaction, <b>1a</b> decomposed |
| 16 | 3a | Rh(III)(acac) <sub>3</sub>                                                                  | No reaction, <b>1a</b> decomposed |
| 17 | 3a | Co <sub>2</sub> (CO) <sub>8</sub>                                                           | No reaction, <b>1a</b> decomposed |
| 18 | 3b | [(Cy <sub>3</sub> P) <sub>3</sub> (COD)(pyridine)Ir(I)]PF <sub>6</sub>                      | No reaction, <b>1a</b> decomposed |
| 19 | 3b | {Chloro(4,4-dicarboxy-2,2-bipyridine)(p-cymene) RuCl}                                       | No reaction, <b>1a</b> decomposed |
| 20 | 3b | (COD) <sub>2</sub> Ni(0)                                                                    | No reaction, <b>1a</b> decomposed |
| 21 | 3b | [(MeO)(COD)Ir(I)] <sub>2</sub>                                                              | No reaction, <b>1a</b> decomposed |
| 22 | 3b | Ir(III)Cl <sub>3</sub>                                                                      | No reaction, <b>1a</b> decomposed |
| 23 | 3b | Cl(Ph <sub>3</sub> P) <sub>3</sub> Au(I)                                                    | No reaction, <b>1a</b> decomposed |
| 24 | 3b | Au(III)Cl <sub>3</sub>                                                                      | No reaction, <b>1a</b> decomposed |
| 25 | 3b | (COD)(Ph <sub>3</sub> P) <sub>2</sub> Rh(I)PF <sub>6</sub> ·CH <sub>2</sub> Cl <sub>2</sub> | No reaction, <b>1a</b> decomposed |
| 26 | 3b | 1,2-Bis[(2S,5S)-2,5-diethylphospholano]benzene(COD) Rh(I)OTf                                | No reaction, <b>1a</b> decomposed |

<sup>a</sup>Determined by NMR analysis of the crude reaction mixture.

**Table S3: Screening of Dirhodium Catalysts**

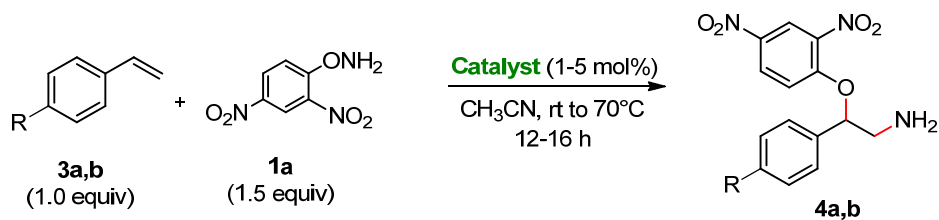

| Entry | Substrate | Catalyst                                   | Results <sup>a</sup> /Isolated Yield |
|-------|-----------|--------------------------------------------|--------------------------------------|
| 1     | 3a        | $\text{Rh}_2(\text{TFA})_4$ (5 mol%)       | No reaction, <b>1a</b> decomposed    |
| 2     | 3a        | $\text{Rh}_2(\text{Hfb})_4$ (5 mol%)       | No reaction, <b>1a</b> decomposed    |
| 3     | 3a        | $\text{Rh}_2(\text{TPA})_4$ (5 mol%)       | No reaction, <b>1a</b> decomposed    |
| 4     | 3a        | $\text{Rh}_2(\text{OAc})_4$ (5 mol%)       | 25% <b>4a</b>                        |
| 5     | 3a        | $\text{Rh}_2(\text{octanoate})_4$ (5 mol%) | 36% <b>4a</b>                        |
| 6     | 3a        | $\text{Rh}_2(\text{esp})_2$ (1 mol%)       | 56% <b>4a</b>                        |
| 7     | 3b        | $\text{Rh}_2(\text{OAc})_4$ (5 mol%)       | 42% <b>4b</b>                        |
| 8     | 3b        | $\text{Rh}_2(\text{esp})_2$ (1 mol%)       | 75% <b>4b</b>                        |

<sup>a</sup>Determined by NMR analysis of the crude reaction mixture.

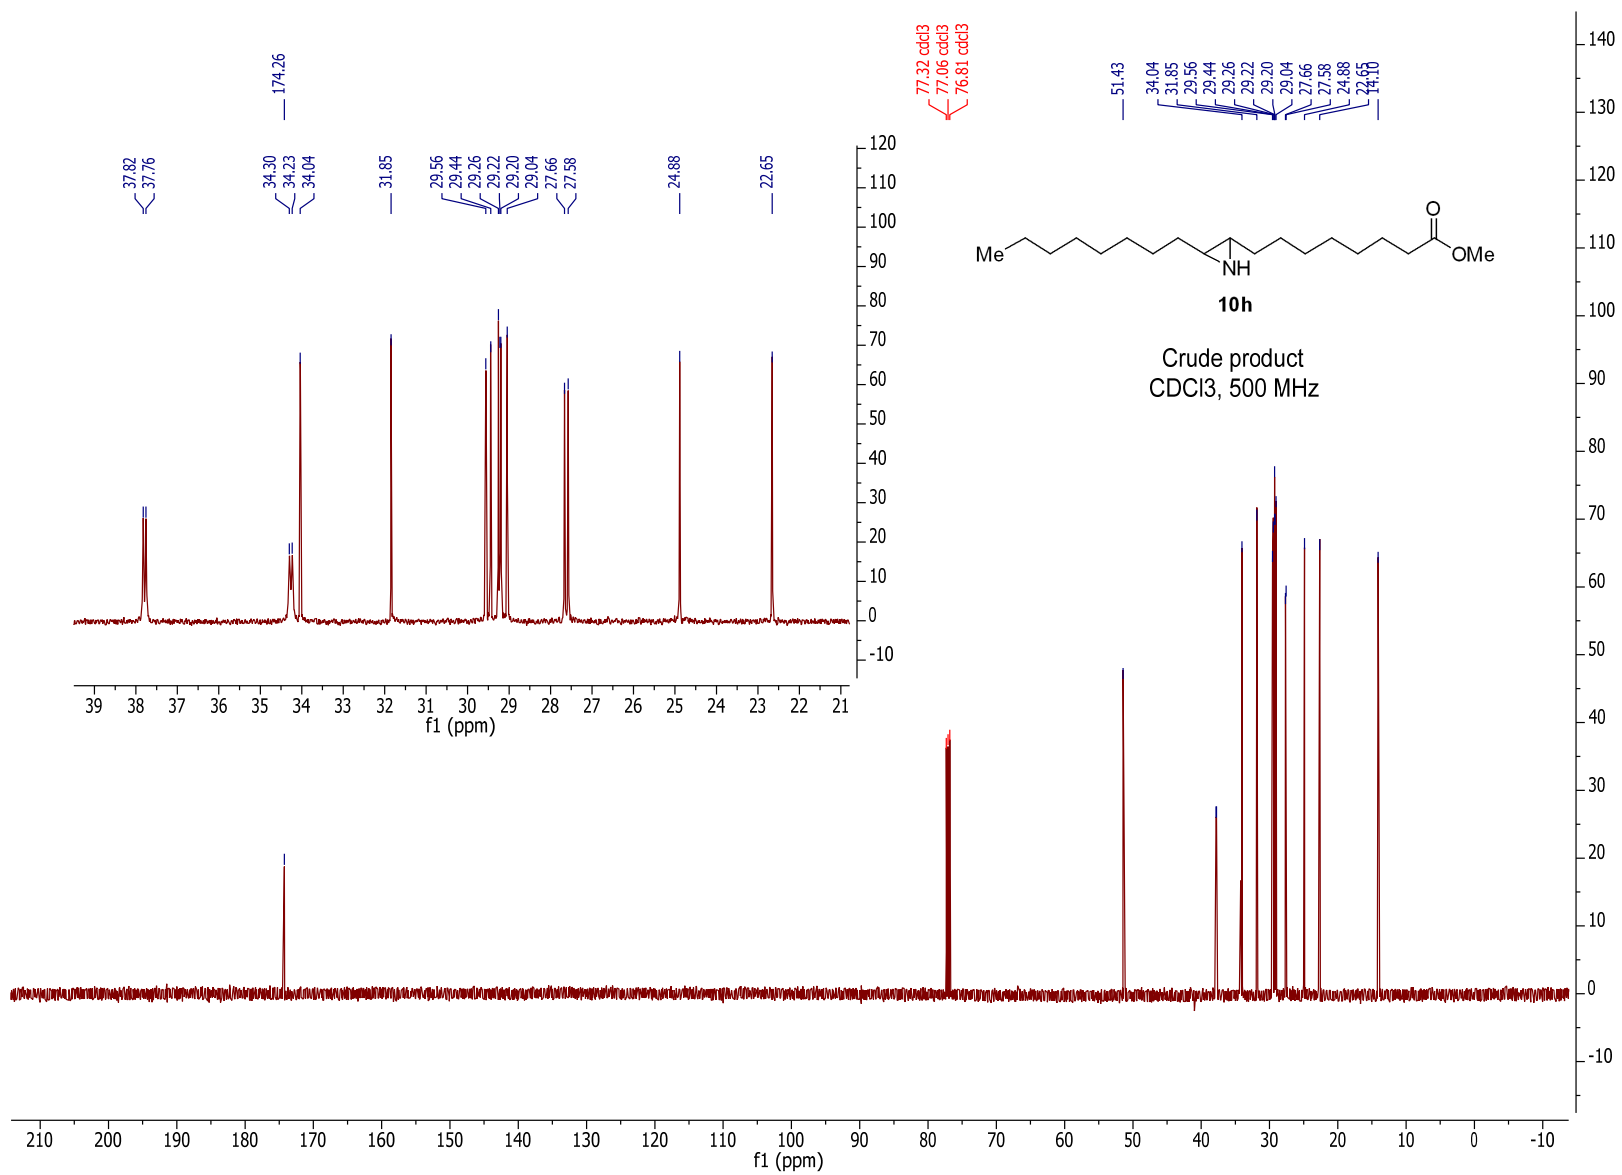

**Figure S1a.** Stereospecificity studies for the direct N-H aziridination of *trans*-Me-elaidate (**9h**) – Crude <sup>13</sup>C-NMR of **10h**.

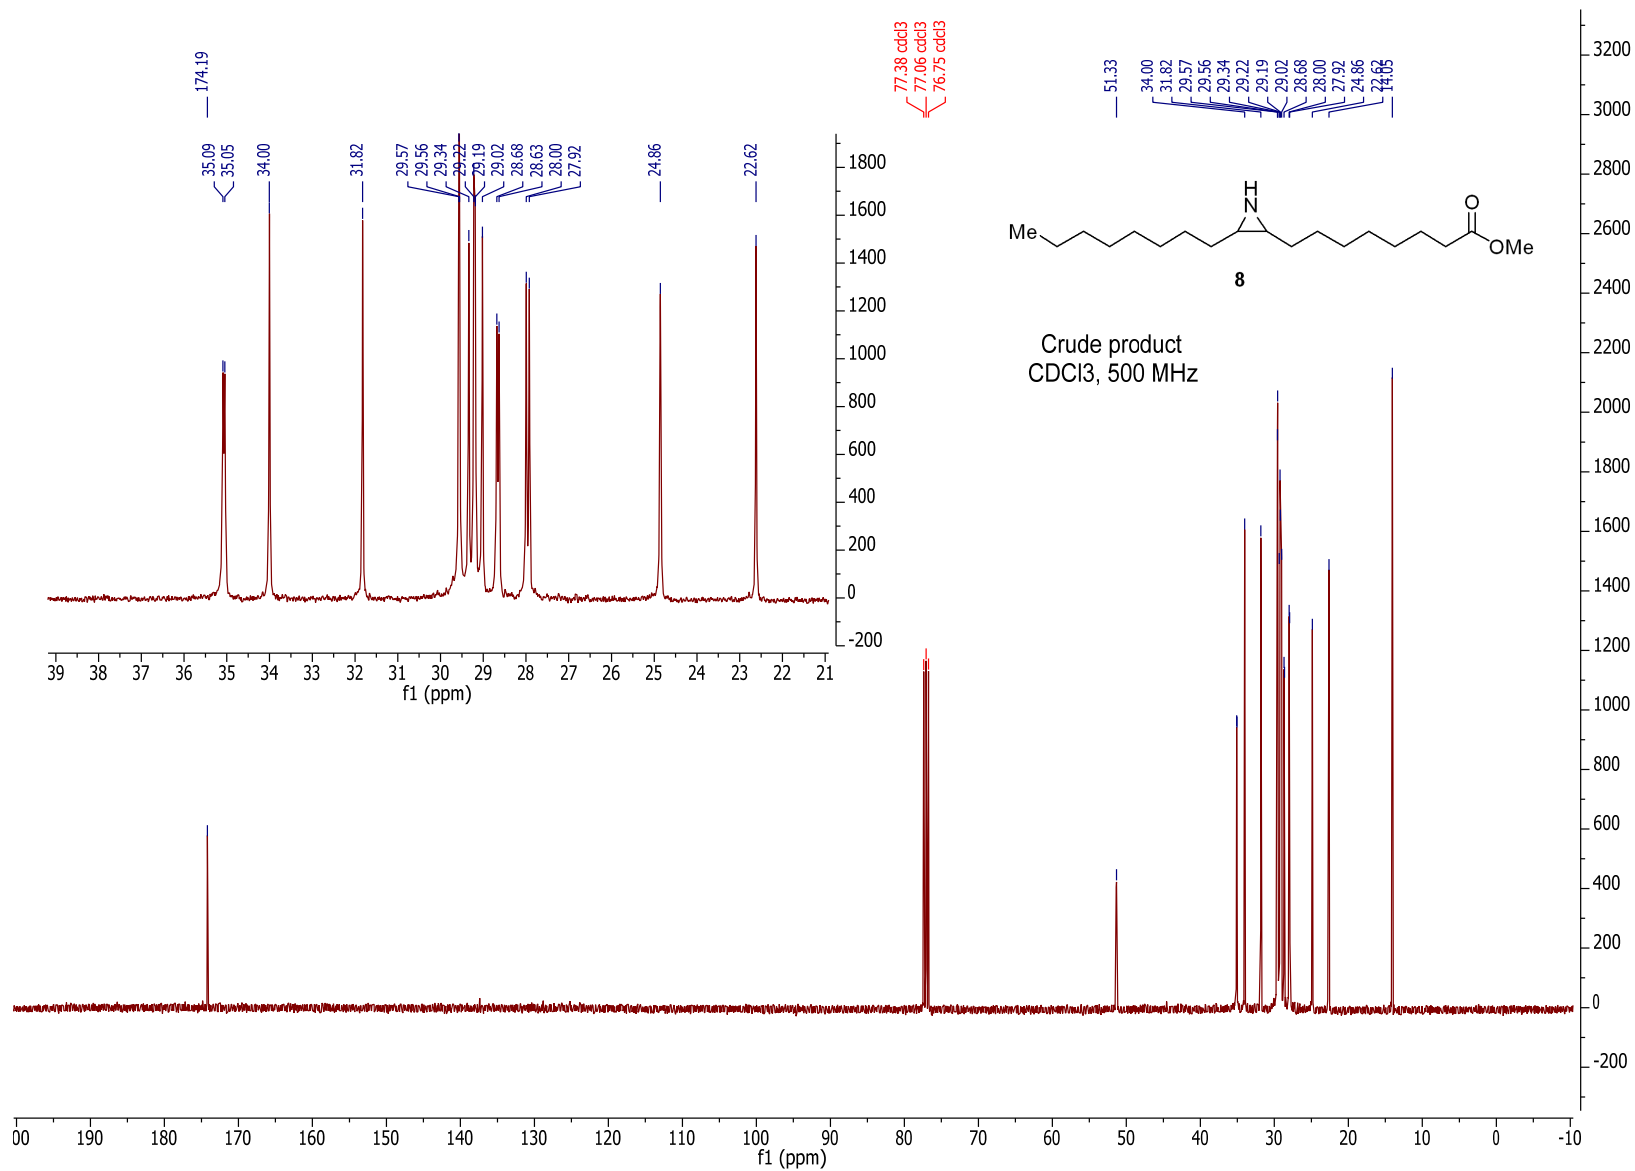

**Figure S1b.** Stereospecificity studies for the direct N-H aziridination of *cis*-Me-oleate (**7**) – Crude <sup>13</sup>C-NMR of **8**.

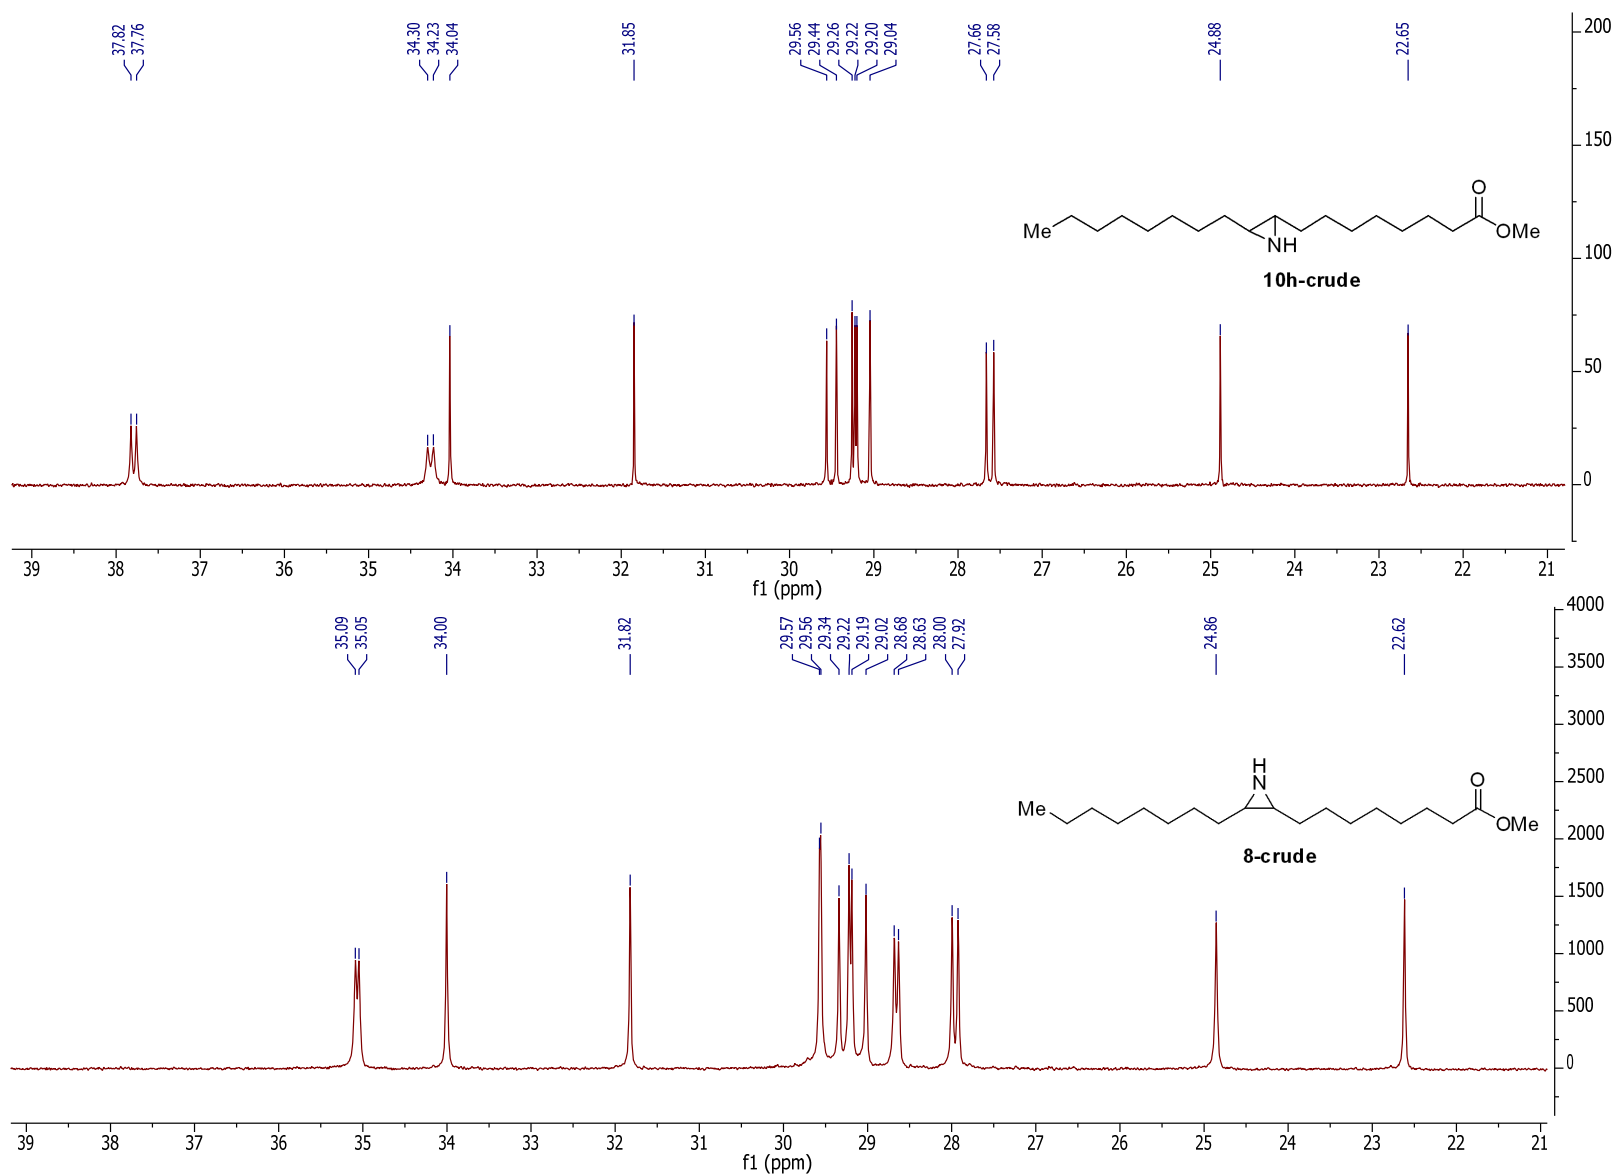

**Figure S1c.** Stereospecificity studies – Stacked crude  $^{13}\text{C}$ -NMR spectra of N-H aziridines **10h** and **8**.



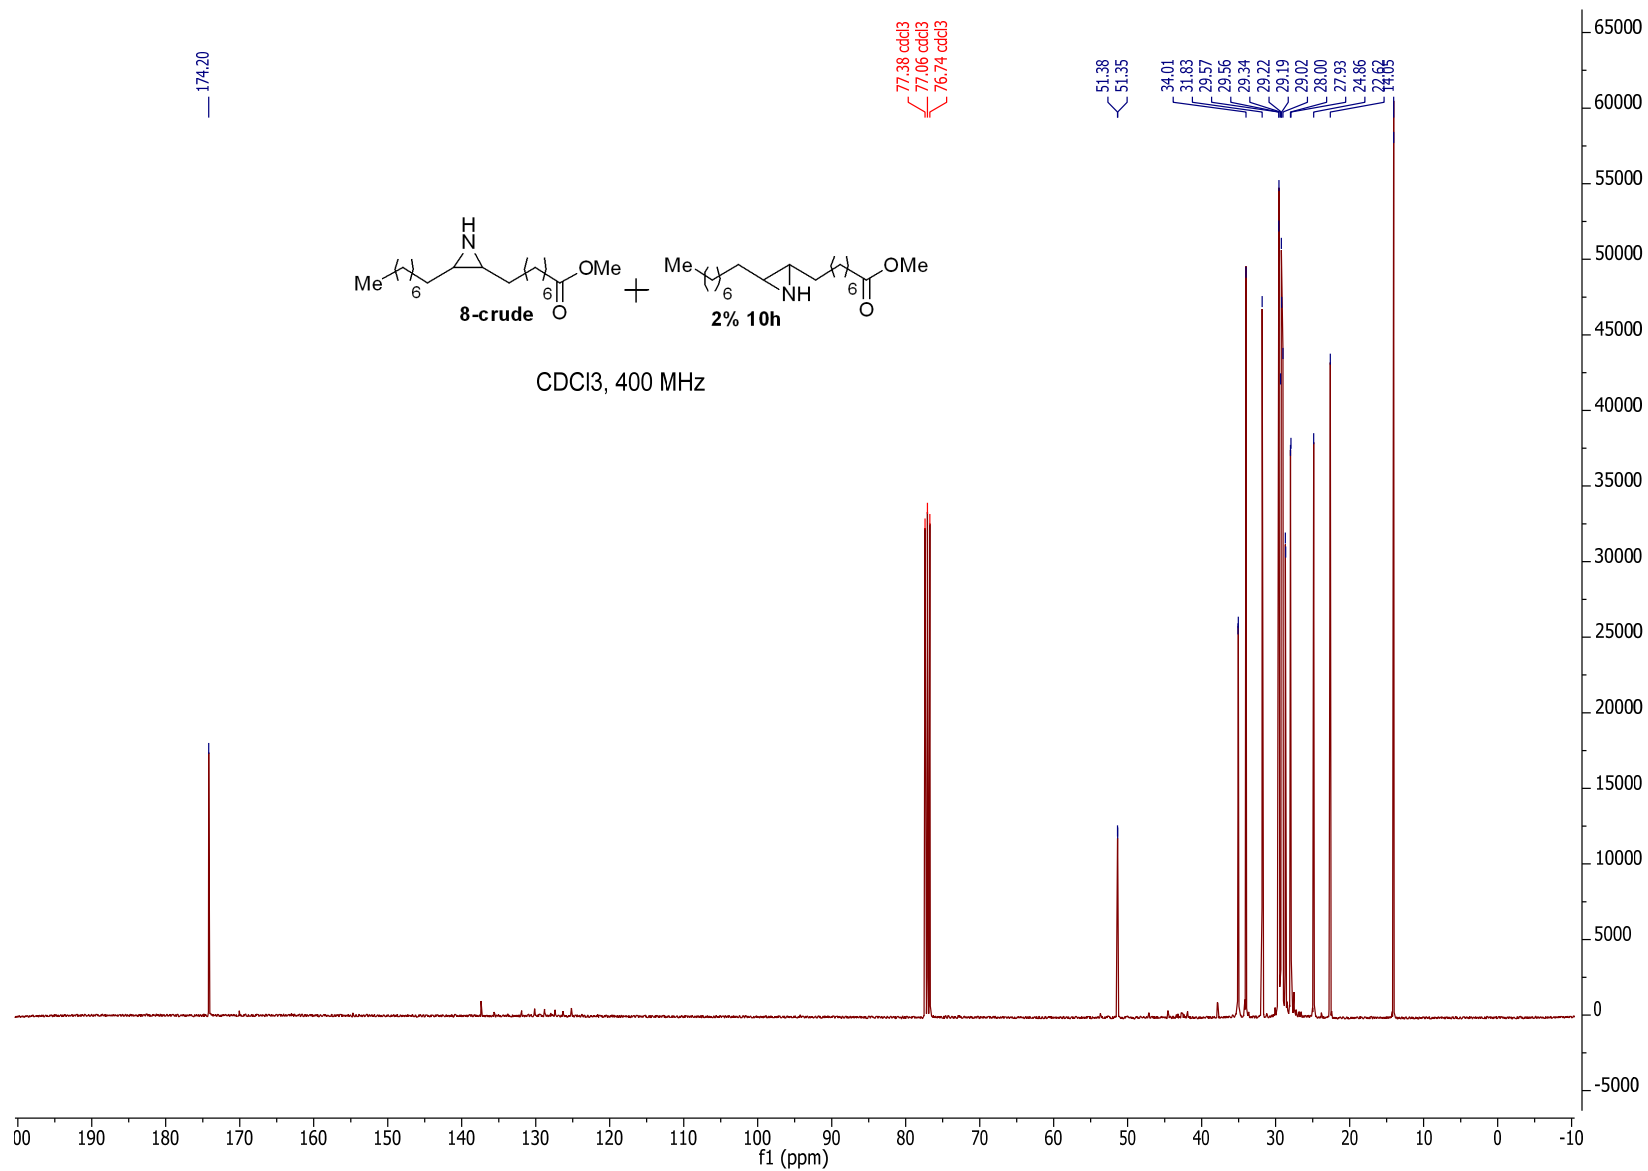

**Figure S1d.** Stereospecificity studies – Crude <sup>13</sup>C-NMR of **8** spiked with 2% of analytically pure **10h**.

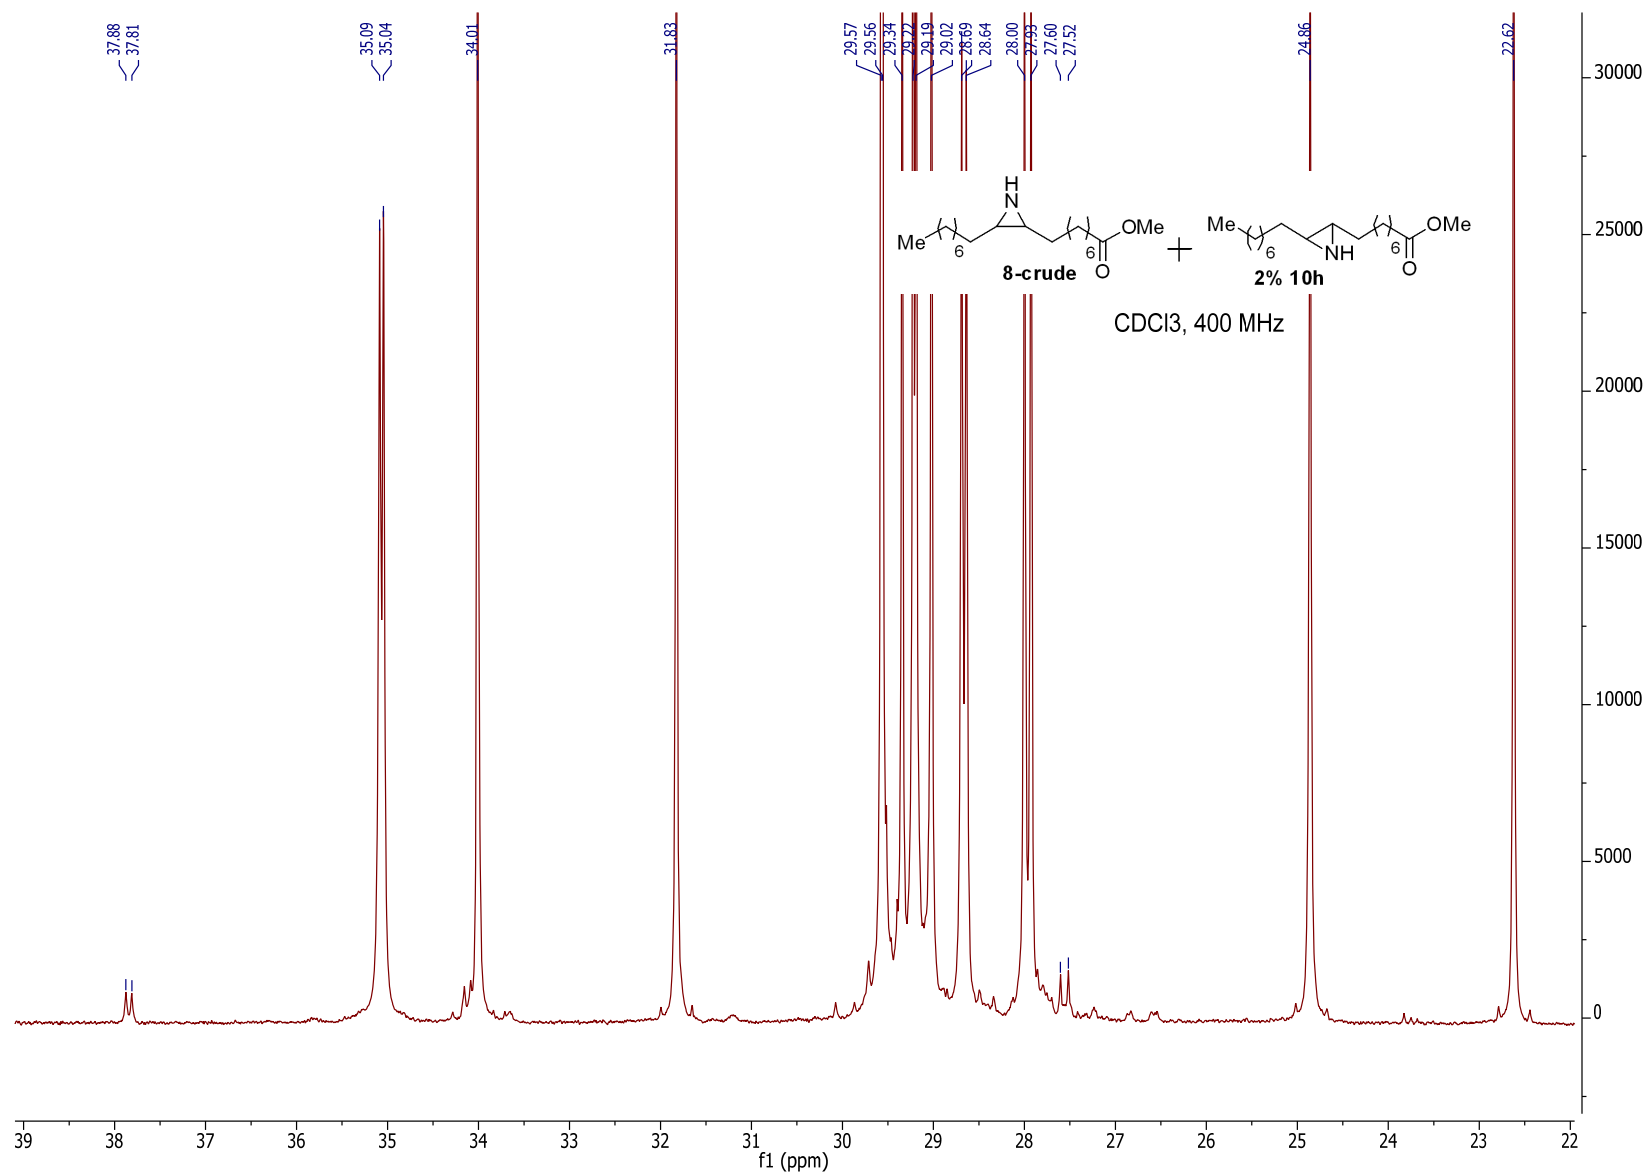

**Figure S1e.** Stereospecificity studies – Expanded crude  $^{13}\text{C}$ -NMR of **8** spiked with 2% of analytically pure **10h**.

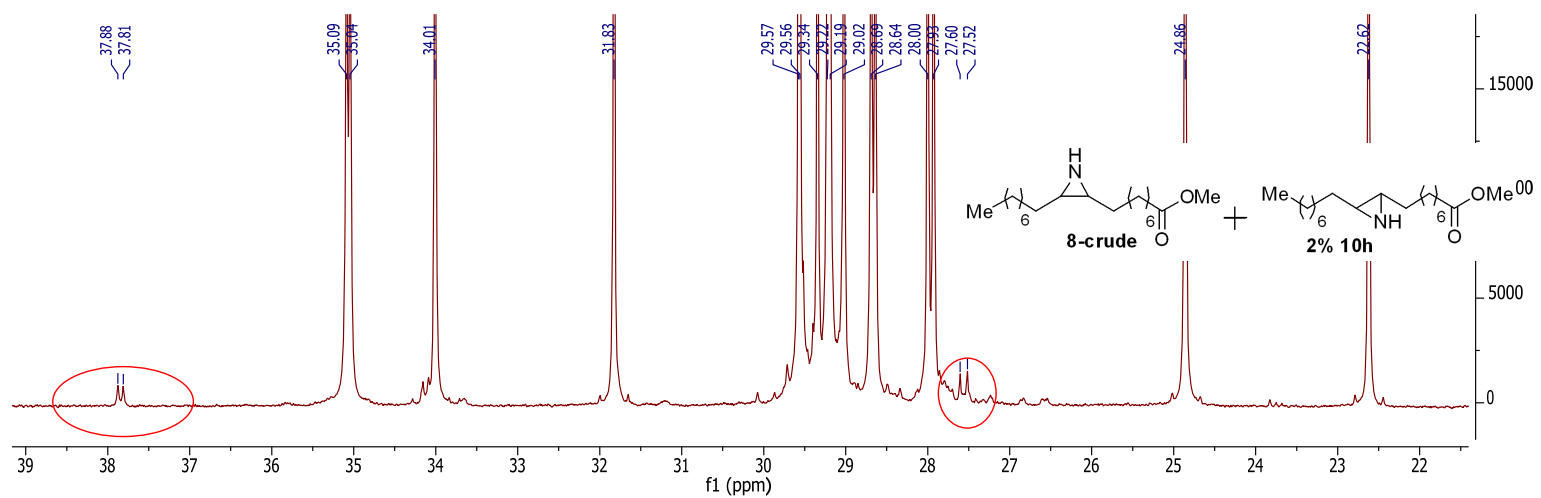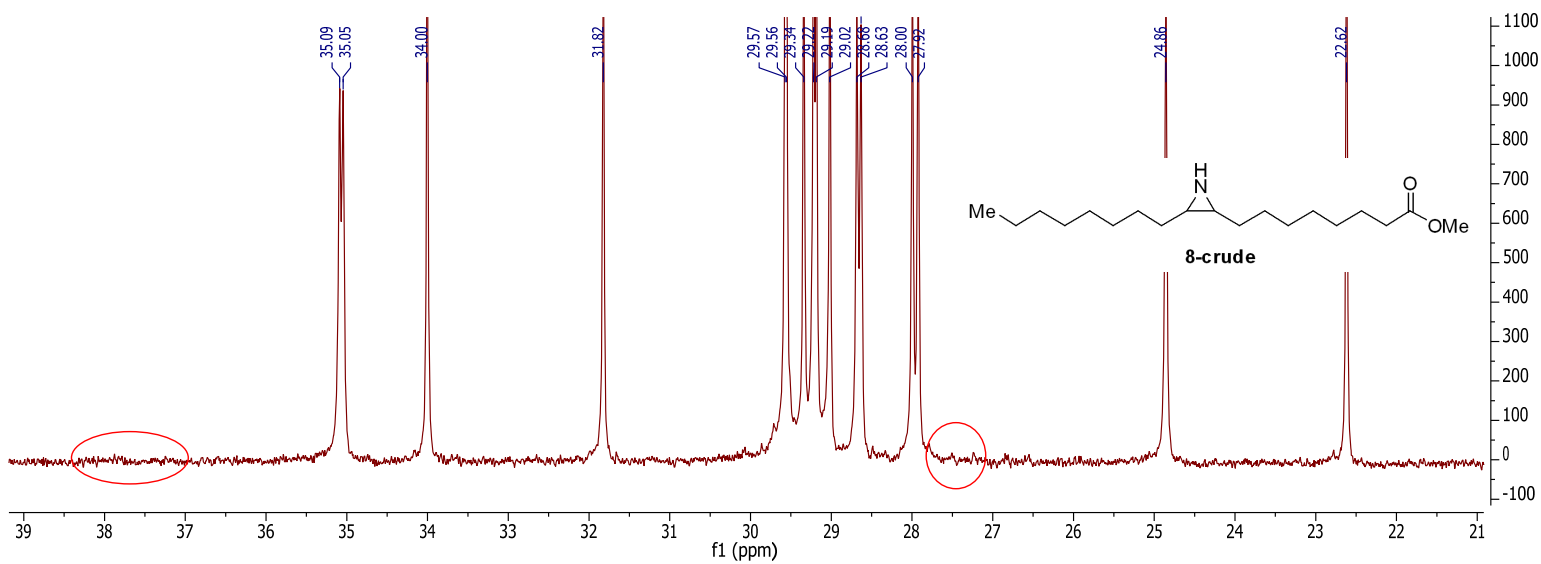

**Figure S1f.** Stereospecificity studies – Stacked crude  $^{13}\text{C}$ -NMR of N-H aziridine **8** spiked with 2% of analytically pure **10h** and crude  $^{13}\text{C}$ -NMR of N-H aziridine **8**.

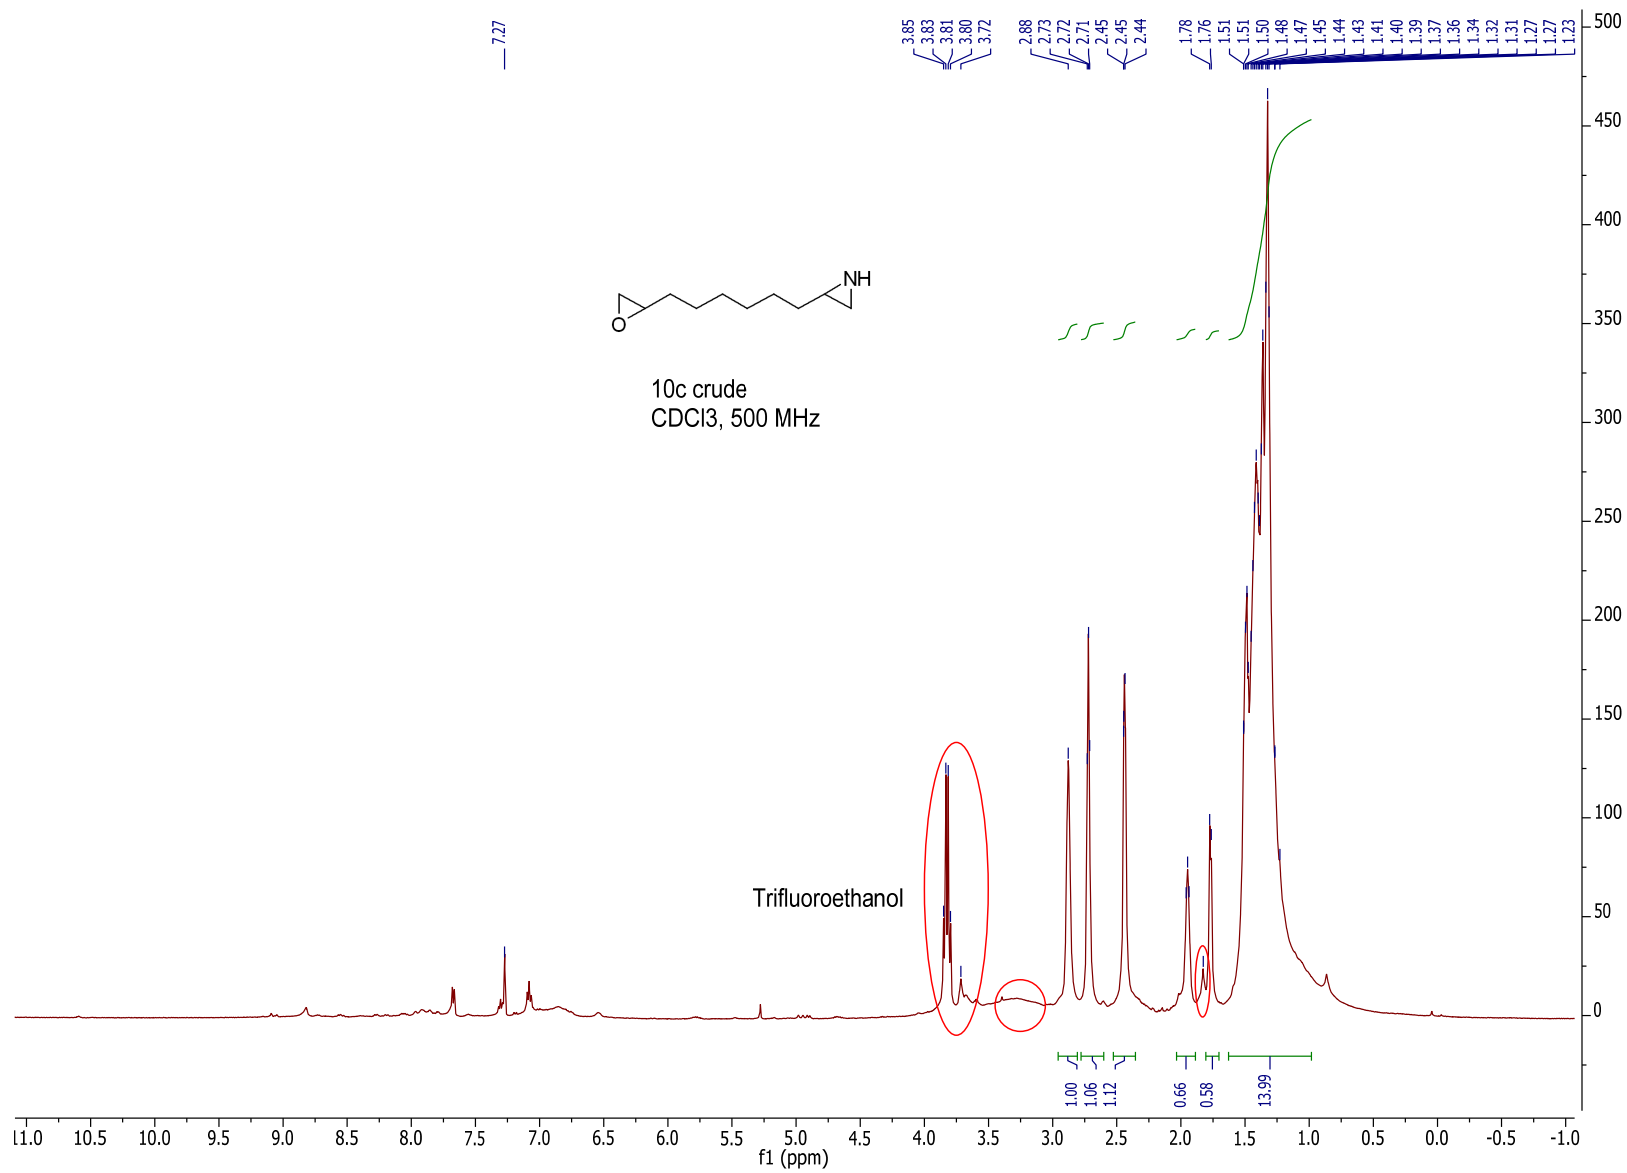

**Figure S2a.** Epoxy-olefin N-H aziridination study – Crude <sup>1</sup>H-NMR of N-H aziridine **10c**.

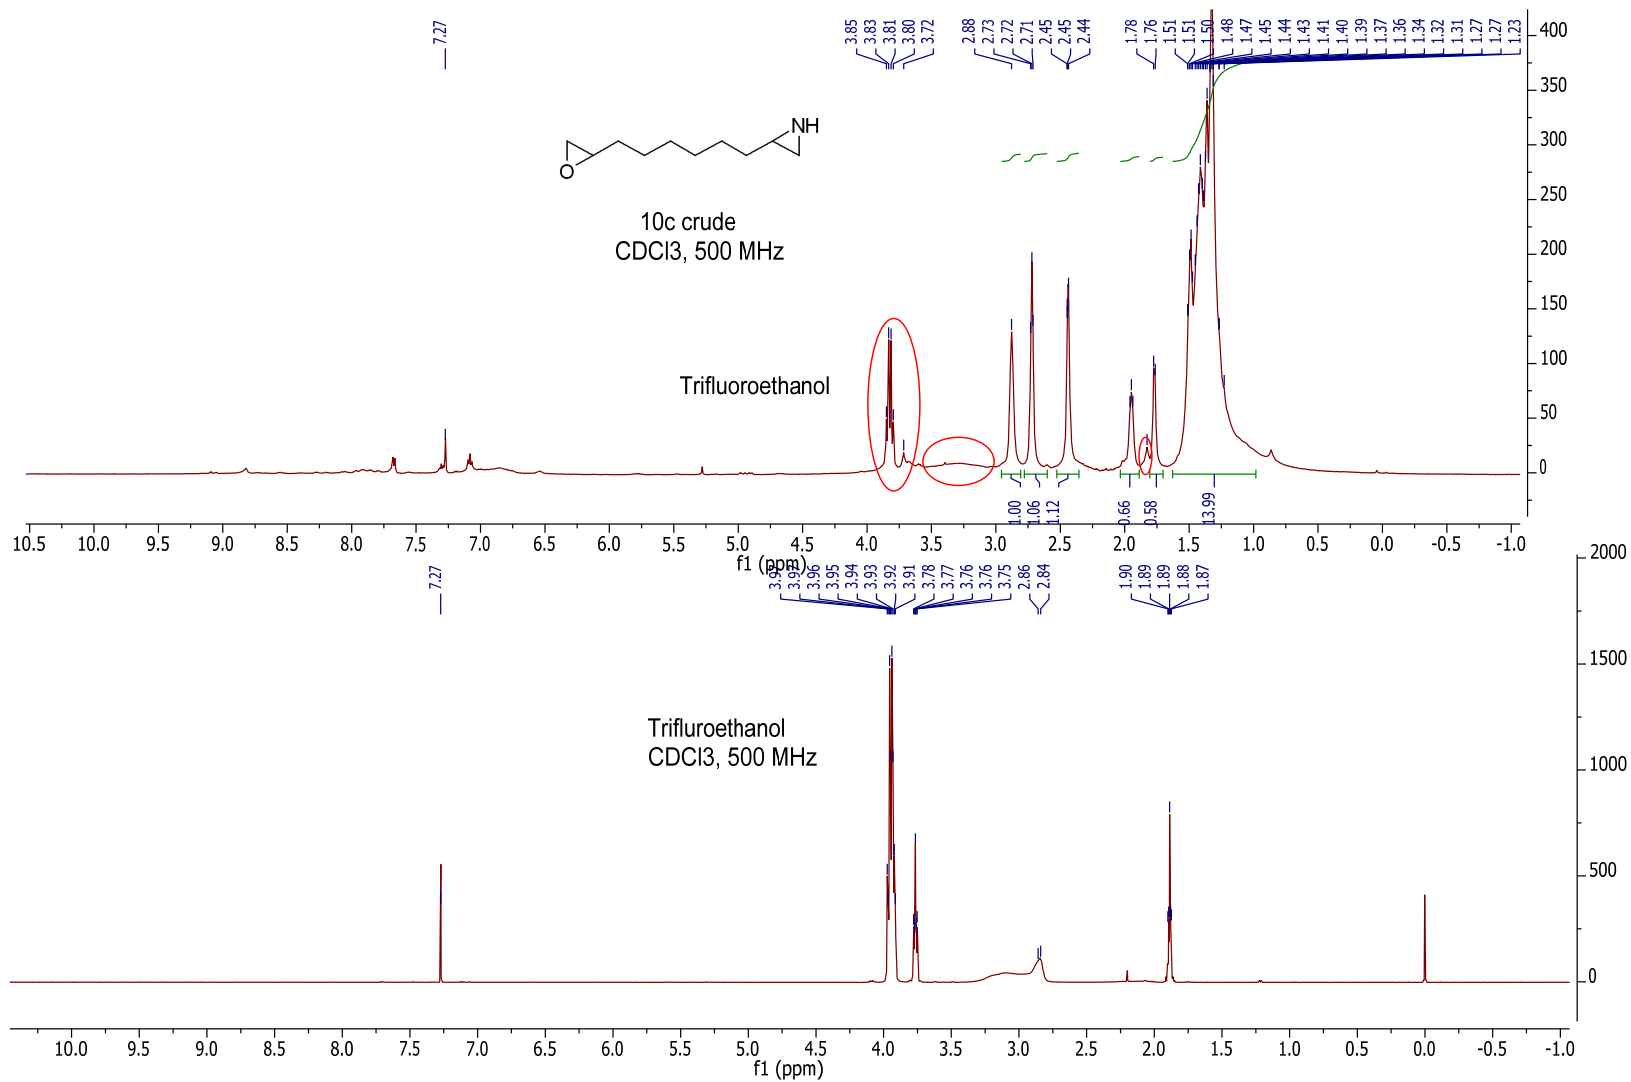

**Figure S2b.** Epoxy-olefin N-H aziridination study – Stacked crude <sup>1</sup>H-NMR of N-H aziridine **10c** and trifluoroethanol.

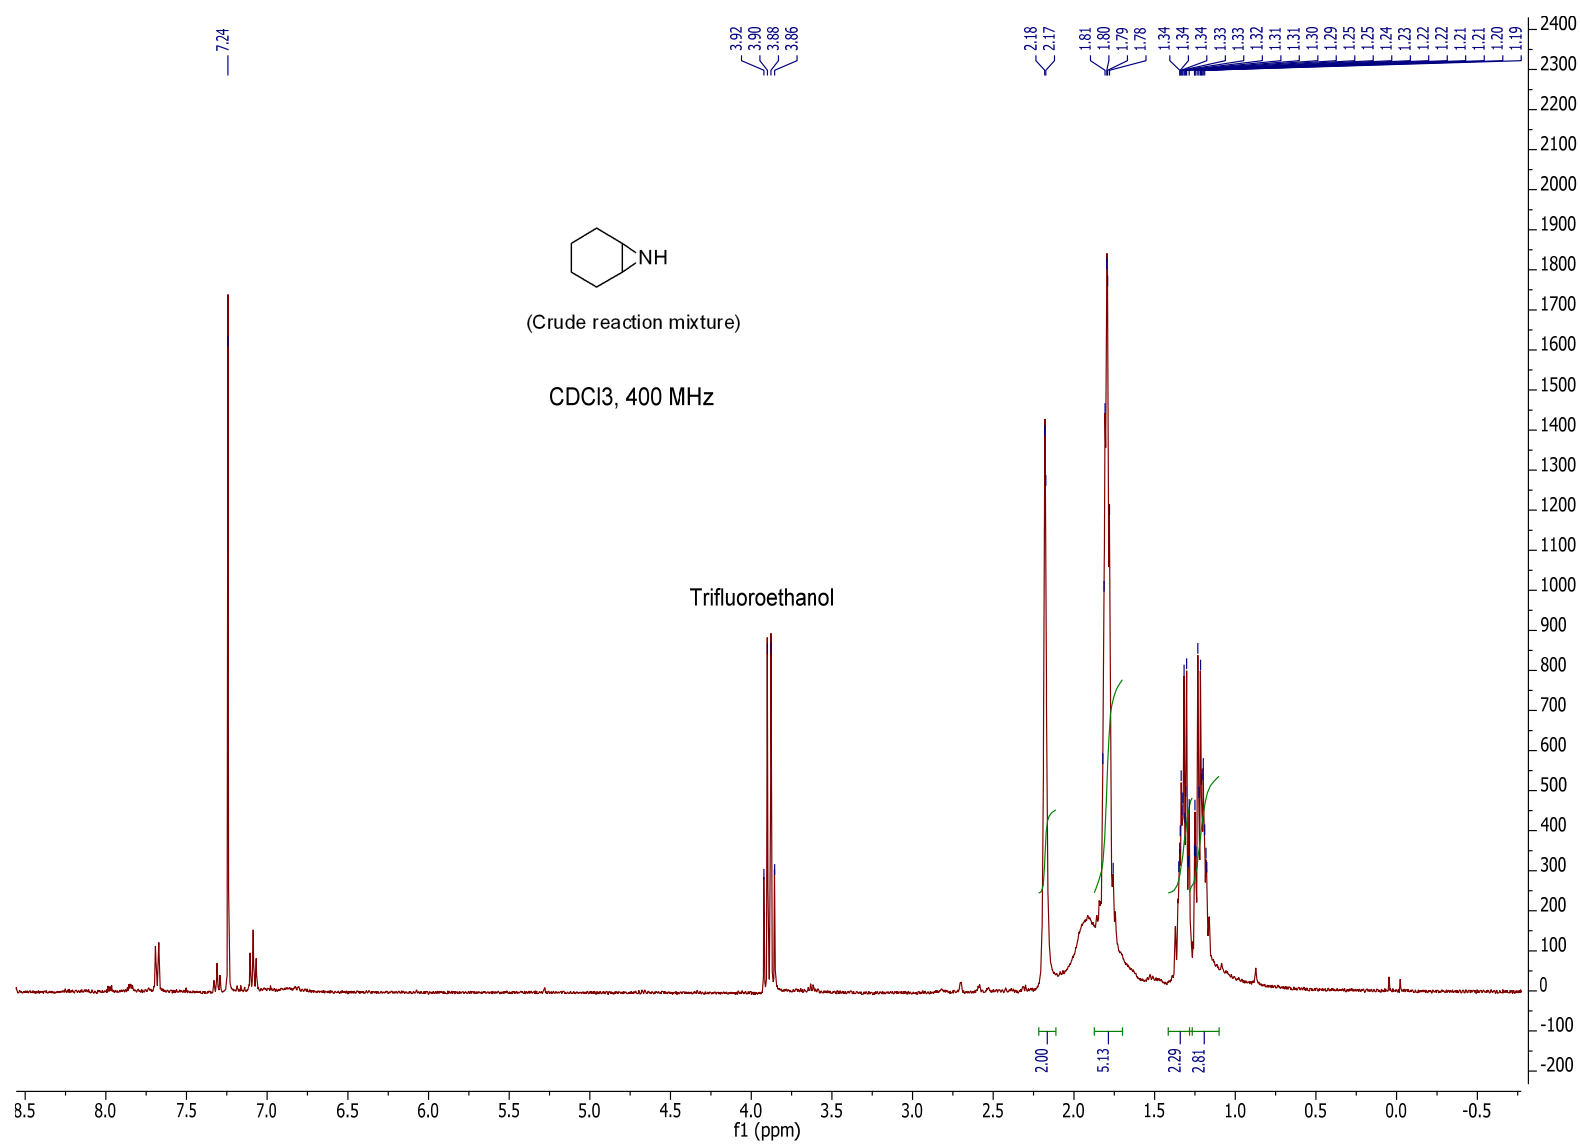

**Figure S3a.** Search for allylic C-H amination side product(s) during the N-H aziridination of cyclohexene **9n** – Crude <sup>1</sup>H-NMR of N-H aziridine **10n**.

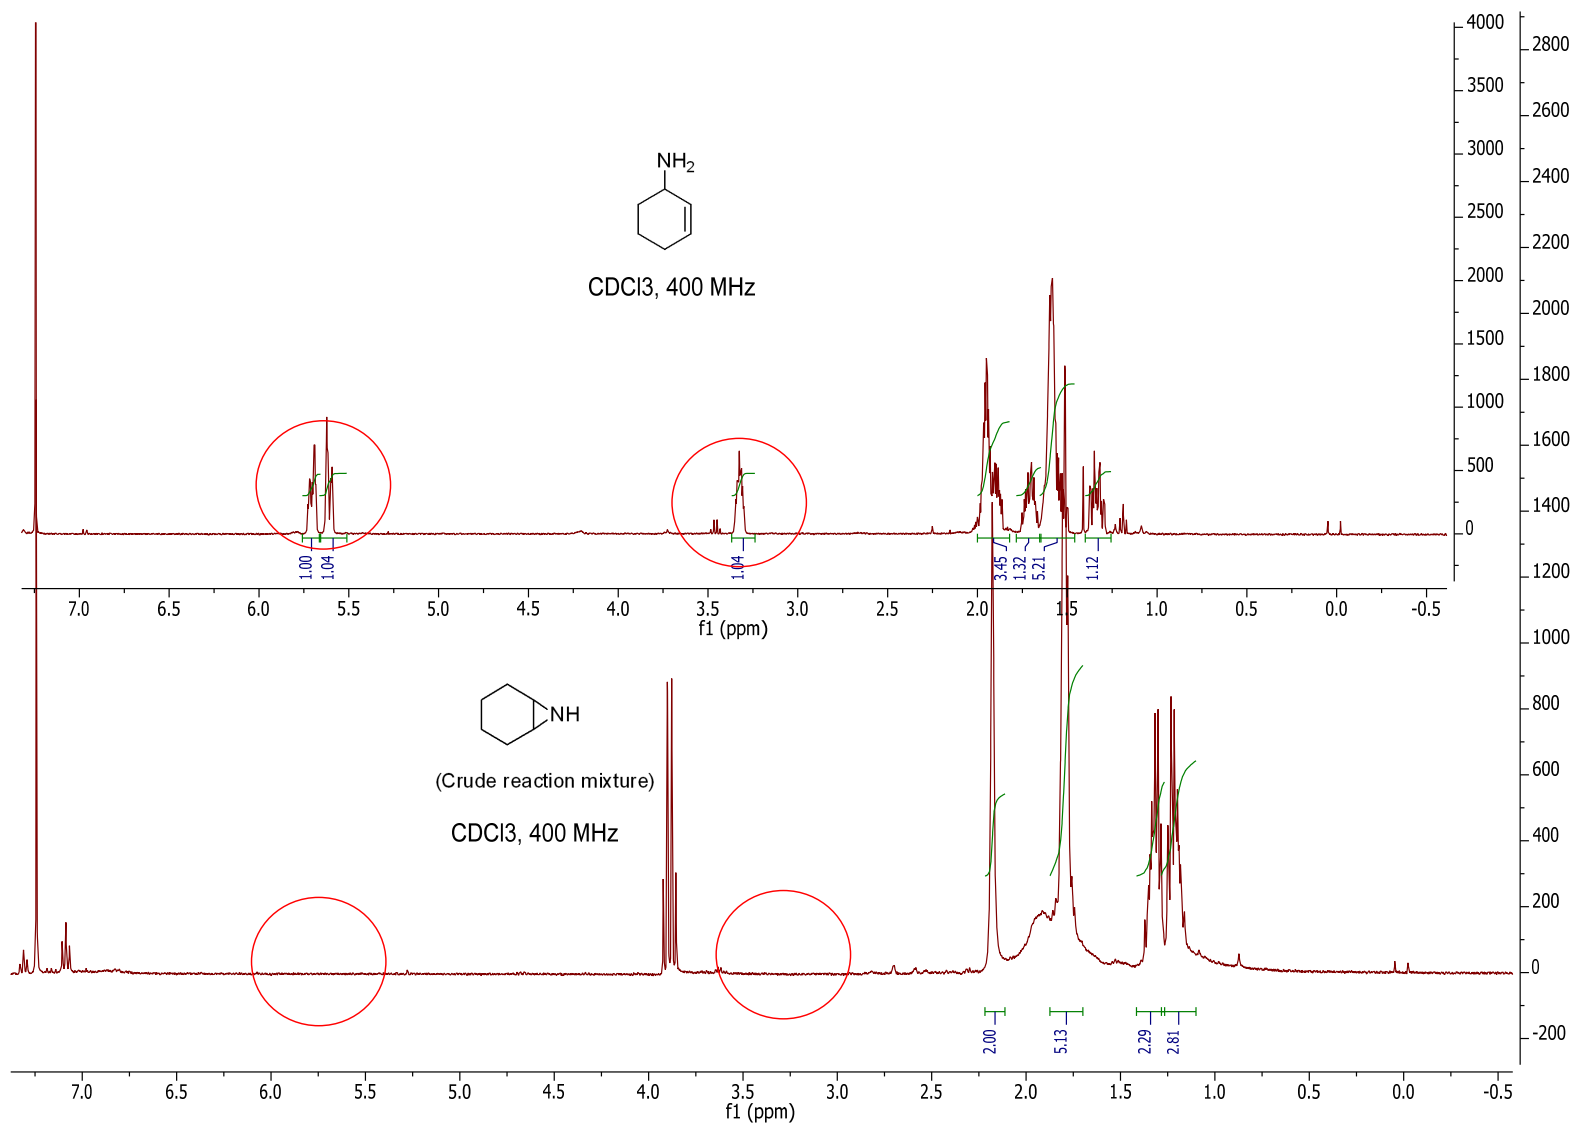

**Figure S3b.** Search for allylic C-H amination side product(s) during the N-H aziridination of cyclohexene **9n** – Stacked crude <sup>1</sup>H-NMR of N-H aziridine **10n** and independently prepared analytically pure cyclohex-2-enamine.

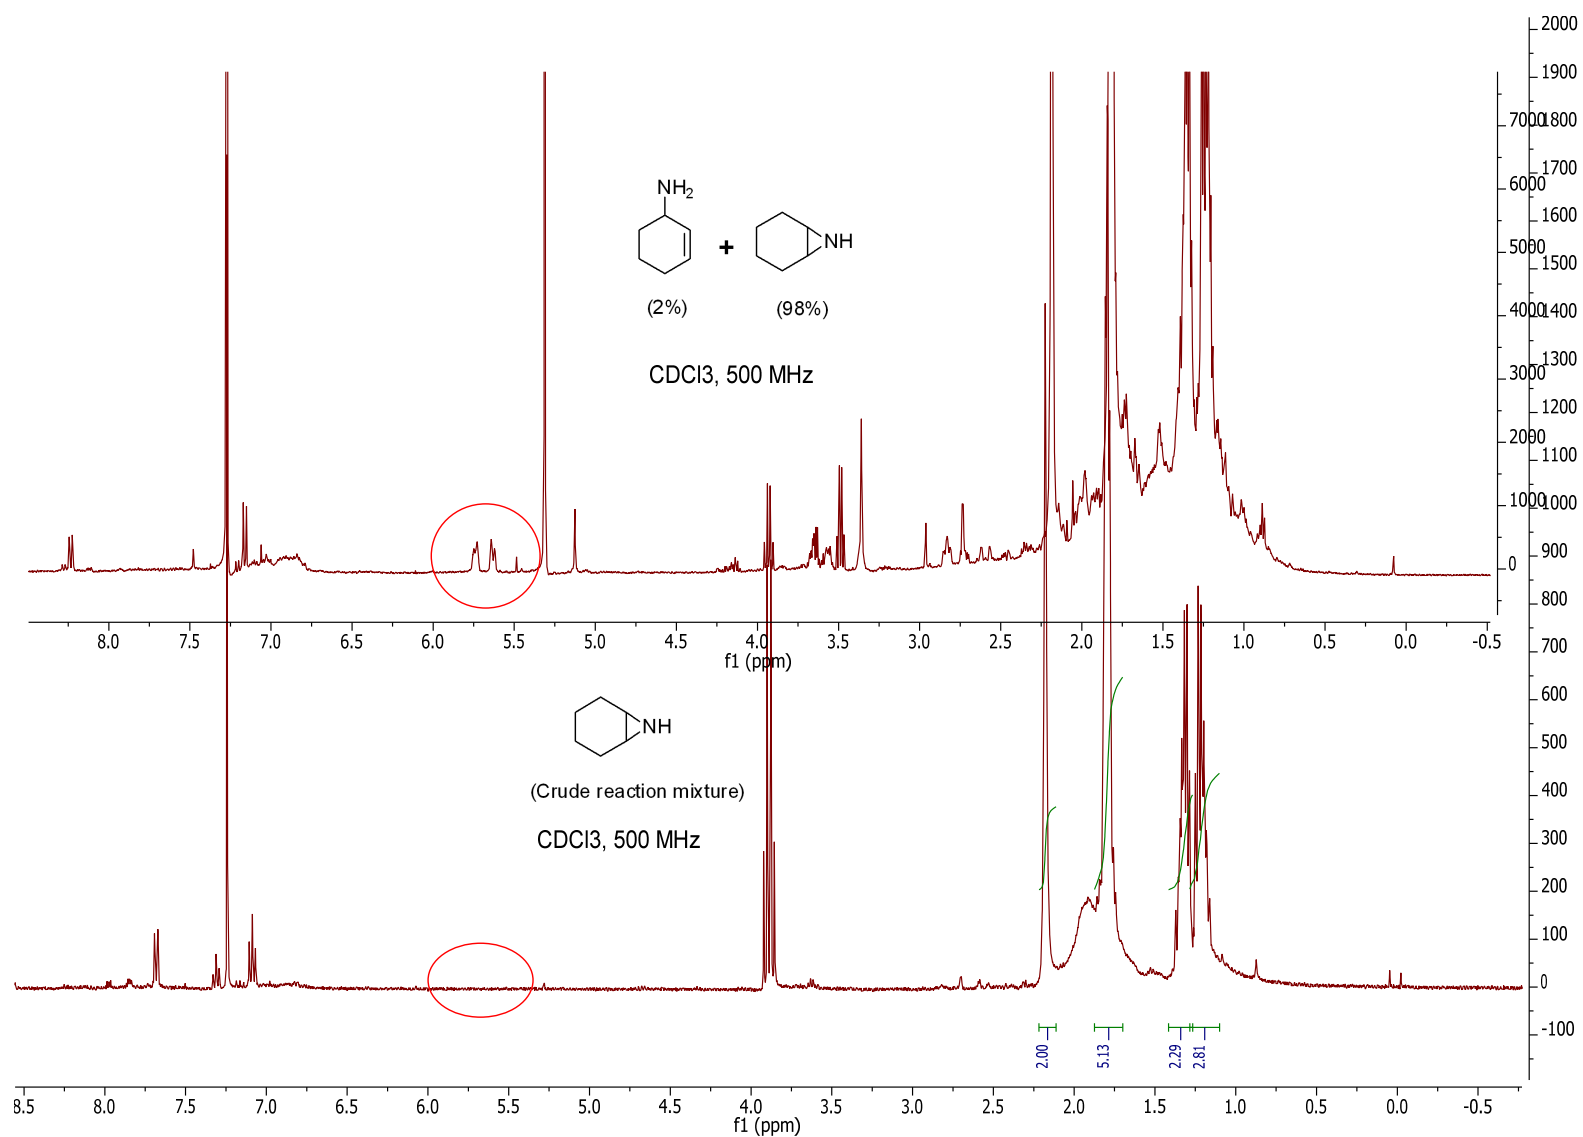

**Figure S3c.** Search for allylic C-H amination side product(s) during the N-H aziridination of cyclohexene **9n** – Stacked crude <sup>1</sup>H-NMR of N-H aziridine **10n** spiked with 2% of independently prepared cyclohex-2-enamine.



Column Conditions: Chiralpak IC, 5% IPA/Hexanes, 0.5 mL/min, Injection volume - 5  $\mu$ L

I. Aziridine **12f** – Using Du Bois catalyst  $\text{Rh}_2(\text{esp})_2$

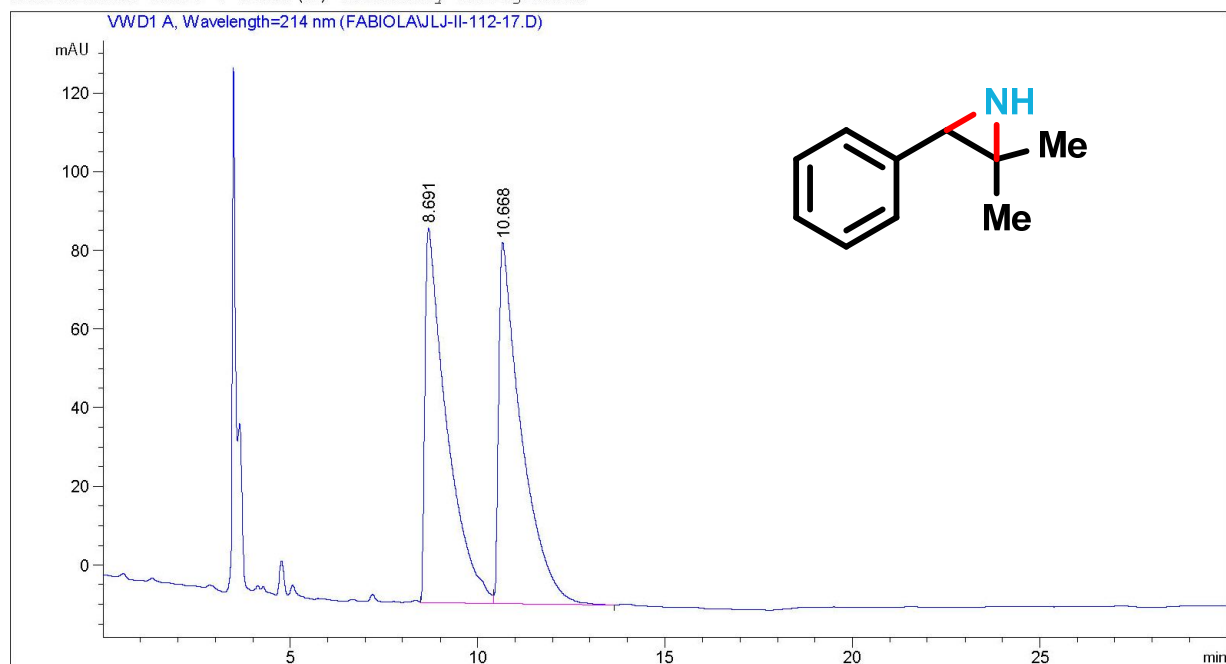

Signal 1: VWD1 A, Wavelength=214 nm

| Peak # | RetTime [min] | Type | Width [min] | Area [mAU*s] | Height [mAU] | Area %  |
|--------|---------------|------|-------------|--------------|--------------|---------|
| 1      | 8.691         | VV   | 0.5435      | 3829.91064   | 95.17074     | 49.8774 |
| 2      | 10.668        | VB   | 0.5655      | 3848.74243   | 91.72713     | 50.1226 |

Totals : 7678.65308 186.89787

**Figure S4a.** Chiral induction studies – Chromatogram showing the baseline separation of the two enantiomers of N-H aziridine **12f** using chiral HPLC.

II. Aziridine **12f** – Using chiral catalyst Rh<sub>2</sub>-(S)-PTAD

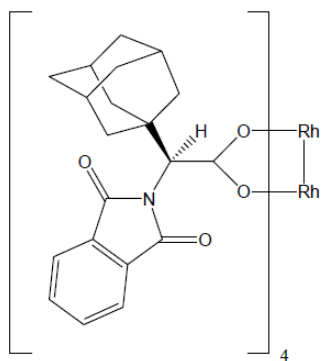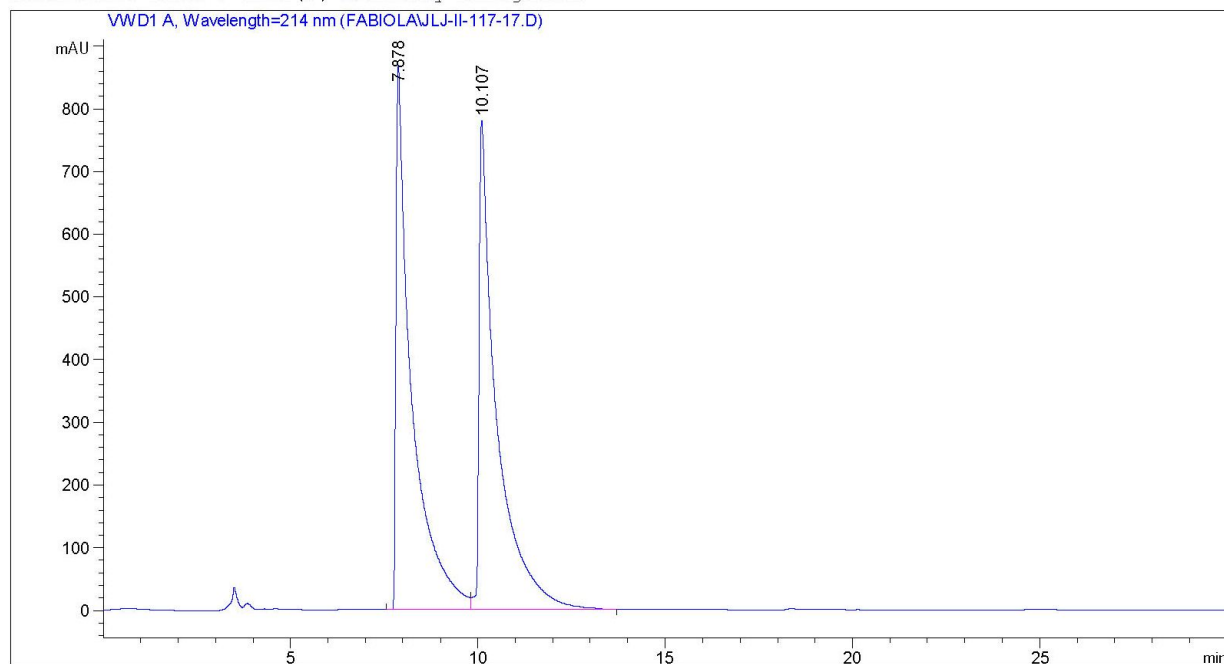

Signal 1: VWD1 A, Wavelength=214 nm

| Peak # | RetTime [min] | Type | Width [min] | Area [mAU*s] | Height [mAU] | Area %  |
|--------|---------------|------|-------------|--------------|--------------|---------|
| 1      | 7.878         | BV   | 0.3776      | 2.52082e4    | 865.93591    | 50.0088 |
| 2      | 10.107        | VB   | 0.4211      | 2.51993e4    | 779.54169    | 49.9912 |

Totals : 5.04074e4 1645.47760

**Figure S4b.** Chiral induction studies – Chromatogram showing the baseline separation of the two enantiomers of N-H aziridine **12f** using chiral HPLC after the N-H aziridination of styrene **11f** using 5 mol% of Rh<sub>2</sub>-(S)-PTAD instead of 1 mol% of catalyst **2**.

## General Amino-oxyarylation Procedure

$\text{Rh}_2(\text{OAc})_4$  or  $\text{Rh}_2(\text{esp})_2$  (Du Bois' catalyst, 1-5 mol%) and aminating agent (1.5 equiv) were added to a stirring, rt solution of alkene (1.0 equiv) in dry  $\text{CH}_3\text{CN}$  (0.1-0.5 M), unless otherwise specified. The reaction was stirred at the specified temperature and monitored by TLC. More catalyst and aminating agent were added, if required. After completion, the reaction mixture was diluted with EtOAc and washed once with 15% aqueous  $\text{NaHCO}_3$  solution. The aqueous layer was extracted twice with EtOAc and the combined organic extracts were washed with brine, dried over  $\text{Na}_2\text{SO}_4$ , and concentrated in *vacuo*. The residue was purified on pre-packed  $\text{SiO}_2$  columns using a CombiFlash chromatograph.

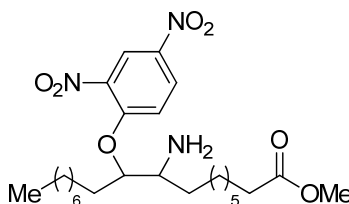

**Methyl 9-amino-10-(2,4-dinitrophenoxy)octadecanoate:** Following the general aminoaryloxylation procedure, methyl oleate **7** (10 mg, 34  $\mu\text{mol}$ ), aminating agent **1a** (10 mg, 51  $\mu\text{mol}$ ), and  $\text{Rh}_2(\text{OAc})_4$  (0.8 mg, 1.7  $\mu\text{mol}$ ) were stirred in dry  $\text{CH}_3\text{CN}$  (0.5 mL) at rt for 2 h, then at 60  $^\circ\text{C}$  for 10 h. Chromatographic purification of the crude product by preparative TLC using 40% EtOAc/hexanes as eluent afforded the title aminoaryloxyated product as a viscous oil (2.5 mg, 15%). TLC:  $R_f \approx 0.5$  (30% EtOAc/hexanes);  $^1\text{H}$  NMR (500 MHz,  $\text{CDCl}_3$ )  $\delta$  9.16 (d,  $J = 2.7$  Hz, 1H), 8.93 (dd,  $J = 9.0, 2.4$  Hz, 1H), 8.24 (dd,  $J = 9.6, 2.7$  Hz, 1H), 6.94 (dd,  $J = 9.7, 3.5$  Hz, 1H), 3.87–3.83 (m, 1H), 3.67 (s, 1.5H), 3.66 (s, 1.5H), 3.65–3.61 (m, 1H), 2.30 (t,  $J = 7.4$  Hz, 1H), 2.29 (t,  $J = 7.4$  Hz, 1H), 1.96 (br s, 1H), 1.80–1.77 (m, 1H), 1.76–1.14 (m, 30H), 0.87 (t,  $J = 6.9$  Hz, 1.5H), 0.86 (t,  $J = 6.9$  Hz, 1.5H);  $^{13}\text{C}$  NMR (101 MHz,  $\text{CDCl}_3$ )  $\delta$  174.25, 174.24, 148.68, 148.66, 135.58, 130.31, 130.25, 124.77, 114.06, 114.03, 72.17, 57.40, 57.31, 51.51, 51.49, 34.50, 34.44, 33.96, 33.93, 32.13, 32.06, 31.77, 29.54, 29.43, 29.42, 29.40, 29.25, 29.17, 29.15, 29.12, 29.03, 28.96, 28.86, 26.19, 26.04, 25.79, 25.65, 24.74, 22.62, 22.61, 14.07; HRMS (ESI $^+$ ) Calcd. for  $[\text{C}_{25}\text{H}_{41}\text{N}_3\text{O}_7+\text{Na}]^+$  518.2837, Found 518.2827.

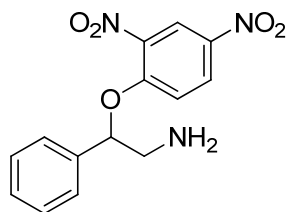

**4a**

**2-(2,4-Dinitrophenoxy)-2-phenylethanamine:** Following the general aminoaryloxylation procedure, styrene **3a** (10 mg, 0.09 mmol), aminating agent **1a** (27 mg, 0.135 mmol), and  $\text{Rh}_2(\text{OAc})_4$  (2.0 mg, 4.5  $\mu\text{mol}$ ) were stirred in dry  $\text{CH}_3\text{CN}$  (0.5 mL) at rt for 1 h, then at 60 °C for 2 h. Chromatographic purification of the crude product by PTLC using EtOAc/hexanes (1:1) as eluent afforded the title aminoaryloxylated product as a foamy solid (7 mg, 25%), mp 123.6–123.9 °C. TLC:  $R_f \approx 0.5$  (50% EtOAc/hexanes);  $^1\text{H}$  NMR (400 MHz,  $\text{CDCl}_3$ )  $\delta$  9.11–9.08 (m, 1H), 8.89 (br s, 1H), 8.20 (dd,  $J = 9.4, 2.6$  Hz, 1H), 7.52–7.31 (m, 5H), 6.89 (d,  $J = 9.5$  Hz, 1H), 5.07 (dd,  $J = 7.7, 4.3$  Hz, 1H), 3.72–3.56 (m, 2H);  $^{13}\text{C}$  NMR (101 MHz,  $\text{CDCl}_3$ )  $\delta$  148.33, 140.62, 136.08, 130.50, 130.19, 129.01, 128.82, 125.76, 124.27, 114.07, 72.42, 50.37; HRMS (ESI<sup>+</sup>) Calcd. for  $[\text{C}_{14}\text{H}_{13}\text{N}_3\text{O}_5+\text{Na}]^+$  326.0747, Found 326.0741.

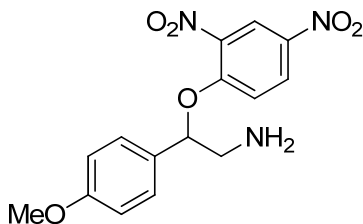

**4b**

**2-(2,4-Dinitrophenoxy)-2-(4-methoxyphenyl)ethanamine:** Following the general aminoaryloxylation procedure, 4-methoxystyrene **3b** (30 mg, 0.22 mmol), aminating agent **1a** (66 mg, 0.33 mmol), and  $\text{Rh}_2(\text{esp})_2$  (1.7 mg, 2.2  $\mu\text{mol}$ ) were stirred in dry  $\text{CH}_3\text{CN}$  (1 mL) at rt for 3 h. Chromatographic purification of the crude product by PTLC using EtOAc/hexanes (40%) as eluent afforded the title aminoaryloxylated product as a solid (57 mg, 75%), mp 114.6 °C. TLC:  $R_f \approx 0.3$  (40% EtOAc/hexanes);  $^1\text{H}$  NMR (500 MHz,  $\text{CDCl}_3$ )  $\delta$  9.16 (d,  $J = 2.7$  Hz, 1H), 8.90 (t,  $J = 5.4$  Hz, 1H), 8.25 (dd,  $J = 9.5, 2.7$  Hz, 1H), 7.38 (d,  $J = 8.6$  Hz, 2H), 6.97–6.91 (m, 3H), 5.08–5.02 (m, 1H), 3.84 (s, 3H), 3.73–3.55 (m, 2H), 2.20 (br s, 1H);  $^{13}\text{C}$  NMR (101 MHz,  $\text{CD}_3\text{CN}$ )  $\delta$  159.37, 148.66, 135.67, 133.92, 129.83, 127.29, 123.73, 117.38, 115.22,

113.75, 70.83, 54.93, 50.23; HRMS (ESI<sup>+</sup>) Calcd. for [C<sub>15</sub>H<sub>15</sub>N<sub>3</sub>O<sub>6</sub>+Na]<sup>+</sup> 356.0853, Found 356.0846.

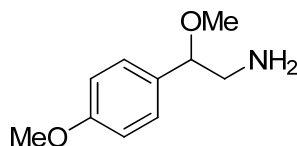

**5**

**2-Methoxy-2-(4-methoxyphenyl)ethanamine:** Following the general aminoaryloxylation procedure, 4-methoxystyrene **3b** (68 mg, 0.5 mmol), aminating agent **1a** (0.150 g, 0.75 mmol), and Rh<sub>2</sub>(esp)<sub>2</sub> (19 mg, 25 μmol) were stirred in dry MeOH (1 mL) at rt for 4 h. Chromatographic purification of the crude product by CombiFlash using 5-10% MeOH/CH<sub>2</sub>Cl<sub>2</sub> as eluent afforded the title aminomethoxylated product as a viscous liquid (52 mg, 56%) along with **4b** (36 mg, 22%). TLC: R<sub>f</sub> ≈ 0.3 (80% EtOAc/hexanes); <sup>1</sup>H NMR (400 MHz, CDCl<sub>3</sub>) δ 7.19 (d, *J* = 8.6 Hz, 2H), 6.87 (d, *J* = 8.7 Hz, 2H), 4.07 (dd, *J* = 7.7, 4.3 Hz, 1H), 3.79 (s, 3H), 3.22 (s, 3H), 2.88 (dd, *J* = 13.2, 7.7 Hz, 1H), 2.78 (dd, *J* = 13.2, 4.4 Hz, 1H), 1.48 (br s, 2H); <sup>13</sup>C NMR (101 MHz, CDCl<sub>3</sub>) 159.21, 132.06, 127.91, 113.83, 85.30, 56.62, 55.23, 48.91; HRMS (ESI<sup>+</sup>) Calcd. for [C<sub>10</sub>H<sub>15</sub>NO<sub>2</sub>+Na]<sup>+</sup> 204.0995, Found 204.0991.

### General N-H/N-Me Aziridination Procedure

A round bottom flask equipped with a magnetic stirrer was charged with alkene (0.5 mmol, 1.0 equiv) and CF<sub>3</sub>CH<sub>2</sub>OH (5 mL), unless otherwise specified. To this solution at the specified temperature were added Rh<sub>2</sub>(esp)<sub>2</sub> (Du Bois' catalyst, 3.8 mg, 5 μmol, 1 mol%) and aminating agent **1a** (or **1b**) (0.119 g, 0.6 mmol, 1.2 equiv). The reaction was stirred at the specified temperature and monitored by TLC. More catalyst and aminating agent were added, if required. After completion, the reaction mixture was diluted with CH<sub>2</sub>Cl<sub>2</sub> (10 mL) and washed once with 15% aqueous NaHCO<sub>3</sub> solution (5 mL). The aqueous layer was extracted twice with CH<sub>2</sub>Cl<sub>2</sub> (10 mL) and the combined organic portions were washed once with brine (5 mL), dried over Na<sub>2</sub>SO<sub>4</sub>, and concentrated in *vacuo*. The residue was purified on pre-packed SiO<sub>2</sub> columns using a CombiFlash chromatograph.

## Scheme S1

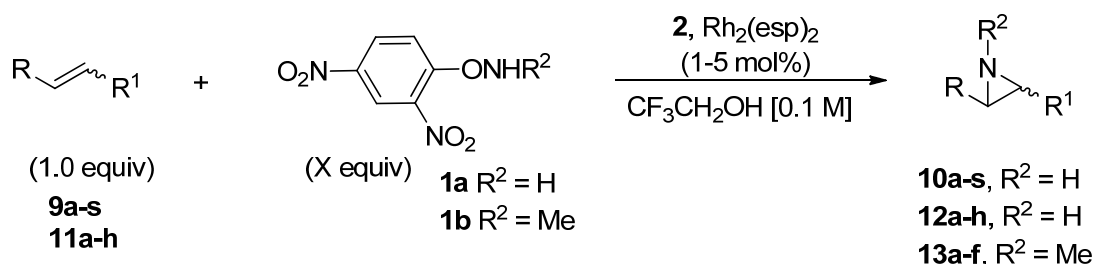

## Experimental

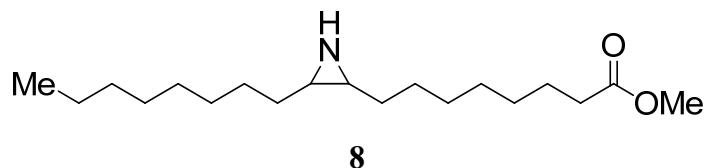

**Methyl (Z)-8-(3-octylaziridin-2-yl)octanoate:**(**42**, **43**) Following the general aziridination procedure, methyl oleate **7** (0.148 g, 0.5 mmol), aminating agent **1a** (0.119 g, 0.6 mmol), and  $\text{Rh}_2(\text{esp})_2$  (3.8 mg, 5  $\mu\text{mol}$ ) were stirred in  $\text{CF}_3\text{CH}_2\text{OH}$  (5 mL) at rt for 3 h. Chromatographic purification of the crude product using 50–70% EtOAc/hexanes as eluent afforded the title aziridine as a viscous oil which solidified upon standing (0.130 g, 83%), mp 51.4–51.7 °C. TLC:  $R_f \approx 0.3$  (60% EtOAc/hexanes);  $^1\text{H}$  NMR (400 MHz,  $\text{CDCl}_3$ )  $\delta$  3.63 (s, 3H), 2.27 (t,  $J = 7.5$  Hz, 2H), 1.93–1.90 (m, 2H), 1.66–1.53 (m, 2H), 1.49–1.19 (m, 25H), 0.85 (t,  $J = 7.0$  Hz, 3H);  $^{13}\text{C}$  NMR (101 MHz,  $\text{CDCl}_3$ )  $\delta$  174.24, 51.39, 34.94, 34.90, 34.05, 31.84, 29.60, 29.58, 29.37, 29.24, 29.21, 29.05, 28.87, 28.82, 28.04, 27.97, 24.89, 22.63, 14.07; HRMS (ESI<sup>+</sup>) Calcd. for  $[\text{C}_{19}\text{H}_{37}\text{NO}_2 + \text{H}]^+$  312.2897, Found 312.2887.

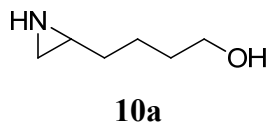

**4-(Aziridin-2-yl)butan-1-ol:** Following the general aziridination procedure, hex-5-en-1-ol **9a** (0.1 g, 1.0 mmol), aminating agent **1a** (0.239 g, 1.2 mmol), and  $\text{Rh}_2(\text{esp})_2$  (38 mg, 50  $\mu\text{mol}$ , 5 mol%) were stirred in  $\text{CF}_3\text{CH}_2\text{OH}$  (10 mL) at rt for 2 h. Chromatographic purification on a CombiFlash system using 10-15% MeOH/ $\text{CH}_2\text{Cl}_2$  as eluent afforded the title aziridine as a viscous oil (68 mg, 59%). TLC:  $R_f \approx 0.4$  (20% MeOH/ $\text{CH}_2\text{Cl}_2$ );  $^1\text{H}$  NMR (500 MHz,  $\text{CDCl}_3$ )  $\delta$  3.59 (td,  $J = 6.2, 1.7$  Hz, 2H), 2.17 (br s, 2H), 1.97–1.94 (m, 1H), 1.77 (d,  $J = 5.9$  Hz, 1H), 1.68–

1.39 (m, 5H), 1.42–1.27 (m, 2H);  $^{13}\text{C}$  NMR (126 MHz,  $\text{CDCl}_3$ )  $\delta$  62.01, 33.53, 32.27, 30.29, 25.02, 23.82; HRMS ( $\text{ESI}^+$ ) Calcd. for  $[\text{C}_6\text{H}_{13}\text{NO}+\text{H}]^+$  116.1070, Found 116.1074.

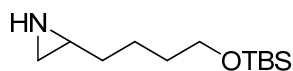

**10b**

**2-(4-(*tert*-Butyldimethylsilyloxy)butyl)aziridine:** Following the general aziridination procedure, *tert*-butyl(hex-5-en-1-yloxy)dimethylsilane(44) **9b** (0.107 g, 0.5 mmol), aminating agent **1a** (0.119 g, 0.6 mmol), and  $\text{Rh}_2(\text{esp})_2$  (19 mg, 25  $\mu\text{mol}$ , 5 mol%) were stirred in  $\text{CF}_3\text{CH}_2\text{OH}$  (5 mL) at rt for 2 h. Chromatographic purification on a CombiFlash system using 2–3%  $\text{MeOH}/\text{CH}_2\text{Cl}_2$  as eluent afforded the title aziridine as a viscous oil (83 mg, 72%). TLC:  $R_f \approx 0.5$  (10%  $\text{MeOH}/\text{CH}_2\text{Cl}_2$ );  $^1\text{H}$  NMR (500 MHz,  $\text{CDCl}_3$ )  $\delta$  3.61 (t,  $J = 6.3$  Hz, 2H), 1.95–1.91 (m, 1H), 1.75 (d,  $J = 5.8$  Hz, 1H), 1.62–1.34 (m, 6H), 1.32 (d,  $J = 3.6$  Hz, 1H), 0.88 (s, 9H), 0.04 (s, 6H);  $^{13}\text{C}$  NMR (101 MHz,  $\text{CDCl}_3$ )  $\delta$  63.07, 34.21, 32.58, 30.25, 25.93, 25.05, 23.85, 18.32, -5.32; HRMS ( $\text{ESI}^+$ ) Calcd. for  $[\text{C}_{12}\text{H}_{27}\text{NOSi}+\text{H}]^+$  230.1935, Found 230.1934.

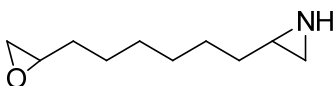

**10c**

**2-(6-(Oxiran-2-yl)hexyl)aziridine:** Following the general aziridination procedure, 2-(oct-7-en-1-yl)oxirane **9c** (77 mg, 0.5 mmol), aminating agent **1a** (0.199 g, 1.0 mmol), and  $\text{Rh}_2(\text{esp})_2$  (19 mg, 25  $\mu\text{mol}$ ) were stirred in  $\text{CF}_3\text{CH}_2\text{OH}$  (5 mL) at rt for 5 h. Chromatographic purification on a CombiFlash system gave the title aziridine as a viscous oil (65 mg, 77%). TLC:  $R_f \approx 0.5$  (10%  $\text{MeOH}/\text{CH}_2\text{Cl}_2$ );  $^1\text{H}$  NMR (400 MHz,  $\text{CDCl}_3$ )  $\delta$  2.90–2.84 (m, 1H), 2.71 (dd,  $J = 4.9, 4.2$  Hz, 1H), 2.43 (dd,  $J = 5.0, 2.7$  Hz, 1H), 1.93–1.87 (m, 1H), 1.72 (d,  $J = 5.8$  Hz, 1H), 1.55–1.20 (m, 13H), 1.04 (br s, 1H);  $^{13}\text{C}$  NMR (101 MHz,  $\text{CDCl}_3$ )  $\delta$  52.33, 47.08, 34.33, 32.41, 30.32, 29.36, 29.33, 27.44, 25.88, 25.07; HRMS ( $\text{ESI}^+$ ) Calcd. for  $[\text{C}_{10}\text{H}_{19}\text{NO}+\text{H}]^+$  170.1539, Found 170.1544.

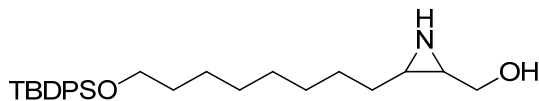

**10d**

**(Z)-3-(8-(*tert*-Butyldimethylsilyloxy)octyl)aziridin-2-yl)methanol:** Following the general aziridination procedure, (*Z*)-11-(*tert*-butyldiphenylsilyloxy)undec-2-en-1-ol **9d** (21 mg, 50  $\mu$ mol), aminating agent **1a** (12 mg, 60  $\mu$ mol), and Rh<sub>2</sub>(esp)<sub>2</sub> (0.4 mg, 0.5  $\mu$ mol) were stirred in CF<sub>3</sub>CH<sub>2</sub>OH (0.5 mL) at rt. After 2 h, another portion of catalyst (0.4 mg, 0.5  $\mu$ mol, 1 mol%) and aminating agent (12 mg, 60  $\mu$ mol, 1.2 equiv) were added and the stirring was continued for an additional 1 h. Chromatographic purification via preparative TLC using 15% MeOH/CH<sub>2</sub>Cl<sub>2</sub> as eluent afforded the title aziridine as a viscous oil (14 mg, 64%). TLC: R<sub>f</sub>  $\approx$  0.4 (15% MeOH/CH<sub>2</sub>Cl<sub>2</sub>); <sup>1</sup>H NMR (500 MHz, CDCl<sub>3</sub>)  $\delta$  7.69–7.66 (m, 4H), 7.49–7.33 (m, 6H), 3.77 (dd, *J* = 11.5, 4.9 Hz, 1H), 3.66 (t, *J* = 6.5 Hz, 2H), 3.52 (dd, *J* = 11.6, 7.1 Hz, 1H), 2.35 (br s, 1H), 2.15 (br s, 1H), 1.81 (br s, 2H), 1.55 (app qn, *J* = 7.0 Hz, 2H), 1.51–1.17 (m, 12H), 1.05 (s, 9H); <sup>13</sup>C NMR (101 MHz, CDCl<sub>3</sub>)  $\delta$  135.55, 134.16, 129.45, 127.54, 63.98, 61.11, 35.42, 35.31, 32.56, 29.69, 29.55, 29.41, 29.30, 28.80, 27.98, 26.86, 25.74, 19.21; HRMS (ESI<sup>+</sup>) Calcd. for [C<sub>27</sub>H<sub>41</sub>NO<sub>2</sub>Si+H]<sup>+</sup> 440.2979, Found 440.2980.

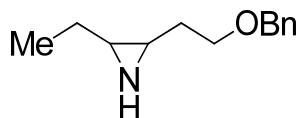

**10e**

**(Z)-2-(2-(Benzyloxy)ethyl)-3-ethylaziridine:** Following the general aziridination procedure, (*Z*)-((hex-3-en-1-yloxy)methyl)benzene(*45*) **9e** (38 mg, 0.2 mmol), aminating agent **1a** (48 mg, 0.24 mmol), and Rh<sub>2</sub>(esp)<sub>2</sub> (4.5 mg, 6  $\mu$ mol, 3 mol%) were stirred in CF<sub>3</sub>CH<sub>2</sub>OH (2 mL) at rt for 36 h. The catalyst was added in three equal portions; the remaining two at intervals of 12 h after the initial addition. The crude aziridine was purified by Et<sub>3</sub>N basified preparative TLC using EtOAc as eluent to afford the title aziridine as an oil (32 mg, 78%). TLC: R<sub>f</sub>  $\approx$  0.2 (EtOAc); <sup>1</sup>H NMR (500 MHz, CDCl<sub>3</sub>)  $\delta$  7.36–7.33 (m, 3H), 7.32–7.22 (m, 2H), 4.54 (s, 2H), 3.64 (dd, *J* = 7.0, 6.0 Hz, 2H), 2.26–2.13 (m, 1H), 2.20–1.90 (m, 1H), 1.85–1.78 (m, 1H), 1.64–1.57 (m, 1H), 1.44–1.38 (m, 2H), 1.26 (br s, 1H), 1.01 (t, *J* = 7.4 Hz, 3H); <sup>13</sup>C NMR (126 MHz, CDCl<sub>3</sub>)  $\delta$  138.46, 128.37, 127.64, 127.55, 73.02, 68.93, 36.30, 32.20, 29.00, 22.07, 12.09; HRMS (ESI<sup>+</sup>) Calcd. for [C<sub>13</sub>H<sub>19</sub>NO+H]<sup>+</sup> 206.1539, Found 206.1536.

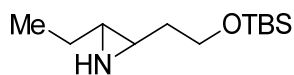

**10f**



**(E)-2-(2-(*tert*-Butyldimethylsilyloxy)ethyl)-3-ethylaziridine:** Following the general aziridination procedure, (*E*)-*tert*-butyl(hex-3-en-1-yloxy)dimethylsilane **9f** (54 mg, 0.25 mmol), aminating agent **1a** (60 mg, 0.3 mmol), and Rh<sub>2</sub>(esp)<sub>2</sub> (1.9 mg, 2.5 μmol) were stirred in CF<sub>3</sub>CH<sub>2</sub>OH (2.5 mL) at rt for 4 h. Chromatographic purification of the crude product by Et<sub>3</sub>N basified preparative TLC using 80% EtOAc/hexanes as eluent afforded the title aziridine as an oil (41 mg, 72%). TLC: R<sub>f</sub> ≈ 0.3 (80% EtOAc/hexanes); <sup>1</sup>H NMR (500 MHz, CDCl<sub>3</sub>) δ 3.74 (t, *J* = 6.2 Hz, 2H), 1.77 (br s, 1H), 1.69–1.63 (m, 2H), 1.62–1.53 (m, 1H), 1.51–1.37 (m, 2H), 1.00 (t, *J* = 7.4 Hz, 3H), 0.90 (s, 9H), 0.07 (s, 6H); <sup>13</sup>C NMR (126 MHz, CDCl<sub>3</sub>) δ 61.49, 38.95, 37.21, 34.93, 27.21, 25.93, 18.30, 11.64, -5.34, -5.35; HRMS (ESI<sup>+</sup>) Calcd. for [C<sub>12</sub>H<sub>27</sub>NOSi+H]<sup>+</sup> 230.1935, Found 230.1943.

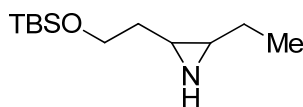

**10g**

**(Z)-2-(2-(*tert*-Butyldimethylsilyloxy)ethyl)-3-ethylaziridine:** Following the general aziridination procedure, (*Z*)-*tert*-butyl(hex-3-en-1-yloxy)dimethylsilane(46) **9g** (43 mg, 0.2 mmol), aminating agent **1a** (48 mg, 0.24 mmol), and Rh<sub>2</sub>(esp)<sub>2</sub> (1.5 mg, 2 μmol) were stirred in CF<sub>3</sub>CH<sub>2</sub>OH (2 mL) at rt. After 24 h, more Rh-catalyst (1.5 mg, 2 μmol, 1 mol%) was added and the stirring was continued for another 5 h. Chromatographic purification of the crude product by Et<sub>3</sub>N basified preparative TLC using 80% EtOAc/hexanes as eluent afforded the title aziridine as an oil (25 mg, 55%). TLC: R<sub>f</sub> ≈ 0.3 (80% EtOAc/hexanes); <sup>1</sup>H NMR (500 MHz, CDCl<sub>3</sub>) δ 3.80–3.70 (m, 2H), 2.17 (br s, 1H), 2.00 (br s, 1H), 1.75–1.65 (m, 1H), 1.57–1.45 (m, 1H), 1.42 (app qn, *J* = 7.2 Hz, 2H), 1.02 (t, *J* = 7.4 Hz, 3H), 0.90 (s, 9H), 0.06 (s, 6H); <sup>13</sup>C NMR (126 MHz, CDCl<sub>3</sub>) δ 61.81, 36.34, 32.06, 31.85, 25.97, 22.15, 18.37, 12.13, -5.29; HRMS (ESI<sup>+</sup>) Calcd. for [C<sub>12</sub>H<sub>27</sub>NOSi+H]<sup>+</sup> 230.1935, Found 230.1927.

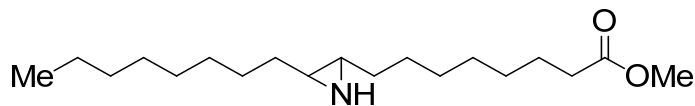

**10h**

**Methyl *E*-8-(3-octylaziridin-2-yl)octanoate:** Following the general aziridination procedure, methyl elaidate **9h** (0.148 g, 0.5 mmol), aminating agent **1a** (0.119 g, 0.6 mmol), and Rh<sub>2</sub>(esp)<sub>2</sub> (3.8 mg, 5 μmol) were stirred in CF<sub>3</sub>CH<sub>2</sub>OH (5 mL) at rt for 2 h. Chromatographic purification

of the crude product using 50–70% EtOAc/hexanes as eluent afforded the title aziridine as a viscous, reddish brown oil which solidified upon standing (0.142 g, 91%), mp 41.1–41.4 °C. TLC:  $R_f \approx 0.3$  (60% EtOAc/hexanes);  $^1\text{H NMR}$  (500 MHz,  $\text{CDCl}_3$ )  $\delta$  3.62 (s, 3H), 2.26 (t,  $J = 7.6$  Hz, 2H), 1.60–1.54 (m, 4H), 1.43–1.15 (m, 25H), 0.84 (t,  $J = 7.0$  Hz, 3H);  $^{13}\text{C NMR}$  (101 MHz,  $\text{CDCl}_3$ )  $\delta$  174.20, 51.38, 37.74, 37.68, 34.34, 34.29, 34.02, 31.82, 29.53, 29.42, 29.22, 29.20, 29.16, 29.02, 27.63, 27.55, 24.86, 22.61, 14.05; HRMS ( $\text{ESI}^+$ ) Calcd. for  $[\text{C}_{19}\text{H}_{37}\text{NO}_2+\text{H}]^+$  312.2897, Found 312.2886.

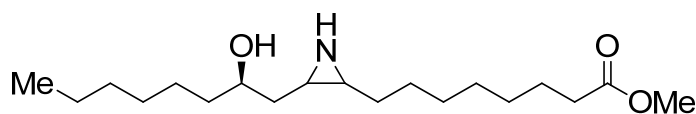

**10i**

**Methyl (Z)-8-[3-(2R-hydroxyoctyl)aziridine-2-yl]octanoate:(43)** Following the general aziridination procedure, methyl ricinoleate **9i** (0.156 g, 0.5 mmol), aminating agent **1a** (0.119 g, 0.6 mmol), and  $\text{Rh}_2(\text{esp})_2$  (11.4 mg, 15  $\mu\text{mol}$ , 3 mol%) were stirred in  $\text{CF}_3\text{CH}_2\text{OH}$  (5 mL) at rt for 6 h. The catalyst was added in three equal portions at intervals of 2 h. Purification of the crude product using 5–10% MeOH/ $\text{CH}_2\text{Cl}_2$  as eluent afforded the title aziridine as a viscous oil (0.135 g, 82%) obtained as a 1:1 mixture of diastereomers. TLC:  $R_f \approx 0.5$  (10% MeOH/ $\text{CH}_2\text{Cl}_2$ );  $^1\text{H NMR}$  (400 MHz,  $\text{CDCl}_3$ )  $\delta$  3.95–3.82 (m, 0.8H), 3.82–3.73 (m, 0.8H), 3.66 (s, 3H), 2.29 (t,  $J = 7.5$  Hz, 2H), 2.25–2.20 (m, 1H), 2.00–1.96 (m, 1H), 1.77–1.55 (m, 3H), 1.54–1.12 (m, 22H), 0.87 (t,  $J = 7.1$  Hz, 3H);  $^{13}\text{C NMR}$  (126 MHz,  $\text{CDCl}_3$ )  $\delta$  174.334, 174.326, 72.03, 71.10, 51.49, 37.74, 37.48, 34.54, 34.32, 34.07, 33.71, 33.49, 33.09, 31.87, 31.85, 31.34, 29.41, 29.38, 29.34, 29.30, 29.26, 29.24, 29.06, 28.79, 28.61, 27.79, 27.61, 25.86, 25.49, 24.91, 22.65, 22.64, 14.13, 14.12; HRMS ( $\text{ESI}^+$ ) Calcd. for  $[\text{C}_{19}\text{H}_{37}\text{NO}_3+\text{Na}]^+$  350.2666, Found 350.2660.

The diastereomers were resolved via preparative TLC using MeOH/EtOAc (1:5):

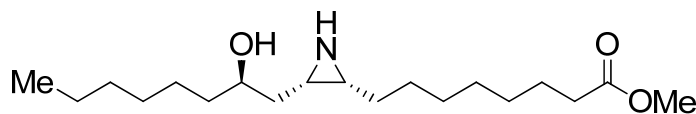

**10i - dr A**

**Methyl 8-[3(S)-(2R-hydroxyoctyl)aziridine-2R-yl]octanoate:** TLC:  $R_f \approx 0.5$  (17% MeOH/EtOAc);  $^1\text{H NMR}$  (500 MHz,  $\text{CDCl}_3$ )  $\delta$  3.84–3.80 (m, 1H), 3.67 (s, 3H), 2.31 (t,  $J = 7.5$

Hz, 2H), 2.27 (br s, 1H), 2.02 (br s, 1H), 1.71 (br s, 1H), 1.65–1.57 (m, 2H), 1.57–1.50 (m, 2H), 1.49–1.23 (m, 21H), 0.88 (t,  $J = 7.1$  Hz, 3H).

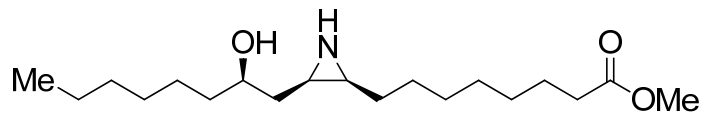

**10i - dr B**

**Methyl 8-[3*R*-(2*R*-hydroxyoctyl)aziridine-2(*S*)-yl]octanoate:** TLC:  $R_f \approx 0.4$  (17% MeOH/EtOAc);  $^1\text{H NMR}$  (500 MHz,  $\text{CDCl}_3$ )  $\delta$  3.92–3.84 (m, 1H), 3.68 (s, 3H), 2.31 (t,  $J = 7.5$  Hz, 2H), 2.26 (br s, 1H), 2.00 (br s, 1H), 1.80–1.72 (m, 1H), 1.67–1.60 (m, 2H), 1.54–1.17 (m, 23H), 0.89 (t,  $J = 7.1$  Hz, 3H).

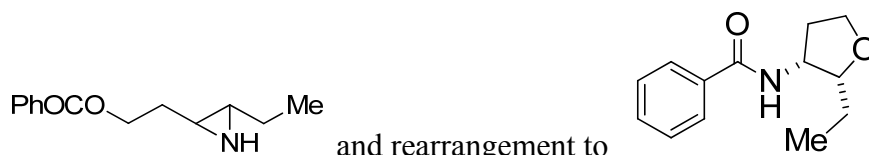

**10j**

**10jj**

**(*E*)-2-(3-Ethylaziridin-2-yl)ethyl benzoate and rearrangement product (*Z*)-*N*-(2-ethyltetrahydrofuran-3-yl)benzamide:** Following the general aziridination procedure, (*E*)-hex-3-en-1-yl benzoate(47) **9j** (0.102 g, 0.5 mmol), aminating agent **1a** (0.119 g, 0.6 mmol), and  $\text{Rh}_2(\text{esp})_2$  (3.8 mg, 5  $\mu\text{mol}$ ) were stirred in  $\text{CF}_3\text{CH}_2\text{OH}$  (5 mL) at rt for 1 h. Chromatographic purification of the crude product using a CombiFlash with 50–70% EtOAc/hexanes as eluent afforded the title aziridine as a reddish brown oil (95 mg, 86%) along with **10jj**, obtained as a yellow oil (5 mg, 4%), arising from O→N benzoate migration followed by  $\text{S}_{\text{N}}2$  addition of the oxygen to the now activated aziridine. **(*E*)-2-(3-ethylaziridin-2-yl)ethyl benzoate:** TLC:  $R_f \approx 0.3$  (EtOAc);  $^1\text{H NMR}$  (500 MHz,  $\text{CDCl}_3$ )  $\delta$  8.09–7.98 (m, 2H), 7.62–7.51 (m, 1H), 7.51–7.36 (m, 2H), 4.53–4.35 (m, 2H), 1.95–1.76 (m, 3H), 1.70 (td,  $J = 6.1, 2.5$  Hz, 1H), 1.56–1.29 (m, 2H), 0.98 (t,  $J = 7.4$  Hz, 3H);  $^{13}\text{C NMR}$  (126 MHz,  $\text{CDCl}_3$ )  $\delta$  166.51, 132.91, 130.21, 129.52, 128.34, 63.40, 39.07, 34.44, 33.47, 27.29, 11.61; HRMS (ESI<sup>+</sup>) Calcd. for  $[\text{C}_{13}\text{H}_{17}\text{NO}_2+\text{H}]^+$  220.1332, Found 220.1334; IR (neat) 3297, 3220, 2963, 1718  $\text{cm}^{-1}$ . **(*Z*)-*N*-(2-ethyltetrahydrofuran-3-yl)benzamide:** TLC:  $R_f \approx 0.5$  (EtOAc);  $^1\text{H NMR}$  (500 MHz,  $\text{CDCl}_3$ )  $\delta$  7.89–7.80 (m, 2H), 7.45–7.26 (m, 3H), 4.80 (ddd,  $J = 10.7, 9.2, 3.1$  Hz, 1H), 4.07 (td,  $J = 9.1, 5.5$  Hz, 1H), 3.88–3.80 (m, 2H), 1.95–1.68 (m, 2H), 1.68–1.40 (m, 3H), 1.05 (t,  $J = 7.3$  Hz, 3H);

$^{13}\text{C}$  NMR (126 MHz,  $\text{CDCl}_3$ ) 162.43, 131.26, 128.29, 128.11, 127.96, 80.29, 69.97, 60.63, 32.05, 23.74, 11.85; HRMS (ESI) Calcd. for  $[\text{C}_{13}\text{H}_{17}\text{NO}_2\text{-H}]^-$  218.1187; Found 218.1180; IR (neat) 3280, 2959, 2937, 1646  $\text{cm}^{-1}$ .

Structure confirmed by nOe: (see spectrum also)

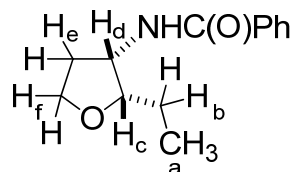

**10jj**

Irradiation (saturation) of proton d ( $\text{H}_d$ ) leads to the enhancement of the protons e ( $\text{H}_e$ ) and c ( $\text{H}_c$ ). Protons a and b ( $\text{H}_a$  and  $\text{H}_b$ ) of ethyl group are completely suppressed.

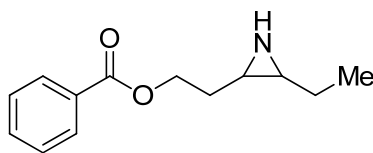

**10k**

**(Z)-2-(3-Ethylaziridin-2-yl)ethyl benzoate:** Following the general aziridination procedure, (*Z*)-hex-3-en-1-yl benzoate(47) **9k** (0.102 g, 0.5 mmol), aminating agent **1a** (0.119 g, 0.6 mmol), and  $\text{Rh}_2(\text{esp})_2$  (19 mg, 25  $\mu\text{mol}$ , 5 mol%) were stirred in  $\text{CF}_3\text{CH}_2\text{OH}$  (5 mL) at rt for 2 h. Chromatographic purification on a CombiFlash system using 70-90% EtOAc/hexanes as eluent afforded the title aziridine as a viscous oil (76 mg, 69%). TLC:  $R_f \approx 0.3$  (EtOAc);  $^1\text{H}$  NMR (400 MHz,  $\text{CDCl}_3$ )  $\delta$  8.06–8.03 (m, 2H), 7.57–7.53 (m, 1H), 7.45–7.41 (m, 2H), 4.47 (t,  $J = 6.4$  Hz, 2H), 2.22 (app q,  $J = 6.4$  Hz, 1H), 2.05 (app q,  $J = 6.7$  Hz, 1H), 2.01–1.92 (m, 2H), 1.82–1.73 (m, 1H), 1.45 (app qn,  $J = 7.3$  Hz, 2H), 1.03 (t,  $J = 7.4$  Hz, 3H);  $^{13}\text{C}$  NMR (101 MHz,  $\text{CDCl}_3$ )  $\delta$  166.59, 132.91, 130.25, 129.54, 128.34, 63.67, 36.38, 32.05, 28.10, 21.93, 12.04. HRMS (ESI $^+$ ) Calcd. for  $[\text{C}_{13}\text{H}_{17}\text{NO}_2\text{+H}]^+$  220.1332, Found 220.1336.

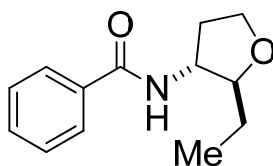

**10kk**

**(E)-N-(2-Ethyltetrahydrofuran-3-yl)benzamide:** Aminating agent **1a** (0.119 g, 0.6 mmol) was added to a stirring, rt solution of (*Z*)-hex-3-en-1-yl benzoate **9k** (0.102 g, 0.5 mmol) and

Rh<sub>2</sub>(esp)<sub>2</sub> (3.8 mg, 5 μmol) in CF<sub>3</sub>CH<sub>2</sub>OH (5 mL). After 16 h, the temperature was raised to 50 °C. Following another 9 h at this higher temperature, more Rh-catalyst (3.8 mg, 5 μmol, 1 mol%) was added. Thereafter, two more portions of catalyst (3.8 mg) were added every 24 h. The substrate was completely consumed after a total of 96 h. The reaction mixture was then cooled to rt, diluted with CH<sub>2</sub>Cl<sub>2</sub> (10 mL), and washed with 15% aqueous NaHCO<sub>3</sub> solution (5 mL). The layers were separated and the aqueous layer was extracted with fresh CH<sub>2</sub>Cl<sub>2</sub> (10 mL ×2). The combined organic extracts were washed with brine (5 mL), dried over Na<sub>2</sub>SO<sub>4</sub>, and concentrated. Chromatographic purification of the residue on a CombiFlash system to afforded the title tetrahydrofuran as a viscous liquid (92 mg, 84%). TLC: R<sub>f</sub> ≈ 0.3 (60% EtOAc/hexanes); <sup>1</sup>H NMR (500 MHz, CDCl<sub>3</sub>) δ 7.99–7.88 (m, 2H), 7.52–7.44 (m, 1H), 7.44–7.35 (m, 2H), 4.49 (ddd, *J* = 8.8, 6.4, 4.1 Hz, 1H), 3.92–3.74 (m, 3H), 2.86 (br s, 1H), 2.00–1.81 (m, 2H), 1.80–1.53 (m, 2H), 0.99 (t, *J* = 7.4 Hz, 3H); <sup>13</sup>C NMR (126 MHz, CDCl<sub>3</sub>) δ 162.68, 131.35, 128.26, 128.19, 127.79, 81.84, 73.24, 59.14, 38.40, 28.34, 9.82; HRMS (ESI<sup>+</sup>) Calcd. for [C<sub>13</sub>H<sub>17</sub>NO<sub>2</sub>+H]<sup>+</sup> 220.1332, Found 220.1325; IR (neat) 3286, 2961, 2933, 1644 cm<sup>-1</sup>.

Structure confirmed by nOe: (see spectrum also)

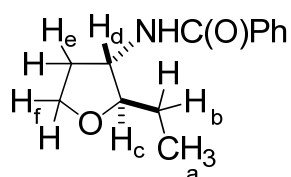

**10kk**

Irradiation (saturation) of proton d (H<sub>d</sub>) leads to the enhancement of the proton e (H<sub>e</sub>) and protons a and b (H<sub>a</sub> and H<sub>b</sub>) of ethyl group.

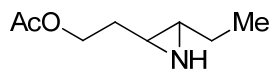

**10l**

**(*E*)-2-(3-Ethylaziridin-2-yl)ethyl acetate:** Following the general aziridination procedure, (*E*)-hex-3-en-1-yl acetate(48) **9l** (0.1 g, 0.7 mmol), aminating agent **1a** (0.167 g, 0.84 mmol), and Rh<sub>2</sub>(esp)<sub>2</sub> (5.3 mg, 7 μmol) were stirred in CF<sub>3</sub>CH<sub>2</sub>OH (7 mL) at rt for 1.5 h. Chromatographic purification on a CombiFlash system using 70-90% EtOAc/hexanes as eluent afforded the title aziridine as an oil (91 mg, 83%). TLC: R<sub>f</sub> ≈ 0.3 (90% EtOAc/hexanes); <sup>1</sup>H NMR (500 MHz, CDCl<sub>3</sub>) δ 4.17–4.13 (m, 2H), 2.02 (s, 3H), 1.76–1.58 (m, 4H), 1.49–1.40 (m, 1H), 1.38–1.30 (m, 1H), 0.96 (t, *J* = 7.4 Hz, 3H), 0.41 (br s, 1H); <sup>13</sup>C NMR (126 MHz, CDCl<sub>3</sub>) δ 171.06, 62.89,

39.00, 34.33, 33.22, 27.28, 20.96, 11.61; HRMS (ESI<sup>+</sup>) Calcd. for [C<sub>8</sub>H<sub>15</sub>NO<sub>2</sub>+H]<sup>+</sup> 158.1176, Found 158.1170; IR (neat) 3297, 3222, 2964, 1739 cm<sup>-1</sup>.

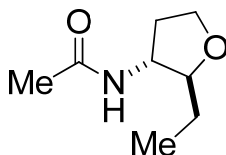

**10mm**

**(E)-N-(2-Ethyltetrahydrofuran-3-yl)acetamide:** A mixture of (*Z*)-hex-3-en-1-yl acetate(**48**) **9m** (0.124 g, 0.87 mmol), aminating agent **1a** (0.208 g, 1.04 mmol), and Rh<sub>2</sub>(esp)<sub>2</sub> (6.6 mg, 1 mol%) was stirred at rt in CF<sub>3</sub>CH<sub>2</sub>OH (8 mL). Three additional portions of catalyst (6.6 mg, 1 mol %) were added every 12 h thereafter for a total of 26.4 mg (35 μmol, 4 mol%). After a total of 51 h, the reaction mixture was quenched and chromatographically purified on a CombiFlash system using 80-100% EtOAc/hexanes as eluent to afford the title tetrahydrofuran as a viscous oil (84 mg, 61%) obtained as a mixture of diastereomers (>95:5). TLC: R<sub>f</sub> ≈ 0.3 (80% EtOAc/hexanes); <sup>1</sup>H NMR (400 MHz, CDCl<sub>3</sub>) (major diastereomer) δ 4.23 (ddd, *J* = 8.7, 6.7, 4.3 Hz, 1H), 3.77–3.67 (m, 2H), 3.58–3.50 (m, 1H), 3.19 (br s, 1H), 1.92 (s, 3H), 1.87–1.68 (m, 2H), 1.63–1.37 (m, 2H), 0.90 (t, *J* = 7.5 Hz, 3H); <sup>13</sup>C NMR (101 MHz, CDCl<sub>3</sub>) δ 163.98, 82.16, 72.85, 58.89, 38.28, 28.28, 14.04, 9.84; HRMS (ESI<sup>+</sup>) Calcd. for [C<sub>8</sub>H<sub>15</sub>NO<sub>2</sub>+H]<sup>+</sup> 158.1176, Found 158.1173; IR (neat) 3272, 2963, 2935, 1668 cm<sup>-1</sup>.

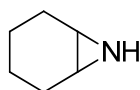

**10n**

**7-Azabicyclo[4.1.0]heptanes:(49)** Following the general aziridination procedure, cyclohexene **9n** (41 mg, 0.5 mmol), aminating agent **1a** (0.119 g, 0.6 mmol), and Rh<sub>2</sub>(esp)<sub>2</sub> (3.8 mg, 5 μmol) were stirred in CF<sub>3</sub>CH<sub>2</sub>OH (5 mL) at rt for 3 h. Chromatographic purification on a CombiFlash system using 60-70% EtOAc/hexanes as eluent to give the title aziridine as an oil (34 mg, 71%). TLC: R<sub>f</sub> ≈ 0.3 (80% EtOAc/hexanes); <sup>1</sup>H NMR (400 MHz, CDCl<sub>3</sub>) δ 2.15 (br s, 2H), 1.81–1.76 (m, 4H), 1.37–1.30 (m, 2H), 1.28–1.15 (m, 2H); <sup>13</sup>C NMR (101 MHz, CDCl<sub>3</sub>) 29.35, 24.51, 20.02.

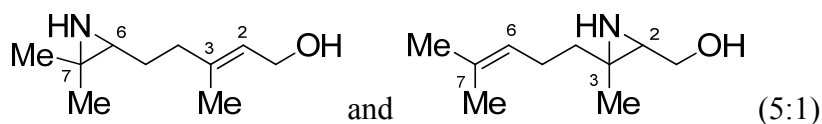

## 10o

**5-(3,3-Dimethylaziridin-2-yl)-3-methylpent-2(*E*)-en-1-ol:(50)** Following the general aziridination procedure, geranyl alcohol **9o** (46 mg, 0.3 mmol), aminating agent **1a** (66 mg, 0.33 mmol, 1.1 equiv), and Rh<sub>2</sub>(esp)<sub>2</sub> (2.3 mg, 3 μmol) were combined at 0 °C in CF<sub>3</sub>CH<sub>2</sub>OH (3 mL), then stirred at rt for 5 h. Chromatographic purification of the crude product over Florisil using 5-10% MeOH/CH<sub>2</sub>Cl<sub>2</sub> as eluent afforded the title aziridine (30 mg, 59%) as an oil accompanied by the 2,3-regioisomer (6 mg, 12%). **Major regioisomer.** TLC R<sub>f</sub> ≈ 0.3 (20% MeOH/CH<sub>2</sub>Cl<sub>2</sub>); <sup>1</sup>H NMR (500 MHz, CDCl<sub>3</sub>) δ 5.44–5.42 (m, 1H), 4.15 (d, *J* = 6.8 Hz, 2H), 2.21–2.05 (m, 2H), 1.75 (t, *J* = 6.6 Hz, 1H), 1.69 (s, 3H), 1.62–1.46 (m, 2H), 1.25 (s, 3H), 1.16 (s, 3H); <sup>13</sup>C NMR (126 MHz, CDCl<sub>3</sub>) δ 138.77, 123.93, 59.12, 43.09, 37.75, 35.65, 28.11, 27.51, 19.69, 16.33. **Minor regioisomer. 3-methyl-3-(4-methylpent-3-en-1-yl)aziridin-2 (*E*)-yl)methanol:** TLC: R<sub>f</sub> ≈ 0.4 (20% MeOH/CH<sub>2</sub>Cl<sub>2</sub>); <sup>1</sup>H NMR (500 MHz, CDCl<sub>3</sub>) δ 5.12–5.08 (m, 1H), 3.74 (dd, *J* = 11.5, 5.4 Hz, 1H), 3.55 (dd, *J* = 11.5, 7.0 Hz, 1H), 2.19–2.07 (m, 3H), 1.70 (s, 3H), 1.63 (s, 3H), 1.63–1.57 (m, 1H), 1.35 (dt, *J* = 13.7, 8.1 Hz, 1H), 1.19 (s, 3H); <sup>13</sup>C NMR (101 MHz, CDCl<sub>3</sub>) δ 132.22, 123.44, 61.48, 42.68, 41.52, 39.27, 25.69, 24.81, 17.67, 17.16.

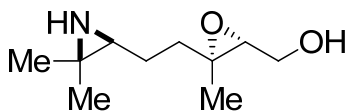

## 10p

**((2*R*,3*R*)-3-(2-(3,3-dimethylaziridin-2-yl)ethyl)-3-methyloxiran-2-yl)methanol:** Following the general aziridination procedure, ((2*R*,3*R*)-3-methyl-3-(4-methylpent-3-en-1-yl)oxiran-2-yl)methanol(*51*) **9p** (85 mg, 0.5 mmol), aminating agent **1a** (0.119 g, 0.6 mmol), and Rh<sub>2</sub>(esp)<sub>2</sub> (3.8mg, 5 μmol) were stirred in CF<sub>3</sub>CH<sub>2</sub>OH (5 mL) at 0-5 °C for 4 h. Chromatographic purification on a CombiFlash system using 10-20% MeOH/CH<sub>2</sub>Cl<sub>2</sub> as eluent to give the title aziridine (1:1 diastereomers) as an oil (78 mg, 84%). TLC: R<sub>f</sub> ≈ 0.3 (10% MeOH/CH<sub>2</sub>Cl<sub>2</sub>); <sup>1</sup>H NMR (400 MHz, CDCl<sub>3</sub>) δ 3.74–3.61 (m, 2H), 2.94 (app q, *J* = 5.4 Hz, 1H), 2.25 (br s, 2H), 1.83–1.68 (m, 2H), 1.65–1.35 (m, 3H), 1.28 (s, 1.5H), 1.27 (s, 1.5H), 1.23 (s, 3H), 1.14 (s, 1.5H), 1.13 (s, 1.5 H); <sup>13</sup>C NMR (101 MHz, CDCl<sub>3</sub>) δ 63.06, 62.69, 60.71, 60.67, 60.65, 60.64, 43.20, 42.97, 36.95, 36.53, 36.07, 35.92, 27.34, 27.28, 25.39, 25.30, 19.46, 19.39, 16.95, 16.57; HRMS (ESI<sup>+</sup>) Calcd. for [C<sub>10</sub>H<sub>19</sub>NO<sub>2</sub>+H]<sup>+</sup> 186.1489, Found 186.1490.

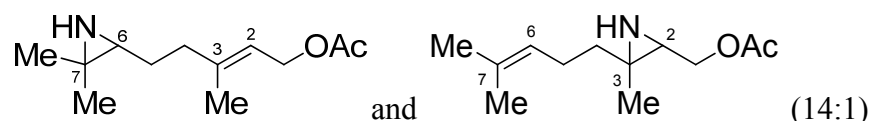

**10q**

**5-(3,3-Dimethylaziridin-2-yl)-3-methylpent-2(*E*)-en-1-yl acetate:** Following the general aziridination procedure, geranyl acetate **9q** (59 mg, 0.3 mmol), aminating agent **1a** (72 mg, 0.36 mmol), and  $\text{Rh}_2(\text{esp})_2$  (2.3 mg, 3  $\mu\text{mol}$ ) were stirred in  $\text{CF}_3\text{CH}_2\text{OH}$  (3 mL) at rt for 3 h. Chromatographic purification of the crude product by  $\text{Et}_3\text{N}$  basified preparative TLC using 80% EtOAc/hexanes as eluent afforded the title aziridine as an oil (48 mg, 76%) and its 2,3-regioisomer (3.5 mg, 5%). **6,7-Regioisomer.** TLC:  $R_f \approx 0.3$  (80% EtOAc/hexanes);  $^1\text{H}$  NMR (500 MHz,  $\text{CDCl}_3$ )  $\delta$  5.35 (tq,  $J = 7.1, 1.4$  Hz, 1H), 4.56 (d,  $J = 7.2$  Hz, 2H), 2.24–2.05 (m, 2H), 2.03 (s, 3H), 1.74 (t,  $J = 6.6$  Hz, 1H), 1.69 (s, 3H), 1.60–1.51 (m, 2H), 1.24 (s, 3H), 1.14 (s, 3H), 1.01 (br s, 1H);  $^{13}\text{C}$  NMR (126 MHz,  $\text{CDCl}_3$ )  $\delta$  171.08, 141.76, 118.58, 61.29, 43.02, 37.68, 35.86, 27.93, 27.40, 21.05, 19.62, 16.46; HRMS ( $\text{ESI}^+$ ) Calcd. for  $[\text{C}_{12}\text{H}_{21}\text{NO}_2+\text{H}]^+$  212.1645, Found 212.1651. **2,3-Regioisomer.** TLC:  $R_f \approx 0.4$  (80% EtOAc/hexanes);  $^1\text{H}$  NMR (500 MHz,  $\text{CDCl}_3$ )  $\delta$  5.09–5.05 (m, 1H), 4.16–4.00 (m, 2H), 2.16–1.99 (m, 3H), 2.06 (s, 3H), 1.66 (s, 3H), 1.60 (s, 3H), 1.60–1.54 (m, 1H), 1.31 (ddd,  $J = 13.6, 9.2, 6.8$  Hz, 1H), 1.17 (s, 3H), 0.46 (br s, 1H);  $^{13}\text{C}$  NMR (101 MHz,  $\text{CDCl}_3$ )  $\delta$  171.01, 132.11, 123.33, 64.89, 41.31, 39.28, 38.67, 25.65, 24.72, 20.90, 17.61, 17.41; HRMS ( $\text{ESI}^+$ ) Calcd. for  $[\text{C}_{12}\text{H}_{21}\text{NO}_2+\text{Na}]^+$  234.1465, Found 234.1456.

When the above aziridination was repeated using 1.18 gram (6.0 mmol) of geranyl acetate, the yield of 6,7-regioisomer was 72% and 2,3-regioisomer was 5%.

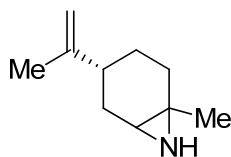

**10r**

**4(*R*)-1-Methyl-4-(prop-1-en-2-yl)-7-azabicyclo[4.1.0]heptanes:(52)** (*R*)-(+)-Limonene **9r** (68 mg, 0.5 mmol), aminating agent **1a** (0.119 g, 0.6 mmol), and  $\text{Rh}_2(\text{esp})_2$  (3.8 mg, 5  $\mu\text{mol}$ ) were combined at 0  $^\circ\text{C}$  in  $\text{CH}_3\text{CF}_2\text{OH}$  (5 mL), then stirred at rt for 12 h. Chromatographic purification on a CombiFlash system using 60-70% EtOAc/hexanes as eluent gave the title aziridine as an oil (54 mg, 72%) obtained as a 1:1 mixture of diastereomers. TLC:  $R_f \approx 0.3$  (80% EtOAc/hexanes);



$^1\text{H}$  NMR (400 MHz,  $\text{CDCl}_3$ ) of 1:1 mixture of diastereomers:  $\delta$  4.68–4.66 (m, 1H), 4.65–4.63 (m, 1H), 4.62–4.60 (m, 2H), 2.09–2.02 (m, 1H), 2.01–1.96 (m, 5H), 1.93–1.73 (m, 3H), 1.67–1.63 (m, 3H), 1.66 (s, 3H), 1.65 (s, 3H), 1.51–1.37 (m, 3H), 1.26 (s, 3H), 1.24 (s, 3H), 1.20–1.11 (m, 1H);  $^{13}\text{C}$  NMR (101 MHz,  $\text{CDCl}_3$ )  $\delta$  149.75, 149.43, 108.81, 108.70, 41.52, 39.25, 37.65, 36.61, 35.22, 34.53, 30.98, 30.55, 30.45, 29.52, 27.47, 26.50, 26.37, 24.86, 21.08, 20.38; HRMS (ESI $^+$ ) Calcd. for  $[\text{C}_{10}\text{H}_{17}\text{NO}+\text{H}]^+$  152.1434, Found 152.1436.

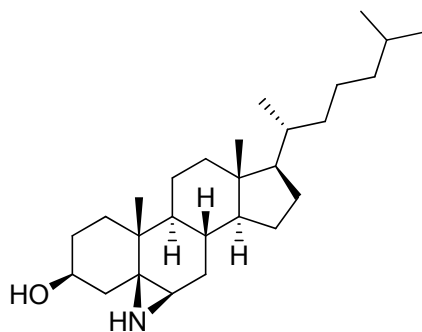

**10s**

**5 $\beta$ ,6 $\beta$ -Aziridinylcholestan-3- $\beta$ -ol:(53)** Following the general aziridination procedure, cholesterol **9s** (0.193 g, 0.5 mmol), aminating agent **1a** (0.119 g, 0.6 mmol), and  $\text{Rh}_2(\text{esp})_2$  (3.8 mg, 5  $\mu\text{mol}$ ) were stirred in a mixture of  $\text{CH}_3\text{CF}_2\text{OH}$  (3 mL) and THF (2 mL) at rt. After 24 h, another portion of catalyst (3.8 mg, 5  $\mu\text{mol}$ , 1 mol%) and aminating agent (0.1 g, 0.5 mmol, 1.0 equiv) were added and the stirring was continued for an additional 24 h. Chromatographic purification on a CombiFlash system using 1-2% MeOH/ $\text{CH}_2\text{Cl}_2$  as eluent afforded the title aziridine as a solid (0.14 g, 71%), mp 130-132  $^\circ\text{C}$ . TLC:  $R_f \approx 0.3$  (10% MeOH/ $\text{CH}_2\text{Cl}_2$ );  $^1\text{H}$  NMR (400 MHz,  $\text{CDCl}_3$ , mixture of invertomers)  $\delta$  3.79–3.64 (m, 1H), 2.18 (dd,  $J = 12.9, 11.3$  Hz, 0.5H), 2.11 (br s, 0.5H), 1.99 (dd,  $J = 12.8, 11.0$  Hz, 0.5H), 1.91–1.85 (m, 4H), 1.80–1.70 (m, 2H), 1.62–1.59 (m, 1H), 1.50–1.47 (m, 2H), 1.34–1.26 (m, 9H), 1.09–1.06 (m, 6H), 1.03 (s, 3H), 0.93 (s, 3H), 0.85–0.80 (m, 11H), 0.60 (s, 1.5 H), 0.56 (s, 1.5H);  $^{13}\text{C}$  NMR (101 MHz,  $\text{CDCl}_3$ )  $\delta$  68.97, 68.64, 57.08, 56.52, 56.21, 55.87, 51.13, 45.92, 45.23, 42.72, 42.65, 42.38, 42.28, 42.26, 42.19, 39.94, 39.44, 37.37, 36.93, 36.10, 36.08, 35.74, 35.68, 34.34, 34.11, 32.48, 32.31, 31.42, 30.96, 30.19, 29.92, 28.69, 28.14, 28.06, 27.95, 27.94, 24.14, 23.97, 23.84, 23.78, 22.78, 22.52, 22.23, 20.87, 18.66, 18.63, 18.60, 16.29, 11.89, 11.87; HRMS (ESI $^+$ ) Calcd. for  $[\text{C}_{27}\text{H}_{47}\text{NO}+\text{H}]^+$  402.3730, Found 402.3733.

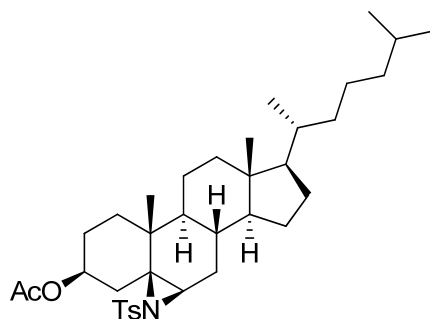

**10ss**

**(3*S*,4*aS*,5*aS*,6*aS*,6*bS*,9*R*,9*aR*,11*aS*,11*bR*)-9*a*,11*b*-dimethyl-9-((*R*)-6-methylheptan-2-yl)-5-tosylhexadecahydro-1*H*-cyclopenta[1,2]phenanthro[8*a*,9-*b*]azirin-3-ylacetate:(54)**

Cholesterol aziridine **10s** (80 mg, 0.2 mmol), tosyl chloride (46 mg, 0.24 mmol), acetic anhydride (0.4 mL) and pyridine (1 mL) were reacted following the literature described procedure.<sup>(54)</sup> Chromatographic separation of the crude product using EtOAc/hexanes (5-10%) as eluent furnished the title compound as a white solid (38 mg, 32%), m.p. 157-158 °C, lit. m.p. 148-150 °C. TLC:  $R_f \approx 0.7$  (30% EtOAc/hexanes);  $^1\text{H}$  NMR (400 MHz,  $\text{CDCl}_3$ )  $\delta$  7.78 (d,  $J = 8.3$  Hz, 2H),  $\delta$  7.28 (d,  $J = 8.1$  Hz, 2H), 4.95-4.88 (1H, m), 3.15 (br s, 1H), 2.53 (dd,  $J = 13.3$ , 11.0 Hz, 1H), 2.43 (s, 3H), 2.29 (dd,  $J = 13.3$ , 5.9 Hz, 1H), 2.04 (s, 3H), 2.00–1.87 (m, 1H), 1.90–1.67 (m, 4H), 1.60–0.91 (m, 19H), 1.05 (s, 3H), 0.91–0.73 (m, 10H), 0.73–0.62 (m, 1H), 0.57 (s, 3H);  $^{13}\text{C}$  NMR (101 MHz,  $\text{CDCl}_3$ )  $\delta$  170.52, 143.39, 139.05, 129.33, 126.83, 70.50, 57.02, 56.03, 55.94, 50.07, 48.30, 42.16, 39.68, 39.45, 36.16, 36.05, 35.68, 34.17, 32.53, 30.46, 29.89, 28.07, 27.98, 26.57, 24.09, 23.75, 22.79, 22.54, 22.03, 21.58, 21.32, 20.63, 18.62, 11.71.

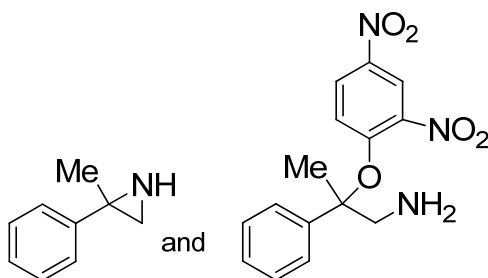

**12a and 12aa**

**2-Methyl-2-phenylaziridine:(55)** Following the general aziridination procedure,  $\alpha$ -methylstyrene **11a** (59 mg, 0.5 mmol), aminating agent **1a** (0.119 g, 0.6 mmol), and  $\text{Rh}_2(\text{esp})_2$  (3.8 mg, 5  $\mu\text{mol}$ ) were stirred in  $\text{CF}_3\text{CH}_2\text{OH}$  (5 mL) at 0 °C for 2 h. Chromatographic purification by  $\text{Et}_3\text{N}$  basified preparative TLC using 60% EtOAc/hexanes as eluent afforded the

title aziridine as an oil (42 mg, 64%) accompanied by aminoaryloxyated product **12aa** (11 mg, 7%) as a sticky solid. **Aziridine**: TLC:  $R_f \approx 0.3$  (60% EtOAc/hexanes);  $^1\text{H}$  NMR (500 MHz,  $\text{CDCl}_3$ )  $\delta$  7.40–7.23 (m, 5H), 1.98 (s, 1H), 1.97 (s, 1H), 1.63 (s, 3H), 1.01 (br s, 1H);  $^{13}\text{C}$  NMR (126 MHz,  $\text{CDCl}_3$ )  $\delta$  143.60, 128.39, 126.82, 126.17, 36.97, 35.01, 25.17; HRMS (ESI<sup>+</sup>) Calcd. for  $[\text{C}_9\text{H}_{11}\text{N}+\text{H}]^+$  134.0964, Found 134.0960. **2-(2,4-Dinitrophenoxy)-2-phenylpropan-1-amine**: TLC:  $R_f \approx 0.7$  (60% EtOAc/hexanes);  $^1\text{H}$  NMR (400 MHz,  $\text{CDCl}_3$ )  $\delta$  9.01 (d,  $J = 2.7$  Hz, 1H), 8.79 (t,  $J = 5.3$  Hz, 1H), 8.13 (dd,  $J = 9.6, 2.7$  Hz, 1H), 7.59–7.45 (m, 2H), 7.44–7.36 (m, 2H), 7.35–7.19 (m, 1H), 6.85 (d,  $J = 9.6$  Hz, 1H), 3.70–3.57 (m, 2H), 1.75 (s, 3H);  $^{13}\text{C}$  NMR (101 MHz,  $\text{CDCl}_3$ )  $\delta$  148.51, 144.19, 135.83, 130.31, 130.08, 128.79, 127.91, 124.72, 124.18, 114.21, 74.00, 54.68, 27.79; HRMS (ESI<sup>-</sup>) Calcd. for  $[\text{C}_{15}\text{H}_{15}\text{N}_3\text{O}_5-\text{H}]^-$  316.0939, Found 316.0929.

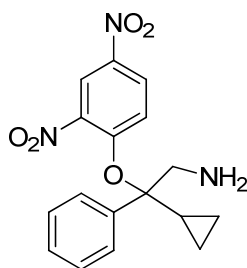

**12b**

**2-Cyclopropyl-2-(2,4-dinitrophenoxy)-2-phenylethanamine**:  $\text{Rh}_2(\text{esp})_2$  (3.8 mg, 5  $\mu\text{mol}$ ) and aminating agent **1a** (0.119 g, 0.6 mmol) were added successively to a stirring solution of (1-cyclopropylvinyl)benzene(56) **11b** (72 mg, 0.5 mmol) in  $\text{CF}_3\text{CH}_2\text{OH}$  (5 mL) at 0 °C. After 2 h, the reaction mixture was diluted with  $\text{CH}_2\text{Cl}_2$  (10 mL) followed by 15% aqueous  $\text{NaHCO}_3$  solution (5 mL). The layers were separated and the aqueous layer was extracted with  $\text{CH}_2\text{Cl}_2$  (10 mL  $\times$  2). The combined organic layers were washed with brine (5 mL), dried over  $\text{Na}_2\text{SO}_4$ , and concentrated. The residue was purified on a CombiFlash system over  $\text{SiO}_2$  using 15-20% EtOAc/hexanes to furnish the title amine as an oil (0.125 g, 73%). TLC:  $R_f \approx 0.5$  (30% EtOAc/hexanes);  $^1\text{H}$  NMR (500 MHz,  $\text{CDCl}_3$ )  $\delta$  9.06 (d,  $J = 2.7$  Hz, 1H), 8.87 (t,  $J = 4.5$  Hz, 1H), 8.19 (dd,  $J = 9.5, 2.7$  Hz, 1H), 7.64–7.50 (m, 2H), 7.44–7.39 (m, 2H), 7.36–7.31 (m, 1H), 6.92 (d,  $J = 9.6$  Hz, 1H), 3.88–3.69 (m, 2H), 2.03 (br s, 1H), 1.52–1.46 (m, 1H), 0.76–0.62 (m, 2H), 0.61–0.49 (m, 1H), 0.39–0.33 (m, 1H);  $^{13}\text{C}$  NMR (126 MHz,  $\text{CDCl}_3$ )  $\delta$  148.52, 143.10, 135.83, 130.34, 130.15, 128.72, 128.10, 125.38, 124.27, 114.18, 74.44, 54.20, 19.24, 1.52, 0.64; HRMS (ESI<sup>+</sup>) Calcd. for  $[\text{C}_{17}\text{H}_{17}\text{N}_3\text{O}_5+\text{Na}]^+$  366.1060, Found 366.1052.

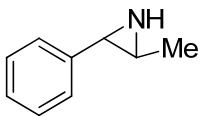

**12c**

**(E)-2-Methyl-3-phenylaziridine:(57)** Following the general aziridination procedure, *trans*- $\beta$ -methylstyrene **11c** (59 mg, 0.5 mmol), aminating agent **1a** (0.119 g, 0.6 mmol), and  $\text{Rh}_2(\text{esp})_2$  (3.8 mg, 5  $\mu\text{mol}$ ) were stirred in  $\text{CF}_3\text{CH}_2\text{OH}$  (5 mL) at  $-10\text{ }^\circ\text{C}$  for 14 h. Chromatographic purification by  $\text{Et}_3\text{N}$  basified preparative TLC using 60% EtOAc/hexanes as eluent afforded the title aziridine as an oil (35 mg, 53%). TLC:  $R_f \approx 0.3$  (50% EtOAc/hexanes);  $^1\text{H}$  NMR (500 MHz,  $\text{CDCl}_3$ )  $\delta$  7.40–7.13 (m, 5H), 2.68 (d,  $J = 2.9$  Hz, 1H), 2.18–2.14 (m, 1H), 1.38 (d,  $J = 5.5$  Hz, 3H), 1.28 (br s, 1H);  $^{13}\text{C}$  NMR (126 MHz,  $\text{CDCl}_3$ )  $\delta$  140.37, 128.48, 126.98, 125.52, 40.46, 37.15, 19.64.

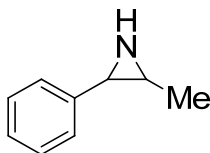

**12d**

**(Z)-2-Methyl-3-phenylaziridine:(57)** Following the general aziridination procedure, *cis*- $\beta$ -methylstyrene **11d** (59 mg, 0.5 mmol), aminating agent **1a** (0.119 g, 0.6 mmol), and  $\text{Rh}_2(\text{esp})_2$  (3.8 mg, 5  $\mu\text{mol}$ , 1 mol%) were stirred in  $\text{CF}_3\text{CH}_2\text{OH}$  (5 mL) at  $-10\text{ }^\circ\text{C}$ . Two additional portions of catalysts (3.8 mg) were added at 24 h intervals. After a total of 68 h, the reaction was subjected to extractive isolation and the resultant crude material was chromatographically purified by  $\text{Et}_3\text{N}$  basified preparative TLC using 60% EtOAc/hexanes as eluent to give the title aziridine as an oil (51 mg, 76%). TLC:  $R_f \approx 0.4$  (60% EtOAc/hexanes);  $^1\text{H}$  NMR (500 MHz,  $\text{CDCl}_3$ )  $\delta$  7.46–7.19 (m, 5H), 3.26 (d,  $J = 6.6$  Hz, 1H), 2.42 (app qn,  $J = 5.8$  Hz, 1H), 1.46 (br s, 1H), 0.93 (d,  $J = 5.8$  Hz, 3H);  $^{13}\text{C}$  NMR (126 MHz,  $\text{CDCl}_3$ )  $\delta$  137.53, 127.92, 127.80, 126.65, 37.17, 32.24, 13.62.

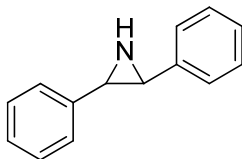

**12e**

**(E)-2,3-Diphenylaziridine:(58)** Following the general aziridination procedure, *trans*-stilbene **11e** (90 mg, 0.5 mmol), aminating agent **1a** (0.109 g, 0.55 mmol, 1.1 equiv), and Rh<sub>2</sub>(esp)<sub>2</sub> (3.8 mg, 5 μmol) were stirred in a mixture of CF<sub>3</sub>CH<sub>2</sub>OH (3 mL) and THF (2 mL) at rt. After 16 h, another portion of catalyst (5 μmol, 3.8 mg) and aminating agent (0.02 g, 0.1 mmol, 0.2 equiv) was added and the stirring was continued for another an additional 7 h. Chromatographic purification on a CombiFlash system over <sup>t</sup>Bu<sub>3</sub>N basified SiO<sub>2</sub> using 10-15% EtOAc/hexanes to afford the title aziridine as an oil (49 mg, 51%). TLC: R<sub>f</sub> ≈ 0.4 (30% EtOAc/hexanes); <sup>1</sup>H NMR (500 MHz, CDCl<sub>3</sub>) δ 7.66–6.82 (m, 10H), 3.12 (br s, 2H), 1.50 (br s, 1H); <sup>13</sup>C NMR (126 MHz, CDCl<sub>3</sub>) δ 139.60, 128.62, 127.32, 125.47, 43.70.

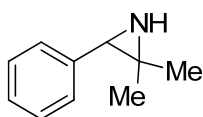

**12f**

**2,2-Dimethyl-3-phenylaziridine:(59)** Following the general procedure, (2-methylprop-1-en-1-yl)benzene **11f** (0.132 g, 1.0 mmol), aminating agent **1a** (0.219 g, 1.1 mmol, 1.1 equiv), and Rh<sub>2</sub>(esp)<sub>2</sub> (7.6 mg, 10 μmol) were stirred in CF<sub>3</sub>CH<sub>2</sub>OH (10 mL) at rt for 3 h. Chromatographic purification by flash column chromatography over Florisil<sup>®</sup> using 10-25% EtOAc/hexanes as eluent afforded the title aziridine as an oil (0.135 g, 92%). TLC: R<sub>f</sub> ≈ 0.4 (50% EtOAc/hexanes); <sup>1</sup>H NMR (500 MHz, CDCl<sub>3</sub>) δ 7.34–7.30 (m, 4H), 7.28–7.17 (m, 1H), 3.05 (s, 1H), 1.46 (s, 3H), 0.94 (s, 3H), 0.65 (br s, 1H); <sup>13</sup>C NMR (101 MHz, CDCl<sub>3</sub>) 138.43, 127.91, 127.50, 126.51, 45.39, 38.49, 27.51, 19.43; HRMS (ESI<sup>+</sup>) Calcd. for [C<sub>10</sub>H<sub>13</sub>N+H]<sup>+</sup> 148.1121, Found 148.1122.

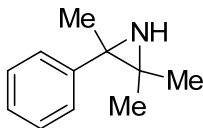

**12g**

**2,2,3-trimethyl-3-phenylaziridine:** Following the general procedure, (3-methylbut-2-en-2-yl)benzene\* **11g** (50 mg, 0.34 mmol), aminating agent **1a** (82 mg, 0.41 mmol), and Rh<sub>2</sub>(esp)<sub>2</sub> (2.6 mg, 3.4 μmol) were stirred in CF<sub>3</sub>CH<sub>2</sub>OH (3 mL) at rt for 1 h. Chromatographic purification by prep TLC afforded the title aziridine as an oil (38 mg, 70%) (Both the proton and carbon NMR shows some impurity that is hard to get rid of). TLC: R<sub>f</sub> ≈ 0.2 (50% EtOAc/hexanes); <sup>1</sup>H NMR (400 MHz, CDCl<sub>3</sub>) δ 7.37–7.14 (m, 5H), 1.54 (s, 3H), 1.40 (s, 3H), 1.28 (br s, 1H), 0.88 (s,

3H);  $^{13}\text{C}$  NMR (101 MHz,  $\text{CDCl}_3$ ) 144.03, 128.13, 127.17, 126.35, 47.41, 41.02, 23.99, 23.56, 21.89; HRMS ( $\text{ESI}^+$ ) Calcd. for  $[\text{C}_{11}\text{H}_{15}\text{N}+\text{H}]^+$  162.1277, Found 162.1280.

\* The starting olefin bought from Aldrich contains significant amount of impurities (see spectrum) which is carried through the aziridination. Repeated column chromatography could not remove the impurities completely. Conversion of the aziridine **12g** to acetate **12gg** afforded pure *N*-protected aziridine.

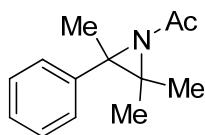

**12gg**

**1-(2,2,3-trimethyl-3-phenylaziridin-1-yl)ethanone:** 2,2,3-trimethyl-3-phenylaziridine **12g** (15 mg, 93  $\mu\text{mol}$ ), acetic anhydride (17  $\mu\text{L}$ , 0.13 mmol), pyridine (11  $\mu\text{L}$ , 0.13 mmol) were reacted in  $\text{CH}_2\text{Cl}_2$  (1 mL) at rt for 3 h. Evaporation of volatiles and chromatographic purification by prep TLC using 40% EtOAc/hexanes as eluent afforded the title *N*-protected aziridine as a light yellow oil (18 mg, 90%). TLC:  $R_f \approx 0.4$  (40% EtOAc/hexanes);  $^1\text{H}$  NMR (400 MHz,  $\text{CDCl}_3$ )  $\delta$  7.36–7.14 (m, 5H), 2.13 (s, 3H), 1.65 (s, 3H), 1.49 (s, 3H), 0.92 (s, 3H);  $^{13}\text{C}$  NMR (101 MHz,  $\text{CDCl}_3$ )  $\delta$  177.74, 141.40, 128.24, 126.99, 126.78, 50.91, 46.62, 24.99, 22.43, 19.47, 18.73.

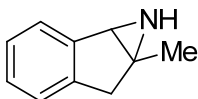

**12h**

**6a-Methyl-1,1a,6,6a-tetrahydroindeno[1,2-b]azirine:** 2-Methylindene **11h** (0.130 g, 1.0 mmol), aminating agent **1a** (0.219 g, 1.1 mmol, 1.1 equiv), and  $\text{Rh}_2(\text{esp})_2$  (7.6 mg, 10  $\mu\text{mol}$ ) were combined in  $\text{CF}_3\text{CH}_2\text{OH}$  (10 mL) at 0  $^\circ\text{C}$  with stirring. The mixture was then warmed to 5  $^\circ\text{C}$  and maintained at this temperature for 2.5 h. Chromatographic purification via flash column chromatography over Florisil<sup>®</sup> using 20-30% EtOAc/hexanes as eluent afforded the title aziridine as a pale yellow oil (20 mg, 14%). TLC:  $R_f \approx 0.4$  (50% EtOAc/hexanes);  $^1\text{H}$  NMR (500 MHz,  $\text{CDCl}_3$ )  $\delta$  7.38 (dd,  $J = 6.6, 1.8$  Hz, 1H), 7.27–7.07 (m, 3H), 3.24–2.91 (m, 3H), 1.57 (s, 3H); HRMS ( $\text{ESI}^+$ ) Calcd. for  $[\text{C}_{10}\text{H}_{11}\text{N}+\text{H}]^+$  146.0964, Found 146.0964

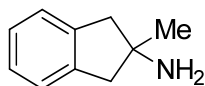

**12hh**

**2-Methyl-2,3-dihydro-1H-inden-2-amine:(60)** 2-Methylindene **11h** (0.130 g, 1.0 mmol), aminating agent **1a** (0.239 g, 1.2 mmol), and Rh<sub>2</sub>(esp)<sub>2</sub> (7.6 mg, 10 μmol) in CF<sub>3</sub>CH<sub>2</sub>OH (10 mL) reacted exactly as above. The crude product (0.143 g), without further purification, was subjected to catalytic hydrogenation over 10% Pd/C (10 mg) in dry MeOH (5 mL) at 1 atm hydrogen pressure (balloon). After 15 h, the reaction mixture was passed through a small plug of cotton. The plug was washed with MeOH (3 mL) and the solvent was evaporated. The residue was purified by CombiFlash column chromatography over SiO<sub>2</sub> using 10-20% MeOH/CH<sub>2</sub>Cl<sub>2</sub> as eluent to give the title amine as a pale yellow solid (88 mg, 60%), decomposes (or charring) >211 °C. TLC: R<sub>f</sub> ≈ 0.3 (20% MeOH/CH<sub>2</sub>Cl<sub>2</sub>); <sup>1</sup>H NMR (500 MHz, CDCl<sub>3</sub>) δ 7.27–7.11 (m, 4H), 3.40 (d, *J* = 15.9 Hz, 2H), 3.07 (d, *J* = 15.8 Hz, 2H), 1.62 (s, 3H); <sup>13</sup>C NMR (126 MHz, CDCl<sub>3</sub>) δ 139.24, 127.29, 124.97, 61.49, 44.66, 24.93; HRMS (ESI<sup>+</sup>) Calcd. for [C<sub>10</sub>H<sub>13</sub>N+H]<sup>+</sup> 148.1121, Found 148.1116.

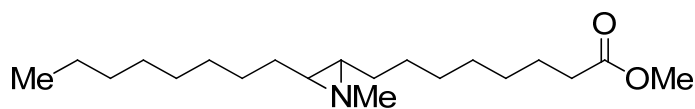

**13a**

**Methyl (*E*)-8-(1-methyl-3-octylaziridin-2-yl)octanoate:** Following the general aziridination procedure, methyl elaidate **9h** (59 mg, 0.2 mmol), *N*-methylaminating agent(*6I*) **1b** (51 mg, 0.24 mmol), and Rh<sub>2</sub>(esp)<sub>2</sub> (1.5 mg, 2 μmol) were stirred in CF<sub>3</sub>CH<sub>2</sub>OH (2 mL) at rt. After 2 h, another portion of catalyst (0.8 mg, 0.5 mol%) and aminating agent (9 mg, 0.04 mmol, 0.2 equiv) were added and the stirring was continued for an additional 2 h. Chromatographic purification on a CombiFlash system over SiO<sub>2</sub> gave the title aziridine as an oil (51 mg, 78%). TLC: R<sub>f</sub> ≈ 0.3 (50% EtOAc/hexanes); <sup>1</sup>H NMR (400 MHz, CDCl<sub>3</sub>; 1:1 mixture of invertomers) δ 3.62 (s, 3H), 2.33 (s, 3H), 2.27 (t, *J* = 7.5 Hz, 1H), 2.26 (t, *J* = 7.5 Hz, 1H), 1.65–1.50 (m, 4H), 1.45–1.11 (m, 23H), 1.04–0.91 (m, 1H), 0.84 (t, *J* = 6.8 Hz, 1.5H), 0.83 (t, *J* = 6.8 Hz, 1.5H); <sup>13</sup>C NMR (101 MHz, CDCl<sub>3</sub>) δ 174.20, 174.17, 51.38, 51.36, 51.34, 47.08, 47.03, 42.90, 42.85, 38.78, 34.03, 34.01, 33.22, 33.18, 31.83, 29.57, 29.52, 29.49, 29.46, 29.30, 29.24, 29.20, 29.14, 29.04, 28.47, 28.40, 27.48, 27.39, 25.60, 25.58, 24.88, 24.87, 22.62, 14.05; HRMS (ESI<sup>+</sup>) Calcd. for [C<sub>20</sub>H<sub>39</sub>NO<sub>2</sub>+H]<sup>+</sup> 326.3054, Found 326.3049.

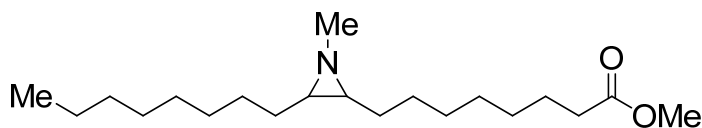

### 13b

**Methyl (Z)-8-(1-methyl-3-octylaziridin-2-yl)octanoate:** Following the general aziridination procedure, methyl oleate **7** (89 mg, 0.3 mmol), *N*-methylaminating agent **1b** (77 mg, 0.36 mmol), and Rh<sub>2</sub>(esp)<sub>2</sub> (2.3 mg, 3 μmol) were stirred in CF<sub>3</sub>CH<sub>2</sub>OH (3 mL) at rt for 2 h. Thereafter, two more portions of catalyst (1.1 mg, 0.5 mol%) and aminating agent (13 mg, 0.06 mmol, 0.2 equiv) were added after every 2 h and stirred for a total of 6 h. Chromatographic purification on a CombiFlash system over SiO<sub>2</sub> to give the title aziridine as an oil (78 mg, 80%). TLC: R<sub>f</sub> ≈ 0.5 (50% EtOAc/hexanes); <sup>1</sup>H NMR (500 MHz, CDCl<sub>3</sub>) δ 3.64 (s, 3H), 2.31 (s, 3H), 2.27 (t, *J* = 7.6 Hz, 2H), 1.64–1.54 (m, 2H), 1.46–1.19 (m, 24H), 1.19–1.14 (m, 2H), 0.85 (t, *J* = 6.9 Hz, 3H); <sup>13</sup>C NMR (126 MHz, CDCl<sub>3</sub>) δ 174.28, 51.42, 48.12, 45.46, 45.41, 34.05, 31.86, 29.62, 29.61, 29.39, 29.27, 29.26, 29.07, 28.22, 28.18, 28.12, 28.05, 24.90, 22.67, 14.11; HRMS (ESI<sup>+</sup>) Calcd. for [C<sub>20</sub>H<sub>39</sub>NO<sub>2</sub>+Na]<sup>+</sup> 348.2873, Found 348.2863.

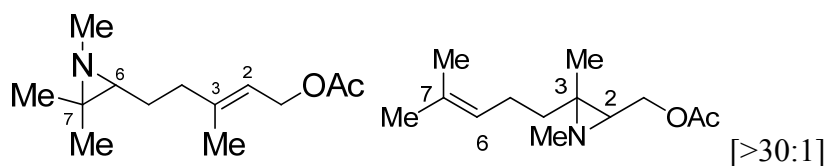

### 13c

**(E)-3-Methyl-5-(1,3,3-trimethylaziridin-2-yl)pent-2-en-1-yl acetate:** Following the general aziridination procedure, geranyl acetate **9q** (98 mg, 0.5 mmol), *N*-methylaminating agent **1b** (0.128 g, 0.6 mmol), and Rh<sub>2</sub>(esp)<sub>2</sub> (3.8 mg, 5 μmol) were stirred in CF<sub>3</sub>CH<sub>2</sub>OH (5 mL) at rt. After 2 h, another portion of catalyst (1 mg, 0.25 mol%) and aminating agent (21 mg, 0.1 mmol, 0.2 equiv) were added and the stirring was continued for another 2 h. Chromatographic purification on a CombiFlash system over SiO<sub>2</sub> gave the title aziridine as an oil (91 mg, 81%) accompanied by the 2,3-regioisomer (3 mg, 3%). **Major regioisomer.** TLC: R<sub>f</sub> ≈ 0.2 (10% MeOH/CH<sub>2</sub>Cl<sub>2</sub>); <sup>1</sup>H NMR (500 MHz, CDCl<sub>3</sub>) δ 5.37–5.27 (m, 1H), 4.53 (d, *J* = 7.1 Hz, 2H), 2.30 (s, 3H), 2.15–2.05 (m, 2H), 1.98 (s, 3H), 1.65 (s, 3H), 1.56–1.35 (m, 2H), 1.11 (s, 3H), 1.01 (s, 3H), 0.99 (t, *J* = 6.5 Hz, 1H); <sup>13</sup>C NMR (126 MHz, CDCl<sub>3</sub>) δ 171.01, 141.93, 118.50, 61.26, 51.77, 39.60, 39.13, 37.70, 27.44, 21.75, 20.98, 17.87, 16.30; HRMS (ESI<sup>+</sup>) Calcd. for [C<sub>13</sub>H<sub>23</sub>NO<sub>2</sub>+H]<sup>+</sup> 226.1802, Found 226.1801. **Minor regioisomer.** <sup>1</sup>H NMR (400 MHz, CDCl<sub>3</sub>) δ 5.16–5.01 (m, 1H), 4.04 (d, *J* = 6.4 Hz, 2H), 2.43 (s, 3H), 2.20–2.01 (m, 2H), 2.06 (s, 3H), 1.68 (s, 3H), 1.60 (s, 3H), 1.55–1.39 (m, 3H), 1.12 (s, 3H); <sup>13</sup>C NMR (126 MHz, CDCl<sub>3</sub>) δ 171.07,



131.98, 123.59, 64.74, 48.41, 39.09, 32.03, 29.68, 25.67, 25.10, 20.95, 19.19, 17.64; HRMS (ESI<sup>+</sup>) Calcd. for [C<sub>13</sub>H<sub>23</sub>NO<sub>2</sub>+H]<sup>+</sup> 226.1802, Found 226.1797.

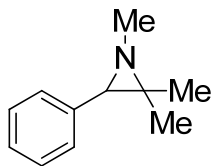

**13d**

**1,2,2-Trimethyl-3-phenylaziridine:** Following the general aziridine procedure, 2-methyl-1-phenyl-2-propene **11f** (66 mg, 0.5 mmol), *N*-methylaminating agent **1b** (0.128 g, 0.6 mmol), and Rh<sub>2</sub>(esp)<sub>2</sub> (3.8 mg, 5 μmol) were stirred in CF<sub>3</sub>CH<sub>2</sub>OH (5 mL) at rt. After 2 h, another portion of catalyst (1 mg, 0.25 mol%) and aminating agent (21 mg, 0.1 mmol, 0.2 equiv) were added to the reaction mixture. Following 2 h more, the crude reaction mixture was purified on a CombiFlash system over SiO<sub>2</sub> to give the title aziridine as an oil (65 mg, 81%). TLC: R<sub>f</sub> ≈ 0.4 (20% EtOAc/hexanes); <sup>1</sup>H NMR (500 MHz, CDCl<sub>3</sub>) δ 7.35–7.28 (m, 4H), 7.27–7.17 (m, 1H), 2.58 (s, 3H), 2.36 (s, 1H), 1.37 (s, 3H), 0.91 (s, 3H); <sup>13</sup>C NMR (126 MHz, CDCl<sub>3</sub>) δ 138.81, 127.89, 127.43, 126.38, 54.39, 42.70, 39.59, 21.47, 17.68; HRMS (ESI<sup>+</sup>) Calcd. for [C<sub>11</sub>H<sub>15</sub>N+H]<sup>+</sup> 162.1277, Found 162.1271.

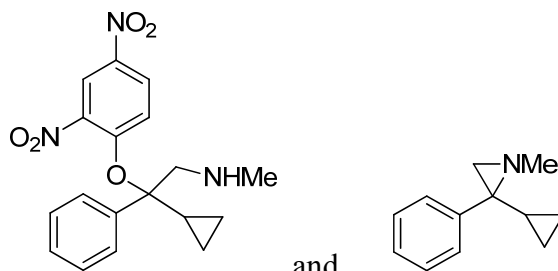

**13e and 13f**

**2-Cyclopropyl-2-(2,4-dinitrophenoxy)-*N*-methyl-2-phenylethanamine:** (1-Cyclopropylvinyl)-benzene **11b** (72 mg, 0.5 mmol), Rh<sub>2</sub>(esp)<sub>2</sub> (3.8 mg, 5 μmol), and *N*-Methyl aminating agent **1b** (0.128 g, 0.6 mmol) were reacted in CF<sub>3</sub>CH<sub>2</sub>OH (5 mL) following the procedure described above for 2-cyclopropyl-2-(2,4-dinitrophenoxy)-2-phenylethanamine **13e**. Chromatographic purification on a CombiFlash system over SiO<sub>2</sub> furnished the title *N*-methylamine SI-11e as a viscous oil (42 mg, 24%) accompanied by the precursor *N*-methylaziridine SI-11f (13 mg, 15%).

**2-Cyclopropyl-2-(2,4-dinitrophenoxy)-*N*-methyl-2-phenylethanamine:** TLC: R<sub>f</sub> ≈ 0.7 (50% EtOAc/hexanes); <sup>1</sup>H NMR (500 MHz, CDCl<sub>3</sub>) δ 8.61 (d, *J* = 2.7 Hz, 1H), 8.06 (dd, *J* = 9.5, 2.7

Hz, 1H), 7.54–7.45 (m, 2H), 7.39–7.30 (m, 2H), 7.32–7.24 (m, 1H), 7.13 (d,  $J = 9.6$  Hz, 1H), 3.98 (d,  $J = 14.7$  Hz, 1H), 3.90 (d,  $J = 14.8$  Hz, 1H), 2.82 (s, 3H), 2.13 (s, 1H), 1.43–1.37 (m, 1H), 0.65–0.54 (m, 1H), 0.53–0.40 (m, 2H), 0.33–0.29 (m, 1H);  $^{13}\text{C}$  NMR (126 MHz,  $\text{CDCl}_3$ )  $\delta$  149.97, 144.07, 136.97, 136.92, 128.46, 127.68, 126.95, 125.37, 123.75, 119.08, 75.86, 64.34, 44.87, 19.38, 1.55, 1.15; HRMS ( $\text{ESI}^+$ ) Calcd. for  $[\text{C}_{18}\text{H}_{19}\text{N}_3\text{O}_5+\text{Na}]^+$  380.1217, Found 380.1211. **2-Cyclopropyl-1-methyl-2-phenylaziridine**: TLC:  $R_f \approx 0.5$  (50% EtOAc/hexanes);  $^1\text{H}$  NMR (500 MHz,  $\text{CDCl}_3$ , 1:4 mixture of invertomers) Major invertomer:  $\delta$  7.45–7.25 (m, 5 H), 2.01 (s, 3H), 1.94 (s, 1H), 1.60 (s, 1H), 1.31–1.20 (m, 1H), 0.56–0.50 (m, 1H), 0.46–0.41 (m, 1H), 0.33–0.25 (m, 2H);  $^{13}\text{C}$  NMR (101 MHz,  $\text{CDCl}_3$ )  $\delta$  138.86, 130.15, 128.02, 127.37, 47.36, 42.37, 38.10, 18.22, 3.45, 1.17. Minor invertomer:  $\delta$  7.45–7.25 (m, 1.0 H, overlapped with major invertomer), 2.72 (s, 0.74H), 1.86 (br s, 0.30H), 1.55 (s, 0.24H), 1.20–1.15 (m, 0.22H), 0.72–0.66 (m, 0.21H), 0.65–0.60 (m, 0.21H), 0.39–0.35 (m, 0.45H);  $^{13}\text{C}$  NMR (101 MHz,  $\text{CDCl}_3$ ):  $\delta$  143.49, 127.85, 127.71, 126.42, 46.42, 40.59, 39.73, 10.98, 5.23, 2.92; HRMS ( $\text{ESI}^+$ ): Calcd. for  $[\text{C}_{12}\text{H}_{15}\text{N}+\text{H}]^+$  174.1277, Found 174.1281.

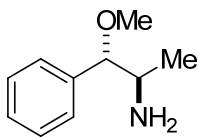

14

**erythro-1-Methoxy-1-phenylpropan-2-amine**: (62) CSA (46 mg, 0.2 mmol) was added to a stirring 0 °C solution of (*E*)-2-methyl-3-phenylaziridine **12c** (27 mg, 0.2 mmol) in dry MeOH (2 mL). After 1 h, the reaction mixture was warmed to rt. After 16 h, the reaction mixture was warmed to 40 °C and held at this temperature for an additional 1 h. The reaction mixture was then cooled to rt, diluted with  $\text{CHCl}_3$  (5 mL), and the pH was adjusted to 8.5 using aqueous 1.0 M NaOH. The layers were separated, and the aqueous layer was extracted with  $\text{CHCl}_3$  (5 mL  $\times$  3). The combined organic layers were washed with brine (5 mL), dried over  $\text{Na}_2\text{SO}_4$ , and concentrated to obtain the title amino-alcohol as a light yellow oil in quantitative yield (33 mg). TLC:  $R_f \approx 0.2$  (10% MeOH/DCM);  $^1\text{H}$  NMR (400 MHz,  $\text{CDCl}_3$ ):  $\delta$  7.45–7.08 (m, 5H), 3.93 (d,  $J = 5.5$  Hz, 1H), 3.24 (s, 3H), 3.14 (app qn,  $J = 6.0$  Hz, 1H), 1.32 (br s, 2H), 1.05 (d,  $J = 6.5$  Hz, 3H);  $^{13}\text{C}$  NMR (101 MHz,  $\text{CDCl}_3$ ):  $\delta$  138.89, 128.22, 127.73, 127.60, 88.92, 57.01, 51.67, 19.19; HRMS ( $\text{ESI}^+$ ): Calcd. for  $[\text{C}_{10}\text{H}_{15}\text{NO}+\text{H}]^+$  166.1226, Found 166.1220.

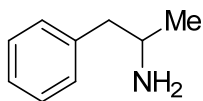

15

**1-Phenylpropan-2-amine:(63)** A suspension of (*E*)-2-methyl-3-phenylaziridine **12c** (20 mg, 0.15 mmol) and 10% Pd/C (10 mg) in MeOH (1 mL) was stirred under a hydrogen atmosphere (1 atm) at rt for 16 h. The reaction mixture was filtered by passage through a small pad of Celite™. The pad was washed with methanol and the combined filtrates were evaporated to furnish the title amine as an oil (19 mg, 96%). <sup>1</sup>H NMR (500 MHz, CDCl<sub>3</sub>) δ 8.46 (br s, 2H), 7.34–7.20 (m, 5H), 3.65–3.53 (m, 1H), 3.27 (dd, *J* = 13.4, 5.1 Hz, 1H), 2.87 (dd, *J* = 13.3, 9.1 Hz, 1H), 1.39 (d, *J* = 6.4 Hz, 3H); <sup>13</sup>C NMR (126 MHz, CDCl<sub>3</sub>) δ 135.83, 129.35, 128.87, 127.26, 49.80, 41.07, 18.13.

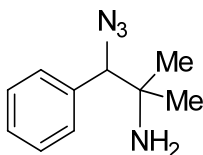

16

**1-Azido-2-methyl-1-phenylpropan-2-amine:** CSA (77 mg, 0.33 mmol, 1.1 equiv) was added to a stirring 0 °C solution of 2,2-dimethyl-3-phenylaziridine **12f** (44 mg, 0.3 mmol) in dry CH<sub>3</sub>CN (3 mL). After 10 min, NaN<sub>3</sub> (59 mg, 0.9 mmol, 3.0 equiv) was added and the temperature was then raised to 50 °C. After 46 h, the reaction mixture was cooled to rt, diluted with CHCl<sub>3</sub> (5 mL), and the pH was adjusted to 8.5 using aqueous 1.0 M NaOH. The layers were separated and the aqueous layer was extracted with CHCl<sub>3</sub> (5 mL × 3). The combined organic layers were washed with brine (5 mL), dried over Na<sub>2</sub>SO<sub>4</sub>, and concentrated. The residue was purified on a CombiFlash system over SiO<sub>2</sub> using 70-80% EtOAc/hexanes as eluent to give the title azido-amine as an oil (45 mg, 79%). TLC: R<sub>f</sub> ≈ 0.3 (80% EtOAc/hexanes); <sup>1</sup>H NMR (500 MHz, CDCl<sub>3</sub>) δ 7.40–7.27 (m, 5H), 4.41 (s, 1H), 1.33 (br s, 2H), 1.13 (s, 3H), 1.01 (s, 3H); <sup>13</sup>C NMR (126 MHz, CDCl<sub>3</sub>) δ 136.76, 128.40, 128.26, 128.25, 76.60, 53.01, 27.67, 26.71; HRMS (ESI<sup>+</sup>) Calcd. for [C<sub>10</sub>H<sub>14</sub>N<sub>4</sub>+H]<sup>+</sup> 191.1291, Found 191.1287; IR (neat) 3366, 3320, 2971, 2102 cm<sup>-1</sup>.

### Starting alkenes synthesis:

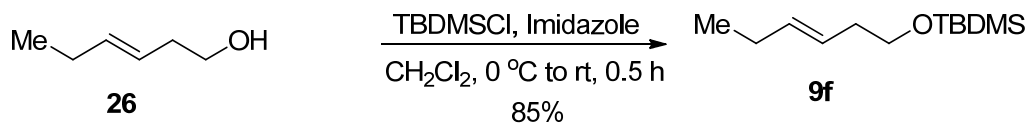

**(E)-tert-butyl(hex-3-en-1-yloxy)dimethylsilane:** To a stirred solution of (*E*)-hex-3-en-1-ol **26** (0.3 g, 3.0 mmol) in dry CH<sub>2</sub>Cl<sub>2</sub> (6 mL) at rt was added imidazole (0.245 g, 3.6 mmol) in one portion, and the reaction mixture was cooled to 0 °C. Then *tert*-butyldimethylchlorosilane (TBDMSCI) (0.542 g, 3.6 mmol) was added in one portion; stirring was continued at that temperature for 10 minutes before warming up to rt. TLC analysis after a total of 30 min indicated the reaction was complete. The reaction mixture was then diluted with CH<sub>2</sub>Cl<sub>2</sub> (10 mL) and washed once with water (10 mL). The aqueous layer was extracted once with CH<sub>2</sub>Cl<sub>2</sub> (10 mL) and the combined organic extracts were washed with brine (5 mL), dried over Na<sub>2</sub>SO<sub>4</sub>, and concentrated *in vacuo* to obtain the crude product which was purified by Combiflash column chromatography using a gradient EtOAc/hexanes (2-3%) as eluent to furnish title protected alcohol as a colorless oil (0.55 g, 85%). TLC: R<sub>f</sub> ≈ 0.8 (5% EtOAc/hexanes); <sup>1</sup>H NMR (400 MHz, CDCl<sub>3</sub>) δ 5.58–5.45 (m, 1H), 5.45–5.32 (m, 1H), 3.61 (t, *J* = 7.0 Hz, 2H), 2.26–2.15 (m, 2H), 2.06–1.94 (m, 2H), 0.96 (t, *J* = 7.4 Hz, 3H), 0.89 (s, 9H), 0.05 (s, 6H); <sup>13</sup>C NMR (101 MHz, CDCl<sub>3</sub>) δ 134.14, 125.32, 63.38, 36.26, 25.95, 25.66, 18.38, 13.78, -5.24.

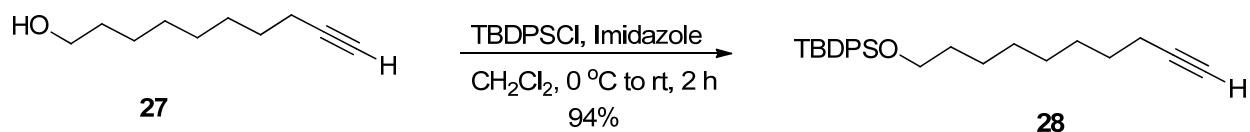

**tert-butyl(dec-9-yn-1-yloxy)diphenylsilane:** To a stirring solution of dec-9-yn-1-ol(*64*) **27** (1.5 g, 9.7 mmol) in dry CH<sub>2</sub>Cl<sub>2</sub> (20 mL) at rt was added imidazole (0.794 g, 11.6 mmol) in one portion. The reaction mixture was cooled to 0 °C. Then *tert*-butyldiphenylchlorosilane (TBDPSCI) (2.91 g, 10.6 mmol) was added dropwise and the reaction mixture was stirred for 10 minutes before warming up to rt. After stirring for a total of 2 h (TLC analysis), the reaction mixture was diluted with CH<sub>2</sub>Cl<sub>2</sub> (10 mL), water (10 mL) was added, and the layers were separated. The aqueous layer was extracted with CH<sub>2</sub>Cl<sub>2</sub> (2 × 20 mL) and the combined organic extracts were washed with brine (20 mL), dried over Na<sub>2</sub>SO<sub>4</sub>, and concentrated *in vacuo*. The crude product was purified by Combiflash column chromatography using a gradient EtOAc/hexanes (1-3%) as eluent to furnish the title alkyne as a colorless viscous oil (3.60 g,

94%). TLC:  $R_f \approx 0.8$  (5% EtOAc/hexanes);  $^1\text{H}$  NMR (400 MHz,  $\text{CDCl}_3$ )  $\delta$  7.70–7.65 (m, 4H), 7.50–7.31 (m, 6H), 3.66 (t,  $J = 6.5$  Hz, 2H), 2.18 (td,  $J = 7.1, 2.7$  Hz, 2H), 1.94 (t,  $J = 2.6$  Hz, 1H), 1.64–1.46 (m, 4H), 1.46–1.22 (m, 8H), 1.06 (s, 9H);  $^{13}\text{C}$  NMR (101 MHz,  $\text{CDCl}_3$ )  $\delta$  135.57, 134.15, 129.47, 127.55, 84.78, 68.06, 63.96, 32.54, 29.21, 29.06, 28.69, 28.47, 26.87, 25.71, 19.22, 18.40; HRMS ( $\text{ESI}^+$ ) Calcd. for  $[\text{C}_{26}\text{H}_{36}\text{OSi}+\text{H}]^+$  393.2608, Found 393.2609.

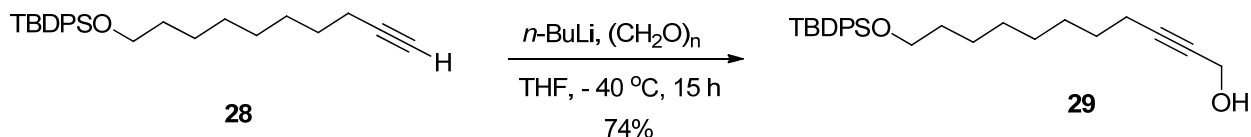

**11-((*tert*-butyldiphenylsilyloxy)undec-2-yn-1-ol):** To a stirring solution of *tert*-butyl(dec-9-yn-1-yloxy)diphenylsilane **28** (0.325 g, 0.83 mmol) in dry THF (3 mL) at  $-40\text{ }^\circ\text{C}$  was added *n*-BuLi (2.5 M in hexanes, 0.4 mL, 0.996 mmol), and the resulting light yellow solution was stirred at that temperature for 10 min. A suspension of paraformaldehyde (0.075 g, 2.49 mmol) in dry THF (1 mL) at  $-40\text{ }^\circ\text{C}$  was then added *via* cannula, and the stirring was continued at that temperature for 15 minutes before warming up to rt. After a total of 15 h (TLC analysis), saturated aqueous  $\text{NH}_4\text{Cl}$  solution (2 mL) and EtOAc (10 mL) were added to the reaction mixture. The layers were separated and the aqueous layer was extracted with EtOAc ( $2 \times 10$  mL). The combined organic extracts were washed with brine (10 mL), dried over  $\text{Na}_2\text{SO}_4$ , and concentrated *in vacuo*. The crude product was purified by Combiflash column chromatography using a gradient of EtOAc/hexanes (10–15%) as eluent to furnish the title alcohol as a thick, colorless oil (0.26 g, 74%). TLC:  $R_f \approx 0.3$  (20% EtOAc/hexanes);  $^1\text{H}$  NMR (400 MHz,  $\text{CDCl}_3$ )  $\delta$  7.70–7.64 (m, 4H), 7.46–7.34 (m, 6H), 4.25 (dt,  $J = 6.0, 2.2$  Hz, 2H), 3.65 (t,  $J = 6.5$  Hz, 2H), 2.21 (tt,  $J = 7.1, 2.2$  Hz, 2H), 1.64–1.43 (m, 4H), 1.42–1.21 (m, 8H), 1.05 (s, 9H);  $^{13}\text{C}$  NMR (101 MHz,  $\text{CDCl}_3$ )  $\delta$  135.56, 134.14, 129.47, 127.55, 86.65, 78.26, 63.97, 51.44, 32.53, 29.21, 29.07, 28.79, 28.57, 26.87, 25.71, 19.22, 18.73; HRMS ( $\text{ESI}^+$ ) Calcd. for  $[\text{C}_{27}\text{H}_{38}\text{O}_2\text{Si}+\text{Na}]^+$  445.2533, Found 445.2524.

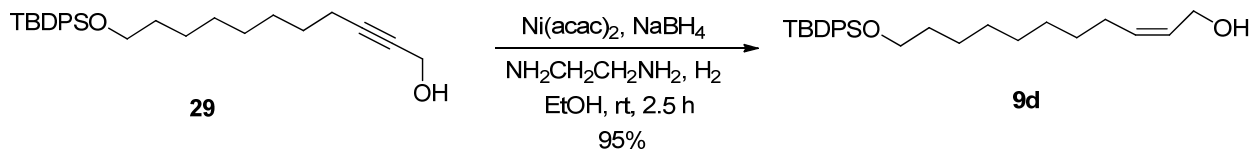

**(*Z*)-11-((*tert*-Butyldiphenylsilyloxy)undec-2-en-1-ol):** To a stirring solution of  $\text{Ni}(\text{acac})_2 \cdot 4\text{H}_2\text{O}$  (0.348 g, 1.4 mmol) in absolute ethanol (12 mL) at rt was added  $\text{NaBH}_4$  (53 mg, 1.4 mmol). The

resulting black reaction mixture was stirred under H<sub>2</sub> (1 atm) for 20 minutes before adding ethylenediamine (0.19 mL, 2.9 mmol). After 15 min, a solution of 11-((*tert*-butyldiphenylsilyloxy)undec-2-yn-1-ol **29** (2.49 g, 5.9 mmol) in absolute ethanol (10 mL) was added and the stirring was continued for a total of 2.5 h (TLC analysis). The reaction mixture was then passed through a small pad of silica to remove the solids. The filtrate was concentrated and the crude product was purified by Combi-flash column chromatography using a gradient of EtOAc/hexanes (20-25%) as eluent to furnish the title alcohol as a viscous, colorless oil (2.38 g, 95%). TLC: R<sub>f</sub> ≈ 0.6 (40% EtOAc/hexanes); <sup>1</sup>H NMR (400 MHz, CDCl<sub>3</sub>) δ 7.70–7.64 (m, 4H), 7.48–7.29 (m, 6H), 5.67–5.45 (m, 2H), 4.20 (d, *J* = 6.2 Hz, 2H), 3.66 (t, *J* = 6.5 Hz, 2H), 2.07 (app q, *J* = 7.1 Hz, 2H), 1.68–1.45 (m, 3H), 1.46–1.16 (m, 10H), 1.05 (s, 9H); <sup>13</sup>C NMR (101 MHz, CDCl<sub>3</sub>) δ 135.56, 134.15, 133.27, 129.47, 128.27, 127.55, 63.97, 58.62, 32.55, 29.59, 29.42, 29.30, 29.14, 27.43, 26.87, 25.74, 19.22; HRMS (ESI<sup>+</sup>) Calcd. for [C<sub>27</sub>H<sub>40</sub>O<sub>2</sub>Si+H]<sup>+</sup> 425.2876, Found 425.2881.

#### X-ray Diffraction Experiment Data for Compound 10ss

The data were measured at 100(2) K on a Bruker D8 Quest system equipped with a Photon 100 CMOS detector and Oxford Cryosystems 700 series cooler, a Triumph monochromator, and a Mo K $\alpha$  fine-focus sealed tube ( $\lambda = 0.71073 \text{ \AA}$ ). Intensity data were processed using the Saint Plus program. All the calculations for the structure determination were carried out using the SHELXTL package (version 6.14).<sup>(65)</sup> Initial atomic positions were located by using XT, and the structures of the compounds were refined by the least-squares method using XL. Absorption corrections were applied by using SADABS. Hydrogen atoms were placed at calculated positions and refined riding on the corresponding carbons.

**Table S4.** Crystal data and structure refinement for C<sub>36</sub>H<sub>55</sub>NO<sub>4</sub>S.

|                   |                                                    |
|-------------------|----------------------------------------------------|
| Empirical formula | C <sub>36</sub> H <sub>55</sub> N O <sub>4</sub> S |
| Formula weight    | 597.87                                             |
| Temperature       | 100(2) K                                           |
| Wavelength        | 0.71073 $\text{\AA}$                               |

|                                   |                                                                                                          |
|-----------------------------------|----------------------------------------------------------------------------------------------------------|
| Crystal system                    | Monoclinic                                                                                               |
| Space group                       | P 2 <sub>1</sub>                                                                                         |
| Unit cell dimensions              | a = 14.0032(7) Å      α = 90°.<br>b = 6.0260(3) Å      β = 106.216(1)°.<br>c = 21.2960(11) Å    γ = 90°. |
| Volume                            | 1725.53(15) Å <sup>3</sup>                                                                               |
| Z                                 | 2                                                                                                        |
| Density (calculated)              | 1.151 Mg/m <sup>3</sup>                                                                                  |
| Absorption coefficient            | 0.131 mm <sup>-1</sup>                                                                                   |
| F(000)                            | 652                                                                                                      |
| Crystal size                      | 0.543 x 0.333 x 0.066 mm <sup>3</sup>                                                                    |
| Theta range for data collection   | 2.913 to 33.141°.                                                                                        |
| Index ranges                      | -21 ≤ h ≤ 21, -9 ≤ k ≤ 9, -32 ≤ l ≤ 32                                                                   |
| Reflections collected             | 30153                                                                                                    |
| Independent reflections           | 13103 [R(int) = 0.0451]                                                                                  |
| Completeness to theta = 25.000°   | 99.7 %                                                                                                   |
| Absorption correction             | Numerical                                                                                                |
| Max. and min. transmission        | 1.000 and 0.885                                                                                          |
| Refinement method                 | Full-matrix least-squares on F <sup>2</sup>                                                              |
| Data / restraints / parameters    | 13103 / 1 / 386                                                                                          |
| Goodness-of-fit on F <sup>2</sup> | 1.067                                                                                                    |
| Final R indices [I > 2σ(I)]       | R1 = 0.0566, wR2 = 0.1265                                                                                |
| R indices (all data)              | R1 = 0.0800, wR2 = 0.1352                                                                                |
| Absolute structure parameter      | -0.01(2)                                                                                                 |
| Extinction coefficient            | n/a                                                                                                      |
| Largest diff. peak and hole       | 0.774 and -0.343 e.Å <sup>-3</sup>                                                                       |

**Table S5.** Atomic coordinates ( $\times 10^4$ ) and equivalent isotropic displacement parameters ( $\text{\AA}^2 \times 10^3$ ) for  $\text{C}_{36}\text{H}_{55}\text{NO}_4\text{S}$ .  $U(\text{eq})$  is defined as one third of the trace of the orthogonalized  $U^{ij}$  tensor.

|       | x       | y        | z       | U(eq) |
|-------|---------|----------|---------|-------|
| S(1)  | 6370(1) | -106(1)  | 9144(1) | 18(1) |
| O(1)  | 6767(1) | -2317(3) | 9189(1) | 24(1) |
| O(2)  | 6864(1) | 1499(3)  | 9625(1) | 25(1) |
| O(3)  | 9721(1) | 3170(3)  | 8816(1) | 24(1) |
| O(4)  | 9423(2) | 6750(4)  | 8974(1) | 50(1) |
| N(1)  | 6219(1) | 700(3)   | 8381(1) | 15(1) |
| C(1)  | 5115(2) | -168(4)  | 9137(1) | 17(1) |
| C(2)  | 4702(2) | 1676(4)  | 9361(1) | 21(1) |
| C(3)  | 3702(2) | 1650(5)  | 9336(1) | 24(1) |
| C(4)  | 3112(2) | -205(5)  | 9105(1) | 25(1) |
| C(5)  | 3542(2) | -2033(5) | 8886(1) | 26(1) |
| C(6)  | 4538(2) | -2034(4) | 8898(1) | 22(1) |
| C(7)  | 2039(2) | -228(7)  | 9105(1) | 36(1) |
| C(8)  | 8779(2) | 3035(4)  | 8311(1) | 18(1) |
| C(9)  | 8026(2) | 2033(4)  | 8615(1) | 17(1) |
| C(10) | 7007(2) | 1714(4)  | 8120(1) | 13(1) |
| C(11) | 6997(2) | 722(4)   | 7448(1) | 12(1) |
| C(12) | 7892(2) | 1638(4)  | 7232(1) | 17(1) |
| C(13) | 8896(2) | 1584(4)  | 7759(1) | 19(1) |
| C(14) | 6156(2) | 3085(4)  | 8204(1) | 14(1) |
| C(15) | 5258(2) | 3572(4)  | 7643(1) | 14(1) |
| C(16) | 5083(2) | 1776(4)  | 7115(1) | 12(1) |
| C(17) | 6035(2) | 1408(4)  | 6898(1) | 13(1) |
| C(18) | 4245(2) | 2495(4)  | 6524(1) | 12(1) |
| C(19) | 3982(2) | 815(4)   | 5955(1) | 14(1) |
| C(20) | 4929(2) | 538(4)   | 5732(1) | 18(1) |



|       |          |          |         |       |
|-------|----------|----------|---------|-------|
| C(21) | 5824(2)  | -169(4)  | 6302(1) | 17(1) |
| C(22) | 3240(2)  | 3099(4)  | 6633(1) | 16(1) |
| C(23) | 2512(2)  | 3025(4)  | 5936(1) | 17(1) |
| C(24) | 3097(2)  | 2038(4)  | 5474(1) | 16(1) |
| C(25) | 2402(2)  | 751(5)   | 4900(1) | 22(1) |
| C(26) | 1642(2)  | 2371(5)  | 4474(1) | 28(1) |
| C(27) | 747(2)   | 1308(6)  | 3992(2) | 42(1) |
| C(28) | 62(2)    | 3029(5)  | 3557(1) | 32(1) |
| C(29) | -942(2)  | 2171(7)  | 3149(2) | 46(1) |
| C(30) | -1532(3) | 4087(7)  | 2769(2) | 47(1) |
| C(31) | -874(3)  | 307(9)   | 2713(2) | 81(2) |
| C(32) | 2958(2)  | -469(5)  | 4479(1) | 31(1) |
| C(33) | 3636(2)  | -1418(4) | 6163(1) | 18(1) |
| C(34) | 7116(2)  | -1798(4) | 7544(1) | 18(1) |
| C(35) | 9927(2)  | 5121(5)  | 9134(1) | 24(1) |
| C(36) | 10826(2) | 4964(6)  | 9710(1) | 34(1) |

**Table S6.** Bond lengths [ $\text{\AA}$ ] and angles [ $^\circ$ ] for  $\text{C}_{36}\text{H}_{55}\text{NO}_4\text{S}$ .

---

|            |            |
|------------|------------|
| S(1)-O(1)  | 1.4365(19) |
| S(1)-O(2)  | 1.4379(18) |
| S(1)-N(1)  | 1.6513(18) |
| S(1)-C(1)  | 1.754(2)   |
| O(3)-C(35) | 1.348(3)   |
| O(3)-C(8)  | 1.452(3)   |
| O(4)-C(35) | 1.202(3)   |
| N(1)-C(14) | 1.482(3)   |
| N(1)-C(10) | 1.497(3)   |
| C(1)-C(6)  | 1.395(3)   |
| C(1)-C(2)  | 1.396(3)   |
| C(2)-C(3)  | 1.386(4)   |
| C(2)-H(2)  | 0.9500     |
| C(3)-C(4)  | 1.396(4)   |
| C(3)-H(3)  | 0.9500     |
| C(4)-C(5)  | 1.397(4)   |

|              |          |
|--------------|----------|
| C(4)-C(7)    | 1.503(4) |
| C(5)-C(6)    | 1.389(4) |
| C(5)-H(5)    | 0.9500   |
| C(6)-H(6)    | 0.9500   |
| C(7)-H(7A)   | 0.9800   |
| C(7)-H(7B)   | 0.9800   |
| C(7)-H(7C)   | 0.9800   |
| C(8)-C(13)   | 1.510(3) |
| C(8)-C(9)    | 1.510(3) |
| C(8)-H(8)    | 1.0000   |
| C(9)-C(10)   | 1.530(3) |
| C(9)-H(9A)   | 0.9900   |
| C(9)-H(9B)   | 0.9900   |
| C(10)-C(14)  | 1.501(3) |
| C(10)-C(11)  | 1.549(3) |
| C(11)-C(34)  | 1.535(3) |
| C(11)-C(12)  | 1.552(3) |
| C(11)-C(17)  | 1.574(3) |
| C(12)-C(13)  | 1.535(3) |
| C(12)-H(12A) | 0.9900   |
| C(12)-H(12B) | 0.9900   |
| C(13)-H(13A) | 0.9900   |
| C(13)-H(13B) | 0.9900   |
| C(14)-C(15)  | 1.501(3) |
| C(14)-H(14)  | 1.0000   |
| C(15)-C(16)  | 1.531(3) |
| C(15)-H(15A) | 0.9900   |
| C(15)-H(15B) | 0.9900   |
| C(16)-C(18)  | 1.525(3) |
| C(16)-C(17)  | 1.544(3) |
| C(16)-H(16)  | 1.0000   |
| C(17)-C(21)  | 1.545(3) |
| C(17)-H(17)  | 1.0000   |
| C(18)-C(22)  | 1.533(3) |
| C(18)-C(19)  | 1.541(3) |
| C(18)-H(18)  | 1.0000   |

|              |          |
|--------------|----------|
| C(19)-C(33)  | 1.537(3) |
| C(19)-C(20)  | 1.537(3) |
| C(19)-C(24)  | 1.556(3) |
| C(20)-C(21)  | 1.542(3) |
| C(20)-H(20A) | 0.9900   |
| C(20)-H(20B) | 0.9900   |
| C(21)-H(21A) | 0.9900   |
| C(21)-H(21B) | 0.9900   |
| C(22)-C(23)  | 1.548(3) |
| C(22)-H(22A) | 0.9900   |
| C(22)-H(22B) | 0.9900   |
| C(23)-C(24)  | 1.564(3) |
| C(23)-H(23A) | 0.9900   |
| C(23)-H(23B) | 0.9900   |
| C(24)-C(25)  | 1.542(3) |
| C(24)-H(24)  | 1.0000   |
| C(25)-C(32)  | 1.529(4) |
| C(25)-C(26)  | 1.539(3) |
| C(25)-H(25)  | 1.0000   |
| C(26)-C(27)  | 1.522(4) |
| C(26)-H(26A) | 0.9900   |
| C(26)-H(26B) | 0.9900   |
| C(27)-C(28)  | 1.536(4) |
| C(27)-H(27A) | 0.9900   |
| C(27)-H(27B) | 0.9900   |
| C(28)-C(29)  | 1.521(4) |
| C(28)-H(28A) | 0.9900   |
| C(28)-H(28B) | 0.9900   |
| C(29)-C(31)  | 1.478(6) |
| C(29)-C(30)  | 1.516(5) |
| C(29)-H(29)  | 1.0000   |
| C(30)-H(30A) | 0.9800   |
| C(30)-H(30B) | 0.9800   |
| C(30)-H(30C) | 0.9800   |
| C(31)-H(31A) | 0.9800   |
| C(31)-H(31B) | 0.9800   |

|                  |            |
|------------------|------------|
| C(31)-H(31C)     | 0.9800     |
| C(32)-H(32A)     | 0.9800     |
| C(32)-H(32B)     | 0.9800     |
| C(32)-H(32C)     | 0.9800     |
| C(33)-H(33A)     | 0.9800     |
| C(33)-H(33B)     | 0.9800     |
| C(33)-H(33C)     | 0.9800     |
| C(34)-H(34A)     | 0.9800     |
| C(34)-H(34B)     | 0.9800     |
| C(34)-H(34C)     | 0.9800     |
| C(35)-C(36)      | 1.495(3)   |
| C(36)-H(36A)     | 0.9800     |
| C(36)-H(36B)     | 0.9800     |
| C(36)-H(36C)     | 0.9800     |
| O(1)-S(1)-O(2)   | 118.44(11) |
| O(1)-S(1)-N(1)   | 106.20(10) |
| O(2)-S(1)-N(1)   | 114.03(11) |
| O(1)-S(1)-C(1)   | 110.43(12) |
| O(2)-S(1)-C(1)   | 107.52(11) |
| N(1)-S(1)-C(1)   | 98.39(10)  |
| C(35)-O(3)-C(8)  | 116.39(19) |
| C(14)-N(1)-C(10) | 60.49(14)  |
| C(14)-N(1)-S(1)  | 121.18(15) |
| C(10)-N(1)-S(1)  | 125.43(14) |
| C(6)-C(1)-C(2)   | 120.9(2)   |
| C(6)-C(1)-S(1)   | 119.77(19) |
| C(2)-C(1)-S(1)   | 119.35(19) |
| C(3)-C(2)-C(1)   | 119.2(2)   |
| C(3)-C(2)-H(2)   | 120.4      |
| C(1)-C(2)-H(2)   | 120.4      |
| C(2)-C(3)-C(4)   | 121.0(2)   |
| C(2)-C(3)-H(3)   | 119.5      |
| C(4)-C(3)-H(3)   | 119.5      |
| C(3)-C(4)-C(5)   | 118.8(2)   |
| C(3)-C(4)-C(7)   | 120.1(3)   |

|                   |            |
|-------------------|------------|
| C(5)-C(4)-C(7)    | 121.1(3)   |
| C(6)-C(5)-C(4)    | 121.3(3)   |
| C(6)-C(5)-H(5)    | 119.4      |
| C(4)-C(5)-H(5)    | 119.4      |
| C(5)-C(6)-C(1)    | 118.8(2)   |
| C(5)-C(6)-H(6)    | 120.6      |
| C(1)-C(6)-H(6)    | 120.6      |
| C(4)-C(7)-H(7A)   | 109.5      |
| C(4)-C(7)-H(7B)   | 109.5      |
| H(7A)-C(7)-H(7B)  | 109.5      |
| C(4)-C(7)-H(7C)   | 109.5      |
| H(7A)-C(7)-H(7C)  | 109.5      |
| H(7B)-C(7)-H(7C)  | 109.5      |
| O(3)-C(8)-C(13)   | 109.58(18) |
| O(3)-C(8)-C(9)    | 107.69(18) |
| C(13)-C(8)-C(9)   | 110.1(2)   |
| O(3)-C(8)-H(8)    | 109.8      |
| C(13)-C(8)-H(8)   | 109.8      |
| C(9)-C(8)-H(8)    | 109.8      |
| C(8)-C(9)-C(10)   | 112.57(18) |
| C(8)-C(9)-H(9A)   | 109.1      |
| C(10)-C(9)-H(9A)  | 109.1      |
| C(8)-C(9)-H(9B)   | 109.1      |
| C(10)-C(9)-H(9B)  | 109.1      |
| H(9A)-C(9)-H(9B)  | 107.8      |
| N(1)-C(10)-C(14)  | 59.28(14)  |
| N(1)-C(10)-C(9)   | 115.98(17) |
| C(14)-C(10)-C(9)  | 117.90(18) |
| N(1)-C(10)-C(11)  | 111.59(17) |
| C(14)-C(10)-C(11) | 121.28(17) |
| C(9)-C(10)-C(11)  | 116.81(18) |
| C(34)-C(11)-C(10) | 106.63(18) |
| C(34)-C(11)-C(12) | 108.97(19) |
| C(10)-C(11)-C(12) | 109.66(17) |
| C(34)-C(11)-C(17) | 113.42(17) |
| C(10)-C(11)-C(17) | 111.83(17) |

|                     |            |
|---------------------|------------|
| C(12)-C(11)-C(17)   | 106.29(16) |
| C(13)-C(12)-C(11)   | 115.30(18) |
| C(13)-C(12)-H(12A)  | 108.5      |
| C(11)-C(12)-H(12A)  | 108.5      |
| C(13)-C(12)-H(12B)  | 108.5      |
| C(11)-C(12)-H(12B)  | 108.5      |
| H(12A)-C(12)-H(12B) | 107.5      |
| C(8)-C(13)-C(12)    | 106.24(18) |
| C(8)-C(13)-H(13A)   | 110.5      |
| C(12)-C(13)-H(13A)  | 110.5      |
| C(8)-C(13)-H(13B)   | 110.5      |
| C(12)-C(13)-H(13B)  | 110.5      |
| H(13A)-C(13)-H(13B) | 108.7      |
| N(1)-C(14)-C(15)    | 111.68(18) |
| N(1)-C(14)-C(10)    | 60.23(14)  |
| C(15)-C(14)-C(10)   | 122.03(18) |
| N(1)-C(14)-H(14)    | 116.6      |
| C(15)-C(14)-H(14)   | 116.6      |
| C(10)-C(14)-H(14)   | 116.6      |
| C(14)-C(15)-C(16)   | 111.89(18) |
| C(14)-C(15)-H(15A)  | 109.2      |
| C(16)-C(15)-H(15A)  | 109.2      |
| C(14)-C(15)-H(15B)  | 109.2      |
| C(16)-C(15)-H(15B)  | 109.2      |
| H(15A)-C(15)-H(15B) | 107.9      |
| C(18)-C(16)-C(15)   | 109.54(17) |
| C(18)-C(16)-C(17)   | 108.86(16) |
| C(15)-C(16)-C(17)   | 110.30(17) |
| C(18)-C(16)-H(16)   | 109.4      |
| C(15)-C(16)-H(16)   | 109.4      |
| C(17)-C(16)-H(16)   | 109.4      |
| C(16)-C(17)-C(21)   | 110.54(16) |
| C(16)-C(17)-C(11)   | 116.48(16) |
| C(21)-C(17)-C(11)   | 112.11(17) |
| C(16)-C(17)-H(17)   | 105.6      |
| C(21)-C(17)-H(17)   | 105.6      |

|                     |            |
|---------------------|------------|
| C(11)-C(17)-H(17)   | 105.6      |
| C(16)-C(18)-C(22)   | 118.05(17) |
| C(16)-C(18)-C(19)   | 114.94(17) |
| C(22)-C(18)-C(19)   | 104.29(16) |
| C(16)-C(18)-H(18)   | 106.2      |
| C(22)-C(18)-H(18)   | 106.2      |
| C(19)-C(18)-H(18)   | 106.2      |
| C(33)-C(19)-C(20)   | 111.24(19) |
| C(33)-C(19)-C(18)   | 112.00(17) |
| C(20)-C(19)-C(18)   | 106.08(17) |
| C(33)-C(19)-C(24)   | 110.27(18) |
| C(20)-C(19)-C(24)   | 116.43(18) |
| C(18)-C(19)-C(24)   | 100.26(17) |
| C(19)-C(20)-C(21)   | 111.61(17) |
| C(19)-C(20)-H(20A)  | 109.3      |
| C(21)-C(20)-H(20A)  | 109.3      |
| C(19)-C(20)-H(20B)  | 109.3      |
| C(21)-C(20)-H(20B)  | 109.3      |
| H(20A)-C(20)-H(20B) | 108.0      |
| C(20)-C(21)-C(17)   | 113.77(19) |
| C(20)-C(21)-H(21A)  | 108.8      |
| C(17)-C(21)-H(21A)  | 108.8      |
| C(20)-C(21)-H(21B)  | 108.8      |
| C(17)-C(21)-H(21B)  | 108.8      |
| H(21A)-C(21)-H(21B) | 107.7      |
| C(18)-C(22)-C(23)   | 103.60(17) |
| C(18)-C(22)-H(22A)  | 111.0      |
| C(23)-C(22)-H(22A)  | 111.0      |
| C(18)-C(22)-H(22B)  | 111.0      |
| C(23)-C(22)-H(22B)  | 111.0      |
| H(22A)-C(22)-H(22B) | 109.0      |
| C(22)-C(23)-C(24)   | 107.07(17) |
| C(22)-C(23)-H(23A)  | 110.3      |
| C(24)-C(23)-H(23A)  | 110.3      |
| C(22)-C(23)-H(23B)  | 110.3      |
| C(24)-C(23)-H(23B)  | 110.3      |

|                     |            |
|---------------------|------------|
| H(23A)-C(23)-H(23B) | 108.6      |
| C(25)-C(24)-C(19)   | 119.62(19) |
| C(25)-C(24)-C(23)   | 111.40(18) |
| C(19)-C(24)-C(23)   | 103.10(16) |
| C(25)-C(24)-H(24)   | 107.4      |
| C(19)-C(24)-H(24)   | 107.4      |
| C(23)-C(24)-H(24)   | 107.4      |
| C(32)-C(25)-C(26)   | 109.9(2)   |
| C(32)-C(25)-C(24)   | 113.3(2)   |
| C(26)-C(25)-C(24)   | 109.1(2)   |
| C(32)-C(25)-H(25)   | 108.1      |
| C(26)-C(25)-H(25)   | 108.1      |
| C(24)-C(25)-H(25)   | 108.1      |
| C(27)-C(26)-C(25)   | 115.7(2)   |
| C(27)-C(26)-H(26A)  | 108.3      |
| C(25)-C(26)-H(26A)  | 108.3      |
| C(27)-C(26)-H(26B)  | 108.3      |
| C(25)-C(26)-H(26B)  | 108.3      |
| H(26A)-C(26)-H(26B) | 107.4      |
| C(26)-C(27)-C(28)   | 112.4(3)   |
| C(26)-C(27)-H(27A)  | 109.1      |
| C(28)-C(27)-H(27A)  | 109.1      |
| C(26)-C(27)-H(27B)  | 109.1      |
| C(28)-C(27)-H(27B)  | 109.1      |
| H(27A)-C(27)-H(27B) | 107.9      |
| C(29)-C(28)-C(27)   | 115.9(3)   |
| C(29)-C(28)-H(28A)  | 108.3      |
| C(27)-C(28)-H(28A)  | 108.3      |
| C(29)-C(28)-H(28B)  | 108.3      |
| C(27)-C(28)-H(28B)  | 108.3      |
| H(28A)-C(28)-H(28B) | 107.4      |
| C(31)-C(29)-C(30)   | 111.3(3)   |
| C(31)-C(29)-C(28)   | 113.9(3)   |
| C(30)-C(29)-C(28)   | 109.0(3)   |
| C(31)-C(29)-H(29)   | 107.4      |
| C(30)-C(29)-H(29)   | 107.4      |



|                     |          |
|---------------------|----------|
| C(28)-C(29)-H(29)   | 107.4    |
| C(29)-C(30)-H(30A)  | 109.5    |
| C(29)-C(30)-H(30B)  | 109.5    |
| H(30A)-C(30)-H(30B) | 109.5    |
| C(29)-C(30)-H(30C)  | 109.5    |
| H(30A)-C(30)-H(30C) | 109.5    |
| H(30B)-C(30)-H(30C) | 109.5    |
| C(29)-C(31)-H(31A)  | 109.5    |
| C(29)-C(31)-H(31B)  | 109.5    |
| H(31A)-C(31)-H(31B) | 109.5    |
| C(29)-C(31)-H(31C)  | 109.5    |
| H(31A)-C(31)-H(31C) | 109.5    |
| H(31B)-C(31)-H(31C) | 109.5    |
| C(25)-C(32)-H(32A)  | 109.5    |
| C(25)-C(32)-H(32B)  | 109.5    |
| H(32A)-C(32)-H(32B) | 109.5    |
| C(25)-C(32)-H(32C)  | 109.5    |
| H(32A)-C(32)-H(32C) | 109.5    |
| H(32B)-C(32)-H(32C) | 109.5    |
| C(19)-C(33)-H(33A)  | 109.5    |
| C(19)-C(33)-H(33B)  | 109.5    |
| H(33A)-C(33)-H(33B) | 109.5    |
| C(19)-C(33)-H(33C)  | 109.5    |
| H(33A)-C(33)-H(33C) | 109.5    |
| H(33B)-C(33)-H(33C) | 109.5    |
| C(11)-C(34)-H(34A)  | 109.5    |
| C(11)-C(34)-H(34B)  | 109.5    |
| H(34A)-C(34)-H(34B) | 109.5    |
| C(11)-C(34)-H(34C)  | 109.5    |
| H(34A)-C(34)-H(34C) | 109.5    |
| H(34B)-C(34)-H(34C) | 109.5    |
| O(4)-C(35)-O(3)     | 122.9(2) |
| O(4)-C(35)-C(36)    | 125.3(3) |
| O(3)-C(35)-C(36)    | 111.8(2) |
| C(35)-C(36)-H(36A)  | 109.5    |
| C(35)-C(36)-H(36B)  | 109.5    |

|                     |       |
|---------------------|-------|
| H(36A)-C(36)-H(36B) | 109.5 |
| C(35)-C(36)-H(36C)  | 109.5 |
| H(36A)-C(36)-H(36C) | 109.5 |
| H(36B)-C(36)-H(36C) | 109.5 |

---

Symmetry transformations used to generate equivalent atoms:

**Table S7.** Anisotropic displacement parameters ( $\text{\AA}^2 \times 10^3$ ) for  $\text{C}_{36}\text{H}_{55}\text{NO}_4\text{S}$ . The anisotropic displacement factor exponent takes the form:  $-2\pi^2 [ h^2 a^{*2} U^{11} + \dots + 2 h k a^* b^* U^{12} ]$

|       | U11   | U22   | U33   | U23    | U13    | U12   |
|-------|-------|-------|-------|--------|--------|-------|
| S(1)  | 21(1) | 21(1) | 9(1)  | 1(1)   | 1(1)   | 2(1)  |
| O(1)  | 29(1) | 26(1) | 17(1) | 6(1)   | 6(1)   | 8(1)  |
| O(2)  | 26(1) | 32(1) | 13(1) | -4(1)  | 0(1)   | -3(1) |
| O(3)  | 15(1) | 22(1) | 26(1) | -3(1)  | -8(1)  | 0(1)  |
| O(4)  | 55(1) | 29(1) | 46(1) | -14(1) | -22(1) | 8(1)  |
| N(1)  | 17(1) | 17(1) | 9(1)  | 1(1)   | 2(1)   | -2(1) |
| C(1)  | 21(1) | 20(1) | 11(1) | 2(1)   | 5(1)   | 2(1)  |
| C(2)  | 27(1) | 22(1) | 15(1) | -2(1)  | 5(1)   | 2(1)  |
| C(3)  | 28(1) | 29(1) | 16(1) | -1(1)  | 7(1)   | 7(1)  |
| C(4)  | 25(1) | 35(1) | 16(1) | 5(1)   | 7(1)   | 1(1)  |
| C(5)  | 27(1) | 23(1) | 28(1) | 3(1)   | 5(1)   | -5(1) |
| C(6)  | 27(1) | 19(1) | 21(1) | 1(1)   | 6(1)   | 1(1)  |
| C(7)  | 25(1) | 51(2) | 34(1) | 10(2)  | 10(1)  | 3(2)  |
| C(8)  | 12(1) | 18(1) | 18(1) | -1(1)  | -5(1)  | 0(1)  |
| C(9)  | 14(1) | 19(1) | 15(1) | -1(1)  | -3(1)  | 1(1)  |
| C(10) | 13(1) | 14(1) | 12(1) | 0(1)   | 0(1)   | -1(1) |
| C(11) | 12(1) | 12(1) | 11(1) | -1(1)  | 1(1)   | 1(1)  |
| C(12) | 12(1) | 22(1) | 15(1) | 1(1)   | 2(1)   | -1(1) |
| C(13) | 11(1) | 24(1) | 20(1) | -1(1)  | 1(1)   | 0(1)  |
| C(14) | 16(1) | 14(1) | 12(1) | -2(1)  | 1(1)   | 0(1)  |
| C(15) | 12(1) | 15(1) | 14(1) | -2(1)  | 1(1)   | 0(1)  |
| C(16) | 12(1) | 11(1) | 11(1) | -1(1)  | 1(1)   | 0(1)  |
| C(17) | 11(1) | 14(1) | 11(1) | 0(1)   | 1(1)   | -1(1) |
| C(18) | 11(1) | 11(1) | 12(1) | 0(1)   | 1(1)   | -1(1) |

|       |       |       |       |        |        |       |
|-------|-------|-------|-------|--------|--------|-------|
| C(19) | 14(1) | 14(1) | 11(1) | -1(1)  | -2(1)  | 0(1)  |
| C(20) | 15(1) | 25(1) | 11(1) | -3(1)  | 0(1)   | 1(1)  |
| C(21) | 14(1) | 21(1) | 14(1) | -4(1)  | 1(1)   | 3(1)  |
| C(22) | 13(1) | 17(1) | 15(1) | -2(1)  | 2(1)   | 0(1)  |
| C(23) | 14(1) | 18(1) | 16(1) | -1(1)  | -1(1)  | 2(1)  |
| C(24) | 15(1) | 17(1) | 13(1) | 1(1)   | 0(1)   | 0(1)  |
| C(25) | 18(1) | 27(1) | 14(1) | -3(1)  | -4(1)  | 4(1)  |
| C(26) | 24(1) | 33(1) | 19(1) | 0(1)   | -6(1)  | 7(1)  |
| C(27) | 31(2) | 42(2) | 37(2) | -2(1)  | -15(1) | 7(1)  |
| C(28) | 25(1) | 38(2) | 28(1) | 3(1)   | 1(1)   | 5(1)  |
| C(29) | 30(2) | 58(2) | 40(2) | 3(2)   | -6(1)  | 4(2)  |
| C(30) | 38(2) | 62(2) | 33(2) | -9(2)  | -5(1)  | 21(2) |
| C(31) | 61(3) | 63(3) | 86(3) | -33(3) | -37(2) | 25(2) |
| C(32) | 26(1) | 42(2) | 17(1) | -10(1) | -6(1)  | 10(1) |
| C(33) | 19(1) | 13(1) | 18(1) | -1(1)  | -3(1)  | -2(1) |
| C(34) | 22(1) | 13(1) | 16(1) | -1(1)  | -2(1)  | 2(1)  |
| C(35) | 24(1) | 24(1) | 20(1) | -3(1)  | -1(1)  | -5(1) |
| C(36) | 27(1) | 37(2) | 27(1) | -2(1)  | -10(1) | -7(1) |

**Table S8.** Hydrogen coordinates ( $\times 10^4$ ) and isotropic displacement parameters ( $\text{\AA}^2 \times 10^3$ ) for  $\text{C}_{36}\text{H}_{55}\text{NO}_4\text{S}$ .

|       | x    | y     | z    | U(eq) |
|-------|------|-------|------|-------|
| H(2)  | 5101 | 2934  | 9528 | 26    |
| H(3)  | 3415 | 2914  | 9478 | 29    |
| H(5)  | 3145 | -3300 | 8726 | 32    |
| H(6)  | 4822 | -3283 | 8745 | 27    |
| H(7A) | 1995 | -68   | 9554 | 55    |
| H(7B) | 1733 | -1635 | 8922 | 55    |
| H(7C) | 1687 | 1005  | 8838 | 55    |
| H(8)  | 8560 | 4554  | 8142 | 21    |
| H(9A) | 7952 | 3010  | 8972 | 21    |
| H(9B) | 8274 | 577   | 8809 | 21    |

|        |       |       |      |     |
|--------|-------|-------|------|-----|
| H(12A) | 7953  | 770   | 6851 | 20  |
| H(12B) | 7746  | 3193  | 7086 | 20  |
| H(13A) | 9066  | 47    | 7914 | 23  |
| H(13B) | 9431  | 2163  | 7582 | 23  |
| H(14)  | 6311  | 4169  | 8574 | 17  |
| H(15A) | 5348  | 5022  | 7449 | 17  |
| H(15B) | 4665  | 3680  | 7809 | 17  |
| H(16)  | 4894  | 356   | 7293 | 14  |
| H(17)  | 6191  | 2880  | 6733 | 15  |
| H(18)  | 4485  | 3861  | 6349 | 14  |
| H(20A) | 5083  | 1959  | 5549 | 21  |
| H(20B) | 4811  | -594  | 5382 | 21  |
| H(21A) | 6423  | -241  | 6143 | 21  |
| H(21B) | 5700  | -1679 | 6446 | 21  |
| H(22A) | 3259  | 4598  | 6826 | 19  |
| H(22B) | 3047  | 2010  | 6924 | 19  |
| H(23A) | 2271  | 4537  | 5792 | 20  |
| H(23B) | 1931  | 2080  | 5931 | 20  |
| H(24)  | 3379  | 3313  | 5284 | 19  |
| H(25)  | 2030  | -374  | 5085 | 26  |
| H(26A) | 1398  | 3362  | 4767 | 33  |
| H(26B) | 1990  | 3308  | 4226 | 33  |
| H(27A) | 364   | 459   | 4238 | 50  |
| H(27B) | 982   | 251   | 3712 | 50  |
| H(28A) | -56   | 4244  | 3839 | 38  |
| H(28B) | 415   | 3675  | 3257 | 38  |
| H(29)  | -1309 | 1623  | 3459 | 55  |
| H(30A) | -1218 | 4588  | 2436 | 71  |
| H(30B) | -1547 | 5312  | 3069 | 71  |
| H(30C) | -2213 | 3598  | 2556 | 71  |
| H(31A) | -434  | 720   | 2446 | 122 |
| H(31B) | -1538 | -32   | 2427 | 122 |
| H(31C) | -606  | -1002 | 2976 | 122 |
| H(32A) | 3394  | 575   | 4338 | 46  |
| H(32B) | 2477  | -1098 | 4094 | 46  |
| H(32C) | 3358  | -1665 | 4735 | 46  |

|        |       |       |       |    |
|--------|-------|-------|-------|----|
| H(33A) | 3553  | -2491 | 5805  | 27 |
| H(33B) | 3000  | -1217 | 6263  | 27 |
| H(33C) | 4134  | -1972 | 6551  | 27 |
| H(34A) | 7682  | -2112 | 7923  | 28 |
| H(34B) | 7232  | -2470 | 7152  | 28 |
| H(34C) | 6509  | -2421 | 7616  | 28 |
| H(36A) | 11071 | 6460  | 9849  | 51 |
| H(36B) | 11346 | 4122  | 9589  | 51 |
| H(36C) | 10651 | 4209  | 10070 | 51 |

---

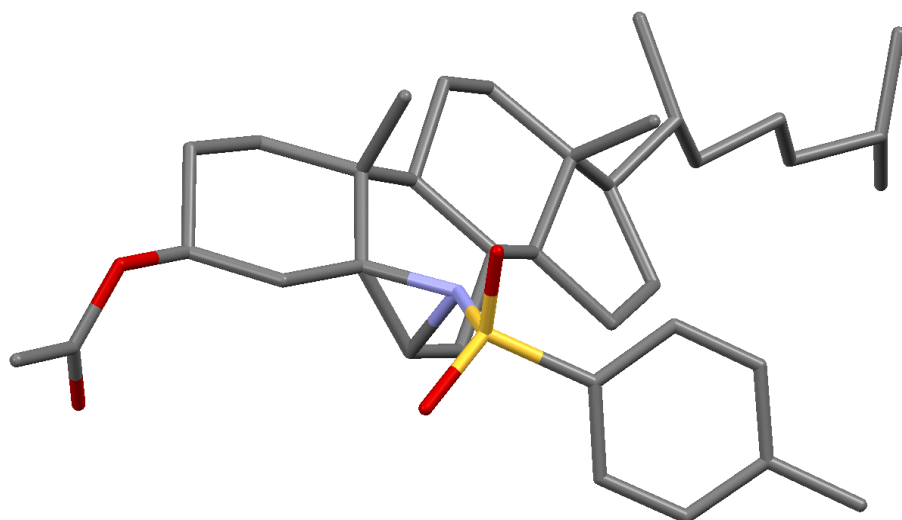

**10ss** m.p. =  
157-158 °C

**Computational Details:** All the geometries were optimized using the (U)M06(66, 67) functional in Gaussian09 with the 6-31G(d,p) basis on the main group elements and LANL2DZ basis set and pseudopotential on Rh. Solvent effects were incorporated modeled using the CPCM implicit model for 2,2,2-trifluoroethanol (TFE). Stationary points were characterized as minima or first-order saddle points by computing the Hessian matrix. Singlet–triplet spin-crossing points, also called minimum energy crossing points (MECP), were located using the algorithm developed by Harvey et al. in conjunction with Gaussian 09.(68, 69) Vibrational frequency analysis on the MECP structure was performed to estimate

thermochemical data. Electronic energies were further refined using the 6-311++G(2d,2p) basis on the main group elements and LANL2TZ(f) basis set and pseudopotential on Rh.

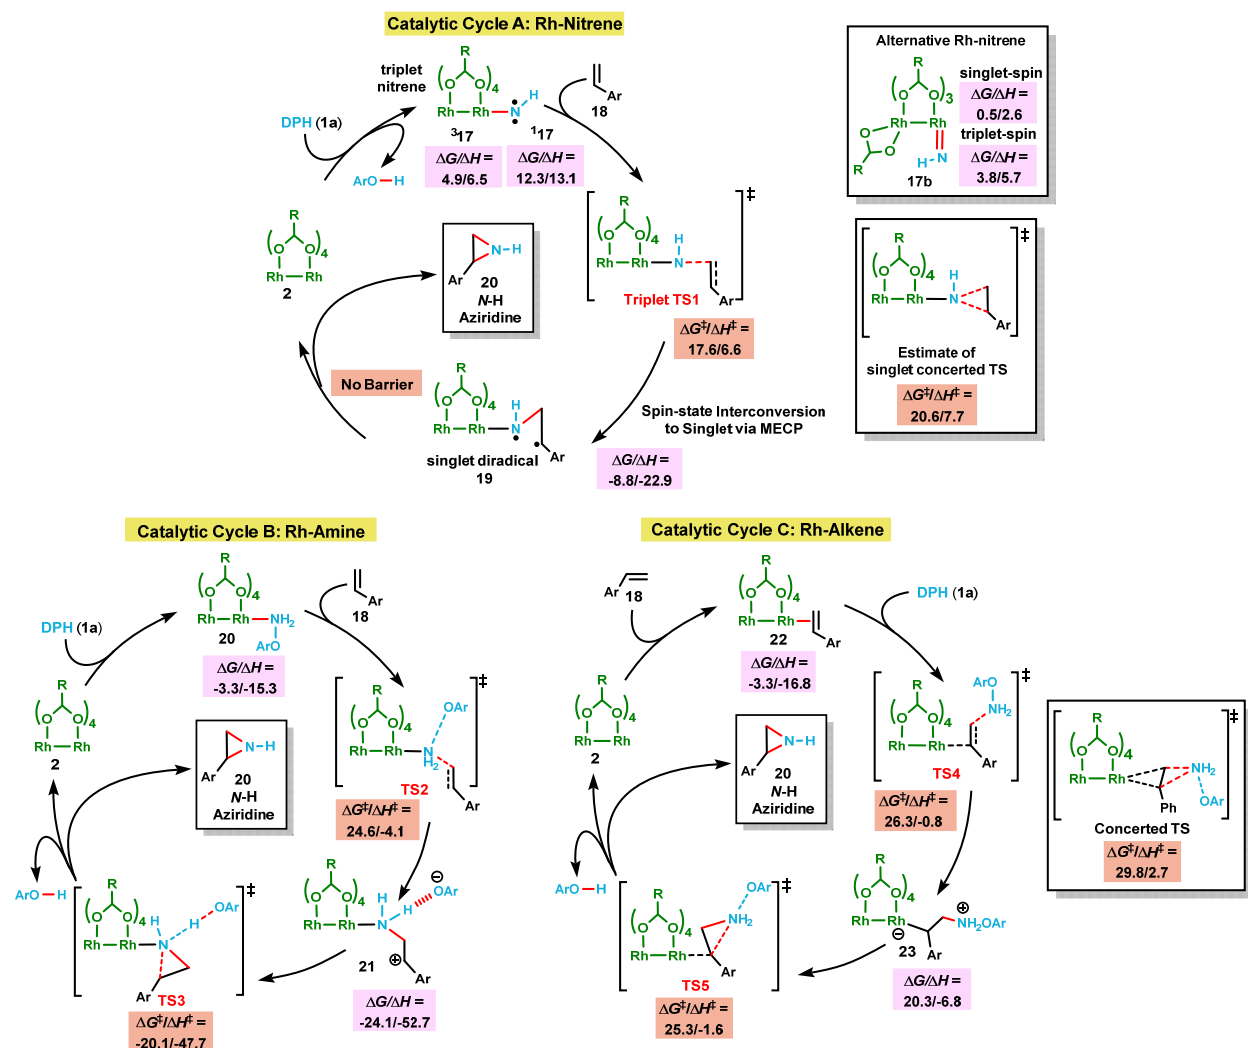

**Figure S5.** DFT examined pathways for N-H aziridination of styrene. R = esp ligands. Solvent = trifluoroethanol. Energies relative to **2**, **18**, and **1a**. Energies in kcal/mol. MECP = minimum energy crossing point.

### Notes on the catalytic cycles shown in Figure S5.

**Note 1.** We also examined whether a transition state similar to **TS1** occurs on the singlet energy surface.

All attempts to locate this transition state failed. We have estimated the energy of this transition state by evaluating the singlet-spin open-shell energy on the geometry of triplet-spin **TS1**. This singlet free energy is 27.5 kcal/mol, which is ~10 kcal/mol higher than the triplet-spin energy.

**Note 2.** The insert of Catalytic Cycle A shows the concerted transition state for the reaction between **17** and styrene. The concerted transition state was located for a model system with formate ligands as replacements for esp ligands. When esp ligands were used we were unable to converge on the transition state. To estimate the energy of the concerted reaction pathway with esp ligands we constrained the forming C-N bond lengths to be identical to the transition state located with the model formate ligands. The free energy of this structure is 20.6 kcal/mol.

**Note 3.** In addition to the rhodium nitrene species **317** we also identified an alternative rhodium nitrene species **17b** (shown in the insert of Catalytic Cycle A). While **17b** is thermodynamically feasible, esp ligand migration in catalyst **2** requires 20.5 kcal/mol of free energy and is unlikely. Interestingly, for **17b** the singlet-spin state is more stable than the triplet-spin state. So far we were unable to locate a transition state leading from singlet **17b** to aziridine **20**.

**Note 4.** For Catalytic Cycle B the mechanism begins with **1a** coordinating to  $\text{Rh}_2(\text{esp})_2$  to give **20**. Next, styrene acts as a  $\pi$  nucleophile to form the first C-N bond with expulsion of an aryl oxide leaving group that remains hydrogen-bonded. The zwitterionic intermediate **21** formed from **TS2** then undergoes ring-closure with only a few kcal/mol barrier (**TS3**).

**Note 5.** Catalytic Cycle C shows the possibility of initial styrene coordination to  $\text{Rh}_2(\text{esp})_2$  and electrophilic  $\pi$ -activation. Subsequent nitrogen atom nucleophilic addition of **1a** to **22** via **TS4** forms the first C-N bond and the corresponding rhodium-alkyl intermediate **23**. It is also possible that this nucleophilic attack involves hydrogen bonding by a second molecule of **1a**. The second C-N bond forming transition state, **TS5**, results in aziridine **20**. The insert of Catalytic Cycle C shows the possibility of concerted nitrene transfer from **1a** after styrene  $\pi$ -coordination to  $\text{Rh}_2(\text{esp})_2$ .

## XYZ Coordinates and Thermochemical Data (Energies in Hartree)

### Cycle A: Rh-Nitrene

#### <sup>1</sup>17 (Singlet 17)

Temperature = 298.150 K

Pressure = 1.00000 Atm

#### 6-31G(d,p)[LANL2DZ]

Electronic Energy = -2118.58361471

Electronic and Zero-Point Energy = -2117.900287

Enthalpy = -2117.856144

Free Energy = -2117.971047

#### 6-311++G(2d,2p)[LANL2TZ(f)]

Electronic Energy = -2119.12880183

|    |             |              |              |
|----|-------------|--------------|--------------|
| Rh | 0.072291000 | 0.004933000  | -1.302466000 |
| C  | 1.850962000 | -1.903999000 | -0.074631000 |
| C  | 2.900726000 | -3.009629000 | 0.000929000  |
| C  | 2.266489000 | -4.229453000 | 0.674873000  |
| H  | 1.903097000 | -3.990015000 | 1.679288000  |
| H  | 3.013966000 | -5.027551000 | 0.757422000  |
| H  | 1.428391000 | -4.614725000 | 0.082419000  |
| C  | 3.380388000 | -3.388858000 | -1.394800000 |
| H  | 2.552512000 | -3.759976000 | -2.008198000 |
| H  | 4.129958000 | -4.185775000 | -1.312426000 |
| H  | 3.835463000 | -2.540800000 | -1.916140000 |
| O  | 1.529822000 | -1.445169000 | -1.203172000 |
| O  | 1.374254000 | 1.483628000  | 1.157104000  |
| C  | 5.764609000 | 1.222427000  | -0.426808000 |
| H  | 6.186765000 | 2.172625000  | -0.753073000 |
| C  | 4.700358000 | 1.217364000  | 0.478463000  |
| C  | 4.085113000 | 2.492901000  | 0.983608000  |
| H  | 4.833850000 | 3.297804000  | 0.998032000  |
| H  | 3.743236000 | 2.353025000  | 2.017268000  |
| C  | 2.890639000 | 3.011573000  | 0.144279000  |
| C  | 3.351035000 | 3.444443000  | -1.242236000 |
| H  | 3.802659000 | 2.618355000  | -1.800590000 |
| H  | 4.098203000 | 4.241617000  | -1.141015000 |
| H  | 2.513400000 | 3.833488000  | -1.830919000 |
| C  | 2.263270000 | 4.203980000  | 0.871214000  |
| H  | 1.409636000 | 4.602208000  | 0.309906000  |
| H  | 3.006383000 | 5.005057000  | 0.965099000  |
| H  | 1.922162000 | 3.928476000  | 1.874096000  |
| C  | 1.842830000 | 1.903257000  | 0.046713000  |
| O  | 1.517016000 | 1.482967000  | -1.096840000 |
| O  | 1.364740000 | -1.518372000 | 1.040144000  |
| C  | 4.081111000 | -2.518487000 | 0.876029000  |



|    |              |              |              |
|----|--------------|--------------|--------------|
| H  | 3.724177000  | -2.417898000 | 1.909237000  |
| H  | 4.830938000  | -3.322392000 | 0.871362000  |
| C  | 4.699451000  | -1.223714000 | 0.426769000  |
| C  | 5.764684000  | -1.191716000 | -0.477041000 |
| H  | 6.187504000  | -2.127457000 | -0.841852000 |
| C  | 6.295398000  | 0.024580000  | -0.896656000 |
| H  | 7.133018000  | 0.038994000  | -1.590488000 |
| C  | 4.194115000  | -0.012700000 | 0.903239000  |
| H  | 3.379430000  | -0.027466000 | 1.627599000  |
| O  | -1.367901000 | 1.494381000  | -1.319624000 |
| C  | -4.099952000 | 2.495488000  | -1.057516000 |
| H  | -3.792715000 | 2.360530000  | -2.102766000 |
| H  | -4.848210000 | 3.300773000  | -1.042502000 |
| C  | -4.696430000 | 1.217361000  | -0.537490000 |
| C  | -5.728907000 | 1.216765000  | 0.403897000  |
| H  | -6.139684000 | 2.164740000  | 0.750481000  |
| C  | -6.243941000 | 0.015680000  | 0.882912000  |
| H  | -7.057219000 | 0.025304000  | 1.605159000  |
| C  | -4.205347000 | -0.009458000 | -0.988102000 |
| H  | -3.415930000 | -0.020037000 | -1.739943000 |
| O  | -1.509711000 | -1.466890000 | 1.016006000  |
| O  | -1.372253000 | -1.519321000 | -1.237159000 |
| C  | -5.729686000 | -1.197741000 | 0.435167000  |
| H  | -6.141946000 | -2.135942000 | 0.805734000  |
| C  | -4.696431000 | -1.223830000 | -0.505208000 |
| C  | -4.100035000 | -2.515337000 | -0.991258000 |
| H  | -4.853104000 | -3.316032000 | -0.969056000 |
| H  | -3.779671000 | -2.403066000 | -2.035159000 |
| C  | -2.889748000 | -3.022377000 | -0.167108000 |
| C  | -3.322510000 | -3.426028000 | 1.237100000  |
| H  | -3.763260000 | -2.588992000 | 1.787683000  |
| H  | -4.071808000 | -4.224456000 | 1.167034000  |
| H  | -2.474130000 | -3.804649000 | 1.817229000  |
| C  | -2.284627000 | -4.232056000 | -0.883775000 |
| H  | -1.431853000 | -4.634650000 | -0.324785000 |
| H  | -3.039564000 | -5.023912000 | -0.959926000 |
| H  | -1.950012000 | -3.973221000 | -1.893208000 |
| C  | -1.836862000 | -1.915014000 | -0.134168000 |
| O  | -1.501988000 | 1.453589000  | 0.926067000  |
| C  | -1.831654000 | 1.901317000  | -0.219484000 |
| C  | -2.877360000 | 3.012867000  | -0.257825000 |
| C  | -2.274204000 | 4.205882000  | -1.003607000 |
| H  | -1.963815000 | 3.929765000  | -2.016179000 |
| H  | -3.022489000 | 5.004343000  | -1.075029000 |
| H  | -1.405066000 | 4.606629000  | -0.468896000 |
| C  | -3.289043000 | 3.440557000  | 1.145426000  |
| H  | -2.430525000 | 3.822049000  | 1.708593000  |
| H  | -4.033910000 | 4.242776000  | 1.072859000  |
| H  | -3.728237000 | 2.614701000  | 1.713919000  |
| Rh | -0.062834000 | -0.014023000 | 1.133975000  |
| H  | -0.851946000 | -0.776988000 | 3.262306000  |

N -0.171291000 -0.038586000 2.995453000

### <sup>3</sup>17 (Triplet 17)

Temperature = 298.150 K

Pressure = 1.00000 Atm

#### 6-31G(d,p)[LANL2DZ]

Electronic Energy = -2118.59712915

Electronic and Zero-Point Energy = -2117.914039

Enthalpy = -2117.869849

Free Energy = -2117.986109

#### 6-311++G(2d,2p)[LANL2TZ(f)]

Electronic Energy = -2119.13918840

|    |             |              |              |
|----|-------------|--------------|--------------|
| Rh | 0.061945000 | -0.006262000 | -1.285911000 |
| C  | 1.852736000 | -1.894357000 | -0.010630000 |
| C  | 2.902817000 | -3.001516000 | 0.065946000  |
| C  | 2.274929000 | -4.207388000 | 0.770220000  |
| H  | 1.927356000 | -3.948550000 | 1.775401000  |
| H  | 3.019979000 | -5.007616000 | 0.855841000  |
| H  | 1.426036000 | -4.599276000 | 0.197468000  |
| C  | 3.365227000 | -3.409374000 | -1.327544000 |
| H  | 2.529136000 | -3.789894000 | -1.923842000 |
| H  | 4.114115000 | -4.206515000 | -1.239651000 |
| H  | 3.815645000 | -2.572640000 | -1.870905000 |
| O  | 1.515523000 | -1.468555000 | -1.151755000 |
| O  | 1.379301000 | 1.507832000  | 1.144319000  |
| C  | 5.768932000 | 1.217978000  | -0.467925000 |
| H  | 6.188312000 | 2.162223000  | -0.814460000 |
| C  | 4.711453000 | 1.228541000  | 0.445248000  |
| C  | 4.097456000 | 2.511783000  | 0.931774000  |
| H  | 4.844034000 | 3.318747000  | 0.926952000  |
| H  | 3.762346000 | 2.389994000  | 1.970049000  |
| C  | 2.896593000 | 3.013578000  | 0.091008000  |
| C  | 3.345475000 | 3.415954000  | -1.308404000 |
| H  | 3.791705000 | 2.577415000  | -1.852374000 |
| H  | 4.094416000 | 4.213949000  | -1.230432000 |
| H  | 2.503556000 | 3.793702000  | -1.898334000 |
| C  | 2.275964000 | 4.221388000  | 0.798510000  |
| H  | 1.421375000 | 4.612104000  | 0.233652000  |
| H  | 3.022474000 | 5.021132000  | 0.874045000  |
| H  | 1.938876000 | 3.965562000  | 1.808005000  |
| C  | 1.847785000 | 1.907252000  | 0.027217000  |
| O  | 1.508835000 | 1.459736000  | -1.103940000 |
| O  | 1.391339000 | -1.481408000 | 1.101456000  |
| C  | 4.096277000 | -2.499072000 | 0.916227000  |
| H  | 3.753632000 | -2.379997000 | 1.952221000  |
| H  | 4.845331000 | -3.303842000 | 0.915116000  |

|    |              |              |              |
|----|--------------|--------------|--------------|
| C  | 4.710743000  | -1.213060000 | 0.437558000  |
| C  | 5.768700000  | -1.196889000 | -0.475062000 |
| H  | 6.188561000  | -2.139004000 | -0.826755000 |
| C  | 6.296172000  | 0.011835000  | -0.920230000 |
| H  | 7.128430000  | 0.013831000  | -1.620655000 |
| C  | 4.209154000  | 0.006495000  | 0.896039000  |
| H  | 3.399954000  | 0.003801000  | 1.626352000  |
| O  | -1.381455000 | 1.497453000  | -1.252960000 |
| C  | -4.094755000 | 2.511943000  | -1.026373000 |
| H  | -3.771985000 | 2.387138000  | -2.068097000 |
| H  | -4.846084000 | 3.314541000  | -1.015562000 |
| C  | -4.695997000 | 1.227191000  | -0.528182000 |
| C  | -5.734013000 | 1.213669000  | 0.407188000  |
| H  | -6.146275000 | 2.156775000  | 0.765150000  |
| C  | -6.252674000 | 0.006257000  | 0.866006000  |
| H  | -7.069606000 | 0.006276000  | 1.584229000  |
| C  | -4.204920000 | 0.006413000  | -0.994686000 |
| H  | -3.411117000 | 0.006833000  | -1.741747000 |
| O  | -1.503052000 | -1.441026000 | 0.948209000  |
| O  | -1.371821000 | -1.507609000 | -1.302467000 |
| C  | -5.737286000 | -1.201163000 | 0.403443000  |
| H  | -6.151203000 | -2.144417000 | 0.759156000  |
| C  | -4.700010000 | -1.214356000 | -0.532556000 |
| C  | -4.101893000 | -2.498999000 | -1.034490000 |
| H  | -4.851323000 | -3.303151000 | -1.013739000 |
| H  | -3.789854000 | -2.376445000 | -2.079850000 |
| C  | -2.883189000 | -3.006996000 | -0.223310000 |
| C  | -3.303102000 | -3.416188000 | 1.183100000  |
| H  | -3.741594000 | -2.581748000 | 1.739407000  |
| H  | -4.050617000 | -4.216635000 | 1.117003000  |
| H  | -2.448650000 | -3.793608000 | 1.755182000  |
| C  | -2.281735000 | -4.212466000 | -0.950176000 |
| H  | -1.418007000 | -4.610536000 | -0.404724000 |
| H  | -3.032912000 | -5.008763000 | -1.016374000 |
| H  | -1.963388000 | -3.950877000 | -1.964142000 |
| C  | -1.833240000 | -1.897683000 | -0.190914000 |
| O  | -1.489313000 | 1.496947000  | 0.999617000  |
| C  | -1.834649000 | 1.917994000  | -0.149605000 |
| C  | -2.885831000 | 3.024775000  | -0.204191000 |
| C  | -2.274475000 | 4.224404000  | -0.932940000 |
| H  | -1.941312000 | 3.953775000  | -1.939873000 |
| H  | -3.024814000 | 5.019830000  | -1.017244000 |
| H  | -1.418980000 | 4.627676000  | -0.378387000 |
| C  | -3.321550000 | 3.445195000  | 1.194055000  |
| H  | -2.474035000 | 3.829416000  | 1.771668000  |
| H  | -4.070496000 | 4.243038000  | 1.113504000  |
| H  | -3.763444000 | 2.614267000  | 1.753105000  |
| Rh | -0.048181000 | 0.027216000  | 1.147084000  |
| H  | -0.823039000 | -1.164277000 | 3.291146000  |
| N  | -0.314513000 | -0.291253000 | 3.055490000  |

### <sup>1</sup>17b (Singlet 17b)

Temperature = 298.150 K

Pressure = 1.00000 Atm

#### 6-31G(d,p)[LANL2DZ]

Electronic Energy = -2118.59853632

Electronic and Zero-Point Energy = -2117.915082

Enthalpy = -2117.870783

Free Energy = -2117.987822

#### 6-311++G(2d,2p)[LANL2TZ(f)]

Electronic Energy = -2119.14589136

|    |             |             |              |
|----|-------------|-------------|--------------|
| Rh | 1.139290000 | 1.897241000 | 0.703962000  |
| C  | 3.040027000 | 3.656256000 | 2.039778000  |
| C  | 4.239839000 | 3.946524000 | 2.940383000  |
| C  | 3.736657000 | 4.720099000 | 4.161446000  |
| H  | 3.239980000 | 5.650380000 | 3.868191000  |
| H  | 4.583938000 | 4.967045000 | 4.812673000  |
| H  | 3.029306000 | 4.117766000 | 4.744465000  |
| C  | 4.920436000 | 2.661222000 | 3.395336000  |
| H  | 4.229031000 | 2.030399000 | 3.964600000  |
| H  | 5.769036000 | 2.910942000 | 4.044799000  |
| H  | 5.295319000 | 2.074938000 | 2.550525000  |
| O  | 2.842209000 | 2.444889000 | 1.708071000  |
| O  | 1.953246000 | 4.174928000 | -1.198844000 |
| C  | 6.426512000 | 3.145979000 | -1.608724000 |
| H  | 6.719280000 | 2.715455000 | -2.566052000 |
| C  | 5.265960000 | 3.920294000 | -1.528127000 |
| C  | 4.373853000 | 4.138404000 | -2.718950000 |
| H  | 4.962179000 | 4.110673000 | -3.647198000 |
| H  | 3.915180000 | 5.133446000 | -2.658664000 |
| C  | 3.245538000 | 3.090937000 | -2.882180000 |
| C  | 3.822143000 | 1.715213000 | -3.193704000 |
| H  | 4.465362000 | 1.349212000 | -2.386704000 |
| H  | 4.421101000 | 1.775799000 | -4.110814000 |
| H  | 3.025891000 | 0.980794000 | -3.353033000 |
| C  | 2.326743000 | 3.533717000 | -4.026651000 |
| H  | 1.506946000 | 2.820126000 | -4.173145000 |
| H  | 2.904093000 | 3.579465000 | -4.957812000 |
| H  | 1.898538000 | 4.523203000 | -3.835734000 |
| C  | 2.400788000 | 3.052925000 | -1.612433000 |
| O  | 2.183050000 | 1.930844000 | -1.073440000 |
| O  | 2.316072000 | 4.619863000 | 1.672576000  |
| C  | 5.234270000 | 4.843293000 | 2.161044000  |
| H  | 4.755856000 | 5.816616000 | 1.989067000  |
| H  | 6.092543000 | 5.017318000 | 2.825843000  |
| C  | 5.691828000 | 4.266929000 | 0.850656000  |
| C  | 6.846334000 | 3.487635000 | 0.745279000  |

|    |              |              |              |
|----|--------------|--------------|--------------|
| H  | 7.464621000  | 3.321568000  | 1.627208000  |
| C  | 7.213279000  | 2.937031000  | -0.479615000 |
| H  | 8.121155000  | 2.342640000  | -0.555485000 |
| C  | 4.928892000  | 4.485336000  | -0.297242000 |
| H  | 4.039255000  | 5.110470000  | -0.227524000 |
| O  | 1.000543000  | -0.316278000 | 0.686440000  |
| C  | -1.543313000 | -1.981435000 | 0.988617000  |
| H  | -0.715231000 | -2.380744000 | 1.590345000  |
| H  | -2.160066000 | -2.838275000 | 0.681401000  |
| C  | -2.352421000 | -1.022308000 | 1.817519000  |
| C  | -3.732494000 | -0.881731000 | 1.648075000  |
| H  | -4.251581000 | -1.505449000 | 0.920554000  |
| C  | -4.442994000 | 0.035832000  | 2.415806000  |
| H  | -5.520145000 | 0.125508000  | 2.293149000  |
| C  | -1.715232000 | -0.227960000 | 2.770307000  |
| H  | -0.641813000 | -0.340135000 | 2.917561000  |
| O  | -0.441888000 | 4.145607000  | 2.168662000  |
| O  | 0.123638000  | 1.983996000  | 2.483693000  |
| C  | -3.784452000 | 0.833876000  | 3.348252000  |
| H  | -4.352797000 | 1.536906000  | 3.956373000  |
| C  | -2.402324000 | 0.723722000  | 3.526564000  |
| C  | -1.656165000 | 1.577128000  | 4.519192000  |
| H  | -2.247066000 | 1.675383000  | 5.442001000  |
| H  | -0.724665000 | 1.068067000  | 4.797728000  |
| C  | -1.308179000 | 3.020527000  | 4.086751000  |
| C  | -2.564472000 | 3.872498000  | 3.916096000  |
| H  | -3.199123000 | 3.503226000  | 3.102663000  |
| H  | -3.148866000 | 3.847656000  | 4.844142000  |
| H  | -2.305905000 | 4.913399000  | 3.701231000  |
| C  | -0.411493000 | 3.640742000  | 5.167507000  |
| H  | -0.129747000 | 4.666508000  | 4.903609000  |
| H  | -0.950911000 | 3.665607000  | 6.121969000  |
| H  | 0.503068000  | 3.051101000  | 5.306833000  |
| C  | -0.489172000 | 3.041028000  | 2.802435000  |
| O  | -0.489240000 | 0.998981000  | -0.209423000 |
| C  | -0.097327000 | -0.188183000 | 0.066858000  |
| C  | -0.942999000 | -1.383639000 | -0.313373000 |
| C  | -0.043138000 | -2.437051000 | -0.961421000 |
| H  | 0.761761000  | -2.745089000 | -0.286528000 |
| H  | -0.640484000 | -3.320961000 | -1.214689000 |
| H  | 0.406749000  | -2.056841000 | -1.886355000 |
| C  | -2.046829000 | -0.972715000 | -1.280901000 |
| H  | -1.625957000 | -0.555686000 | -2.202705000 |
| H  | -2.642487000 | -1.855038000 | -1.546241000 |
| H  | -2.715944000 | -0.224892000 | -0.844208000 |
| Rh | 0.593269000  | 4.295454000  | 0.368359000  |
| H  | -1.122798000 | 3.249379000  | -0.877911000 |
| N  | -0.848717000 | 4.232630000  | -0.668709000 |

**<sup>3</sup>17b (Triplet 17b)**

Temperature = 298.150 K  
Pressure = 1.00000 Atm

6-31G(d,p)[LANL2DZ]

Electronic Energy = -2118.59582357  
Electronic and Zero-Point Energy = -2117.912607  
Enthalpy = -2117.868387  
Free Energy = -2117.985076

6-311++G(2d,2p)[LANL2TZ(f)]

Electronic Energy = -2119.14057889

|    |             |             |              |
|----|-------------|-------------|--------------|
| Rh | 1.182222000 | 1.894858000 | 0.737534000  |
| C  | 3.085923000 | 3.648007000 | 2.077866000  |
| C  | 4.290863000 | 3.967431000 | 2.958036000  |
| C  | 3.801181000 | 4.754335000 | 4.176032000  |
| H  | 3.290295000 | 5.675700000 | 3.879177000  |
| H  | 4.658171000 | 5.019106000 | 4.807007000  |
| H  | 3.111405000 | 4.154087000 | 4.781570000  |
| C  | 4.988489000 | 2.693521000 | 3.418875000  |
| H  | 4.310161000 | 2.064556000 | 4.005673000  |
| H  | 5.843337000 | 2.959284000 | 4.053372000  |
| H  | 5.356787000 | 2.100034000 | 2.576387000  |
| O  | 2.901223000 | 2.442506000 | 1.735094000  |
| O  | 1.959984000 | 4.185150000 | -1.214932000 |
| C  | 6.434073000 | 3.137708000 | -1.615178000 |
| H  | 6.723532000 | 2.701945000 | -2.571152000 |
| C  | 5.272704000 | 3.910816000 | -1.535338000 |
| C  | 4.381315000 | 4.123839000 | -2.727878000 |
| H  | 4.971791000 | 4.088668000 | -3.654625000 |
| H  | 3.926399000 | 5.120983000 | -2.674047000 |
| C  | 3.247917000 | 3.080769000 | -2.885579000 |
| C  | 3.820077000 | 1.700704000 | -3.185637000 |
| H  | 4.461105000 | 1.338594000 | -2.375152000 |
| H  | 4.420059000 | 1.750747000 | -4.102904000 |
| H  | 3.021184000 | 0.967902000 | -3.339186000 |
| C  | 2.335817000 | 3.518332000 | -4.036320000 |
| H  | 1.512473000 | 2.807802000 | -4.178448000 |
| H  | 2.914853000 | 3.553258000 | -4.967070000 |
| H  | 1.911809000 | 4.511327000 | -3.854766000 |
| C  | 2.405368000 | 3.062265000 | -1.612029000 |
| O  | 2.200367000 | 1.942481000 | -1.055641000 |
| O  | 2.334379000 | 4.604111000 | 1.730864000  |
| C  | 5.263289000 | 4.862687000 | 2.148476000  |
| H  | 4.771881000 | 5.828527000 | 1.970462000  |
| H  | 6.129077000 | 5.055562000 | 2.798092000  |
| C  | 5.709398000 | 4.274171000 | 0.839374000  |
| C  | 6.865356000 | 3.496846000 | 0.733710000  |
| H  | 7.489667000 | 3.340439000 | 1.613119000  |
| C  | 7.226677000 | 2.937440000 | -0.488619000 |

|    |              |              |              |
|----|--------------|--------------|--------------|
| H  | 8.135407000  | 2.344422000  | -0.564888000 |
| C  | 4.939266000  | 4.482107000  | -0.305767000 |
| H  | 4.048888000  | 5.106765000  | -0.237409000 |
| O  | 1.002011000  | -0.340870000 | 0.691902000  |
| C  | -1.558228000 | -1.964966000 | 0.957159000  |
| H  | -0.728171000 | -2.377760000 | 1.546943000  |
| H  | -2.176940000 | -2.814404000 | 0.633864000  |
| C  | -2.365961000 | -1.023928000 | 1.807573000  |
| C  | -3.752115000 | -0.914935000 | 1.670371000  |
| H  | -4.272428000 | -1.546915000 | 0.950841000  |
| C  | -4.466362000 | -0.018057000 | 2.458903000  |
| H  | -5.547771000 | 0.047574000  | 2.360829000  |
| C  | -1.724053000 | -0.218039000 | 2.748114000  |
| H  | -0.644670000 | -0.303524000 | 2.867555000  |
| O  | -0.493870000 | 4.135540000  | 2.147912000  |
| O  | 0.159233000  | 2.005891000  | 2.523918000  |
| C  | -3.805131000 | 0.788667000  | 3.381294000  |
| H  | -4.374875000 | 1.474869000  | 4.007111000  |
| C  | -2.416764000 | 0.710489000  | 3.527537000  |
| C  | -1.674228000 | 1.573571000  | 4.514145000  |
| H  | -2.263129000 | 1.666250000  | 5.438876000  |
| H  | -0.735108000 | 1.077270000  | 4.789620000  |
| C  | -1.347747000 | 3.018795000  | 4.074008000  |
| C  | -2.618489000 | 3.843139000  | 3.880130000  |
| H  | -3.236943000 | 3.451386000  | 3.064676000  |
| H  | -3.212768000 | 3.818004000  | 4.802069000  |
| H  | -2.378522000 | 4.886328000  | 3.655230000  |
| C  | -0.479716000 | 3.666161000  | 5.162201000  |
| H  | -0.221575000 | 4.697360000  | 4.895032000  |
| H  | -1.029832000 | 3.683535000  | 6.110793000  |
| H  | 0.448729000  | 3.102164000  | 5.314640000  |
| C  | -0.506433000 | 3.046276000  | 2.802331000  |
| O  | -0.451894000 | 1.032226000  | -0.176743000 |
| C  | -0.087976000 | -0.172747000 | 0.075320000  |
| C  | -0.962170000 | -1.338951000 | -0.332455000 |
| C  | -0.086931000 | -2.388405000 | -1.020104000 |
| H  | 0.718374000  | -2.729688000 | -0.361893000 |
| H  | -0.701915000 | -3.254068000 | -1.293441000 |
| H  | 0.361288000  | -1.989351000 | -1.937849000 |
| C  | -2.068726000 | -0.882386000 | -1.275573000 |
| H  | -1.650752000 | -0.446707000 | -2.190044000 |
| H  | -2.682368000 | -1.746636000 | -1.558992000 |
| H  | -2.721122000 | -0.136804000 | -0.810455000 |
| Rh | 0.687741000  | 4.297627000  | 0.438575000  |
| H  | -1.263622000 | 2.995049000  | -0.808499000 |
| N  | -0.756072000 | 3.869340000  | -0.609524000 |

### Triplet TS1

Lowest Frequency Vibration = -302.8633 cm<sup>\*\*</sup>-1

Temperature = 298.150 K

Pressure = 1.00000 Atm

6-31G(d,p)[LANL2DZ]

Electronic Energy = -2427.99912310

Electronic and Zero-Point Energy = -2427.182492

Enthalpy = -2427.130504

Free Energy = -2427.265878

6-311++G(2d,2p)[LANL2TZ(f)]

Electronic Energy = -2428.62191107

|    |              |              |              |
|----|--------------|--------------|--------------|
| Rh | -0.655226000 | -1.905424000 | 0.688214000  |
| C  | 1.584316000  | -0.515506000 | 1.946186000  |
| C  | 2.702211000  | -0.294920000 | 2.963184000  |
| C  | 2.428346000  | 1.017966000  | 3.701457000  |
| H  | 2.390781000  | 1.866509000  | 3.009639000  |
| H  | 3.225865000  | 1.202096000  | 4.431559000  |
| H  | 1.477355000  | 0.973113000  | 4.246045000  |
| C  | 2.762039000  | -1.441942000 | 3.964367000  |
| H  | 1.822330000  | -1.527749000 | 4.520654000  |
| H  | 3.569733000  | -1.253393000 | 4.682795000  |
| H  | 2.953954000  | -2.402047000 | 3.474906000  |
| O  | 0.917745000  | -1.586722000 | 2.006523000  |
| O  | 1.133376000  | -0.787648000 | -1.630501000 |
| C  | 4.837952000  | -3.397979000 | -0.525149000 |
| H  | 5.039806000  | -4.211499000 | -1.221580000 |
| C  | 4.124738000  | -2.278678000 | -0.962654000 |
| C  | 3.581860000  | -2.181225000 | -2.361451000 |
| H  | 4.226531000  | -2.732469000 | -3.061124000 |
| H  | 3.583119000  | -1.131333000 | -2.682006000 |
| C  | 2.147827000  | -2.740167000 | -2.540850000 |
| C  | 2.129698000  | -4.252003000 | -2.350820000 |
| H  | 2.467024000  | -4.543127000 | -1.351029000 |
| H  | 2.795467000  | -4.717019000 | -3.088808000 |
| H  | 1.121673000  | -4.654370000 | -2.498154000 |
| C  | 1.661217000  | -2.395864000 | -3.950857000 |
| H  | 0.644037000  | -2.770582000 | -4.118575000 |
| H  | 2.319400000  | -2.867711000 | -4.690583000 |
| H  | 1.665419000  | -1.314883000 | -4.122832000 |
| C  | 1.228673000  | -2.053704000 | -1.532759000 |
| O  | 0.636355000  | -2.770504000 | -0.678314000 |
| O  | 1.413758000  | 0.417958000  | 1.096988000  |
| C  | 4.045041000  | -0.162145000 | 2.200795000  |
| H  | 4.029710000  | 0.781850000  | 1.640221000  |
| H  | 4.833894000  | -0.071659000 | 2.961440000  |
| C  | 4.350744000  | -1.295613000 | 1.261382000  |
| C  | 5.060763000  | -2.425997000 | 1.674381000  |
| H  | 5.436361000  | -2.480490000 | 2.695929000  |
| C  | 5.305206000  | -3.467789000 | 0.784116000  |
| H  | 5.870901000  | -4.337490000 | 1.111122000  |



|    |              |              |              |
|----|--------------|--------------|--------------|
| C  | 3.905135000  | -1.236084000 | -0.060588000 |
| H  | 3.367871000  | -0.349165000 | -0.397378000 |
| O  | -2.172217000 | -2.064384000 | -0.732349000 |
| C  | -4.801693000 | -1.407626000 | -1.831403000 |
| H  | -4.808276000 | -2.351810000 | -1.271440000 |
| H  | -5.593155000 | -1.477932000 | -2.591518000 |
| C  | -5.078063000 | -0.267179000 | -0.891430000 |
| C  | -5.750229000 | 0.885985000  | -1.305374000 |
| H  | -6.117913000 | 0.955038000  | -2.328896000 |
| C  | -5.968274000 | 1.932301000  | -0.413528000 |
| H  | -6.504050000 | 2.820252000  | -0.741900000 |
| C  | -4.644918000 | -0.344586000 | 0.433454000  |
| H  | -4.136393000 | -1.247840000 | 0.770994000  |
| O  | -1.388094000 | 1.084614000  | 1.071111000  |
| O  | -1.886452000 | -0.896586000 | 2.027278000  |
| C  | -5.514802000 | 1.843142000  | 0.899602000  |
| H  | -5.697438000 | 2.659659000  | 1.597907000  |
| C  | -4.842087000 | 0.699833000  | 1.338547000  |
| C  | -4.321097000 | 0.575381000  | 2.743180000  |
| H  | -4.954117000 | 1.146003000  | 3.437981000  |
| H  | -4.364930000 | -0.475746000 | 3.057121000  |
| C  | -2.869026000 | 1.077191000  | 2.946174000  |
| C  | -2.790277000 | 2.590144000  | 2.778953000  |
| H  | -3.111092000 | 2.910428000  | 1.782502000  |
| H  | -3.439052000 | 3.070914000  | 3.521988000  |
| H  | -1.766638000 | 2.949332000  | 2.935664000  |
| C  | -2.414875000 | 0.694220000  | 4.356404000  |
| H  | -1.390933000 | 1.036968000  | 4.547866000  |
| H  | -3.071722000 | 1.171296000  | 5.094039000  |
| H  | -2.452510000 | -0.389049000 | 4.508100000  |
| C  | -1.972157000 | 0.362308000  | 1.936449000  |
| O  | -1.658553000 | -0.057679000 | -1.630477000 |
| C  | -2.336305000 | -1.131175000 | -1.570555000 |
| C  | -3.456701000 | -1.308886000 | -2.594884000 |
| C  | -3.221186000 | -2.624255000 | -3.341157000 |
| H  | -3.194497000 | -3.474527000 | -2.652510000 |
| H  | -4.031549000 | -2.786148000 | -4.062414000 |
| H  | -2.276305000 | -2.597815000 | -3.897544000 |
| C  | -3.487260000 | -0.156639000 | -3.591550000 |
| H  | -2.546245000 | -0.093132000 | -4.148703000 |
| H  | -4.299601000 | -0.322623000 | -4.310401000 |
| H  | -3.655036000 | 0.806708000  | -3.099861000 |
| Rh | -0.092532000 | 0.238417000  | -0.312045000 |
| H  | -0.643404000 | 2.625578000  | -1.445114000 |
| N  | 0.133854000  | 2.081784000  | -1.029669000 |
| C  | 2.084976000  | 3.868679000  | 0.165211000  |
| C  | 0.817549000  | 3.587374000  | 0.561780000  |
| H  | -0.025258000 | 4.229007000  | 0.310409000  |
| H  | 0.635668000  | 2.820211000  | 1.309528000  |
| H  | 2.891413000  | 3.244350000  | 0.557676000  |
| C  | 2.488411000  | 4.891996000  | -0.784266000 |

|   |             |             |              |
|---|-------------|-------------|--------------|
| C | 1.563277000 | 5.649512000 | -1.523540000 |
| C | 3.856900000 | 5.131374000 | -0.987458000 |
| C | 1.995505000 | 6.616092000 | -2.419232000 |
| C | 4.288692000 | 6.101467000 | -1.882610000 |
| C | 3.359208000 | 6.849015000 | -2.601289000 |
| H | 0.496283000 | 5.469962000 | -1.403312000 |
| H | 4.583084000 | 4.545008000 | -0.425945000 |
| H | 1.266042000 | 7.190708000 | -2.985284000 |
| H | 5.353235000 | 6.273659000 | -2.022467000 |
| H | 3.693759000 | 7.606765000 | -3.305637000 |

## MECP

Temperature = 298.150 K

Pressure = 1.00000 Atm

### 6-31G(d,p)[LANL2DZ]

Electronic Energy = -2428.05471761

Electronic and Zero-Point Energy = -2427.234410

Enthalpy = -2427.183059

Free Energy = -2427.313661

### 6-311++G(2d,2p)[LANL2TZ(f)]

Electronic Energy = -2428.67191494

|    |              |              |              |
|----|--------------|--------------|--------------|
| Rh | 0.683998000  | 0.550334000  | -1.596736000 |
| C  | -1.163202000 | 2.277418000  | -0.147732000 |
| C  | -2.069559000 | 3.485764000  | 0.086042000  |
| C  | -1.554923000 | 4.244929000  | 1.311143000  |
| H  | -1.539708000 | 3.602608000  | 2.198596000  |
| H  | -2.206378000 | 5.103525000  | 1.515587000  |
| H  | -0.540053000 | 4.624853000  | 1.141317000  |
| C  | -2.074092000 | 4.410827000  | -1.124226000 |
| H  | -1.066385000 | 4.784188000  | -1.337029000 |
| H  | -2.722782000 | 5.272369000  | -0.920527000 |
| H  | -2.443063000 | 3.906421000  | -2.022973000 |
| O  | -0.617539000 | 2.144181000  | -1.278422000 |
| O  | -1.304423000 | -1.351007000 | -0.091077000 |
| C  | -5.047663000 | 0.174702000  | -2.490585000 |
| H  | -5.446735000 | -0.541614000 | -3.208581000 |
| C  | -4.300060000 | -0.285231000 | -1.403194000 |
| C  | -3.992863000 | -1.743446000 | -1.204429000 |
| H  | -4.793466000 | -2.362853000 | -1.635699000 |
| H  | -3.958137000 | -1.965235000 | -0.129374000 |
| C  | -2.665113000 | -2.228518000 | -1.839539000 |
| C  | -2.756266000 | -2.199392000 | -3.360669000 |
| H  | -2.950643000 | -1.191085000 | -3.740094000 |
| H  | -3.574140000 | -2.853891000 | -3.688409000 |
| H  | -1.827786000 | -2.558617000 | -3.817921000 |
| C  | -2.404593000 | -3.661177000 | -1.368573000 |

|   |              |              |              |
|---|--------------|--------------|--------------|
| H | -1.469612000 | -4.052055000 | -1.789109000 |
| H | -3.222324000 | -4.311796000 | -1.703406000 |
| H | -2.344888000 | -3.713387000 | -0.276268000 |
| C | -1.525026000 | -1.337115000 | -1.342545000 |
| O | -0.893393000 | -0.653307000 | -2.198392000 |
| O | -1.037873000 | 1.485158000  | 0.839186000  |
| C | -3.500413000 | 2.974868000  | 0.389431000  |
| H | -3.485193000 | 2.487148000  | 1.373900000  |
| H | -4.144909000 | 3.861897000  | 0.477735000  |
| C | -4.060184000 | 2.017554000  | -0.625935000 |
| C | -4.808620000 | 2.452861000  | -1.722305000 |
| H | -5.019718000 | 3.515776000  | -1.839992000 |
| C | -5.300251000 | 1.535230000  | -2.646991000 |
| H | -5.893631000 | 1.882265000  | -3.490289000 |
| C | -3.824664000 | 0.649183000  | -0.481371000 |
| H | -3.253559000 | 0.297979000  | 0.378044000  |
| O | 1.932902000  | -1.124216000 | -1.717939000 |
| C | 4.426114000  | -2.556656000 | -1.278611000 |
| H | 4.364468000  | -2.093467000 | -2.271749000 |
| H | 5.080754000  | -3.435218000 | -1.373000000 |
| C | 5.011339000  | -1.573499000 | -0.303056000 |
| C | 5.808883000  | -1.981922000 | 0.769521000  |
| H | 6.045039000  | -3.038842000 | 0.891273000  |
| C | 6.314258000  | -1.046511000 | 1.667821000  |
| H | 6.944859000  | -1.372823000 | 2.492045000  |
| C | 4.745509000  | -0.211110000 | -0.452385000 |
| H | 4.137571000  | 0.119072000  | -1.294401000 |
| O | 1.783290000  | 1.054938000  | 1.297269000  |
| O | 2.216095000  | 1.733271000  | -0.812341000 |
| C | 6.024252000  | 0.305956000  | 1.512077000  |
| H | 6.429104000  | 1.036508000  | 2.212105000  |
| C | 5.228510000  | 0.739680000  | 0.448516000  |
| C | 4.875428000  | 2.188942000  | 0.264011000  |
| H | 5.671402000  | 2.829480000  | 0.670729000  |
| H | 4.799083000  | 2.413225000  | -0.807686000 |
| C | 3.554677000  | 2.629429000  | 0.943193000  |
| C | 3.681412000  | 2.565557000  | 2.460362000  |
| H | 3.906872000  | 1.553587000  | 2.812190000  |
| H | 4.492127000  | 3.230771000  | 2.784273000  |
| H | 2.755919000  | 2.893566000  | 2.946249000  |
| C | 3.251640000  | 4.067674000  | 0.516038000  |
| H | 2.329248000  | 4.433078000  | 0.983247000  |
| H | 4.070922000  | 4.725021000  | 0.832185000  |
| H | 3.144054000  | 4.145351000  | -0.570450000 |
| C | 2.423932000  | 1.732838000  | 0.435529000  |
| O | 1.536792000  | -1.738688000 | 0.418624000  |
| C | 2.085023000  | -1.883821000 | -0.717404000 |
| C | 3.018317000  | -3.082429000 | -0.902493000 |
| C | 2.487122000  | -3.927255000 | -2.063763000 |
| H | 2.440364000  | -3.347691000 | -2.991180000 |
| H | 3.149128000  | -4.787035000 | -2.225014000 |

|    |              |              |              |
|----|--------------|--------------|--------------|
| H  | 1.483427000  | -4.313005000 | -1.844782000 |
| C  | 3.087425000  | -3.939739000 | 0.355182000  |
| H  | 2.101928000  | -4.342256000 | 0.613149000  |
| H  | 3.765484000  | -4.784774000 | 0.178895000  |
| H  | 3.459651000  | -3.376041000 | 1.216598000  |
| Rh | 0.215495000  | -0.162982000 | 0.692586000  |
| H  | 0.844743000  | -0.617592000 | 3.187579000  |
| N  | -0.062959000 | -0.578540000 | 2.721061000  |
| C  | -2.379790000 | 0.175487000  | 3.190839000  |
| C  | -0.930357000 | 0.279428000  | 3.463949000  |
| H  | -0.798322000 | 0.110460000  | 4.553315000  |
| H  | -0.651693000 | 1.345461000  | 3.330889000  |
| H  | -2.952099000 | 1.086671000  | 3.380016000  |
| C  | -3.120559000 | -0.961745000 | 2.828327000  |
| C  | -2.539035000 | -2.247281000 | 2.650867000  |
| C  | -4.533541000 | -0.841364000 | 2.697722000  |
| C  | -3.339904000 | -3.351199000 | 2.425642000  |
| C  | -5.318609000 | -1.947079000 | 2.440678000  |
| C  | -4.726390000 | -3.209643000 | 2.314165000  |
| H  | -1.455395000 | -2.329736000 | 2.693329000  |
| H  | -4.988032000 | 0.142130000  | 2.812359000  |
| H  | -2.886902000 | -4.333936000 | 2.317239000  |
| H  | -6.396354000 | -1.841283000 | 2.346701000  |
| H  | -5.345484000 | -4.082588000 | 2.122589000  |

### Singlet concerted TS

Lowest Frequency Vibration = -49.4218 cm<sup>\*\*</sup>-1

Temperature = 298.150 K

Pressure = 1.00000 Atm

#### 6-31G(d,p)[LANL2DZ]

Electronic Energy = -2427.99456675

Electronic and Zero-Point Energy = -2427.176312

Enthalpy = -2427.124772

Free Energy = -2427.257222

#### 6-311++G(2d,2p)[LANL2TZ(f)]

Electronic Energy = -2428.62136409

|    |             |              |              |
|----|-------------|--------------|--------------|
| Rh | 0.091751000 | 0.003562000  | -1.213616000 |
| C  | 1.930564000 | -1.780241000 | 0.161499000  |
| C  | 2.979481000 | -2.876582000 | 0.325529000  |
| C  | 2.340029000 | -4.013072000 | 1.126913000  |
| H  | 1.954993000 | -3.657641000 | 2.088371000  |
| H  | 3.088769000 | -4.790986000 | 1.323997000  |
| H  | 1.517217000 | -4.472603000 | 0.566124000  |
| C  | 3.439394000 | -3.399731000 | -1.028972000 |
| H  | 2.601352000 | -3.828582000 | -1.588388000 |
| H  | 4.187475000 | -4.187731000 | -0.875453000 |

|   |              |              |              |
|---|--------------|--------------|--------------|
| H | 3.890107000  | -2.613118000 | -1.642585000 |
| O | 1.541121000  | -1.472123000 | -0.995648000 |
| O | 1.546494000  | 1.777431000  | 0.790298000  |
| C | 5.930429000  | 1.164033000  | -0.713670000 |
| H | 6.368592000  | 2.042722000  | -1.186427000 |
| C | 4.848913000  | 1.320446000  | 0.157229000  |
| C | 4.246424000  | 2.673173000  | 0.421177000  |
| H | 5.008674000  | 3.456147000  | 0.299707000  |
| H | 3.893237000  | 2.725567000  | 1.458911000  |
| C | 3.069040000  | 3.052489000  | -0.511438000 |
| C | 3.538618000  | 3.182278000  | -1.955040000 |
| H | 3.952186000  | 2.243553000  | -2.337406000 |
| H | 4.319666000  | 3.950898000  | -2.011735000 |
| H | 2.715082000  | 3.483134000  | -2.611074000 |
| C | 2.481815000  | 4.386809000  | -0.042242000 |
| H | 1.638134000  | 4.688860000  | -0.674458000 |
| H | 3.249274000  | 5.167218000  | -0.111362000 |
| H | 2.137195000  | 4.330720000  | 0.995311000  |
| C | 1.979737000  | 1.987904000  | -0.387156000 |
| O | 1.585077000  | 1.401371000  | -1.432290000 |
| O | 1.520592000  | -1.253128000 | 1.250920000  |
| C | 4.170367000  | -2.303023000 | 1.134652000  |
| H | 3.814439000  | -2.062320000 | 2.145857000  |
| H | 4.904028000  | -3.115730000 | 1.235151000  |
| C | 4.816319000  | -1.095819000 | 0.511245000  |
| C | 5.899423000  | -1.223102000 | -0.362682000 |
| H | 6.312742000  | -2.211462000 | -0.562387000 |
| C | 6.455778000  | -0.099483000 | -0.966004000 |
| H | 7.306379000  | -0.208968000 | -1.635092000 |
| C | 4.319101000  | 0.183437000  | 0.772493000  |
| H | 3.493513000  | 0.297923000  | 1.476058000  |
| O | -1.317770000 | 1.555026000  | -1.194845000 |
| C | -4.028437000 | 2.607653000  | -0.830082000 |
| H | -3.808303000 | 2.361073000  | -1.876956000 |
| H | -4.769430000 | 3.419817000  | -0.838379000 |
| C | -4.586430000 | 1.397090000  | -0.134963000 |
| C | -5.522938000 | 1.506204000  | 0.896301000  |
| H | -5.889927000 | 2.490492000  | 1.186050000  |
| C | -6.000164000 | 0.366837000  | 1.537640000  |
| H | -6.739256000 | 0.461252000  | 2.330098000  |
| C | -4.153328000 | 0.123515000  | -0.508847000 |
| H | -3.439605000 | 0.027230000  | -1.327654000 |
| O | -1.321976000 | -1.155998000 | 1.361044000  |
| O | -1.367487000 | -1.455578000 | -0.871341000 |
| C | -5.543400000 | -0.893551000 | 1.163240000  |
| H | -5.926600000 | -1.783787000 | 1.661417000  |
| C | -4.607502000 | -1.029504000 | 0.134516000  |
| C | -4.075016000 | -2.373816000 | -0.277555000 |
| H | -4.829768000 | -3.154201000 | -0.104278000 |
| H | -3.856858000 | -2.369407000 | -1.353375000 |
| C | -2.793996000 | -2.822292000 | 0.471203000  |

|    |              |              |              |
|----|--------------|--------------|--------------|
| C  | -3.089742000 | -3.087642000 | 1.941826000  |
| H  | -3.483077000 | -2.198808000 | 2.446850000  |
| H  | -3.836592000 | -3.887072000 | 2.022261000  |
| H  | -2.184210000 | -3.411883000 | 2.469517000  |
| C  | -2.266881000 | -4.101759000 | -0.182670000 |
| H  | -1.365188000 | -4.460705000 | 0.327320000  |
| H  | -3.029143000 | -4.886793000 | -0.110031000 |
| H  | -2.031248000 | -3.943397000 | -1.239560000 |
| C  | -1.741212000 | -1.731153000 | 0.298999000  |
| O  | -1.320159000 | 1.720664000  | 1.056619000  |
| C  | -1.706131000 | 2.066966000  | -0.108973000 |
| C  | -2.741396000 | 3.187521000  | -0.189677000 |
| C  | -2.190871000 | 4.283338000  | -1.105218000 |
| H  | -1.962537000 | 3.894356000  | -2.102327000 |
| H  | -2.935512000 | 5.082268000  | -1.205409000 |
| H  | -1.279077000 | 4.724886000  | -0.685691000 |
| C  | -3.038308000 | 3.773371000  | 1.185329000  |
| H  | -2.134240000 | 4.197416000  | 1.635627000  |
| H  | -3.777997000 | 4.577190000  | 1.082103000  |
| H  | -3.439731000 | 3.023331000  | 1.873908000  |
| Rh | 0.125105000  | 0.271836000  | 1.217920000  |
| H  | 1.107573000  | -0.267772000 | 3.285723000  |
| N  | 0.624186000  | 0.600868000  | 2.978068000  |
| C  | -0.282895000 | -1.145915000 | 5.242131000  |
| C  | -1.546749000 | -0.930330000 | 4.850222000  |
| H  | 0.232053000  | -0.359916000 | 5.799579000  |
| H  | -2.059605000 | -0.006018000 | 5.100267000  |
| H  | -2.103739000 | -1.658369000 | 4.262643000  |
| C  | 0.508957000  | -2.354013000 | 4.986835000  |
| C  | -0.082873000 | -3.587302000 | 4.677067000  |
| C  | 1.905982000  | -2.292199000 | 5.090901000  |
| C  | 0.698333000  | -4.719018000 | 4.481862000  |
| C  | 2.689284000  | -3.423728000 | 4.887029000  |
| C  | 2.086679000  | -4.642541000 | 4.588691000  |
| H  | -1.167994000 | -3.666787000 | 4.634388000  |
| H  | 2.377641000  | -1.343363000 | 5.348077000  |
| H  | 0.221495000  | -5.670454000 | 4.258197000  |
| H  | 3.771405000  | -3.354719000 | 4.971876000  |
| H  | 2.695291000  | -5.531120000 | 4.438459000  |

### Cycle B: Rh-Amine

20

Temperature = 298.150 K

Pressure = 1.00000 Atm

6-31G(d,p)[LANL2DZ]

Electronic Energy = -2834.73739462

Electronic and Zero-Point Energy = -2833.936749

Enthalpy = -2833.881545

Free Energy = -2834.023887

6-311++G(2d,2p)[LANL2TZ(f)]

Electronic Energy = -2835.48701372

|    |              |              |              |
|----|--------------|--------------|--------------|
| Rh | -0.718973000 | -0.961882000 | -0.053749000 |
| C  | 1.876121000  | -1.309603000 | 1.239328000  |
| C  | 2.982349000  | -2.060311000 | 1.979293000  |
| C  | 3.207964000  | -1.371600000 | 3.328073000  |
| H  | 3.490209000  | -0.321858000 | 3.198551000  |
| H  | 4.012198000  | -1.882898000 | 3.871243000  |
| H  | 2.304065000  | -1.414719000 | 3.947938000  |
| C  | 2.596806000  | -3.516110000 | 2.210622000  |
| H  | 1.690763000  | -3.589844000 | 2.821561000  |
| H  | 3.410257000  | -4.026569000 | 2.741769000  |
| H  | 2.414359000  | -4.045798000 | 1.270154000  |
| O  | 0.834759000  | -1.946124000 | 0.913128000  |
| O  | 1.407981000  | 0.475421000  | -1.848931000 |
| C  | 3.861147000  | -3.351238000 | -2.900232000 |
| H  | 3.749779000  | -3.697869000 | -3.927393000 |
| C  | 3.595490000  | -2.014292000 | -2.593479000 |
| C  | 3.113636000  | -1.047244000 | -3.638844000 |
| H  | 3.490411000  | -1.338502000 | -4.629874000 |
| H  | 3.518731000  | -0.048903000 | -3.427411000 |
| C  | 1.573768000  | -0.935129000 | -3.760936000 |
| C  | 0.986115000  | -2.232479000 | -4.302627000 |
| H  | 1.200215000  | -3.082919000 | -3.647285000 |
| H  | 1.417560000  | -2.441352000 | -5.289821000 |
| H  | -0.100685000 | -2.155704000 | -4.413340000 |
| C  | 1.241601000  | 0.213918000  | -4.717075000 |
| H  | 0.157088000  | 0.319182000  | -4.842286000 |
| H  | 1.675294000  | 0.008588000  | -5.703470000 |
| H  | 1.641094000  | 1.167096000  | -4.354445000 |
| C  | 0.989331000  | -0.596882000 | -2.389512000 |
| O  | 0.138992000  | -1.389073000 | -1.892374000 |
| O  | 2.094197000  | -0.078195000 | 1.004846000  |
| C  | 4.288146000  | -1.962364000 | 1.151461000  |
| H  | 4.614292000  | -0.914216000 | 1.148483000  |
| H  | 5.052611000  | -2.536878000 | 1.694286000  |
| C  | 4.170586000  | -2.458488000 | -0.262892000 |
| C  | 4.431475000  | -3.790297000 | -0.596172000 |
| H  | 4.765733000  | -4.480623000 | 0.177989000  |
| C  | 4.281579000  | -4.231537000 | -1.907516000 |
| H  | 4.499082000  | -5.267322000 | -2.158799000 |
| C  | 3.770927000  | -1.584836000 | -1.276194000 |
| H  | 3.583361000  | -0.538400000 | -1.030393000 |
| O  | -2.152025000 | 0.171734000  | -1.052525000 |
| C  | -4.321580000 | 2.103741000  | -1.192482000 |
| H  | -4.670911000 | 1.063112000  | -1.183733000 |
| H  | -5.075553000 | 2.692883000  | -1.734369000 |
| C  | -4.188244000 | 2.601310000  | 0.220071000  |

|    |              |              |              |
|----|--------------|--------------|--------------|
| C  | -4.433445000 | 3.934995000  | 0.557044000  |
| H  | -4.761490000 | 4.631459000  | -0.214361000 |
| C  | -4.277174000 | 4.369897000  | 1.870145000  |
| H  | -4.482780000 | 5.407320000  | 2.124908000  |
| C  | -3.794907000 | 1.721556000  | 1.230291000  |
| H  | -3.617275000 | 0.675559000  | 0.980485000  |
| O  | -0.190348000 | 1.484058000  | 1.840375000  |
| O  | -1.445481000 | -0.390603000 | 1.815721000  |
| C  | -3.867662000 | 3.481580000  | 2.860544000  |
| H  | -3.754330000 | 3.823754000  | 3.889032000  |
| C  | -3.616204000 | 2.142735000  | 2.549404000  |
| C  | -3.149037000 | 1.161550000  | 3.588639000  |
| H  | -3.529066000 | 1.447152000  | 4.580225000  |
| H  | -3.554742000 | 0.166988000  | 3.362184000  |
| C  | -1.610458000 | 1.036729000  | 3.718230000  |
| C  | -1.009972000 | 2.329399000  | 4.256621000  |
| H  | -1.212607000 | 3.180561000  | 3.598686000  |
| H  | -1.441969000 | 2.546137000  | 5.241953000  |
| H  | 0.075712000  | 2.240970000  | 4.371770000  |
| C  | -1.294521000 | -0.111879000 | 4.679734000  |
| H  | -0.211629000 | -0.233814000 | 4.804319000  |
| H  | -1.723400000 | 0.106033000  | 5.665568000  |
| H  | -1.711559000 | -1.058423000 | 4.321487000  |
| C  | -1.033948000 | 0.682298000  | 2.347676000  |
| O  | -0.880240000 | 2.032688000  | -0.954539000 |
| C  | -1.926742000 | 1.396674000  | -1.285288000 |
| C  | -3.018229000 | 2.168381000  | -2.027065000 |
| C  | -3.264707000 | 1.475388000  | -3.369681000 |
| H  | -3.563393000 | 0.431463000  | -3.230817000 |
| H  | -4.064161000 | 1.996594000  | -3.910576000 |
| H  | -2.364662000 | 1.499293000  | -3.996217000 |
| C  | -2.607311000 | 3.615481000  | -2.269975000 |
| H  | -1.699526000 | 3.669657000  | -2.880625000 |
| H  | -3.411693000 | 4.135127000  | -2.806122000 |
| H  | -2.417593000 | 4.150071000  | -1.333653000 |
| Rh | 0.647982000  | 1.026562000  | 0.009565000  |
| H  | 1.947812000  | 3.474530000  | 0.757235000  |
| O  | 3.248314000  | 7.233421000  | -0.459029000 |
| O  | 2.159245000  | 5.569451000  | 0.382643000  |
| H  | 2.964521000  | 2.303614000  | 0.151023000  |
| O  | 2.009386000  | 3.411623000  | -1.205358000 |
| C  | 3.238845000  | 3.867126000  | -1.592212000 |
| C  | 3.731333000  | 5.136493000  | -1.251382000 |
| C  | 3.988556000  | 3.040492000  | -2.422558000 |
| C  | 4.946024000  | 5.580454000  | -1.748231000 |
| C  | 5.216298000  | 3.459498000  | -2.910392000 |
| H  | 3.568196000  | 2.065996000  | -2.665232000 |
| C  | 5.669733000  | 4.726150000  | -2.562258000 |
| H  | 5.318859000  | 6.567695000  | -1.498294000 |
| H  | 5.818447000  | 2.826268000  | -3.553013000 |
| N  | 2.042341000  | 2.740240000  | 0.048330000  |



|   |             |             |              |
|---|-------------|-------------|--------------|
| N | 2.987732000 | 6.046745000 | -0.379918000 |
| N | 6.965704000 | 5.184512000 | -3.076446000 |
| O | 7.588114000 | 4.419878000 | -3.794014000 |
| O | 7.339043000 | 6.300152000 | -2.754954000 |

**TS2**

Lowest Frequency Vibration = -432.9984 cm<sup>\*\*</sup>-1

Temperature = 298.150 K

Pressure = 1.00000 Atm

6-31G(d,p)[LANL2DZ]

Electronic Energy = -3144.11774606

Electronic and Zero-Point Energy = -3143.184828

Enthalpy = -3143.122273

Free Energy = -3143.277309

6-311++G(2d,2p)[LANL2TZ(f)]

Electronic Energy = -3144.95029397

|    |              |              |              |
|----|--------------|--------------|--------------|
| Rh | -0.637406000 | -0.941294000 | 0.072976000  |
| C  | 1.983495000  | -1.129242000 | 1.338597000  |
| C  | 3.138167000  | -1.804096000 | 2.075367000  |
| C  | 3.377552000  | -1.056908000 | 3.390337000  |
| H  | 3.671975000  | -0.015702000 | 3.219387000  |
| H  | 4.182105000  | -1.549679000 | 3.949348000  |
| H  | 2.478116000  | -1.063393000 | 4.018142000  |
| C  | 2.809734000  | -3.262040000 | 2.374472000  |
| H  | 1.923671000  | -3.340786000 | 3.013567000  |
| H  | 3.654364000  | -3.722564000 | 2.901891000  |
| H  | 2.619748000  | -3.834789000 | 1.461454000  |
| O  | 0.979463000  | -1.825128000 | 1.025747000  |
| O  | 1.343935000  | 0.608801000  | -1.747003000 |
| C  | 3.877935000  | -3.180937000 | -2.799308000 |
| H  | 3.738183000  | -3.553049000 | -3.813882000 |
| C  | 3.615176000  | -1.837951000 | -2.518150000 |
| C  | 3.097832000  | -0.901683000 | -3.574184000 |
| H  | 3.450915000  | -1.214502000 | -4.567125000 |
| H  | 3.507444000  | 0.100300000  | -3.397932000 |
| C  | 1.553171000  | -0.806690000 | -3.662927000 |
| C  | 0.978275000  | -2.114696000 | -4.195921000 |
| H  | 1.229349000  | -2.964502000 | -3.553387000 |
| H  | 1.386682000  | -2.306201000 | -5.196216000 |
| H  | -0.112566000 | -2.061548000 | -4.276079000 |
| C  | 1.174971000  | 0.332694000  | -4.613503000 |
| H  | 0.086997000  | 0.389670000  | -4.739735000 |
| H  | 1.618188000  | 0.149962000  | -5.599946000 |
| H  | 1.525792000  | 1.304762000  | -4.251039000 |
| C  | 0.986863000  | -0.489996000 | -2.277991000 |
| O  | 0.203492000  | -1.335467000 | -1.759408000 |
| O  | 2.125142000  | 0.113070000  | 1.088402000  |

|    |              |              |              |
|----|--------------|--------------|--------------|
| C  | 4.415478000  | -1.696532000 | 1.203631000  |
| H  | 4.726136000  | -0.643533000 | 1.172353000  |
| H  | 5.207488000  | -2.244299000 | 1.734040000  |
| C  | 4.263287000  | -2.220697000 | -0.196941000 |
| C  | 4.521188000  | -3.559289000 | -0.504940000 |
| H  | 4.883790000  | -4.227973000 | 0.275271000  |
| C  | 4.334140000  | -4.034239000 | -1.799184000 |
| H  | 4.550503000  | -5.074612000 | -2.031292000 |
| C  | 3.829753000  | -1.372425000 | -1.218567000 |
| H  | 3.648078000  | -0.317936000 | -0.997317000 |
| O  | -2.152450000 | 0.096079000  | -0.907252000 |
| C  | -4.439271000 | 1.919194000  | -1.008085000 |
| H  | -4.745366000 | 0.865024000  | -0.992853000 |
| H  | -5.227016000 | 2.476372000  | -1.535335000 |
| C  | -4.296614000 | 2.420837000  | 0.401866000  |
| C  | -4.560407000 | 3.749997000  | 0.742792000  |
| H  | -4.915333000 | 4.440038000  | -0.022339000 |
| C  | -4.389822000 | 4.188061000  | 2.053077000  |
| H  | -4.610209000 | 5.221562000  | 2.311114000  |
| C  | -3.871933000 | 1.548686000  | 1.405715000  |
| H  | -3.682527000 | 0.505062000  | 1.153518000  |
| O  | -0.297790000 | 1.492757000  | 1.972036000  |
| O  | -1.400802000 | -0.471142000 | 1.944550000  |
| C  | -3.948326000 | 3.307734000  | 3.037004000  |
| H  | -3.825604000 | 3.652178000  | 4.063588000  |
| C  | -3.679642000 | 1.973349000  | 2.721732000  |
| C  | -3.179786000 | 0.998638000  | 3.751291000  |
| H  | -3.561539000 | 1.263973000  | 4.747680000  |
| H  | -3.558718000 | -0.005032000 | 3.518278000  |
| C  | -1.637069000 | 0.914436000  | 3.872375000  |
| C  | -1.067618000 | 2.206018000  | 4.445882000  |
| H  | -1.279703000 | 3.070328000  | 3.807723000  |
| H  | -1.509569000 | 2.390066000  | 5.433128000  |
| H  | 0.018991000  | 2.130757000  | 4.570975000  |
| C  | -1.284078000 | -0.252174000 | 4.798440000  |
| H  | -0.197586000 | -0.351526000 | 4.911133000  |
| H  | -1.709854000 | -0.070581000 | 5.792813000  |
| H  | -1.681545000 | -1.198486000 | 4.418661000  |
| C  | -1.064057000 | 0.620095000  | 2.487307000  |
| O  | -1.017283000 | 2.042374000  | -0.796289000 |
| C  | -2.016775000 | 1.334024000  | -1.133017000 |
| C  | -3.156128000 | 2.037295000  | -1.868786000 |
| C  | -3.389418000 | 1.312128000  | -3.196454000 |
| H  | -3.633832000 | 0.257054000  | -3.038385000 |
| H  | -4.222563000 | 1.785671000  | -3.729997000 |
| H  | -2.502152000 | 1.371537000  | -3.838527000 |
| C  | -2.821290000 | 3.499111000  | -2.140135000 |
| H  | -1.925121000 | 3.588198000  | -2.763994000 |
| H  | -3.657600000 | 3.967796000  | -2.673998000 |
| H  | -2.646455000 | 4.059041000  | -1.216032000 |
| Rh | 0.585139000  | 1.146321000  | 0.131841000  |

|   |             |             |              |
|---|-------------|-------------|--------------|
| H | 1.416771000 | 3.904033000 | 0.390025000  |
| O | 3.895685000 | 7.059330000 | -0.587505000 |
| O | 2.322725000 | 5.744463000 | 0.077918000  |
| C | 2.283399000 | 2.947307000 | 2.529284000  |
| C | 3.292476000 | 3.847808000 | 2.360983000  |
| H | 1.339688000 | 3.257166000 | 2.967918000  |
| H | 2.426261000 | 1.876255000 | 2.406207000  |
| H | 3.111727000 | 4.885279000 | 2.647670000  |
| C | 4.574120000 | 3.588880000 | 1.745185000  |
| C | 4.881909000 | 2.360060000 | 1.121677000  |
| C | 5.527243000 | 4.623674000 | 1.700081000  |
| C | 6.101825000 | 2.179787000 | 0.489118000  |
| C | 6.752136000 | 4.433085000 | 1.078902000  |
| C | 7.039721000 | 3.213474000 | 0.466378000  |
| H | 4.156420000 | 1.544474000 | 1.127875000  |
| H | 5.289828000 | 5.580165000 | 2.163495000  |
| H | 6.321035000 | 1.233617000 | -0.001655000 |
| H | 7.480381000 | 5.239618000 | 1.052101000  |
| H | 7.996883000 | 3.067009000 | -0.029224000 |
| H | 2.689056000 | 2.872273000 | 0.163061000  |
| O | 1.800064000 | 3.692464000 | -1.668909000 |
| C | 3.053161000 | 3.830369000 | -1.901010000 |
| C | 3.860266000 | 4.928378000 | -1.442677000 |
| C | 3.743234000 | 2.834643000 | -2.652312000 |
| C | 5.200773000 | 5.044946000 | -1.776938000 |
| C | 5.077349000 | 2.921400000 | -2.956520000 |
| H | 3.137757000 | 1.984833000 | -2.952624000 |
| C | 5.800360000 | 4.036210000 | -2.508375000 |
| H | 5.777482000 | 5.898515000 | -1.437447000 |
| H | 5.584794000 | 2.141909000 | -3.517152000 |
| N | 1.675065000 | 2.927493000 | 0.239714000  |
| N | 3.317391000 | 5.982012000 | -0.604024000 |
| N | 7.221220000 | 4.127955000 | -2.787840000 |
| O | 7.733785000 | 3.225472000 | -3.437086000 |
| O | 7.836140000 | 5.092625000 | -2.350279000 |

## 21

Temperature = 298.150 Kq

Pressure = 1.00000 Atm

6-31G(d,p)[LANL2DZ]

Electronic Energy = -3144.20278694

Electronic and Zero-Point Energy = -3143.265269

Enthalpy = -3143.202737

Free Energy = -3143.358076

6-311++G(2d,2p)[LANL2TZ(f)]

Electronic Energy = -3145.03226081

|    |              |              |              |
|----|--------------|--------------|--------------|
| Rh | -0.645157000 | -0.797854000 | 0.118212000  |
| C  | 2.134437000  | -0.071546000 | 0.646079000  |
| C  | 3.575508000  | -0.293628000 | 1.106893000  |
| C  | 3.878135000  | 0.673421000  | 2.254480000  |
| H  | 3.733899000  | 1.718287000  | 1.958504000  |
| H  | 4.920053000  | 0.549051000  | 2.574444000  |
| H  | 3.234754000  | 0.472155000  | 3.119625000  |
| C  | 3.781699000  | -1.724228000 | 1.590335000  |
| H  | 3.128292000  | -1.949657000 | 2.439930000  |
| H  | 4.822256000  | -1.851150000 | 1.915234000  |
| H  | 3.576065000  | -2.455195000 | 0.802052000  |
| O  | 1.337320000  | -1.050581000 | 0.687928000  |
| O  | 0.286844000  | 0.862899000  | -2.354099000 |
| C  | 3.633875000  | -2.162763000 | -3.675047000 |
| H  | 3.410964000  | -2.706095000 | -4.593265000 |
| C  | 3.001045000  | -0.942272000 | -3.425615000 |
| C  | 1.988062000  | -0.357409000 | -4.369855000 |
| H  | 2.202666000  | -0.668582000 | -5.402759000 |
| H  | 2.058329000  | 0.738254000  | -4.333247000 |
| C  | 0.520943000  | -0.760061000 | -4.076498000 |
| C  | 0.315942000  | -2.252433000 | -4.304685000 |
| H  | 0.954559000  | -2.857296000 | -3.653077000 |
| H  | 0.558012000  | -2.496551000 | -5.347059000 |
| H  | -0.724928000 | -2.539232000 | -4.119337000 |
| C  | -0.396845000 | 0.029693000  | -5.012803000 |
| H  | -1.449995000 | -0.220555000 | -4.834844000 |
| H  | -0.163809000 | -0.221891000 | -6.054851000 |
| H  | -0.269382000 | 1.108668000  | -4.879859000 |
| C  | 0.188891000  | -0.370409000 | -2.635919000 |
| O  | -0.150832000 | -1.288444000 | -1.833232000 |
| O  | 1.847108000  | 1.100731000  | 0.243517000  |
| C  | 4.526180000  | 0.019882000  | -0.075232000 |
| H  | 4.468560000  | 1.095867000  | -0.295667000 |
| H  | 5.548851000  | -0.182200000 | 0.275296000  |
| C  | 4.239221000  | -0.753681000 | -1.332069000 |
| C  | 4.860438000  | -1.975427000 | -1.602912000 |
| H  | 5.594368000  | -2.372466000 | -0.901758000 |
| C  | 4.559231000  | -2.673891000 | -2.768912000 |
| H  | 5.056584000  | -3.618660000 | -2.977711000 |
| C  | 3.319347000  | -0.249888000 | -2.255036000 |
| H  | 2.855172000  | 0.722079000  | -2.075799000 |
| O  | -2.578602000 | -0.359245000 | -0.537731000 |
| C  | -5.250338000 | 0.762978000  | -0.213686000 |
| H  | -5.205545000 | -0.311049000 | 0.008763000  |
| H  | -6.269818000 | 0.977527000  | -0.565720000 |
| C  | -4.954341000 | 1.547039000  | 1.034636000  |
| C  | -5.548639000 | 2.787171000  | 1.282679000  |
| H  | -6.271195000 | 3.187575000  | 0.571839000  |
| C  | -5.235786000 | 3.500160000  | 2.436492000  |
| H  | -5.713237000 | 4.459003000  | 2.626531000  |
| C  | -4.053228000 | 1.041683000  | 1.973758000  |

|    |              |              |              |
|----|--------------|--------------|--------------|
| H  | -3.595774000 | 0.068146000  | 1.797206000  |
| O  | -0.566074000 | 2.008065000  | 1.530555000  |
| O  | -1.059562000 | -0.127906000 | 2.059266000  |
| C  | -4.322563000 | 2.987232000  | 3.353568000  |
| H  | -4.086951000 | 3.544017000  | 4.260383000  |
| C  | -3.715683000 | 1.748610000  | 3.129633000  |
| C  | -2.710594000 | 1.172640000  | 4.088435000  |
| H  | -2.911992000 | 1.526436000  | 5.109989000  |
| H  | -2.803597000 | 0.078810000  | 4.102538000  |
| C  | -1.235814000 | 1.525931000  | 3.773865000  |
| C  | -0.985399000 | 3.016485000  | 3.970364000  |
| H  | -1.616221000 | 3.627363000  | 3.316038000  |
| H  | -1.204183000 | 3.287526000  | 5.011121000  |
| H  | 0.060709000  | 3.269607000  | 3.762975000  |
| C  | -0.331672000 | 0.727835000  | 4.716054000  |
| H  | 0.725659000  | 0.952026000  | 4.529258000  |
| H  | -0.553755000 | 0.997785000  | 5.755835000  |
| H  | -0.484029000 | -0.349608000 | 4.597213000  |
| C  | -0.928050000 | 1.099032000  | 2.339051000  |
| O  | -2.058963000 | 1.793059000  | -0.977114000 |
| C  | -2.860392000 | 0.809081000  | -0.935942000 |
| C  | -4.296856000 | 1.049903000  | -1.400456000 |
| C  | -4.609422000 | 0.060766000  | -2.526059000 |
| H  | -4.485581000 | -0.974497000 | -2.192911000 |
| H  | -5.645864000 | 0.197706000  | -2.858314000 |
| H  | -3.954995000 | 0.228192000  | -3.390425000 |
| C  | -4.485997000 | 2.473668000  | -1.909169000 |
| H  | -3.828751000 | 2.677399000  | -2.761537000 |
| H  | -5.524460000 | 2.605546000  | -2.238956000 |
| H  | -4.275159000 | 3.217422000  | -1.134129000 |
| Rh | -0.095053000 | 1.498744000  | -0.412499000 |
| H  | 1.199880000  | 3.526787000  | -1.610966000 |
| H  | -0.279357000 | 4.149749000  | -1.169896000 |
| O  | 2.716154000  | 3.069056000  | -2.619749000 |
| C  | 3.819696000  | 3.625440000  | -2.770413000 |
| C  | 4.048768000  | 5.070060000  | -2.853644000 |
| C  | 5.032651000  | 2.830193000  | -2.885098000 |
| C  | 6.276001000  | 3.370551000  | -2.976223000 |
| H  | 4.887408000  | 1.751120000  | -2.868072000 |
| H  | 7.163294000  | 2.747076000  | -3.028356000 |
| N  | 0.505007000  | 3.584819000  | -0.849412000 |
| N  | 2.971654000  | 6.004545000  | -2.813732000 |
| O  | 3.190707000  | 7.189377000  | -3.068871000 |
| O  | 1.845463000  | 5.609033000  | -2.481138000 |
| C  | 1.128146000  | 4.156300000  | 0.352369000  |
| C  | 1.958400000  | 5.357378000  | 0.078646000  |
| H  | 0.335915000  | 4.441322000  | 1.056757000  |
| H  | 1.712636000  | 3.371345000  | 0.840323000  |
| H  | 1.436385000  | 6.290932000  | -0.135306000 |
| C  | 3.345117000  | 5.398911000  | 0.174869000  |
| C  | 4.123813000  | 4.211412000  | 0.309045000  |

|   |             |             |              |
|---|-------------|-------------|--------------|
| C | 4.009786000 | 6.657435000 | 0.091383000  |
| C | 5.495512000 | 4.292181000 | 0.398691000  |
| C | 5.382303000 | 6.724056000 | 0.181966000  |
| C | 6.121349000 | 5.543213000 | 0.332209000  |
| H | 3.628674000 | 3.240607000 | 0.300788000  |
| H | 3.414154000 | 7.559024000 | -0.034789000 |
| H | 6.091088000 | 3.388153000 | 0.493903000  |
| H | 5.892978000 | 7.680166000 | 0.124711000  |
| H | 7.205805000 | 5.599336000 | 0.393614000  |
| C | 5.327053000 | 5.611540000 | -2.964070000 |
| C | 6.424256000 | 4.780778000 | -2.985238000 |
| H | 5.453959000 | 6.688289000 | -2.998356000 |
| N | 7.739832000 | 5.362903000 | -3.012527000 |
| O | 8.701767000 | 4.607264000 | -3.123678000 |
| O | 7.844475000 | 6.583120000 | -2.911760000 |

### TS3

Lowest Frequency Vibration = -446.5202 cm<sup>\*\*</sup>-1

Temperature = 298.150 Kq

Pressure = 1.00000 Atm

#### 6-31G(d,p)[LANL2DZ]

Electronic Energy = -3144.19048413

Electronic and Zero-Point Energy = -3143.255792

Enthalpy = -3143.193402

Free Energy = -3143.350210

#### 6-311++G(2d,2p)[LANL2TZ(f)]

Electronic Energy = -3145.02145549

|    |              |              |              |
|----|--------------|--------------|--------------|
| Rh | -0.632859000 | -0.756087000 | -0.002437000 |
| C  | 2.070921000  | -0.476998000 | 1.026920000  |
| C  | 3.398151000  | -0.934981000 | 1.627006000  |
| C  | 3.618109000  | -0.187397000 | 2.944652000  |
| H  | 3.633083000  | 0.897008000  | 2.791649000  |
| H  | 4.578314000  | -0.488782000 | 3.380901000  |
| H  | 2.830680000  | -0.425218000 | 3.669999000  |
| C  | 3.396021000  | -2.436279000 | 1.886518000  |
| H  | 2.606744000  | -2.711934000 | 2.594471000  |
| H  | 4.360995000  | -2.730753000 | 2.318184000  |
| H  | 3.241479000  | -3.009840000 | 0.967246000  |
| O  | 1.198473000  | -1.354372000 | 0.755629000  |
| O  | 0.823790000  | 1.182103000  | -1.943928000 |
| C  | 3.953278000  | -1.980082000 | -3.369853000 |
| H  | 3.808910000  | -2.332798000 | -4.391067000 |
| C  | 3.443654000  | -0.735204000 | -2.992036000 |
| C  | 2.661954000  | 0.127182000  | -3.943323000 |
| H  | 2.992758000  | -0.045173000 | -4.977974000 |
| H  | 2.851824000  | 1.185127000  | -3.713723000 |
| C  | 1.129307000  | -0.100576000 | -3.921792000 |

|   |              |              |              |
|---|--------------|--------------|--------------|
| C | 0.780596000  | -1.474340000 | -4.480806000 |
| H | 1.237247000  | -2.280257000 | -3.897358000 |
| H | 1.143736000  | -1.548301000 | -5.513725000 |
| H | -0.303307000 | -1.633384000 | -4.487216000 |
| C | 0.470455000  | 0.986486000  | -4.774647000 |
| H | -0.620708000 | 0.875315000  | -4.783729000 |
| H | 0.825178000  | 0.905498000  | -5.809520000 |
| H | 0.715860000  | 1.986087000  | -4.400255000 |
| C | 0.635908000  | 0.050984000  | -2.484106000 |
| O | 0.085410000  | -0.948965000 | -1.931021000 |
| O | 1.944235000  | 0.771073000  | 0.833267000  |
| C | 4.534572000  | -0.547772000 | 0.646762000  |
| H | 4.606910000  | 0.548656000  | 0.624396000  |
| H | 5.470955000  | -0.926836000 | 1.081561000  |
| C | 4.358792000  | -1.062705000 | -0.754943000 |
| C | 4.860633000  | -2.304100000 | -1.155153000 |
| H | 5.424939000  | -2.910225000 | -0.446476000 |
| C | 4.659718000  | -2.757620000 | -2.455970000 |
| H | 5.064536000  | -3.719788000 | -2.762481000 |
| C | 3.662740000  | -0.289549000 | -1.686450000 |
| H | 3.292019000  | 0.694554000  | -1.393001000 |
| O | -2.400300000 | 0.011803000  | -0.801777000 |
| C | -4.962511000 | 1.413177000  | -0.627403000 |
| H | -5.081005000 | 0.322260000  | -0.594912000 |
| H | -5.886815000 | 1.825408000  | -1.057299000 |
| C | -4.756179000 | 1.935521000  | 0.767077000  |
| C | -5.205428000 | 3.200577000  | 1.155107000  |
| H | -5.749730000 | 3.819052000  | 0.441780000  |
| C | -4.978592000 | 3.662412000  | 2.448612000  |
| H | -5.343994000 | 4.643284000  | 2.744809000  |
| C | -4.087752000 | 1.149934000  | 1.707789000  |
| H | -3.747615000 | 0.154760000  | 1.420327000  |
| O | -0.516663000 | 1.708200000  | 1.924967000  |
| O | -1.265695000 | -0.417690000 | 1.957266000  |
| C | -4.297148000 | 2.870336000  | 3.368540000  |
| H | -4.131822000 | 3.230508000  | 4.383741000  |
| C | -3.838790000 | 1.601307000  | 3.005306000  |
| C | -3.081310000 | 0.725662000  | 3.964252000  |
| H | -3.400487000 | 0.924127000  | 4.997589000  |
| H | -3.308685000 | -0.327680000 | 3.753996000  |
| C | -1.542171000 | 0.901799000  | 3.929904000  |
| C | -1.143369000 | 2.273362000  | 4.462330000  |
| H | -1.580711000 | 3.085428000  | 3.872064000  |
| H | -1.489447000 | 2.375275000  | 5.498663000  |
| H | -0.054183000 | 2.396395000  | 4.451613000  |
| C | -0.908904000 | -0.188083000 | 4.797527000  |
| H | 0.183917000  | -0.097780000 | 4.808551000  |
| H | -1.264761000 | -0.087335000 | 5.830139000  |
| H | -1.170694000 | -1.187644000 | 4.436634000  |
| C | -1.067634000 | 0.714696000  | 2.490753000  |
| O | -1.611701000 | 2.123644000  | -0.771945000 |

|    |              |              |              |
|----|--------------|--------------|--------------|
| C  | -2.503994000 | 1.255912000  | -1.020453000 |
| C  | -3.820549000 | 1.744691000  | -1.621164000 |
| C  | -4.073415000 | 0.981606000  | -2.923615000 |
| H  | -4.111392000 | -0.098821000 | -2.752855000 |
| H  | -5.031287000 | 1.298957000  | -3.353571000 |
| H  | -3.289255000 | 1.189917000  | -3.661437000 |
| C  | -3.774506000 | 3.240467000  | -1.909142000 |
| H  | -2.978945000 | 3.479390000  | -2.623535000 |
| H  | -4.731245000 | 3.554074000  | -2.345568000 |
| H  | -3.602060000 | 3.828130000  | -1.001950000 |
| Rh | 0.195671000  | 1.495482000  | 0.001865000  |
| H  | 1.711096000  | 3.556733000  | -0.724457000 |
| H  | 0.103774000  | 4.157769000  | -0.291090000 |
| O  | 3.198647000  | 3.010294000  | -1.275782000 |
| C  | 3.897189000  | 3.359978000  | -2.255789000 |
| C  | 3.522754000  | 4.318548000  | -3.283962000 |
| C  | 5.233507000  | 2.824493000  | -2.406131000 |
| C  | 6.092887000  | 3.215060000  | -3.387136000 |
| H  | 5.529033000  | 2.086474000  | -1.662982000 |
| H  | 7.093420000  | 2.800274000  | -3.461160000 |
| N  | 0.982074000  | 3.743810000  | 0.012558000  |
| N  | 2.222189000  | 4.930037000  | -3.315268000 |
| O  | 2.043789000  | 5.903672000  | -4.045423000 |
| O  | 1.321387000  | 4.461397000  | -2.616989000 |
| C  | 1.446994000  | 4.016834000  | 1.382689000  |
| C  | 1.773681000  | 5.291309000  | 0.772213000  |
| H  | 0.637118000  | 3.981945000  | 2.110128000  |
| H  | 2.265291000  | 3.342964000  | 1.640670000  |
| H  | 0.952369000  | 6.003059000  | 0.694673000  |
| C  | 3.035548000  | 5.692297000  | 0.227038000  |
| C  | 4.238058000  | 5.040245000  | 0.557021000  |
| C  | 3.054195000  | 6.773749000  | -0.674932000 |
| C  | 5.428779000  | 5.466217000  | -0.005744000 |
| C  | 4.245081000  | 7.179123000  | -1.253004000 |
| C  | 5.430291000  | 6.523880000  | -0.917026000 |
| H  | 4.235548000  | 4.205496000  | 1.253225000  |
| H  | 2.119341000  | 7.270826000  | -0.929025000 |
| H  | 6.359517000  | 4.968874000  | 0.251699000  |
| H  | 4.255717000  | 8.000594000  | -1.963661000 |
| H  | 6.366993000  | 6.841617000  | -1.368375000 |
| C  | 4.411784000  | 4.729154000  | -4.270343000 |
| C  | 5.679904000  | 4.187742000  | -4.326446000 |
| H  | 4.100603000  | 5.469654000  | -4.998618000 |
| N  | 6.581082000  | 4.613276000  | -5.357926000 |
| O  | 7.704756000  | 4.113300000  | -5.387220000 |
| O  | 6.199901000  | 5.457644000  | -6.167023000 |

**Cycle C: Rh-Alkene**



Temperature = 298.150 K

Pressure = 1.00000 Atm

6-31G(d,p)[LANL2DZ]

Electronic Energy = -2372.80767740

Electronic and Zero-Point Energy = -2372.001657

Enthalpy = -2371.951761

Free Energy = -2372.079183

6-311++G(2d,2p)[LANL2TZ(f)]

Electronic Energy = -2373.41025444

|    |              |              |              |
|----|--------------|--------------|--------------|
| Rh | -0.699766000 | -1.080902000 | 0.202007000  |
| C  | 1.942535000  | -1.260802000 | 1.388611000  |
| C  | 3.098842000  | -1.938431000 | 2.123978000  |
| C  | 3.366977000  | -1.161246000 | 3.415172000  |
| H  | 3.612049000  | -0.114813000 | 3.208181000  |
| H  | 4.210154000  | -1.616522000 | 3.949049000  |
| H  | 2.494371000  | -1.189215000 | 4.079456000  |
| C  | 2.767955000  | -3.386626000 | 2.464058000  |
| H  | 1.885254000  | -3.447484000 | 3.110033000  |
| H  | 3.614917000  | -3.834743000 | 2.999059000  |
| H  | 2.573220000  | -3.984762000 | 1.568205000  |
| O  | 0.926286000  | -1.971606000 | 1.117811000  |
| O  | 1.261519000  | 0.386912000  | -1.763254000 |
| C  | 3.778749000  | -3.441679000 | -2.733495000 |
| H  | 3.632264000  | -3.834267000 | -3.739510000 |
| C  | 3.501918000  | -2.097102000 | -2.472467000 |
| C  | 2.966318000  | -1.177308000 | -3.534138000 |
| H  | 3.321446000  | -1.492031000 | -4.526119000 |
| H  | 3.346569000  | -0.161722000 | -3.363551000 |
| C  | 1.420938000  | -1.105561000 | -3.615165000 |
| C  | 0.842192000  | -2.432344000 | -4.090666000 |
| H  | 1.070663000  | -3.251967000 | -3.400724000 |
| H  | 1.262265000  | -2.680200000 | -5.073737000 |
| H  | -0.247791000 | -2.368817000 | -4.189983000 |
| C  | 1.038241000  | -0.001430000 | -4.603899000 |
| H  | -0.051258000 | 0.082972000  | -4.697345000 |
| H  | 1.442130000  | -0.241471000 | -5.595150000 |
| H  | 1.436861000  | 0.969391000  | -4.293044000 |
| C  | 0.881133000  | -0.724590000 | -2.236699000 |
| O  | 0.101847000  | -1.543121000 | -1.662933000 |
| O  | 2.087556000  | -0.036498000 | 1.098483000  |
| C  | 4.361228000  | -1.862528000 | 1.229060000  |
| H  | 4.666337000  | -0.810471000 | 1.156515000  |
| H  | 5.161949000  | -2.394835000 | 1.762631000  |
| C  | 4.185765000  | -2.430395000 | -0.152107000 |
| C  | 4.456666000  | -3.771024000 | -0.439084000 |
| H  | 4.839493000  | -4.421272000 | 0.347278000  |
| C  | 4.256707000  | -4.270981000 | -1.722759000 |
| H  | 4.482445000  | -5.312967000 | -1.938944000 |
| C  | 3.723486000  | -1.610270000 | -1.183070000 |

|    |              |              |              |
|----|--------------|--------------|--------------|
| H  | 3.524428000  | -0.559090000 | -0.974067000 |
| O  | -2.232135000 | -0.068219000 | -0.750517000 |
| C  | -4.544275000 | 1.597199000  | -0.940031000 |
| H  | -4.764079000 | 0.521993000  | -0.899606000 |
| H  | -5.369695000 | 2.078013000  | -1.484805000 |
| C  | -4.449937000 | 2.152458000  | 0.454961000  |
| C  | -4.864349000 | 3.453185000  | 0.754009000  |
| H  | -5.304216000 | 4.068987000  | -0.030297000 |
| C  | -4.729689000 | 3.957411000  | 2.044209000  |
| H  | -5.067101000 | 4.966869000  | 2.269125000  |
| C  | -3.911662000 | 1.373463000  | 1.482188000  |
| H  | -3.605098000 | 0.350005000  | 1.264346000  |
| O  | -0.223336000 | 1.528923000  | 1.929354000  |
| O  | -1.334895000 | -0.424530000 | 2.084766000  |
| C  | -4.167800000 | 3.174801000  | 3.048368000  |
| H  | -4.063703000 | 3.572420000  | 4.057724000  |
| C  | -3.744738000 | 1.870887000  | 2.776371000  |
| C  | -3.099744000 | 1.017147000  | 3.833381000  |
| H  | -3.468743000 | 1.303621000  | 4.828879000  |
| H  | -3.373834000 | -0.034526000 | 3.677443000  |
| C  | -1.554535000 | 1.111017000  | 3.885182000  |
| C  | -1.109819000 | 2.514016000  | 4.278940000  |
| H  | -1.443721000 | 3.266626000  | 3.557358000  |
| H  | -1.532893000 | 2.766413000  | 5.259647000  |
| H  | -0.018788000 | 2.574495000  | 4.351768000  |
| C  | -1.038008000 | 0.103969000  | 4.917076000  |
| H  | 0.056745000  | 0.133593000  | 4.980474000  |
| H  | -1.438383000 | 0.354211000  | 5.907176000  |
| H  | -1.344070000 | -0.917106000 | 4.667252000  |
| C  | -0.989180000 | 0.715904000  | 2.521595000  |
| O  | -1.058554000 | 1.856207000  | -0.848906000 |
| C  | -2.086432000 | 1.152383000  | -1.069367000 |
| C  | -3.267250000 | 1.794164000  | -1.793928000 |
| C  | -3.445026000 | 1.056176000  | -3.124796000 |
| H  | -3.620635000 | -0.014235000 | -2.966875000 |
| H  | -4.302919000 | 1.474707000  | -3.665815000 |
| H  | -2.557617000 | 1.176582000  | -3.758739000 |
| C  | -3.014828000 | 3.272685000  | -2.059952000 |
| H  | -2.131571000 | 3.412999000  | -2.691982000 |
| H  | -3.880563000 | 3.700063000  | -2.581848000 |
| H  | -2.861048000 | 3.835361000  | -1.133291000 |
| Rh | 0.567639000  | 0.987417000  | 0.097164000  |
| C  | -1.869367000 | -3.247151000 | -0.343291000 |
| H  | -0.977271000 | -3.792696000 | -0.657456000 |
| C  | -1.987111000 | -2.922142000 | 0.974815000  |
| H  | -1.256689000 | -3.274164000 | 1.697863000  |
| H  | -2.878962000 | -2.446089000 | 1.378928000  |
| C  | -2.865456000 | -3.032220000 | -1.390886000 |
| C  | -2.560821000 | -3.442254000 | -2.694466000 |
| C  | -4.117524000 | -2.449890000 | -1.144815000 |
| C  | -3.476033000 | -3.277896000 | -3.727825000 |

|   |              |              |              |
|---|--------------|--------------|--------------|
| H | -1.591820000 | -3.899980000 | -2.889713000 |
| C | -5.035703000 | -2.294684000 | -2.173417000 |
| H | -4.374063000 | -2.111833000 | -0.142276000 |
| C | -4.718717000 | -2.706718000 | -3.468608000 |
| H | -3.221110000 | -3.603150000 | -4.733783000 |
| H | -6.004729000 | -1.845255000 | -1.967174000 |
| H | -5.441146000 | -2.582111000 | -4.271664000 |

#### TS4

Lowest Frequency Vibration = -367.8429 cm<sup>\*\*</sup>-1

Temperature = 298.150 K

Pressure = 1.00000 Atm

#### 6-31G(d,p)[LANL2DZ]

Electronic Energy = -3144.11767411

Electronic and Zero-Point Energy = -3143.182064

Enthalpy = -3143.119819

Free Energy = -3143.277519

#### 6-311++G(2d,2p)[LANL2TZ(f)]

Electronic Energy = -3144.94737130

|    |              |              |              |
|----|--------------|--------------|--------------|
| Rh | -0.473235000 | -1.176742000 | 0.007509000  |
| C  | 2.202266000  | -1.152054000 | 1.134468000  |
| C  | 3.450415000  | -1.755827000 | 1.783416000  |
| C  | 3.674859000  | -1.063157000 | 3.129576000  |
| H  | 3.789398000  | 0.018447000  | 3.007026000  |
| H  | 4.583421000  | -1.457795000 | 3.601235000  |
| H  | 2.835506000  | -1.248351000 | 3.811401000  |
| C  | 3.293881000  | -3.255018000 | 2.007320000  |
| H  | 2.442215000  | -3.467636000 | 2.663210000  |
| H  | 4.200666000  | -3.647674000 | 2.485359000  |
| H  | 3.140186000  | -3.796026000 | 1.068148000  |
| O  | 1.260522000  | -1.950000000 | 0.837089000  |
| O  | 1.249774000  | 0.637995000  | -1.878629000 |
| C  | 4.169405000  | -2.799265000 | -3.191798000 |
| H  | 4.043822000  | -3.129661000 | -4.222805000 |
| C  | 3.736513000  | -1.523367000 | -2.821241000 |
| C  | 3.064449000  | -0.599101000 | -3.798345000 |
| H  | 3.421618000  | -0.799912000 | -4.819001000 |
| H  | 3.332368000  | 0.438925000  | -3.561787000 |
| C  | 1.519305000  | -0.699483000 | -3.833735000 |
| C  | 1.079780000  | -2.048649000 | -4.389278000 |
| H  | 1.433261000  | -2.881811000 | -3.772337000 |
| H  | 1.482332000  | -2.173930000 | -5.402787000 |
| H  | -0.013592000 | -2.111452000 | -4.443818000 |
| C  | 0.981779000  | 0.416866000  | -4.732088000 |
| H  | -0.113059000 | 0.380928000  | -4.790676000 |
| H  | 1.376057000  | 0.294983000  | -5.748672000 |

|   |              |              |              |
|---|--------------|--------------|--------------|
| H | 1.276828000  | 1.403571000  | -4.361419000 |
| C | 0.985179000  | -0.476944000 | -2.416563000 |
| O | 0.327705000  | -1.424490000 | -1.889846000 |
| O | 2.210364000  | 0.097959000  | 0.940634000  |
| C | 4.668118000  | -1.465575000 | 0.871305000  |
| H | 4.846788000  | -0.382479000 | 0.875899000  |
| H | 5.541566000  | -1.939134000 | 1.343056000  |
| C | 4.520379000  | -1.943336000 | -0.546766000 |
| C | 4.946609000  | -3.213791000 | -0.943205000 |
| H | 5.428547000  | -3.868544000 | -0.217288000 |
| C | 4.773680000  | -3.636695000 | -2.258204000 |
| H | 5.119792000  | -4.623076000 | -2.559637000 |
| C | 3.930969000  | -1.112052000 | -1.501087000 |
| H | 3.605966000  | -0.114520000 | -1.205257000 |
| O | -2.128549000 | -0.252024000 | -0.847424000 |
| C | -4.622335000 | 1.139540000  | -0.829833000 |
| H | -4.708072000 | 0.045704000  | -0.878870000 |
| H | -5.515866000 | 1.560557000  | -1.313895000 |
| C | -4.555366000 | 1.581102000  | 0.606057000  |
| C | -5.105885000 | 2.795485000  | 1.025022000  |
| H | -5.631438000 | 3.422078000  | 0.304486000  |
| C | -4.996989000 | 3.199245000  | 2.352506000  |
| H | -5.439738000 | 4.140768000  | 2.670548000  |
| C | -3.908178000 | 0.782973000  | 1.552239000  |
| H | -3.489962000 | -0.174113000 | 1.239057000  |
| O | -0.250488000 | 1.323849000  | 1.949829000  |
| O | -1.149688000 | -0.746219000 | 1.942778000  |
| C | -4.326593000 | 2.401904000  | 3.275502000  |
| H | -4.242787000 | 2.720301000  | 4.314496000  |
| C | -3.767014000 | 1.182985000  | 2.882910000  |
| C | -3.003216000 | 0.320138000  | 3.849142000  |
| H | -3.374877000 | 0.476141000  | 4.872510000  |
| H | -3.163869000 | -0.738543000 | 3.604552000  |
| C | -1.476985000 | 0.581237000  | 3.879768000  |
| C | -1.178153000 | 1.980353000  | 4.402910000  |
| H | -1.611482000 | 2.756237000  | 3.763354000  |
| H | -1.598607000 | 2.090610000  | 5.410827000  |
| H | -0.098535000 | 2.154924000  | 4.461683000  |
| C | -0.825709000 | -0.457345000 | 4.797826000  |
| H | 0.260921000  | -0.313308000 | 4.844344000  |
| H | -1.222196000 | -0.352880000 | 5.815448000  |
| H | -1.026117000 | -1.476714000 | 4.449935000  |
| C | -0.909678000 | 0.381931000  | 2.472726000  |
| O | -1.188667000 | 1.801921000  | -0.788233000 |
| C | -2.131018000 | 1.000007000  | -1.051349000 |
| C | -3.404330000 | 1.559300000  | -1.688869000 |
| C | -3.548217000 | 0.923422000  | -3.075079000 |
| H | -3.619243000 | -0.168483000 | -3.006335000 |
| H | -4.456103000 | 1.301567000  | -3.561993000 |
| H | -2.694075000 | 1.180664000  | -3.714188000 |
| C | -3.334091000 | 3.074575000  | -1.828306000 |

|    |              |               |              |
|----|--------------|---------------|--------------|
| H  | -2.495991000 | 3.371294000   | -2.467880000 |
| H  | -4.261481000 | 3.442071000   | -2.286535000 |
| H  | -3.210966000 | 3.569704000   | -0.859413000 |
| Rh | 0.560746000  | 1.051408000   | 0.052074000  |
| C  | -1.323181000 | -3.263326000  | -0.302029000 |
| H  | -0.412653000 | -3.748884000  | -0.662950000 |
| C  | -1.575543000 | -3.385221000  | 1.079475000  |
| H  | -0.725681000 | -3.501399000  | 1.749536000  |
| H  | -2.418324000 | -2.858794000  | 1.530112000  |
| C  | -2.403761000 | -3.186927000  | -1.293028000 |
| C  | -2.107599000 | -3.428036000  | -2.642701000 |
| C  | -3.726277000 | -2.856574000  | -0.960296000 |
| C  | -3.088681000 | -3.338754000  | -3.622848000 |
| H  | -1.082450000 | -3.676157000  | -2.915712000 |
| C  | -4.710138000 | -2.775954000  | -1.938635000 |
| H  | -3.993818000 | -2.644056000  | 0.074716000  |
| C  | -4.399171000 | -3.014851000  | -3.276305000 |
| H  | -2.829309000 | -3.529910000  | -4.662624000 |
| H  | -5.729190000 | -2.520801000  | -1.653349000 |
| H  | -5.171220000 | -2.952079000  | -4.039616000 |
| N  | -2.368570000 | -5.099627000  | 1.518866000  |
| H  | -1.757460000 | -5.900857000  | 1.342191000  |
| H  | -3.251669000 | -5.169224000  | 1.002760000  |
| O  | -2.665706000 | -5.033353000  | 2.893318000  |
| C  | -3.403539000 | -6.102731000  | 3.342013000  |
| C  | -2.729194000 | -7.135525000  | 3.982018000  |
| C  | -4.806302000 | -6.134764000  | 3.270870000  |
| C  | -3.429512000 | -8.200645000  | 4.528214000  |
| H  | -1.647003000 | -7.079053000  | 4.051088000  |
| C  | -5.522162000 | -7.180201000  | 3.830240000  |
| C  | -4.815283000 | -8.202914000  | 4.437841000  |
| H  | -2.917956000 | -9.018922000  | 5.023318000  |
| H  | -6.605793000 | -7.194426000  | 3.786897000  |
| N  | -5.574785000 | -5.067885000  | 2.631966000  |
| O  | -6.720517000 | -4.901864000  | 3.003306000  |
| O  | -5.028208000 | -4.411387000  | 1.753745000  |
| N  | -5.566374000 | -9.323916000  | 5.015247000  |
| O  | -6.781821000 | -9.297396000  | 4.920348000  |
| O  | -4.926379000 | -10.211101000 | 5.553578000  |

## 23

Temperature = 298.150 K

Pressure = 1.00000 Atm

6-31G(d,p)[LANL2DZ]

Electronic Energy = -3144.13050787

Electronic and Zero-Point Energy = -3143.192639

Enthalpy = -3143.130454

Free Energy = -3143.288036

## 6-311++G(2d,2p)[LANL2TZ(f)]

Electronic Energy = -3144.95924142

|    |              |              |              |
|----|--------------|--------------|--------------|
| Rh | -0.640296000 | -1.083474000 | -0.037061000 |
| C  | 1.962383000  | -1.212662000 | 1.273953000  |
| C  | 3.105521000  | -1.890246000 | 2.035861000  |
| C  | 3.314914000  | -1.142808000 | 3.354737000  |
| H  | 3.547441000  | -0.087430000 | 3.181122000  |
| H  | 4.146261000  | -1.595227000 | 3.909861000  |
| H  | 2.418920000  | -1.200593000 | 3.985631000  |
| C  | 2.792980000  | -3.352552000 | 2.329912000  |
| H  | 1.893930000  | -3.444290000 | 2.950300000  |
| H  | 3.631681000  | -3.802135000 | 2.877375000  |
| H  | 2.631985000  | -3.930462000 | 1.413987000  |
| O  | 0.973666000  | -1.942909000 | 0.953880000  |
| O  | 1.346845000  | 0.468879000  | -1.894211000 |
| C  | 4.032104000  | -3.273032000 | -2.826250000 |
| H  | 3.943554000  | -3.646295000 | -3.846457000 |
| C  | 3.691679000  | -1.946468000 | -2.547628000 |
| C  | 3.166988000  | -1.023536000 | -3.612596000 |
| H  | 3.572909000  | -1.307955000 | -4.594587000 |
| H  | 3.506287000  | 0.000213000  | -3.407692000 |
| C  | 1.624711000  | -0.998620000 | -3.750731000 |
| C  | 1.111054000  | -2.338368000 | -4.263980000 |
| H  | 1.366885000  | -3.161423000 | -3.588994000 |
| H  | 1.555864000  | -2.547888000 | -5.245645000 |
| H  | 0.021325000  | -2.323259000 | -4.378485000 |
| C  | 1.245165000  | 0.102765000  | -4.742943000 |
| H  | 0.157302000  | 0.152490000  | -4.876800000 |
| H  | 1.694131000  | -0.108558000 | -5.721638000 |
| H  | 1.596915000  | 1.082236000  | -4.403653000 |
| C  | 1.019944000  | -0.648657000 | -2.387003000 |
| O  | 0.248555000  | -1.509425000 | -1.862321000 |
| O  | 2.099521000  | 0.016660000  | 1.018918000  |
| C  | 4.397659000  | -1.768374000 | 1.190999000  |
| H  | 4.678108000  | -0.707729000 | 1.151326000  |
| H  | 5.192808000  | -2.292407000 | 1.741492000  |
| C  | 4.291126000  | -2.309799000 | -0.207956000 |
| C  | 4.624140000  | -3.632366000 | -0.512828000 |
| H  | 4.998447000  | -4.286218000 | 0.274846000  |
| C  | 4.497419000  | -4.108686000 | -1.814766000 |
| H  | 4.771583000  | -5.136181000 | -2.044505000 |
| C  | 3.838732000  | -1.483395000 | -1.238698000 |
| H  | 3.584630000  | -0.447773000 | -1.012865000 |
| O  | -2.132626000 | -0.047698000 | -1.073890000 |
| C  | -4.481094000 | 1.618119000  | -1.267241000 |
| H  | -4.711061000 | 0.543380000  | -1.256497000 |
| H  | -5.287448000 | 2.118433000  | -1.824194000 |
| C  | -4.432706000 | 2.132778000  | 0.144930000  |
| C  | -4.842618000 | 3.428173000  | 0.472394000  |
| H  | -5.237883000 | 4.078977000  | -0.307662000 |

|    |              |              |              |
|----|--------------|--------------|--------------|
| C  | -4.763347000 | 3.881649000  | 1.786167000  |
| H  | -5.096417000 | 4.887582000  | 2.033143000  |
| C  | -3.953117000 | 1.308034000  | 1.165223000  |
| H  | -3.647399000 | 0.291311000  | 0.917949000  |
| O  | -0.329741000 | 1.447922000  | 1.822190000  |
| O  | -1.420527000 | -0.533477000 | 1.819801000  |
| C  | -4.266750000 | 3.051013000  | 2.786802000  |
| H  | -4.211711000 | 3.406997000  | 3.815592000  |
| C  | -3.849494000 | 1.751618000  | 2.485399000  |
| C  | -3.281792000 | 0.840917000  | 3.539369000  |
| H  | -3.706634000 | 1.088445000  | 4.523451000  |
| H  | -3.563610000 | -0.197441000 | 3.318141000  |
| C  | -1.741180000 | 0.898371000  | 3.684630000  |
| C  | -1.300753000 | 2.261070000  | 4.204060000  |
| H  | -1.585846000 | 3.069132000  | 3.522625000  |
| H  | -1.770571000 | 2.450419000  | 5.178047000  |
| H  | -0.213962000 | 2.298548000  | 4.335497000  |
| C  | -1.306005000 | -0.187598000 | 4.672249000  |
| H  | -0.215991000 | -0.189193000 | 4.799280000  |
| H  | -1.758455000 | -0.000245000 | 5.654207000  |
| H  | -1.615640000 | -1.181938000 | 4.332041000  |
| C  | -1.104671000 | 0.589007000  | 2.326358000  |
| O  | -1.031235000 | 1.926028000  | -1.005103000 |
| C  | -2.009998000 | 1.189820000  | -1.319831000 |
| C  | -3.178558000 | 1.826719000  | -2.079203000 |
| C  | -3.325133000 | 1.099409000  | -3.418665000 |
| H  | -3.512003000 | 0.029808000  | -3.268955000 |
| H  | -4.164883000 | 1.525522000  | -3.982403000 |
| H  | -2.419779000 | 1.213994000  | -4.028475000 |
| C  | -2.933651000 | 3.309199000  | -2.330347000 |
| H  | -2.029009000 | 3.462697000  | -2.928758000 |
| H  | -3.784237000 | 3.732029000  | -2.880917000 |
| H  | -2.818397000 | 3.868278000  | -1.395969000 |
| Rh | 0.596244000  | 1.071783000  | -0.018173000 |
| C  | -1.673187000 | -2.980301000 | -0.057829000 |
| H  | -1.046519000 | -3.561501000 | -0.748124000 |
| C  | -1.554343000 | -3.479623000 | 1.344961000  |
| H  | -0.515162000 | -3.612813000 | 1.657990000  |
| H  | -2.084727000 | -2.871714000 | 2.086460000  |
| C  | -3.034040000 | -2.775737000 | -0.584807000 |
| C  | -3.281233000 | -2.945590000 | -1.957254000 |
| C  | -4.100385000 | -2.344603000 | 0.221118000  |
| C  | -4.533420000 | -2.692707000 | -2.500663000 |
| H  | -2.460129000 | -3.267157000 | -2.599333000 |
| C  | -5.356783000 | -2.096133000 | -0.321621000 |
| H  | -3.940501000 | -2.169253000 | 1.285574000  |
| C  | -5.582903000 | -2.267637000 | -1.685106000 |
| H  | -4.695868000 | -2.831903000 | -3.567774000 |
| H  | -6.162341000 | -1.756604000 | 0.327109000  |
| H  | -6.565613000 | -2.074526000 | -2.108706000 |
| N  | -2.194969000 | -4.854677000 | 1.447700000  |

|   |              |               |             |
|---|--------------|---------------|-------------|
| H | -1.731453000 | -5.521208000  | 0.815960000 |
| H | -3.207082000 | -4.782107000  | 1.235968000 |
| O | -2.086440000 | -5.322501000  | 2.783337000 |
| C | -2.641898000 | -6.573996000  | 2.967889000 |
| C | -1.765472000 | -7.645638000  | 3.062742000 |
| C | -4.017119000 | -6.776269000  | 3.173181000 |
| C | -2.244072000 | -8.918555000  | 3.340734000 |
| H | -0.704363000 | -7.460055000  | 2.926826000 |
| C | -4.506376000 | -8.037837000  | 3.466420000 |
| C | -3.607387000 | -9.088061000  | 3.532221000 |
| H | -1.575879000 | -9.769821000  | 3.411871000 |
| H | -5.566103000 | -8.193838000  | 3.637142000 |
| N | -4.986385000 | -5.684008000  | 3.116024000 |
| O | -6.028176000 | -5.824291000  | 3.721215000 |
| O | -4.699099000 | -4.689863000  | 2.454967000 |
| N | -4.124728000 | -10.431823000 | 3.828699000 |
| O | -5.327867000 | -10.549312000 | 3.983225000 |
| O | -3.315456000 | -11.339795000 | 3.900546000 |

### TS5

Lowest Frequency Vibration = -569.7282 cm<sup>\*\*</sup>-1

Temperature = 298.150 K

Pressure = 1.00000 Atm

### 6-31G(d,p)[LANL2DZ]

Electronic Energy = -3144.11863196

Electronic and Zero-Point Energy = -3143.184118

Enthalpy = -3143.121738

Free Energy = -3143.279774

### 6-311++G(2d,2p)[LANL2TZ(f)]

Electronic Energy = -3144.94771598

|    |              |              |              |
|----|--------------|--------------|--------------|
| Rh | -0.713753000 | -1.058055000 | -0.028859000 |
| C  | 1.878288000  | -1.271328000 | 1.287586000  |
| C  | 2.993923000  | -1.980871000 | 2.056983000  |
| C  | 3.221833000  | -1.233130000 | 3.372774000  |
| H  | 3.488966000  | -0.186646000 | 3.195082000  |
| H  | 4.036639000  | -1.709754000 | 3.931772000  |
| H  | 2.322912000  | -1.259935000 | 4.001163000  |
| C  | 2.628794000  | -3.430139000 | 2.355393000  |
| H  | 1.724260000  | -3.488115000 | 2.971791000  |
| H  | 3.448909000  | -3.905310000 | 2.908891000  |
| H  | 2.452744000  | -4.006132000 | 1.441000000  |
| O  | 0.865090000  | -1.965319000 | 0.964582000  |
| O  | 1.327147000  | 0.417632000  | -1.878166000 |
| C  | 3.880058000  | -3.411543000 | -2.795671000 |
| H  | 3.779440000  | -3.785041000 | -3.814583000 |
| C  | 3.590314000  | -2.071885000 | -2.522693000 |
| C  | 3.101241000  | -1.134015000 | -3.591392000 |



|   |              |              |              |
|---|--------------|--------------|--------------|
| H | 3.499066000  | -1.434279000 | -4.571782000 |
| H | 3.474627000  | -0.121854000 | -3.388258000 |
| C | 1.560870000  | -1.057928000 | -3.735114000 |
| C | 1.003123000  | -2.380257000 | -4.247465000 |
| H | 1.227180000  | -3.209990000 | -3.569380000 |
| H | 1.445675000  | -2.606631000 | -5.226163000 |
| H | -0.084664000 | -2.327356000 | -4.368134000 |
| C | 1.221053000  | 0.055480000  | -4.728602000 |
| H | 0.136260000  | 0.140317000  | -4.867756000 |
| H | 1.667472000  | -0.172129000 | -5.704601000 |
| H | 1.603693000  | 1.023223000  | -4.389189000 |
| C | 0.964149000  | -0.688950000 | -2.374920000 |
| O | 0.160868000  | -1.518626000 | -1.849142000 |
| O | 2.052755000  | -0.046938000 | 1.024896000  |
| C | 4.292880000  | -1.906783000 | 1.216509000  |
| H | 4.612229000  | -0.857249000 | 1.175057000  |
| H | 5.065520000  | -2.457419000 | 1.772675000  |
| C | 4.170981000  | -2.448910000 | -0.180768000 |
| C | 4.453419000  | -3.784441000 | -0.479730000 |
| H | 4.800513000  | -4.449160000 | 0.311198000  |
| C | 4.311363000  | -4.260396000 | -1.780177000 |
| H | 4.546438000  | -5.298440000 | -2.005503000 |
| C | 3.753327000  | -1.609433000 | -1.215545000 |
| H | 3.542144000  | -0.563034000 | -0.994758000 |
| O | -2.168008000 | 0.023628000  | -1.072199000 |
| C | -4.442480000 | 1.795524000  | -1.280177000 |
| H | -4.722111000 | 0.732977000  | -1.267944000 |
| H | -5.223142000 | 2.332146000  | -1.839529000 |
| C | -4.369167000 | 2.311146000  | 0.130383000  |
| C | -4.707689000 | 3.628149000  | 0.452681000  |
| H | -5.065632000 | 4.296742000  | -0.330254000 |
| C | -4.605473000 | 4.081312000  | 1.764959000  |
| H | -4.883298000 | 5.104807000  | 2.007753000  |
| C | -3.937509000 | 1.465142000  | 1.154567000  |
| H | -3.689604000 | 0.431430000  | 0.912760000  |
| O | -0.322733000 | 1.448662000  | 1.816315000  |
| O | -1.483410000 | -0.489145000 | 1.815712000  |
| C | -4.156028000 | 3.228652000  | 2.769366000  |
| H | -4.082589000 | 3.585039000  | 3.796787000  |
| C | -3.810752000 | 1.907280000  | 2.473057000  |
| C | -3.293468000 | 0.969931000  | 3.529375000  |
| H | -3.709096000 | 1.236907000  | 4.512072000  |
| H | -3.624485000 | -0.053536000 | 3.306375000  |
| C | -1.752135000 | 0.953646000  | 3.682155000  |
| C | -1.247908000 | 2.291804000  | 4.207314000  |
| H | -1.494160000 | 3.115657000  | 3.529744000  |
| H | -1.709357000 | 2.497929000  | 5.181666000  |
| H | -0.160746000 | 2.277020000  | 4.340230000  |
| C | -1.373047000 | -0.156612000 | 4.666092000  |
| H | -0.285502000 | -0.207663000 | 4.801622000  |
| H | -1.824451000 | 0.047213000  | 5.645018000  |

|    |              |               |              |
|----|--------------|---------------|--------------|
| H  | -1.724912000 | -1.134273000  | 4.318930000  |
| C  | -1.129115000 | 0.620185000   | 2.325765000  |
| O  | -0.989980000 | 1.949417000   | -1.005237000 |
| C  | -1.998123000 | 1.253598000   | -1.325493000 |
| C  | -3.131348000 | 1.938918000   | -2.092369000 |
| C  | -3.309033000 | 1.210177000   | -3.427173000 |
| H  | -3.538821000 | 0.149920000   | -3.271436000 |
| H  | -4.132472000 | 1.667206000   | -3.990410000 |
| H  | -2.401748000 | 1.285783000   | -4.039678000 |
| C  | -2.815771000 | 3.406657000   | -2.351363000 |
| H  | -1.903613000 | 3.514010000   | -2.948321000 |
| H  | -3.644303000 | 3.864200000   | -2.907401000 |
| H  | -2.677864000 | 3.965880000   | -1.420193000 |
| Rh | 0.581231000  | 1.027596000   | -0.014968000 |
| C  | -1.859741000 | -2.979270000  | -0.082851000 |
| H  | -1.216592000 | -3.533991000  | -0.776229000 |
| C  | -1.716631000 | -3.429189000  | 1.347175000  |
| H  | -0.674543000 | -3.502651000  | 1.665266000  |
| H  | -2.287816000 | -2.831930000  | 2.064135000  |
| C  | -3.187012000 | -2.673756000  | -0.622137000 |
| C  | -3.415108000 | -2.812783000  | -2.001076000 |
| C  | -4.232169000 | -2.179080000  | 0.174880000  |
| C  | -4.638915000 | -2.474698000  | -2.561791000 |
| H  | -2.605943000 | -3.183087000  | -2.631195000 |
| C  | -5.459170000 | -1.847632000  | -0.386150000 |
| H  | -4.081874000 | -2.038423000  | 1.245386000  |
| C  | -5.670699000 | -1.993105000  | -1.756081000 |
| H  | -4.792989000 | -2.591635000  | -3.632373000 |
| H  | -6.253625000 | -1.463820000  | 0.250838000  |
| H  | -6.631991000 | -1.733368000  | -2.192742000 |
| N  | -2.293808000 | -4.762865000  | 1.278542000  |
| H  | -1.733784000 | -5.441591000  | 0.756961000  |
| H  | -3.292999000 | -4.772788000  | 1.026379000  |
| O  | -2.454580000 | -5.511119000  | 2.827005000  |
| C  | -2.929629000 | -6.744391000  | 2.735336000  |
| C  | -2.037344000 | -7.823712000  | 2.874265000  |
| C  | -4.308534000 | -7.051057000  | 2.583660000  |
| C  | -2.481342000 | -9.130394000  | 2.888347000  |
| H  | -0.983985000 | -7.587169000  | 2.992202000  |
| C  | -4.770082000 | -8.355680000  | 2.615082000  |
| C  | -3.847002000 | -9.377502000  | 2.755135000  |
| H  | -1.792565000 | -9.961131000  | 2.998717000  |
| H  | -5.829244000 | -8.570384000  | 2.522948000  |
| N  | -5.313018000 | -6.010121000  | 2.421780000  |
| O  | -6.438324000 | -6.239757000  | 2.824878000  |
| O  | -4.988693000 | -4.958390000  | 1.873407000  |
| N  | -4.327939000 | -10.755987000 | 2.766916000  |
| O  | -5.529114000 | -10.941661000 | 2.642877000  |
| O  | -3.498880000 | -11.642985000 | 2.900912000  |

**Concerted TS**

Lowest Frequency Vibration = -654.4925 cm\*\*<sup>-1</sup>  
Temperature = 298.150 K  
Pressure = 1.00000 Atm

6-31G(d,p)[LANL2DZ]

Electronic Energy = -3144.10604316  
Electronic and Zero-Point Energy = -3143.173210  
Enthalpy = -3143.110271  
Free Energy = -3143.267887

6-311++G(2d,2p)[LANL2TZ(f)]

Electronic Energy = -3144.93970009

|    |              |              |              |
|----|--------------|--------------|--------------|
| Rh | -2.490089000 | -2.700380000 | -2.053089000 |
| C  | 0.002599000  | -3.214438000 | -3.479413000 |
| C  | 1.383610000  | -3.832385000 | -3.683630000 |
| C  | 2.397507000  | -2.703895000 | -3.884809000 |
| H  | 2.133251000  | -2.076623000 | -4.741801000 |
| H  | 3.391052000  | -3.133286000 | -4.062199000 |
| H  | 2.460938000  | -2.067445000 | -2.994002000 |
| C  | 1.792082000  | -4.675455000 | -2.481443000 |
| H  | 1.834472000  | -4.067017000 | -1.571157000 |
| H  | 2.789681000  | -5.096791000 | -2.658080000 |
| H  | 1.096509000  | -5.501447000 | -2.302875000 |
| O  | -0.641326000 | -3.549652000 | -2.439530000 |
| O  | -3.262356000 | -3.121440000 | -5.031591000 |
| C  | -1.853308000 | -7.577513000 | -5.042471000 |
| H  | -2.664532000 | -8.304701000 | -5.069168000 |
| C  | -2.065911000 | -6.289810000 | -5.541655000 |
| C  | -3.400508000 | -5.856137000 | -6.080312000 |
| H  | -3.927917000 | -6.709823000 | -6.529734000 |
| H  | -3.249344000 | -5.116011000 | -6.876946000 |
| C  | -4.360073000 | -5.242323000 | -5.029545000 |
| C  | -4.823281000 | -6.300096000 | -4.034731000 |
| H  | -3.987117000 | -6.736654000 | -3.478576000 |
| H  | -5.337575000 | -7.104990000 | -4.574690000 |
| H  | -5.525543000 | -5.872647000 | -3.309408000 |
| C  | -5.573623000 | -4.664565000 | -5.761288000 |
| H  | -6.289716000 | -4.228379000 | -5.054769000 |
| H  | -6.086546000 | -5.466448000 | -6.306215000 |
| H  | -5.277971000 | -3.892622000 | -6.478578000 |
| C  | -3.630228000 | -4.103591000 | -4.319966000 |
| O  | -3.432839000 | -4.224236000 | -3.071692000 |
| O  | -0.411818000 | -2.416233000 | -4.371787000 |
| C  | 1.342496000  | -4.694353000 | -4.971139000 |
| H  | 1.235220000  | -4.019324000 | -5.830306000 |
| H  | 2.326418000  | -5.176825000 | -5.060867000 |
| C  | 0.247866000  | -5.724151000 | -5.003758000 |
| C  | 0.435739000  | -7.018259000 | -4.511466000 |
| H  | 1.411690000  | -7.308857000 | -4.123351000 |

|    |              |              |              |
|----|--------------|--------------|--------------|
| C  | -0.608665000 | -7.938469000 | -4.534022000 |
| H  | -0.448609000 | -8.947741000 | -4.161135000 |
| C  | -1.002546000 | -5.385545000 | -5.523834000 |
| H  | -1.153473000 | -4.384470000 | -5.928483000 |
| O  | -4.340484000 | -1.753747000 | -1.879182000 |
| C  | -6.115229000 | 0.411807000  | -1.185718000 |
| H  | -6.024487000 | -0.339694000 | -0.389883000 |
| H  | -7.104660000 | 0.878728000  | -1.076615000 |
| C  | -5.032901000 | 1.444562000  | -1.034880000 |
| C  | -5.242857000 | 2.782266000  | -1.379601000 |
| H  | -6.224218000 | 3.096693000  | -1.734186000 |
| C  | -4.214075000 | 3.711640000  | -1.256771000 |
| H  | -4.391617000 | 4.753190000  | -1.515486000 |
| C  | -3.774721000 | 1.070362000  | -0.557748000 |
| H  | -3.606674000 | 0.032408000  | -0.268505000 |
| O  | -1.341632000 | 0.003933000  | -3.090754000 |
| O  | -1.495560000 | -1.125188000 | -1.145118000 |
| C  | -2.961176000 | 3.315727000  | -0.798121000 |
| H  | -2.159386000 | 4.047000000  | -0.698417000 |
| C  | -2.724618000 | 1.983974000  | -0.447195000 |
| C  | -1.373424000 | 1.519062000  | 0.020966000  |
| H  | -0.841838000 | 2.339127000  | 0.524756000  |
| H  | -1.495630000 | 0.713634000  | 0.757161000  |
| C  | -0.439597000 | 1.007643000  | -1.104635000 |
| C  | -0.065759000 | 2.138952000  | -2.054175000 |
| H  | -0.944596000 | 2.570790000  | -2.543504000 |
| H  | 0.438262000  | 2.933008000  | -1.488884000 |
| H  | 0.618720000  | 1.787821000  | -2.833767000 |
| C  | 0.829240000  | 0.437321000  | -0.464407000 |
| H  | 1.517677000  | 0.055071000  | -1.227811000 |
| H  | 1.347686000  | 1.230420000  | 0.087981000  |
| H  | 0.596746000  | -0.374552000 | 0.232102000  |
| C  | -1.147400000 | -0.123408000 | -1.846884000 |
| O  | -4.102656000 | -0.635692000 | -3.818797000 |
| C  | -4.743475000 | -0.949193000 | -2.773134000 |
| C  | -6.118656000 | -0.325801000 | -2.547939000 |
| C  | -7.144680000 | -1.461275000 | -2.485131000 |
| H  | -6.909820000 | -2.168655000 | -1.681430000 |
| H  | -8.141648000 | -1.043004000 | -2.299419000 |
| H  | -7.182219000 | -2.008615000 | -3.434713000 |
| C  | -6.479915000 | 0.629743000  | -3.678347000 |
| H  | -6.506926000 | 0.108460000  | -4.641121000 |
| H  | -7.474737000 | 1.052703000  | -3.489870000 |
| H  | -5.765767000 | 1.455765000  | -3.759472000 |
| Rh | -2.269721000 | -1.518862000 | -4.143148000 |
| H  | -3.348449000 | -5.427690000 | 1.461010000  |
| H  | -2.567911000 | -4.307951000 | 2.335908000  |
| O  | -2.861217000 | -6.070719000 | 3.411545000  |
| C  | -4.147350000 | -6.195532000 | 3.427749000  |
| C  | -5.095034000 | -5.129309000 | 3.618051000  |
| C  | -4.710565000 | -7.486303000 | 3.212825000  |

|   |              |              |              |
|---|--------------|--------------|--------------|
| C | -6.466018000 | -5.352379000 | 3.564230000  |
| C | -6.063123000 | -7.709042000 | 3.151162000  |
| H | -4.003031000 | -8.298656000 | 3.073430000  |
| C | -6.935349000 | -6.624015000 | 3.307895000  |
| H | -7.157187000 | -4.530358000 | 3.712337000  |
| H | -6.466052000 | -8.698325000 | 2.959820000  |
| N | -2.416701000 | -5.156555000 | 1.779475000  |
| N | -4.698988000 | -3.765868000 | 3.928032000  |
| O | -5.547889000 | -3.010440000 | 4.380951000  |
| O | -3.537827000 | -3.410789000 | 3.727784000  |
| N | -8.367415000 | -6.830903000 | 3.191386000  |
| O | -8.766310000 | -7.977043000 | 3.032809000  |
| O | -9.100194000 | -5.851444000 | 3.251642000  |
| C | -2.148783000 | -4.263324000 | -0.048347000 |
| C | -3.175411000 | -3.373647000 | 0.258700000  |
| H | -1.114770000 | -3.948693000 | 0.045522000  |
| H | -2.320734000 | -5.179119000 | -0.609540000 |
| H | -2.882819000 | -2.438737000 | 0.744416000  |
| C | -4.598459000 | -3.666061000 | 0.275480000  |
| C | -5.145438000 | -4.822879000 | -0.307134000 |
| C | -5.446301000 | -2.788574000 | 0.969252000  |
| C | -6.497819000 | -5.100371000 | -0.171418000 |
| C | -6.800999000 | -3.066436000 | 1.097580000  |
| C | -7.327437000 | -4.229070000 | 0.537448000  |
| H | -4.511324000 | -5.496330000 | -0.881918000 |
| H | -5.026172000 | -1.890586000 | 1.423173000  |
| H | -6.909965000 | -6.002651000 | -0.616461000 |
| H | -7.443962000 | -2.382794000 | 1.646783000  |
| H | -8.383678000 | -4.459499000 | 0.655339000  |

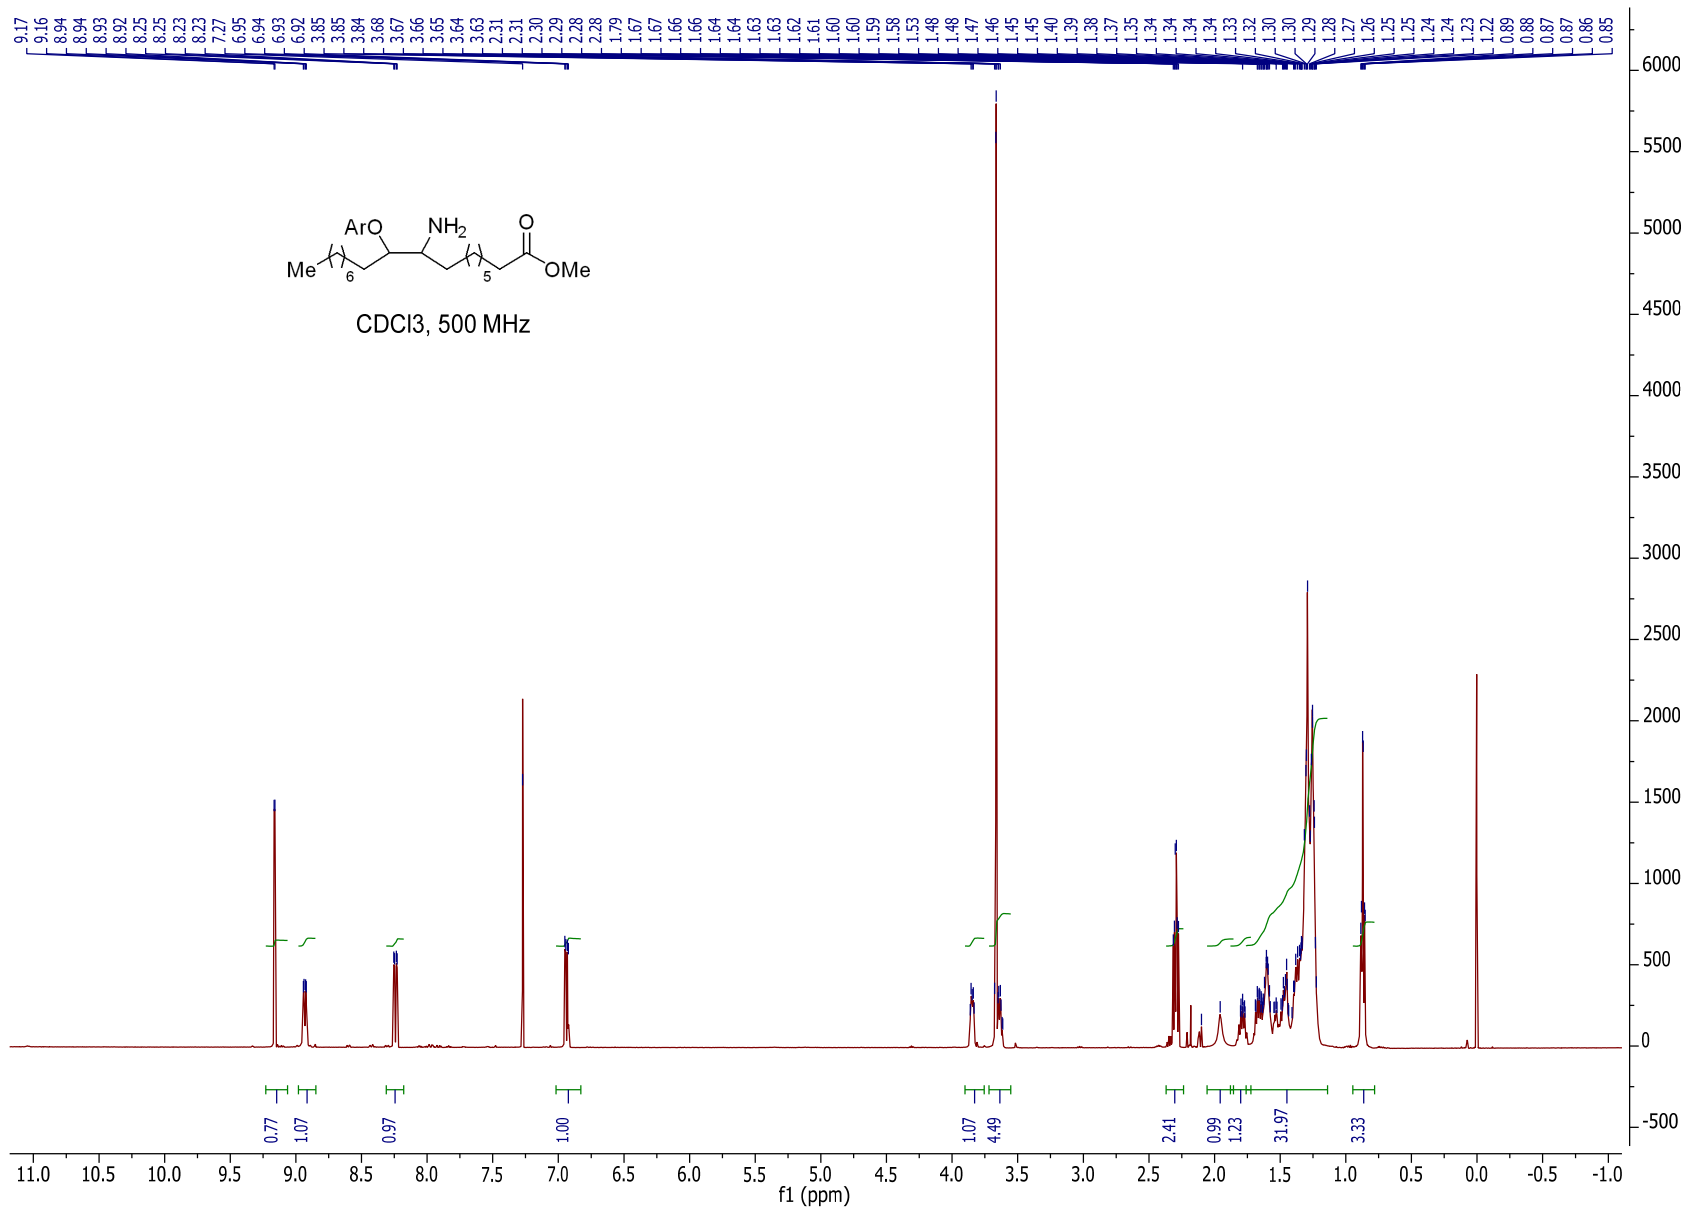

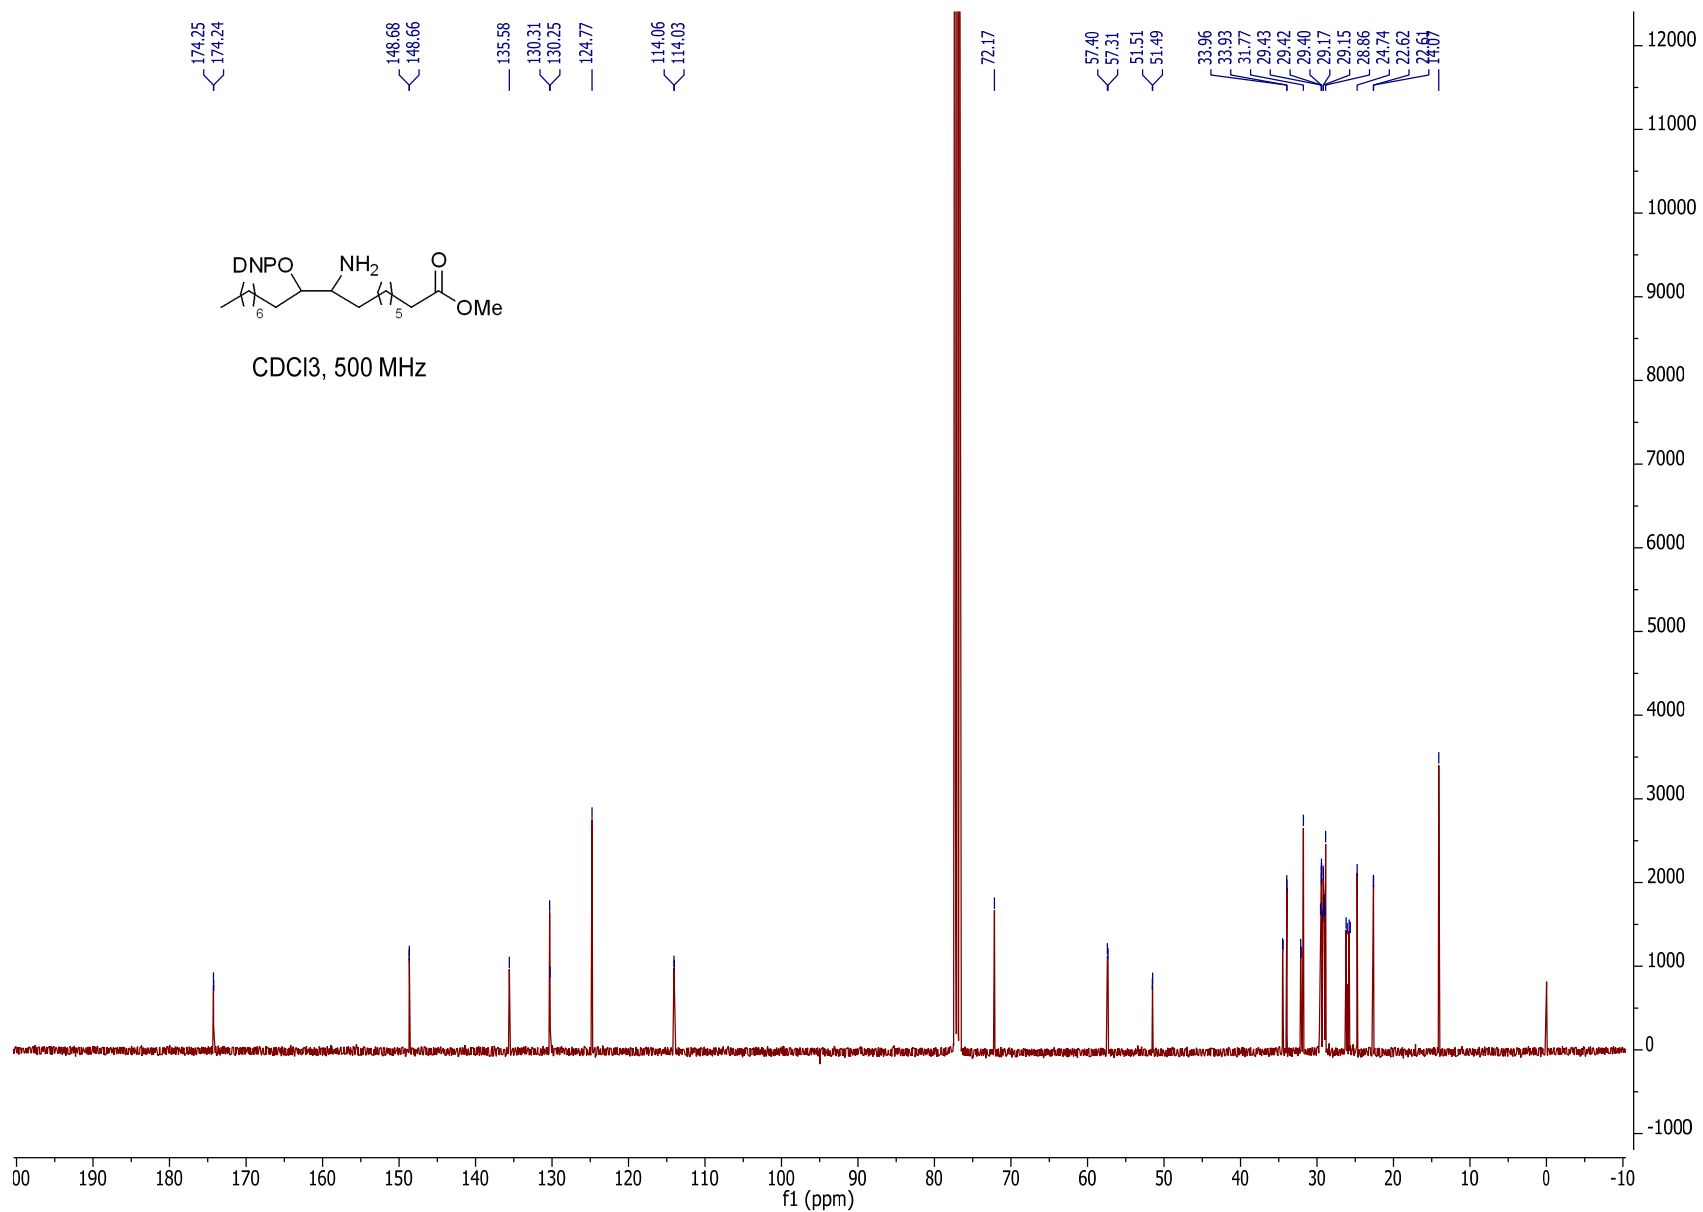

SI-103

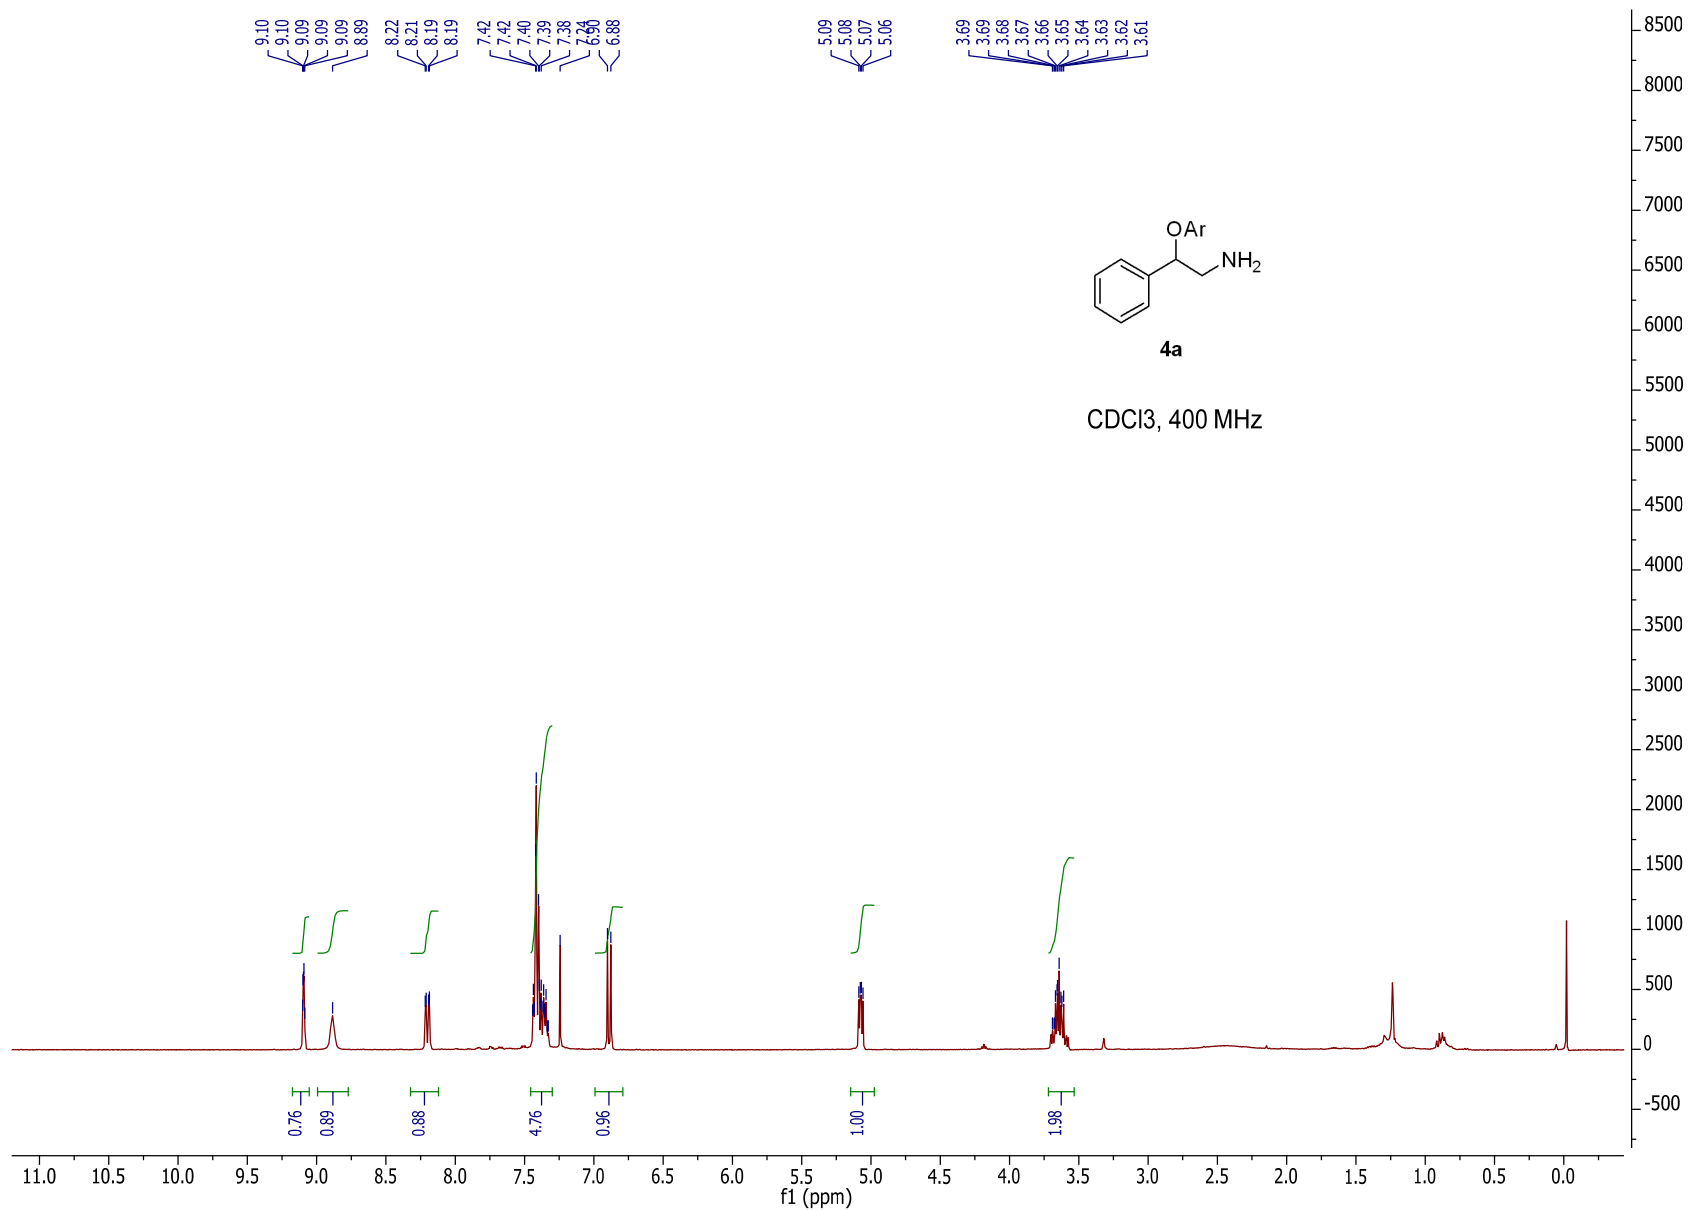

SI-104



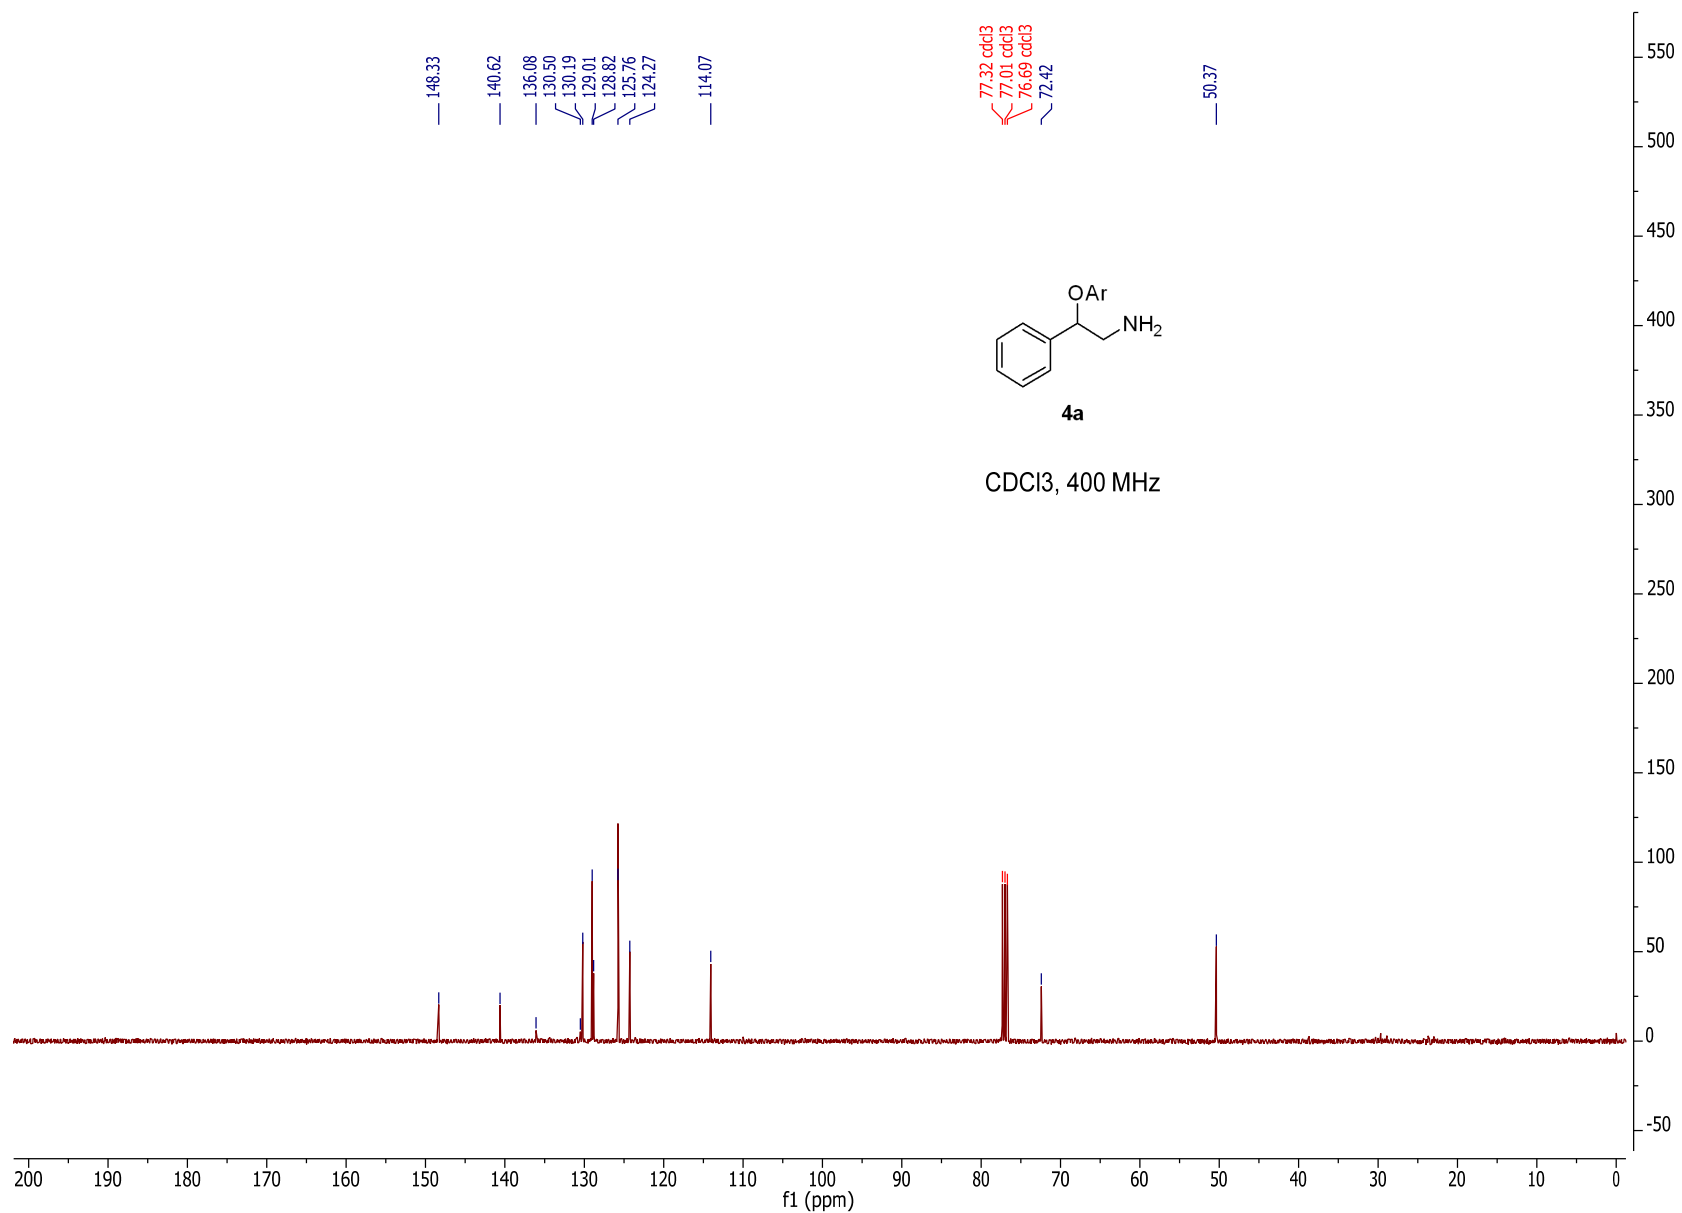

SI-105

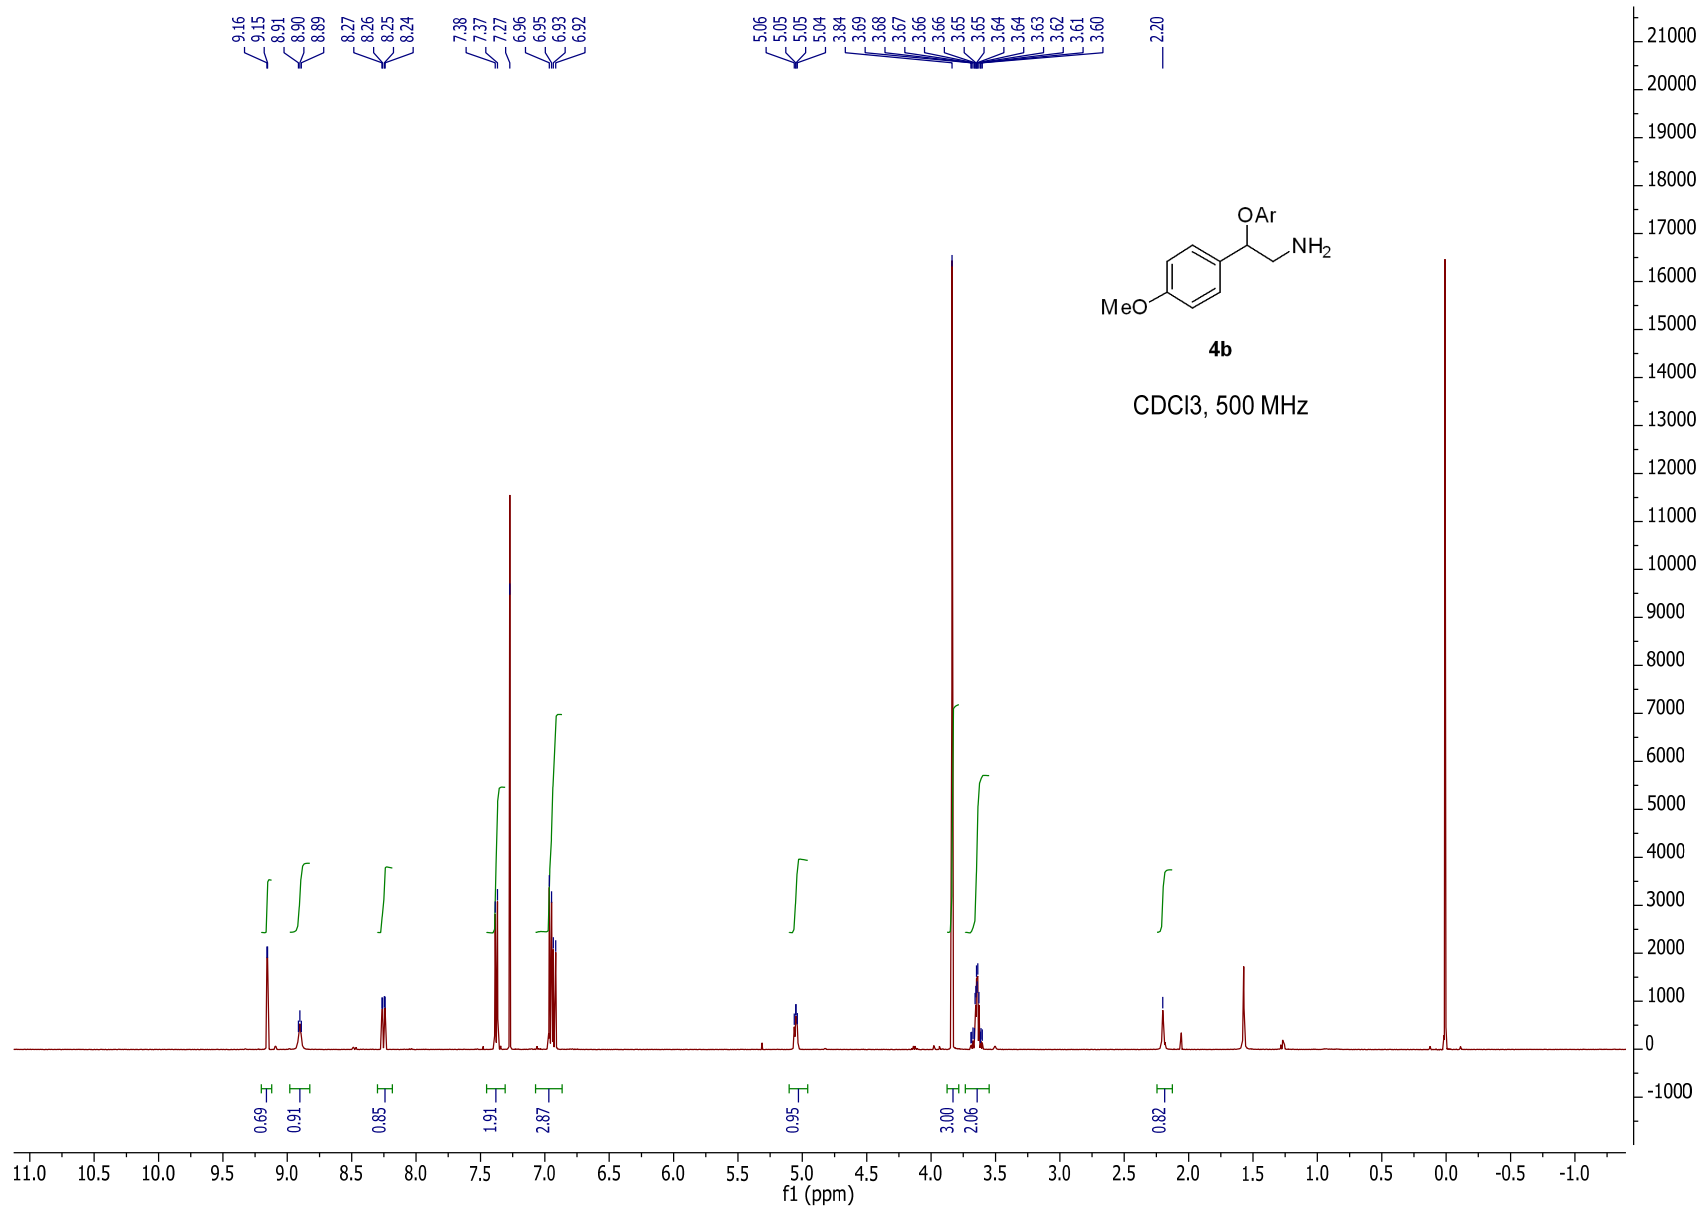

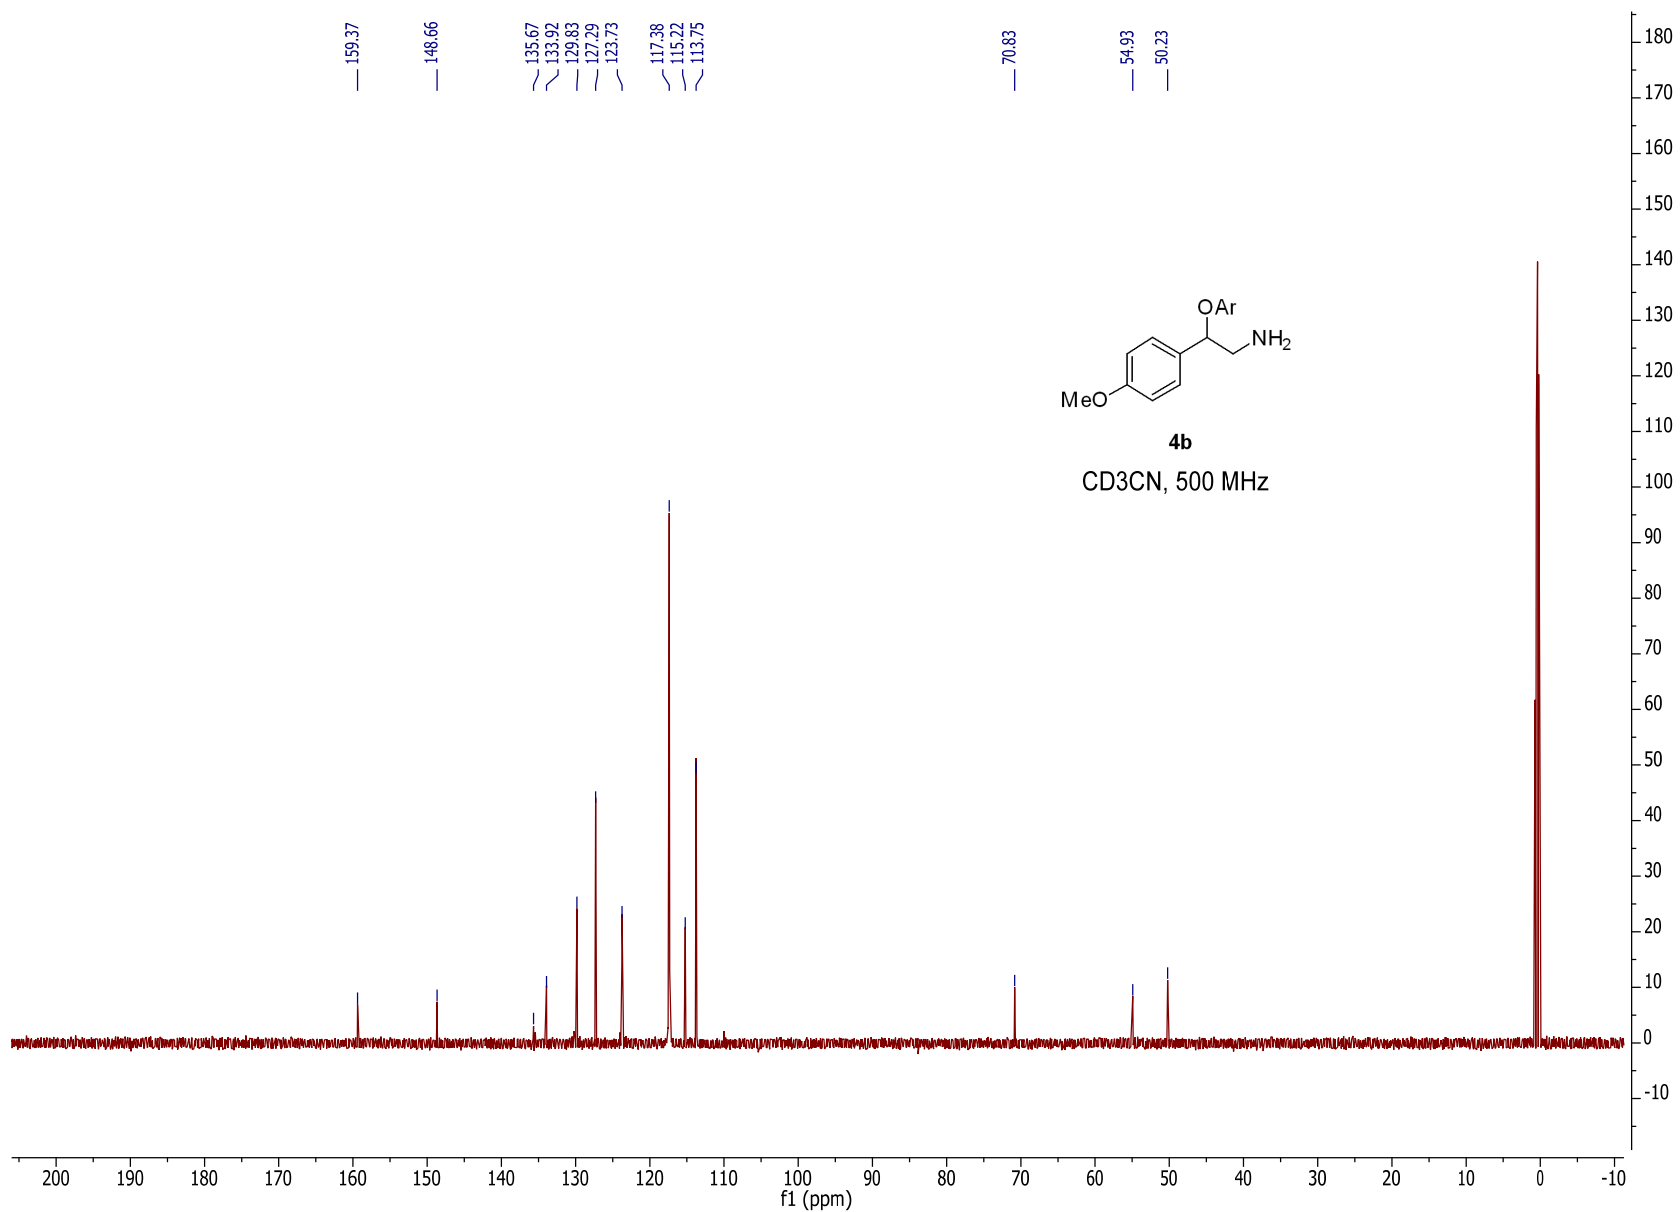

SI-107

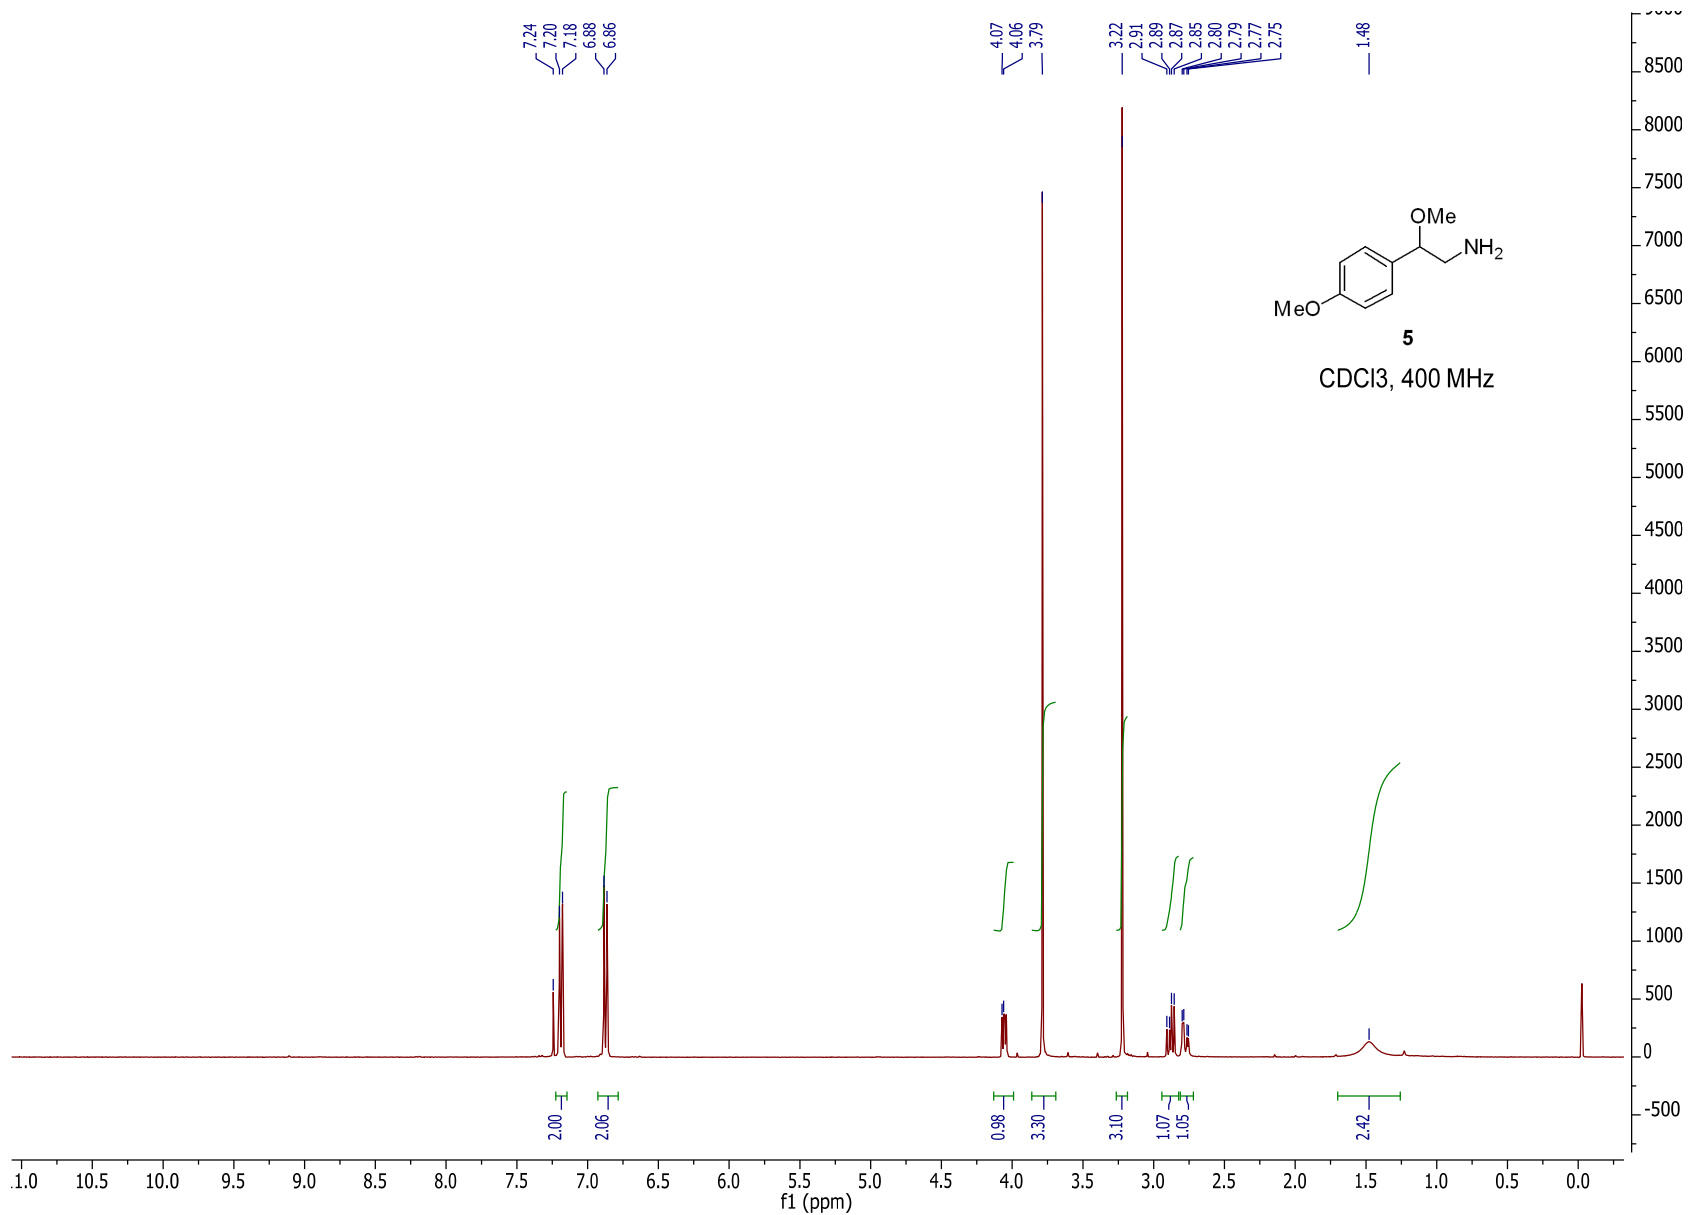

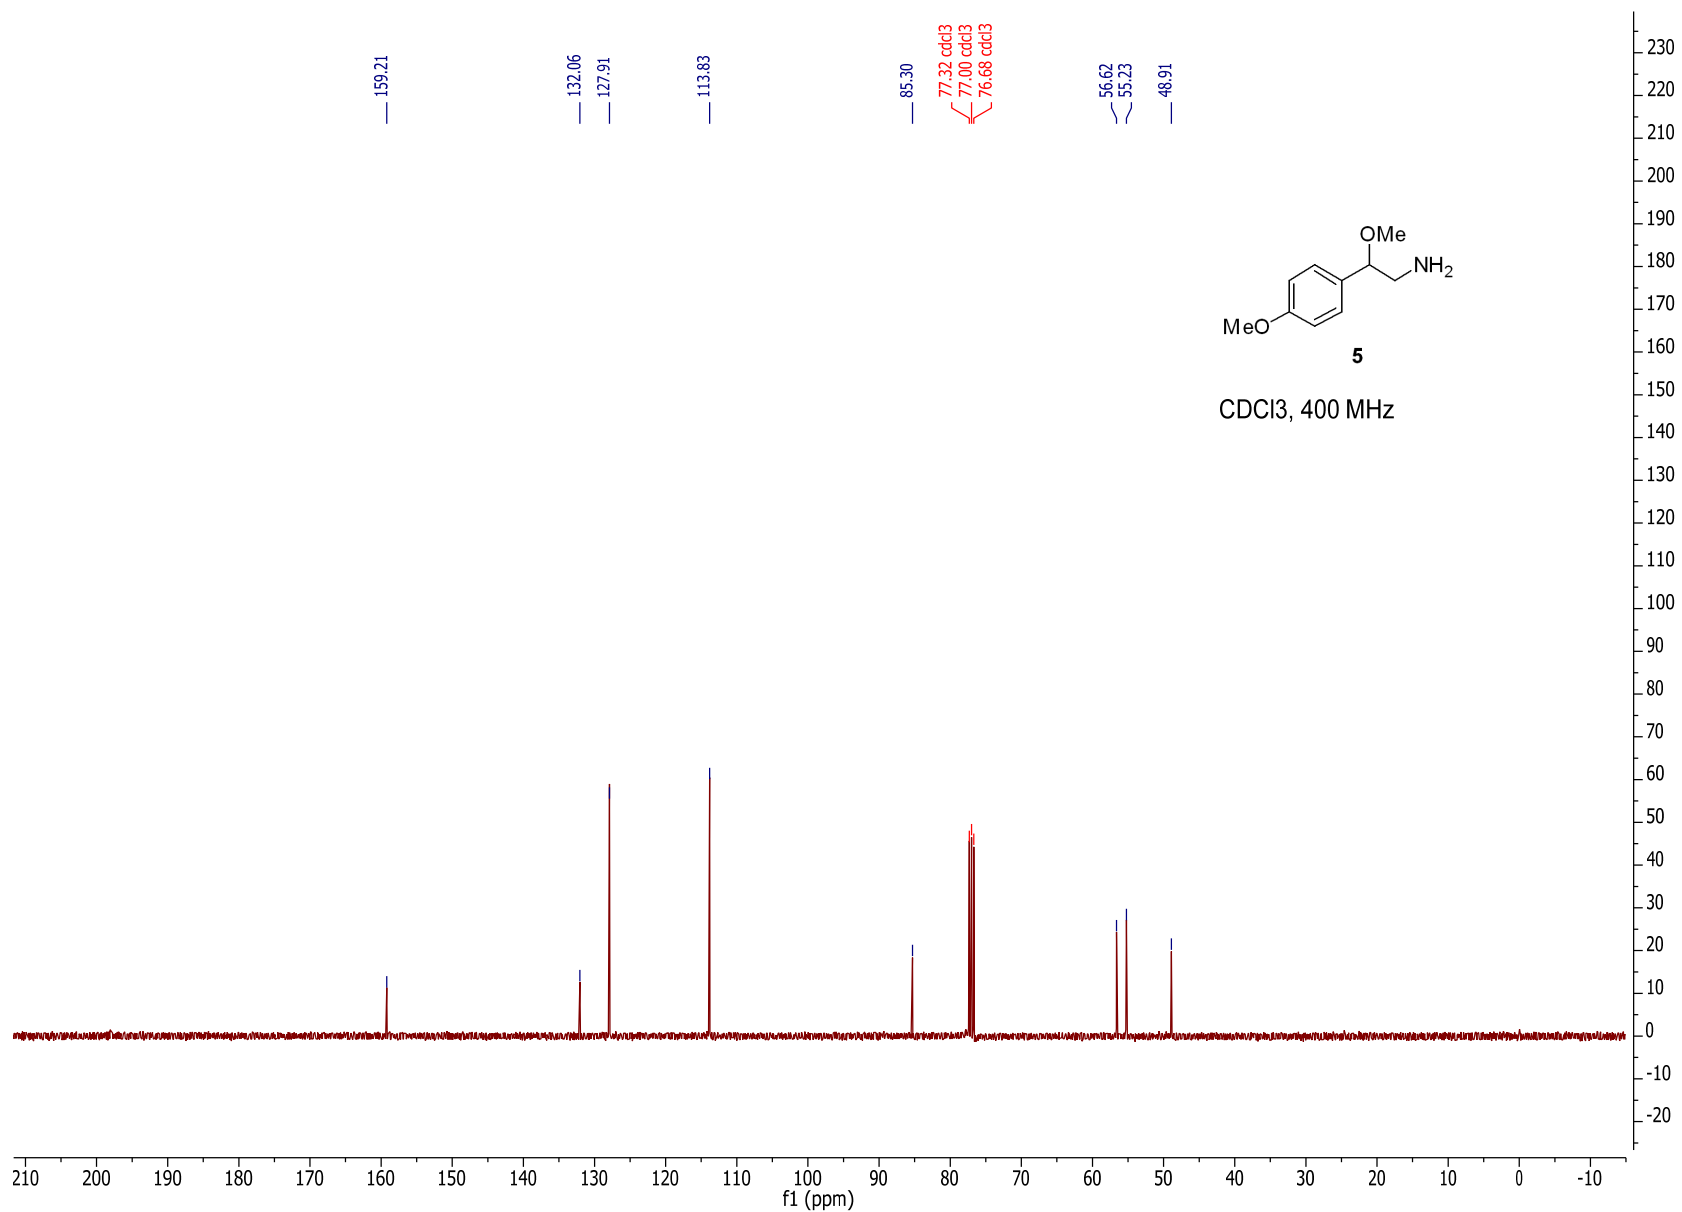

SI-109

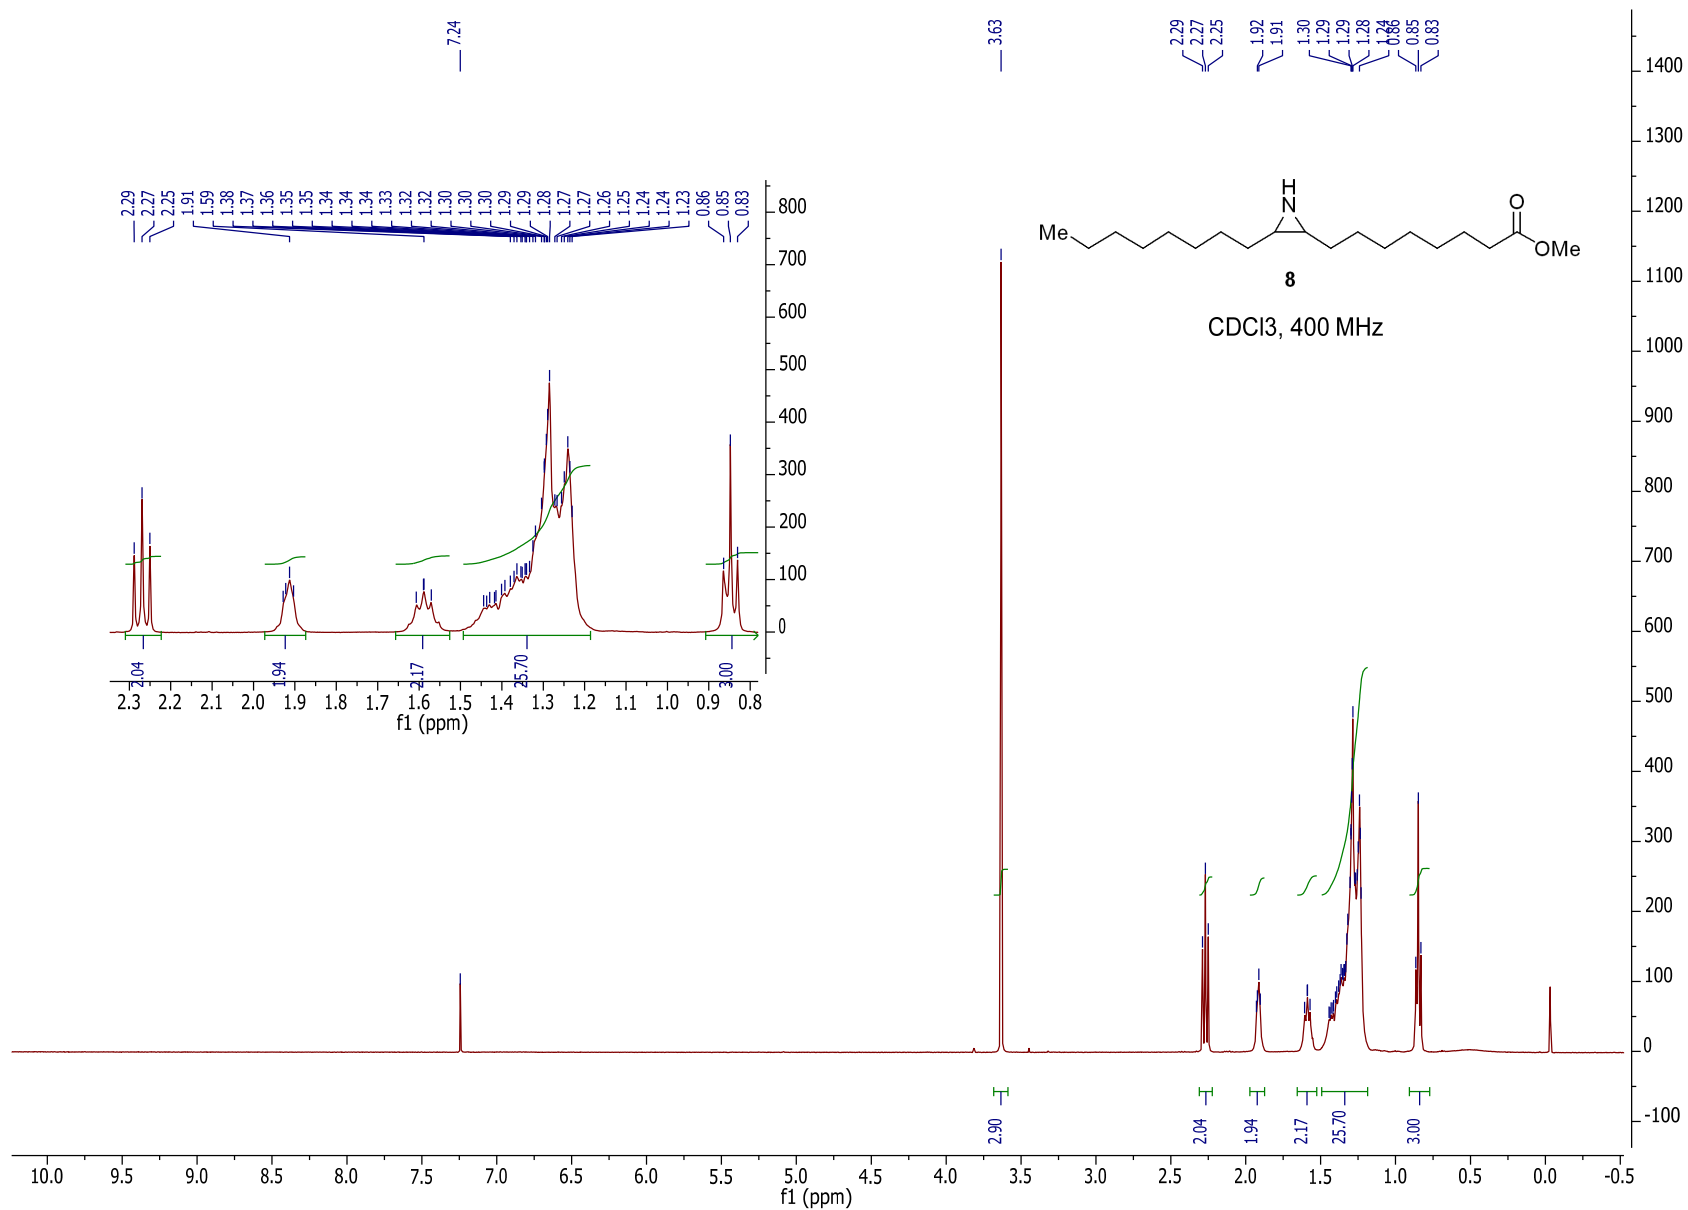

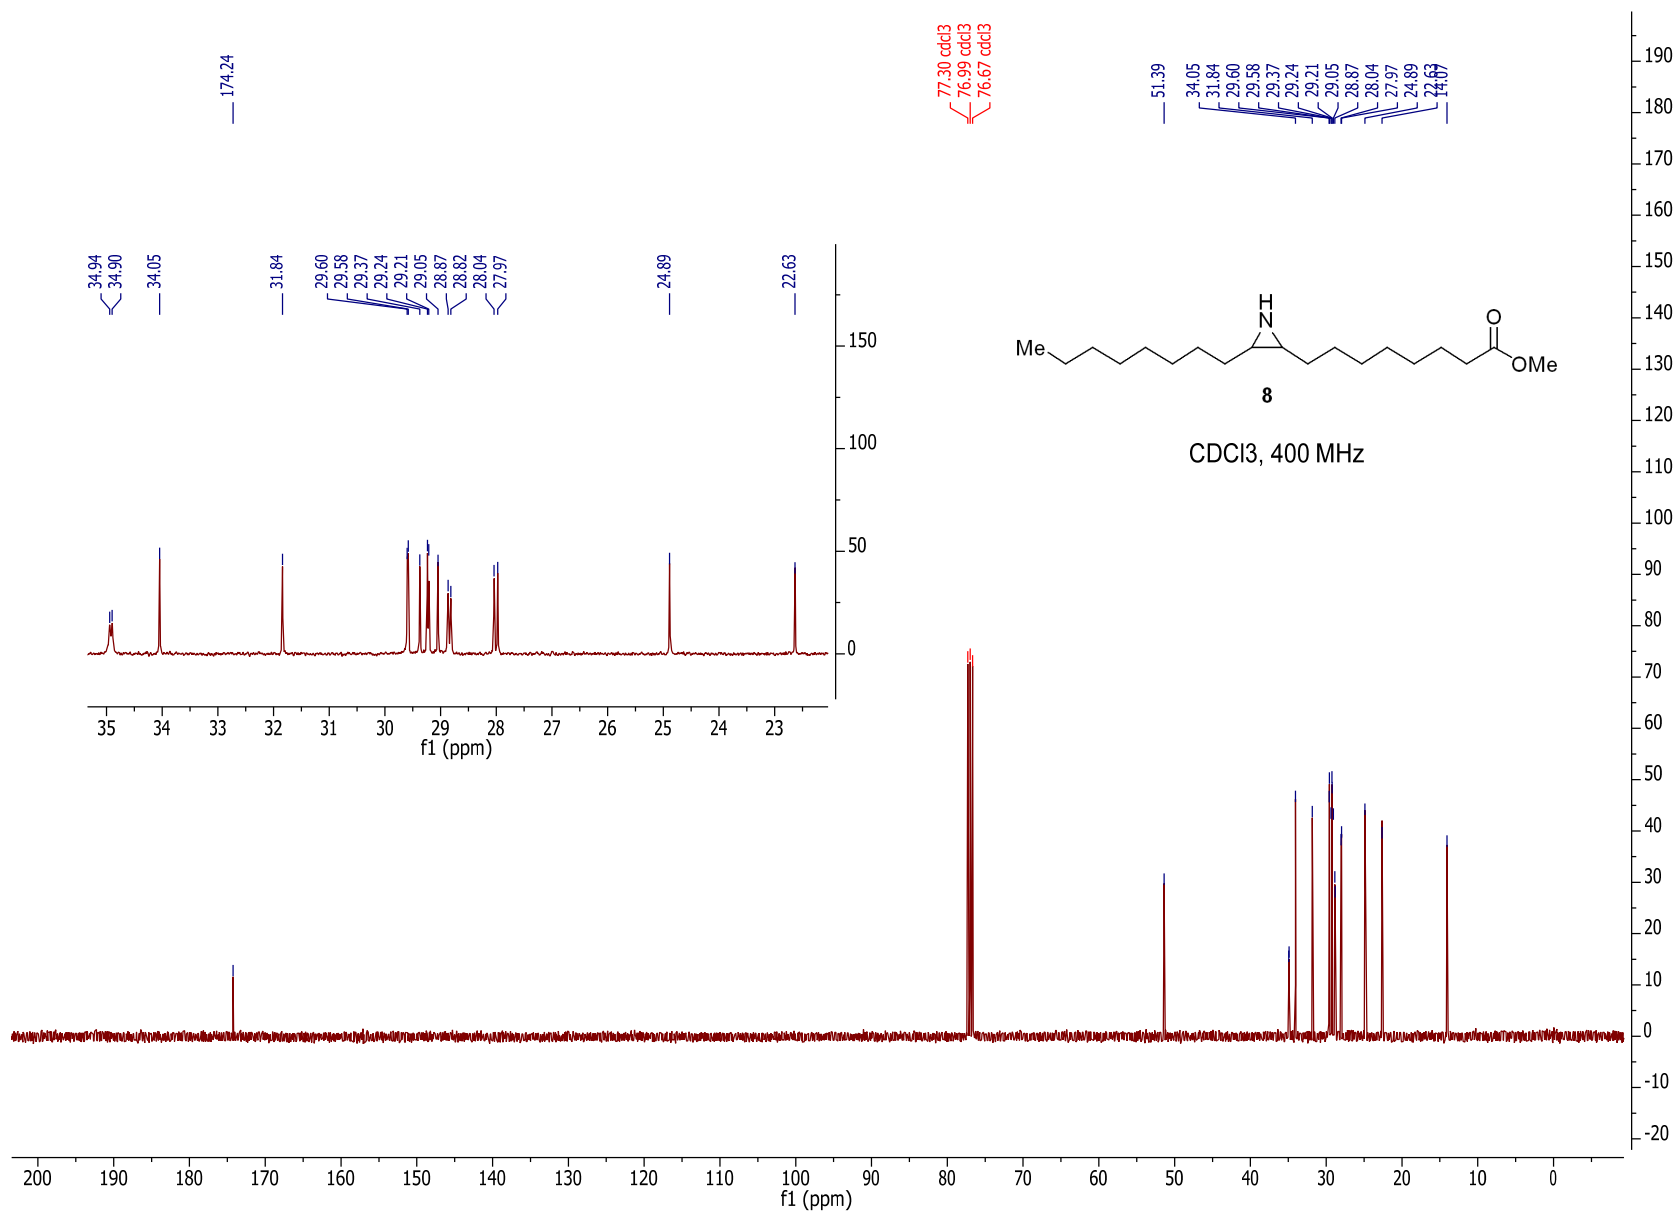

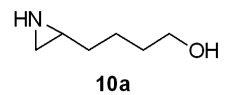

CDCl<sub>3</sub>, 500 MHz

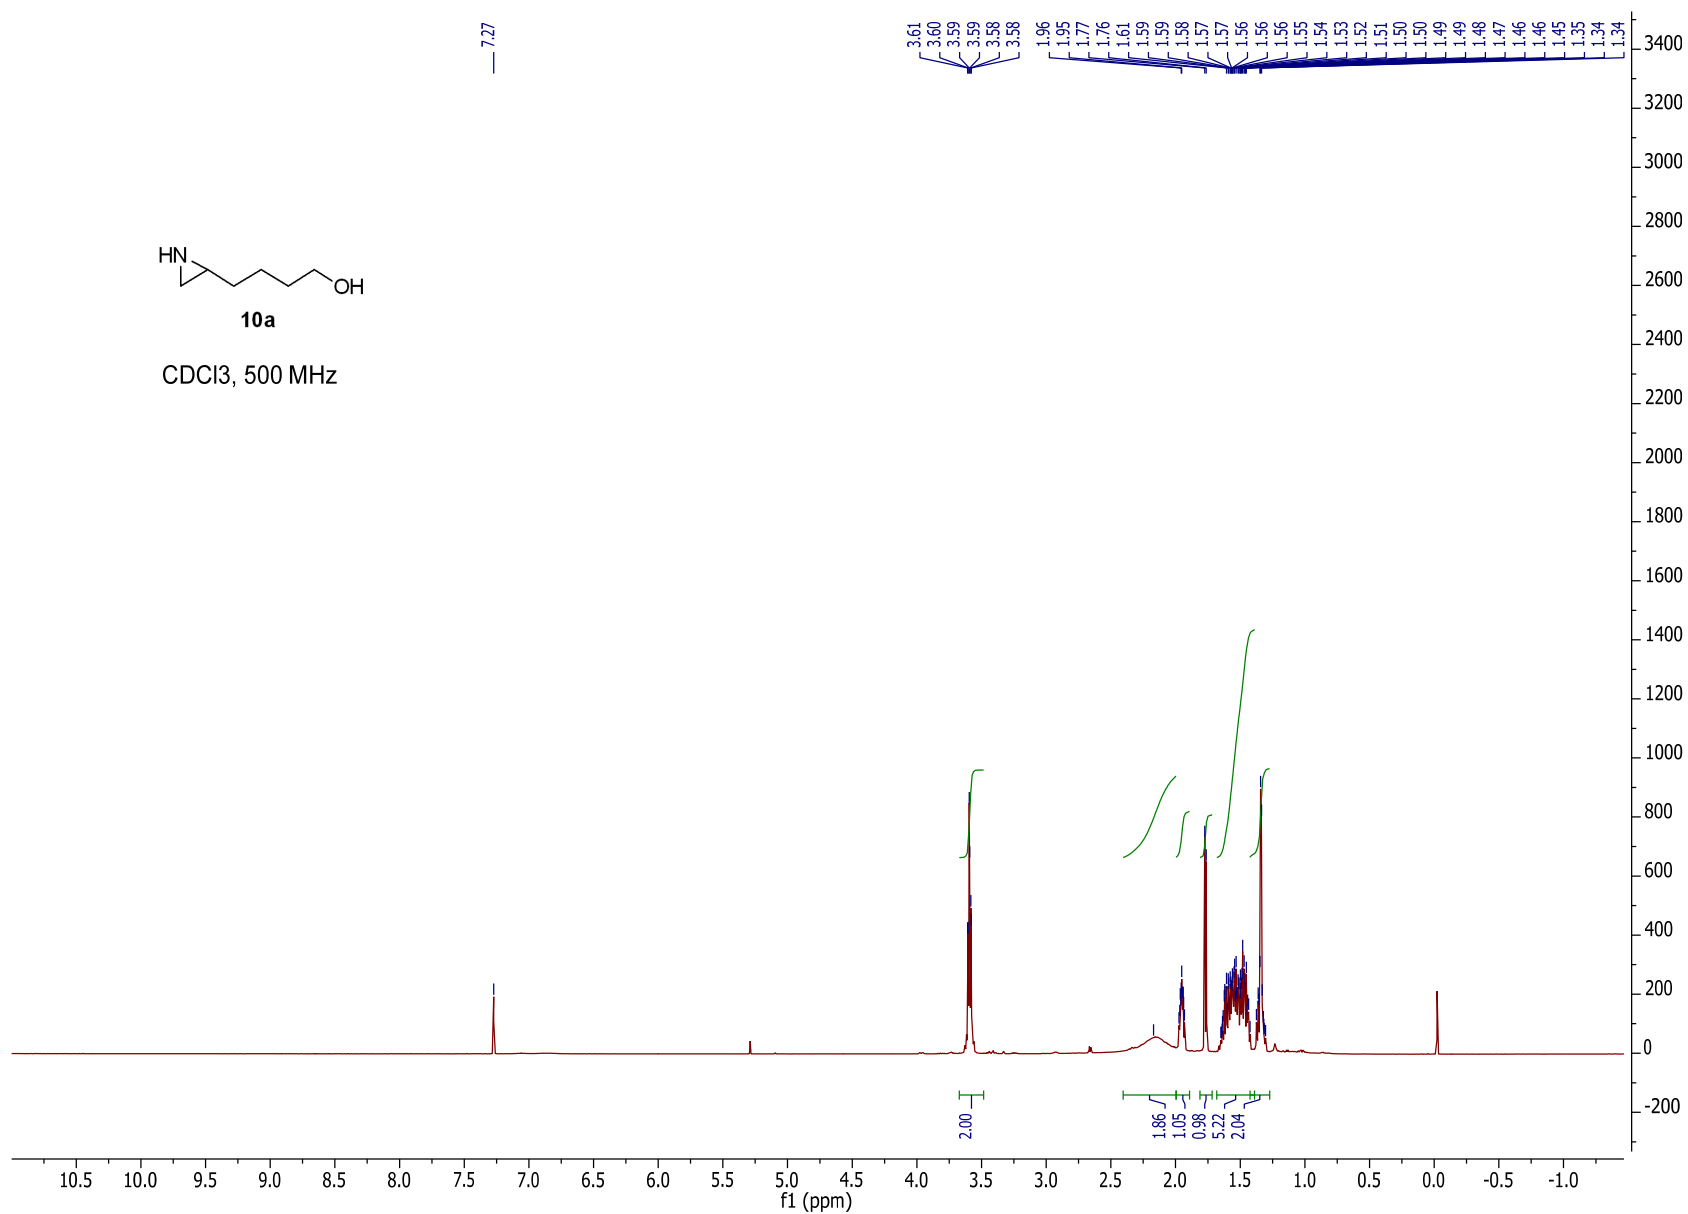



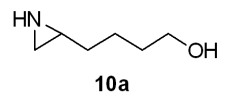

CDCl<sub>3</sub>, 500 MHz

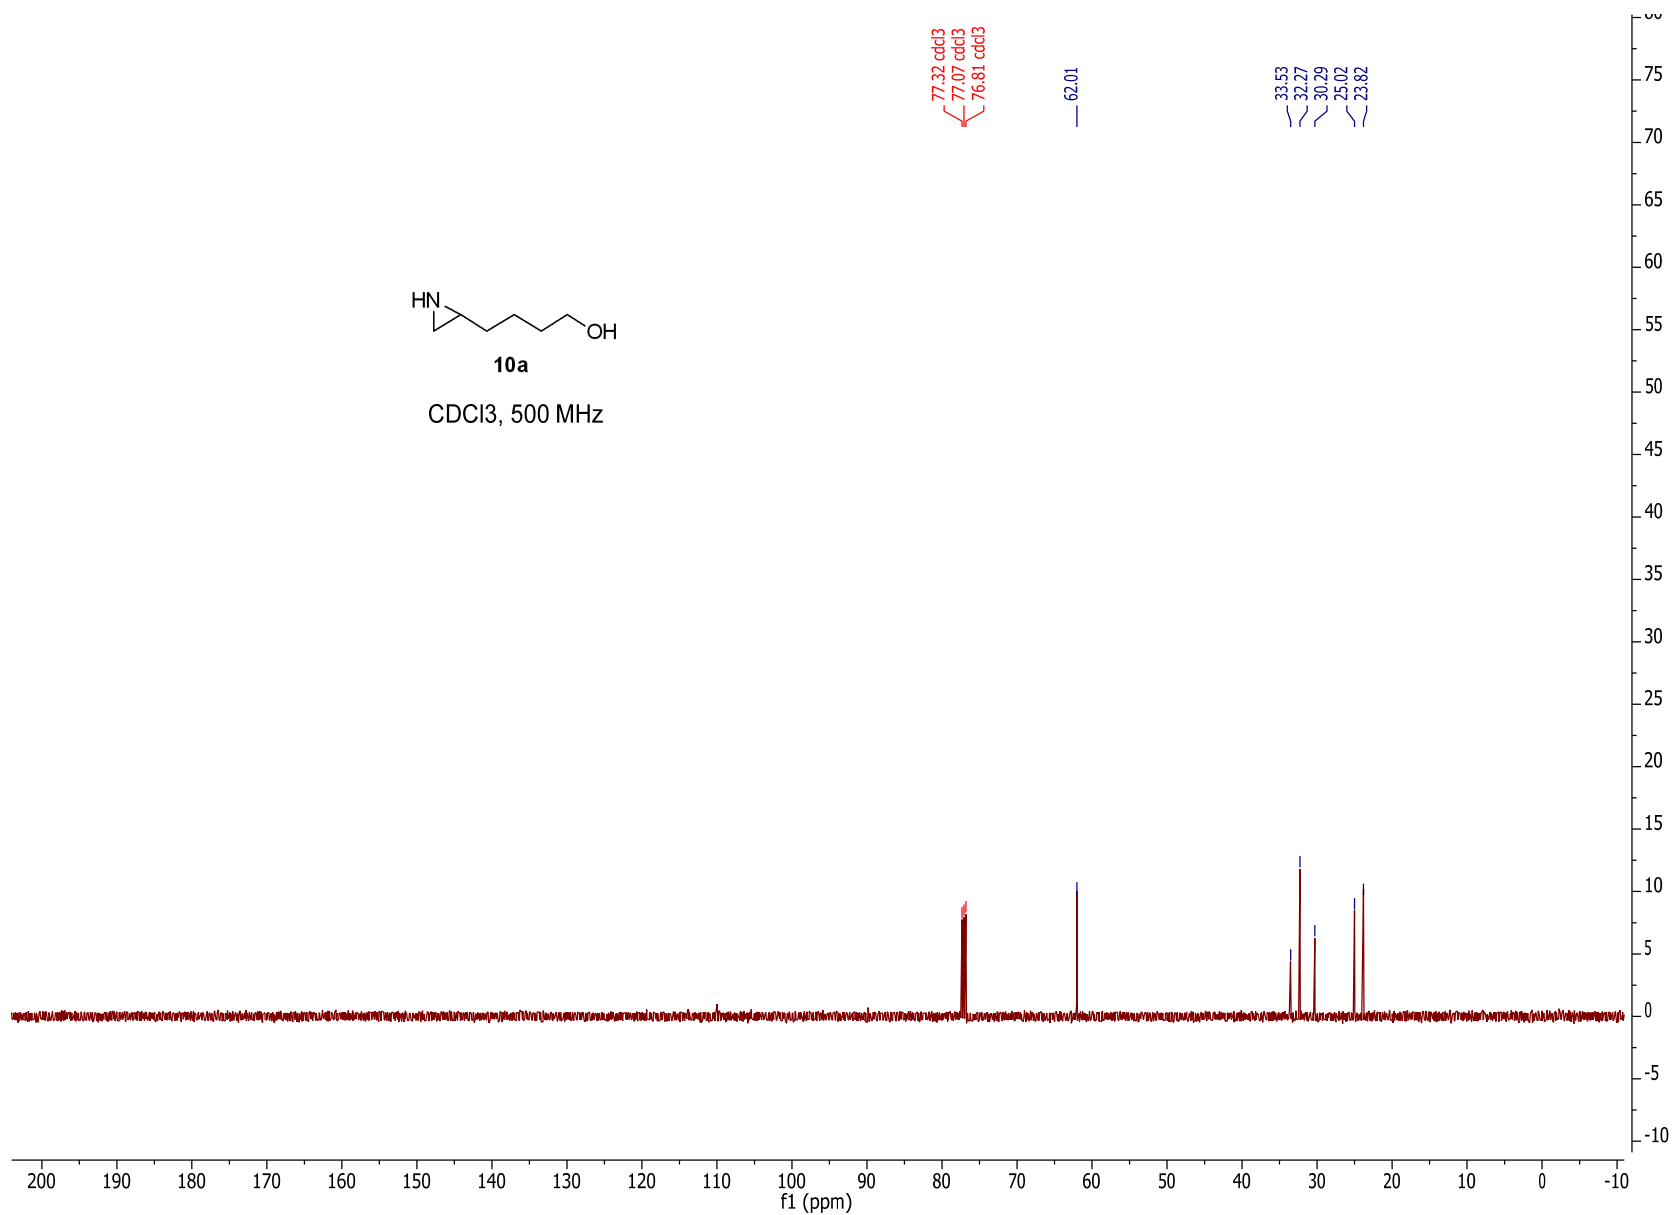

SI-113

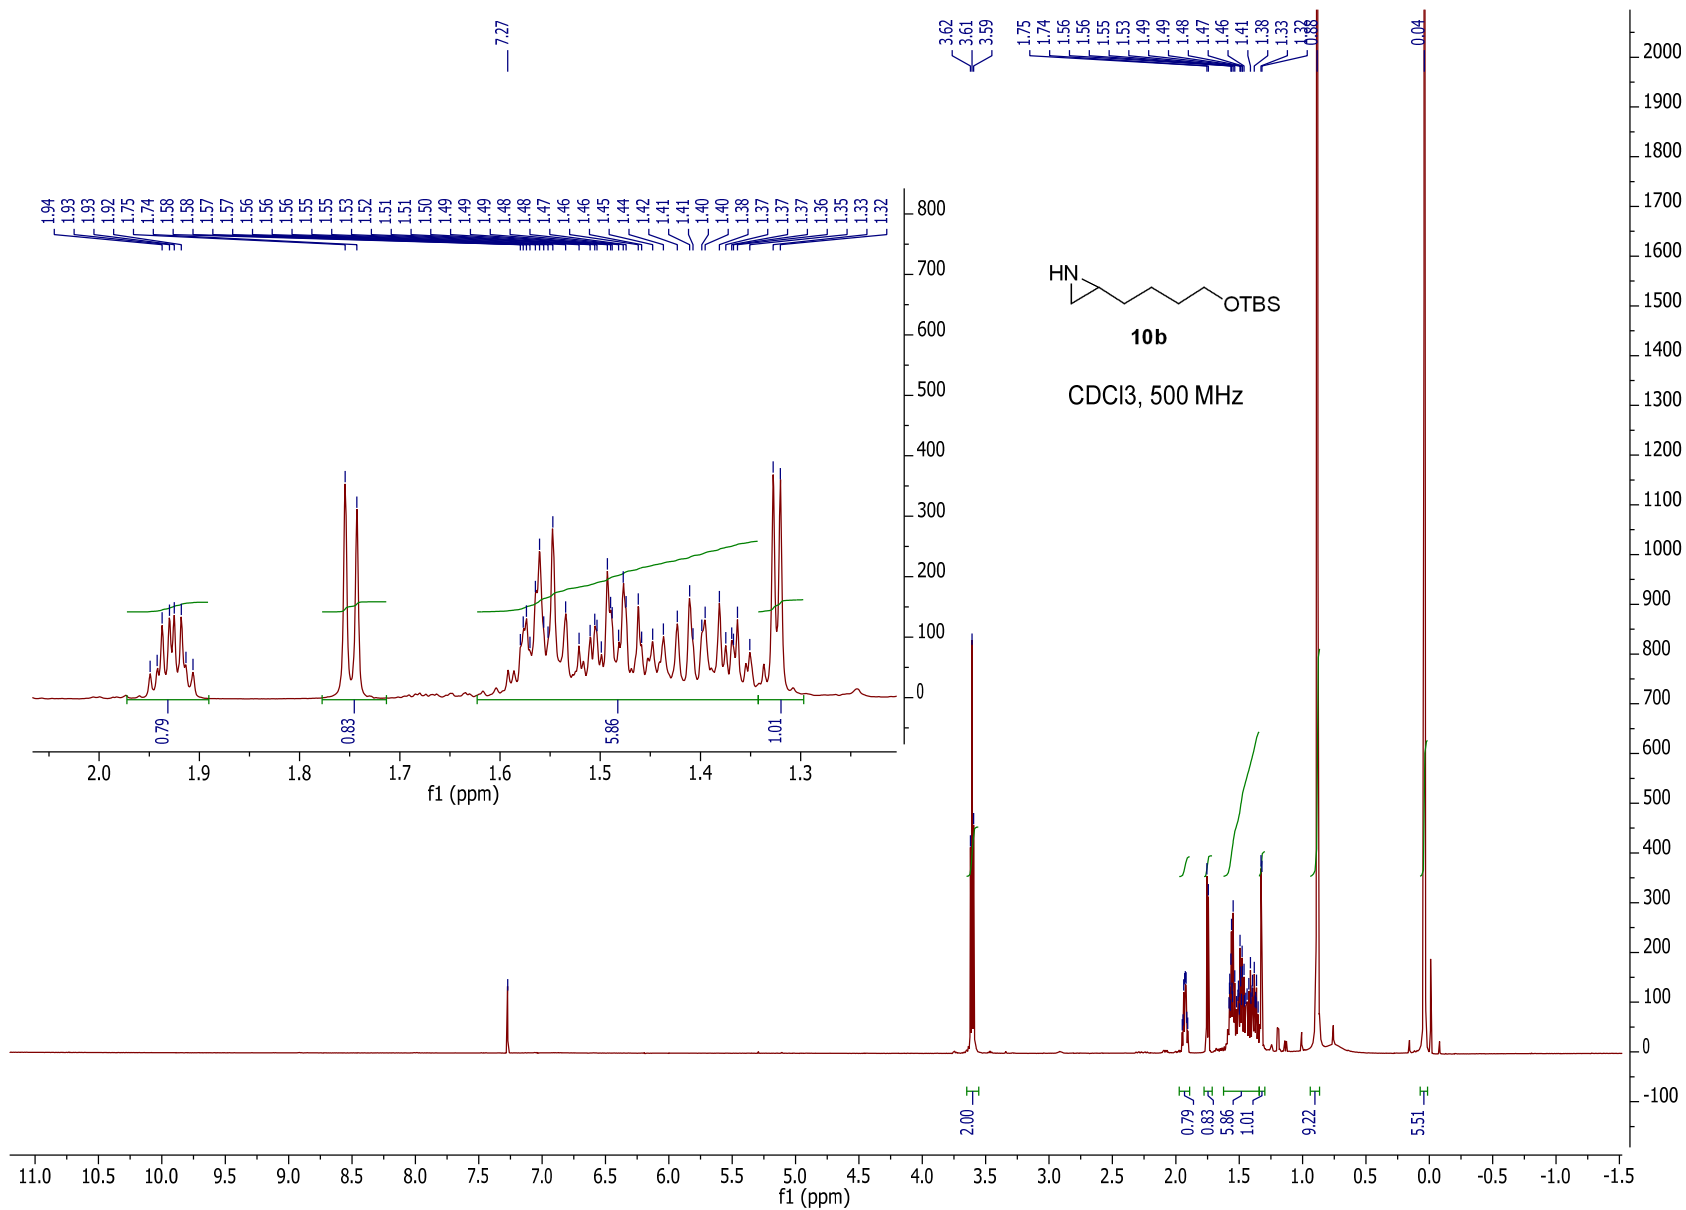

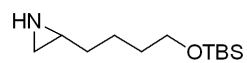

**10b**

CDCl<sub>3</sub>, 400 MHz

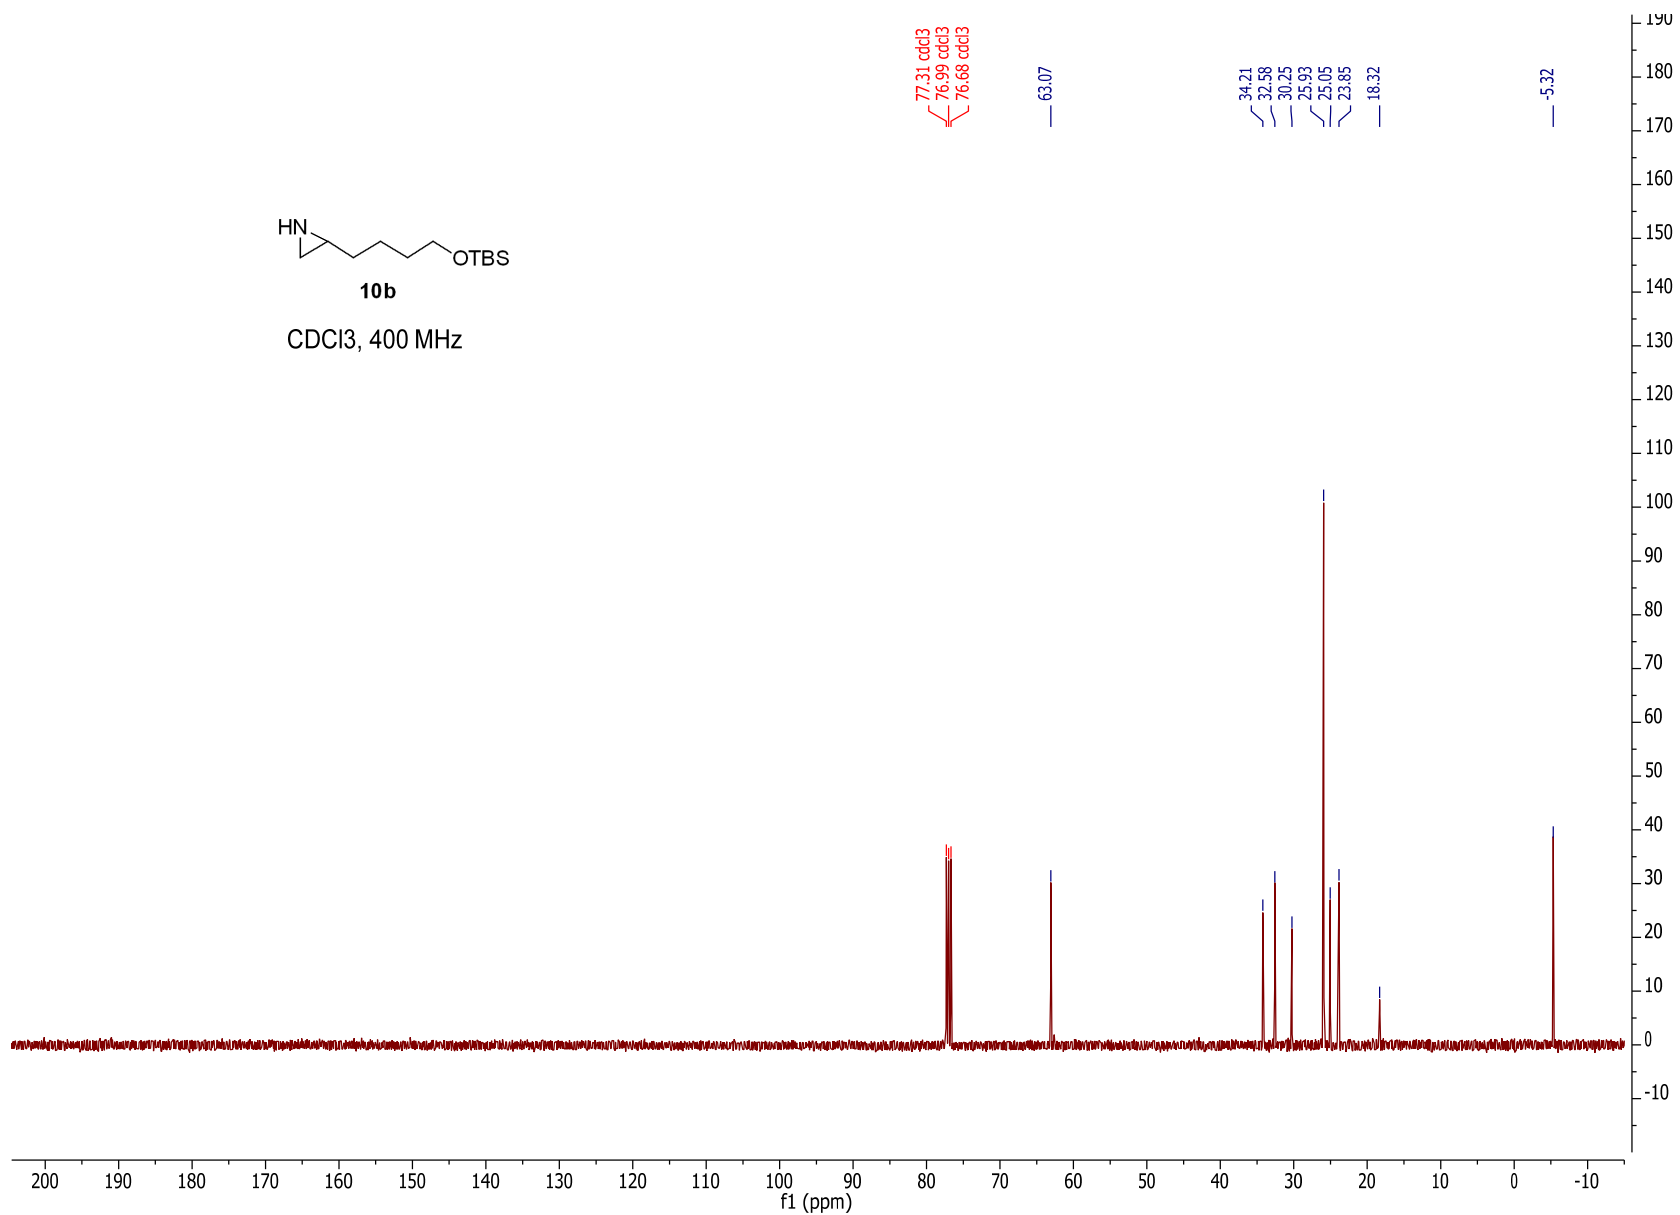

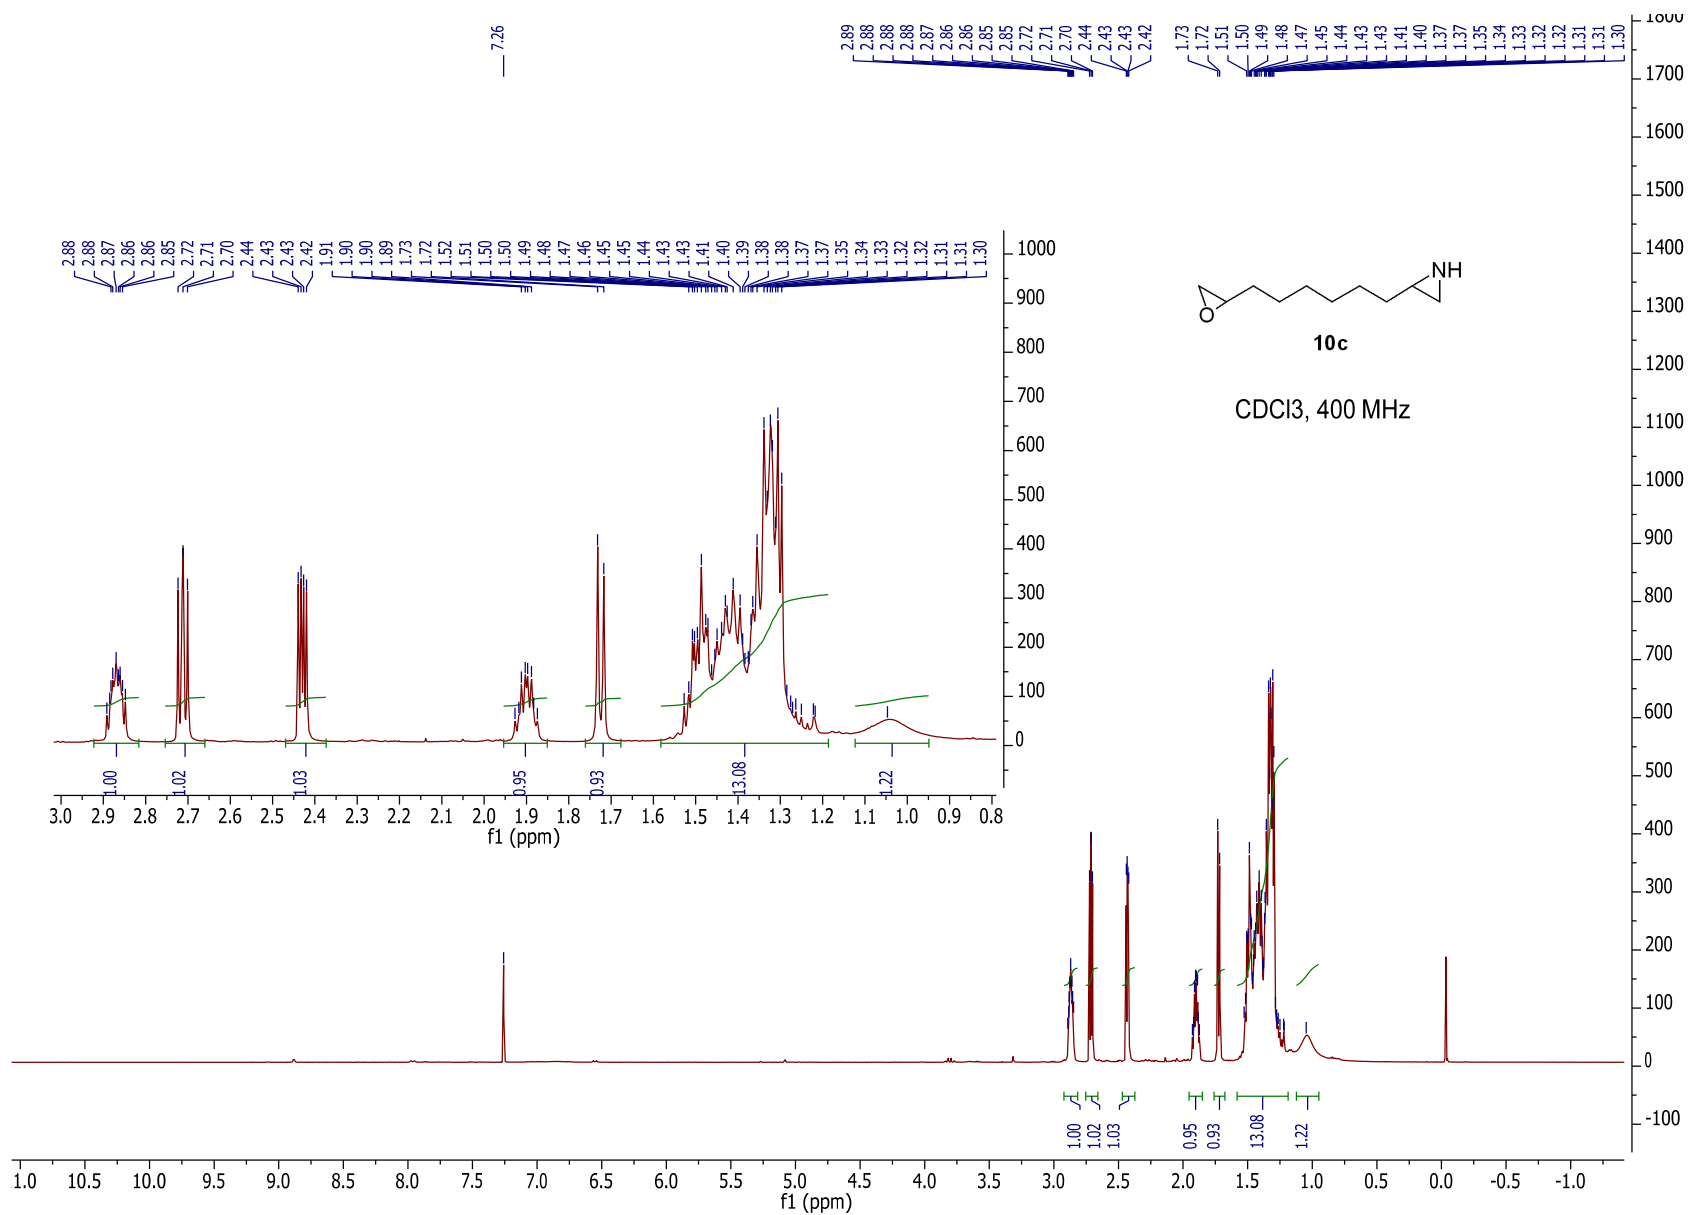

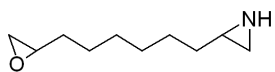

10c

CDCl<sub>3</sub>, 400 MHz

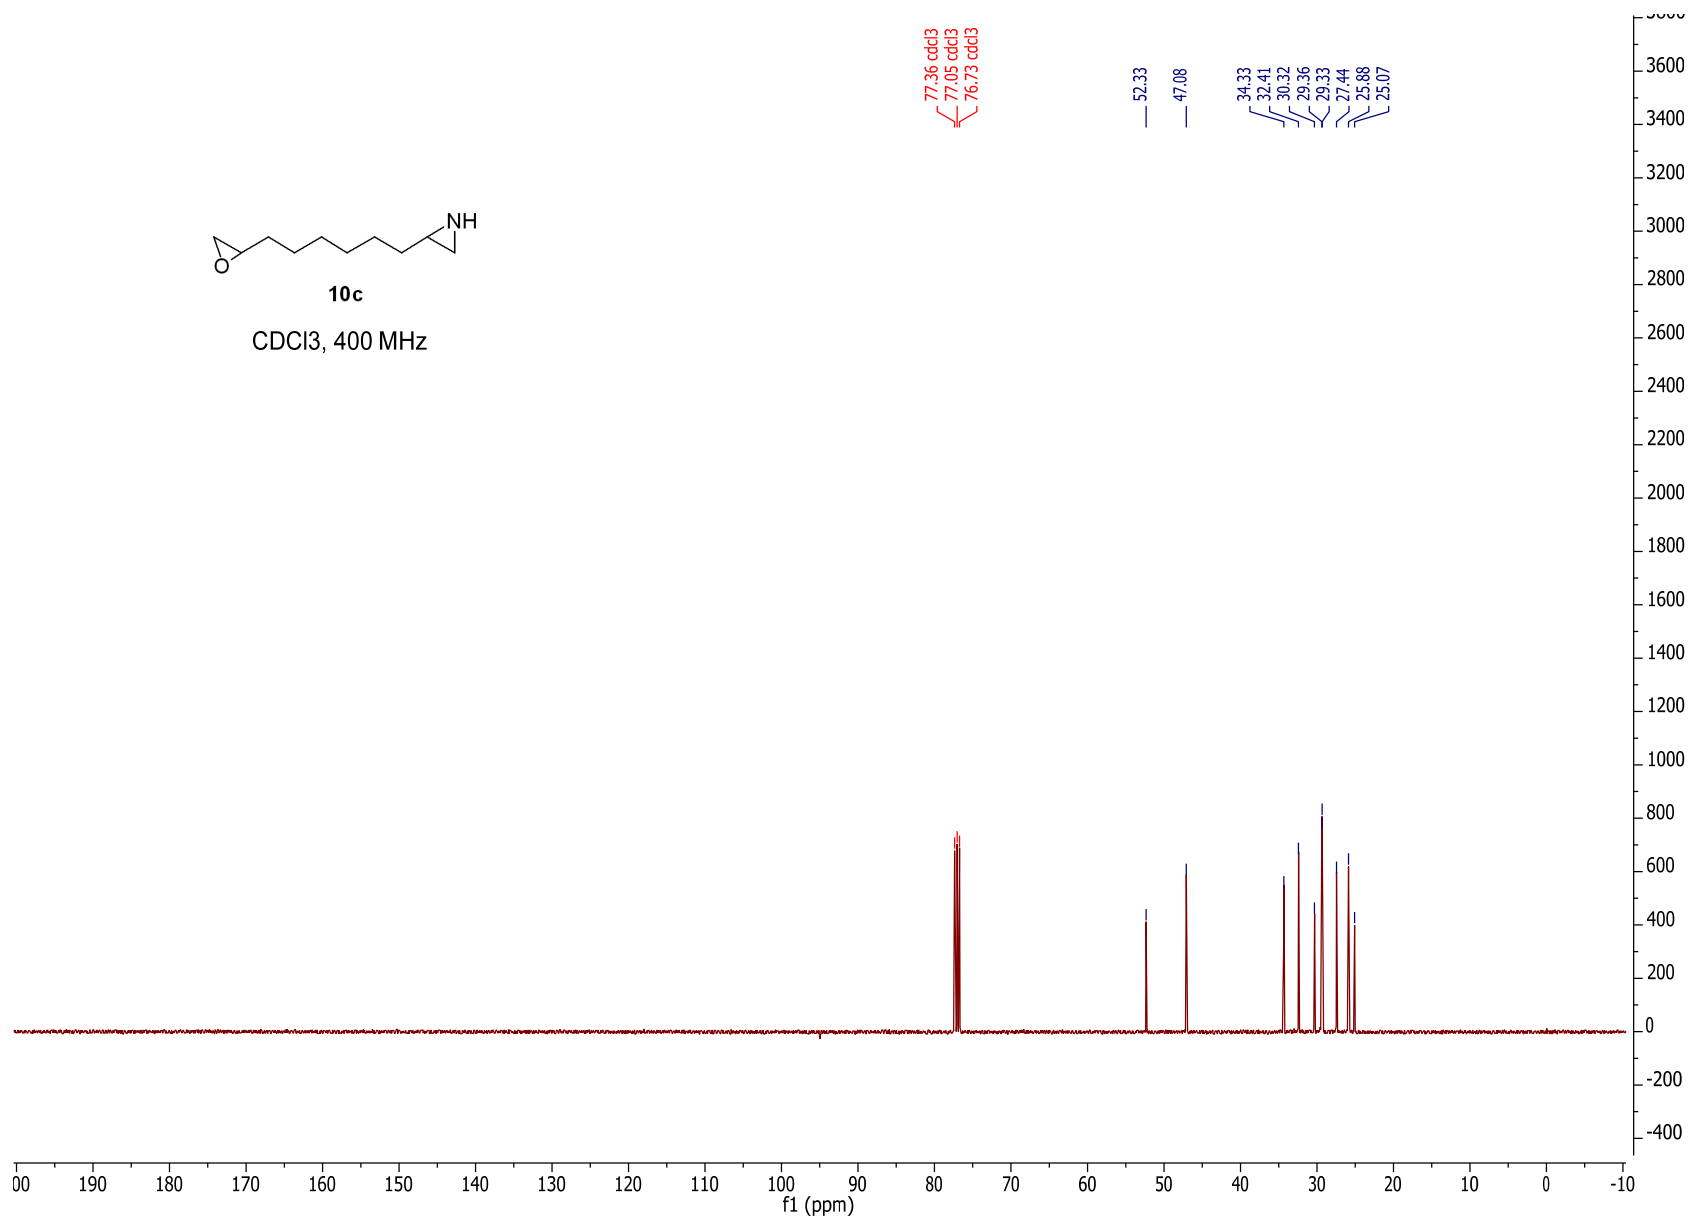

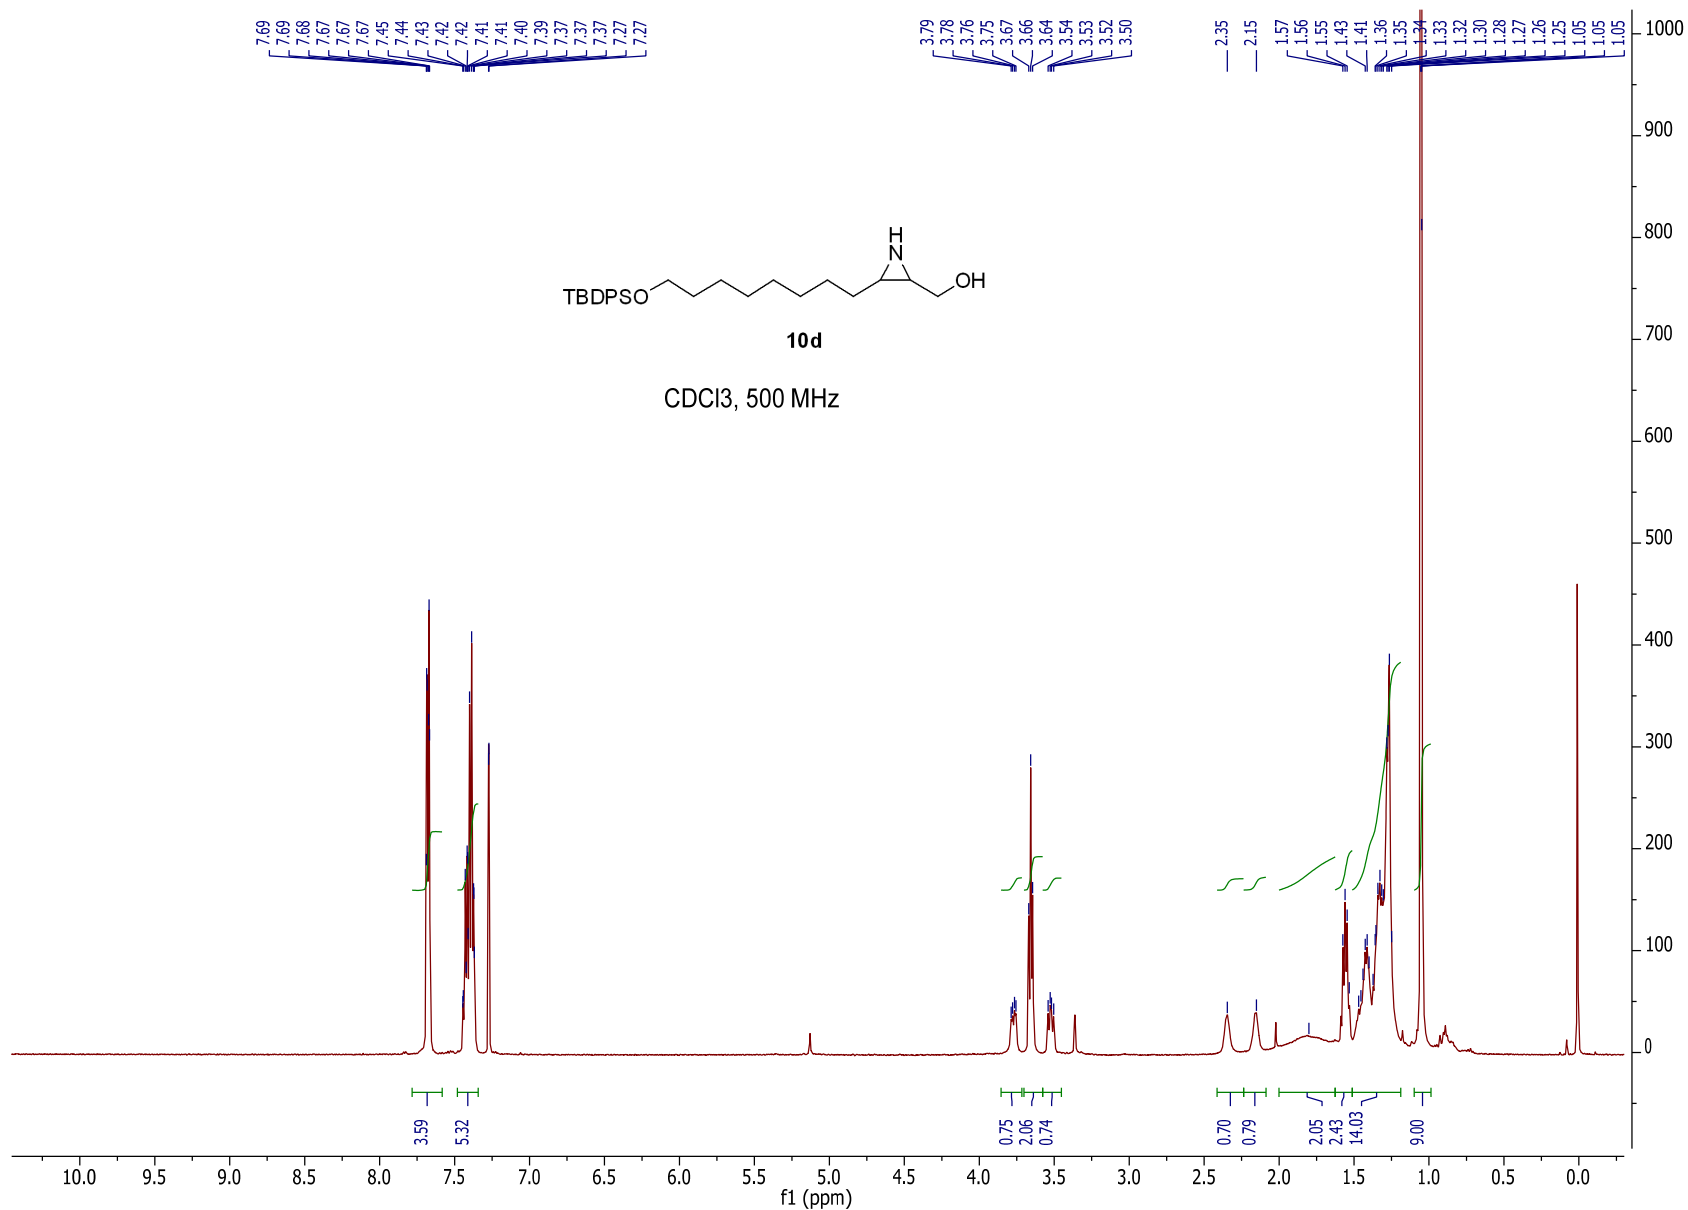

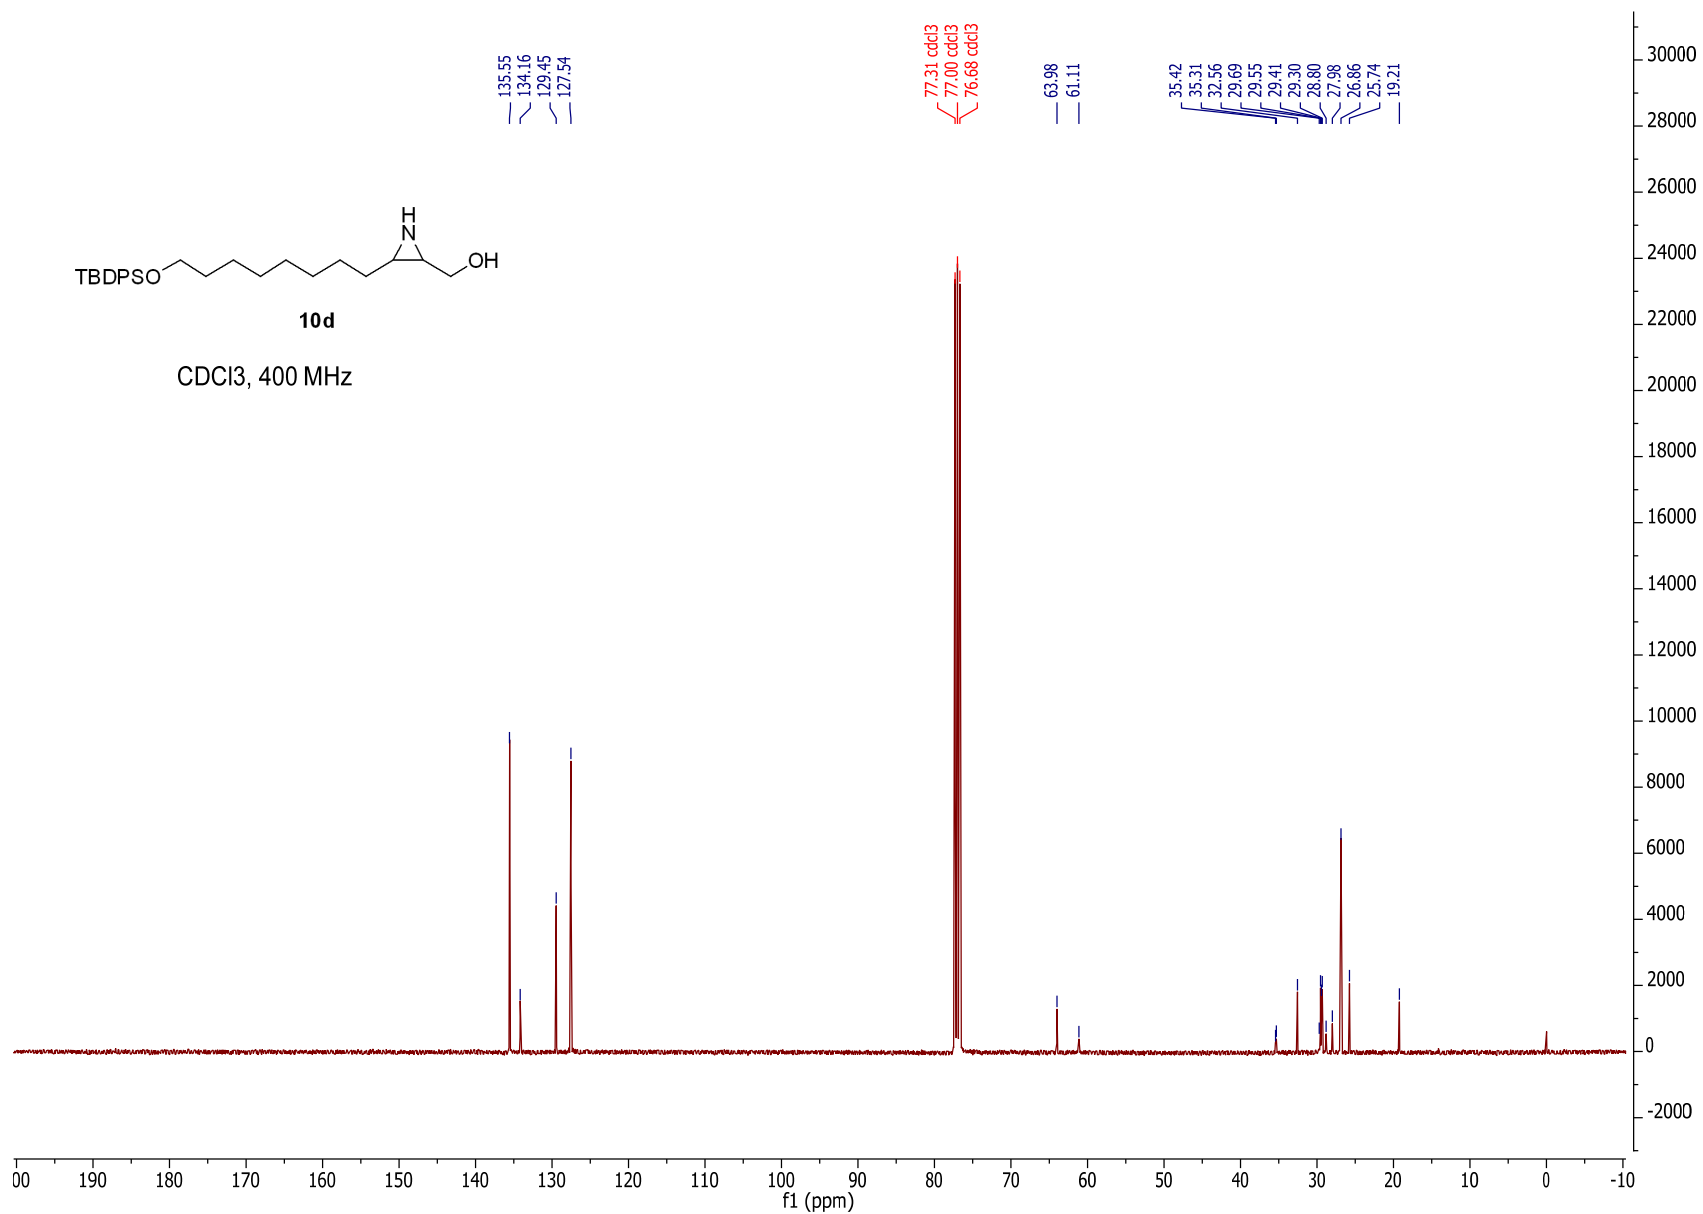

SI-119

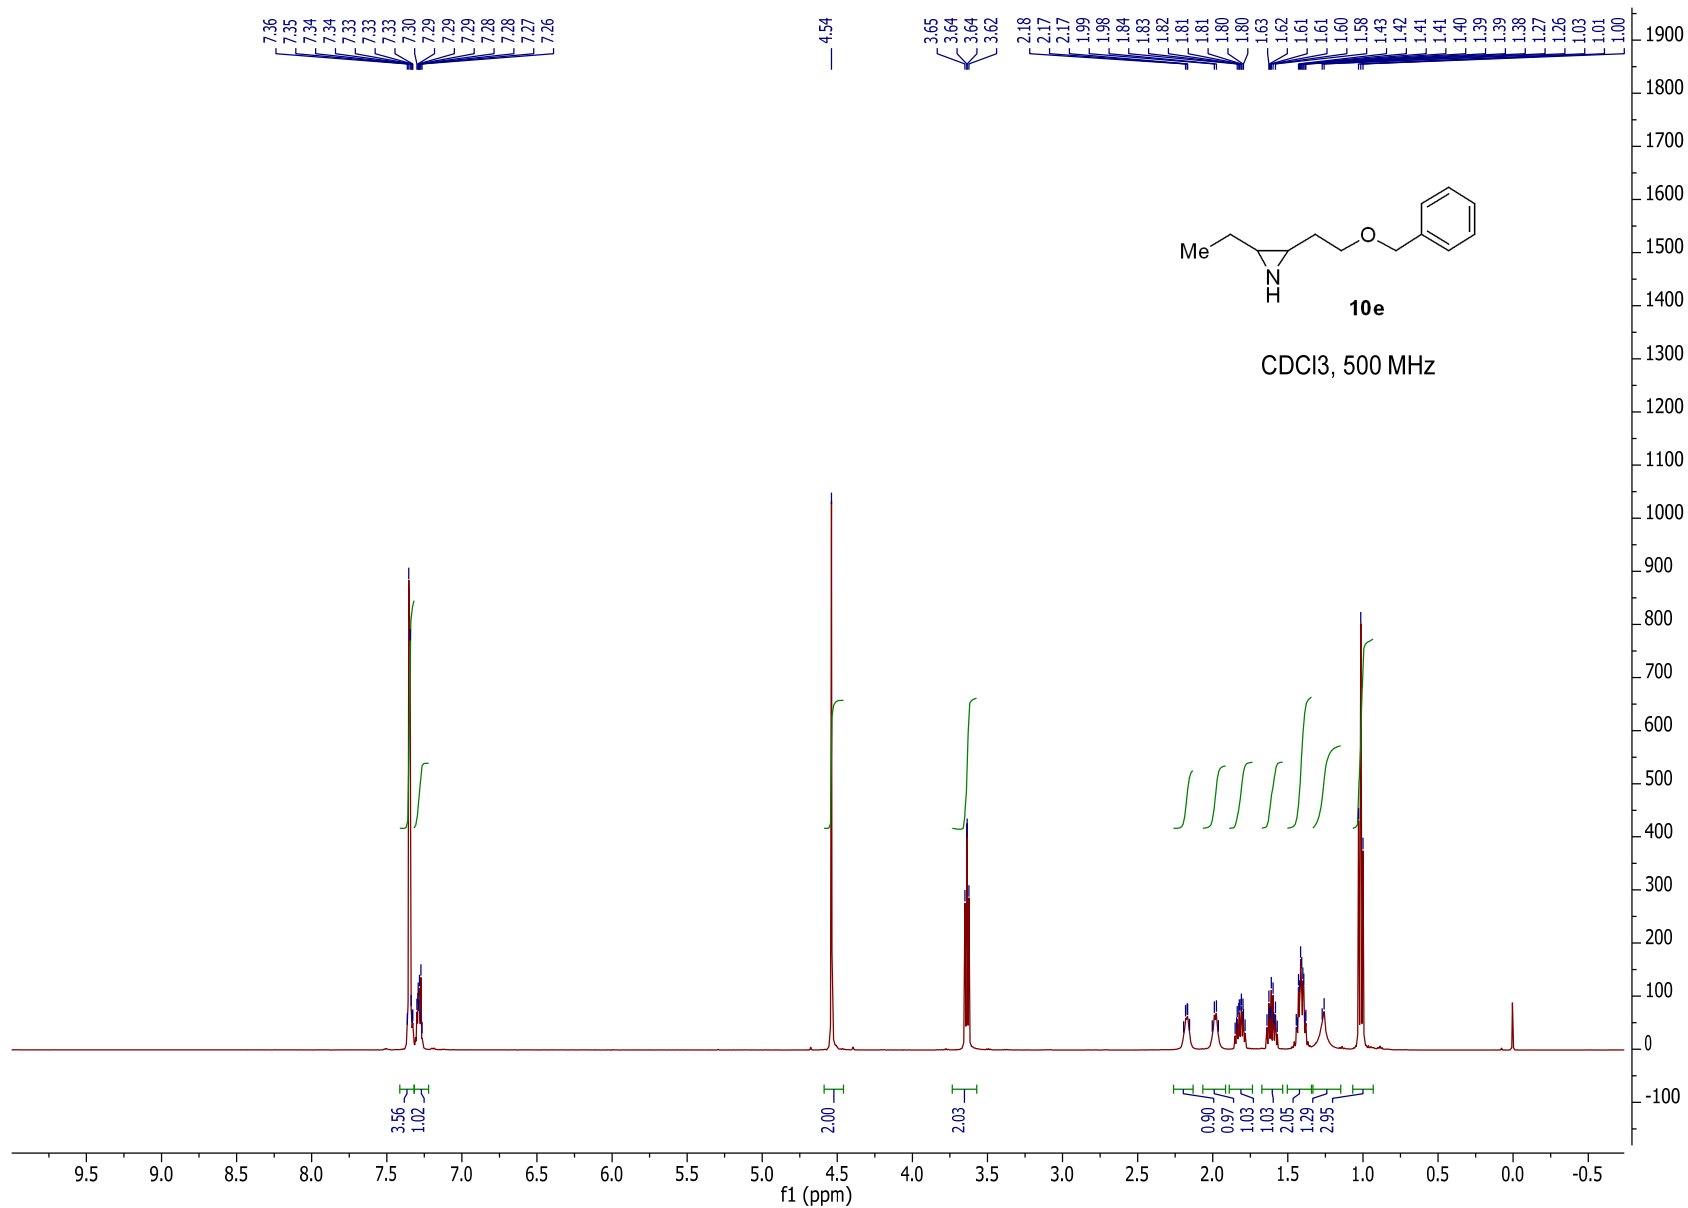

SI-120



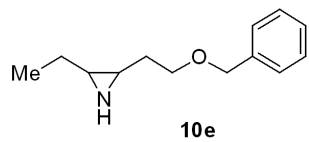

CDCl<sub>3</sub>, 500 MHz

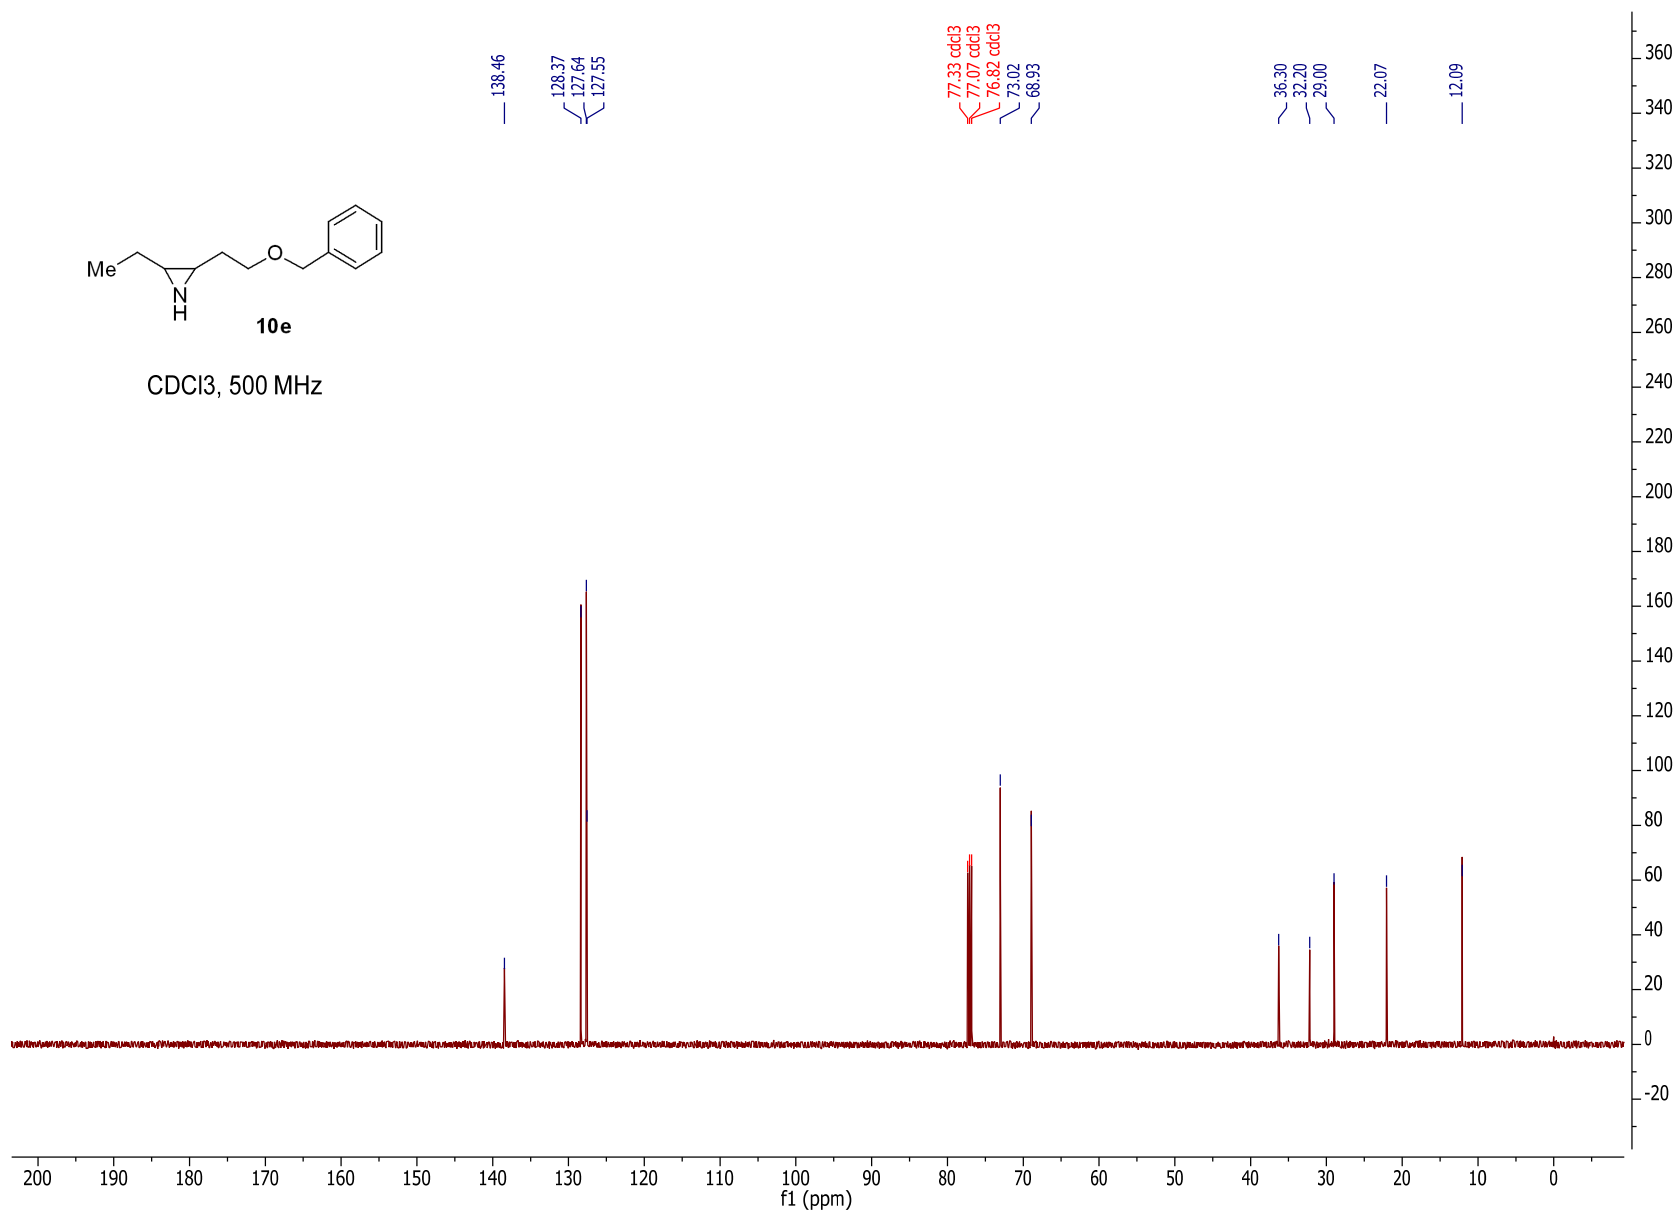

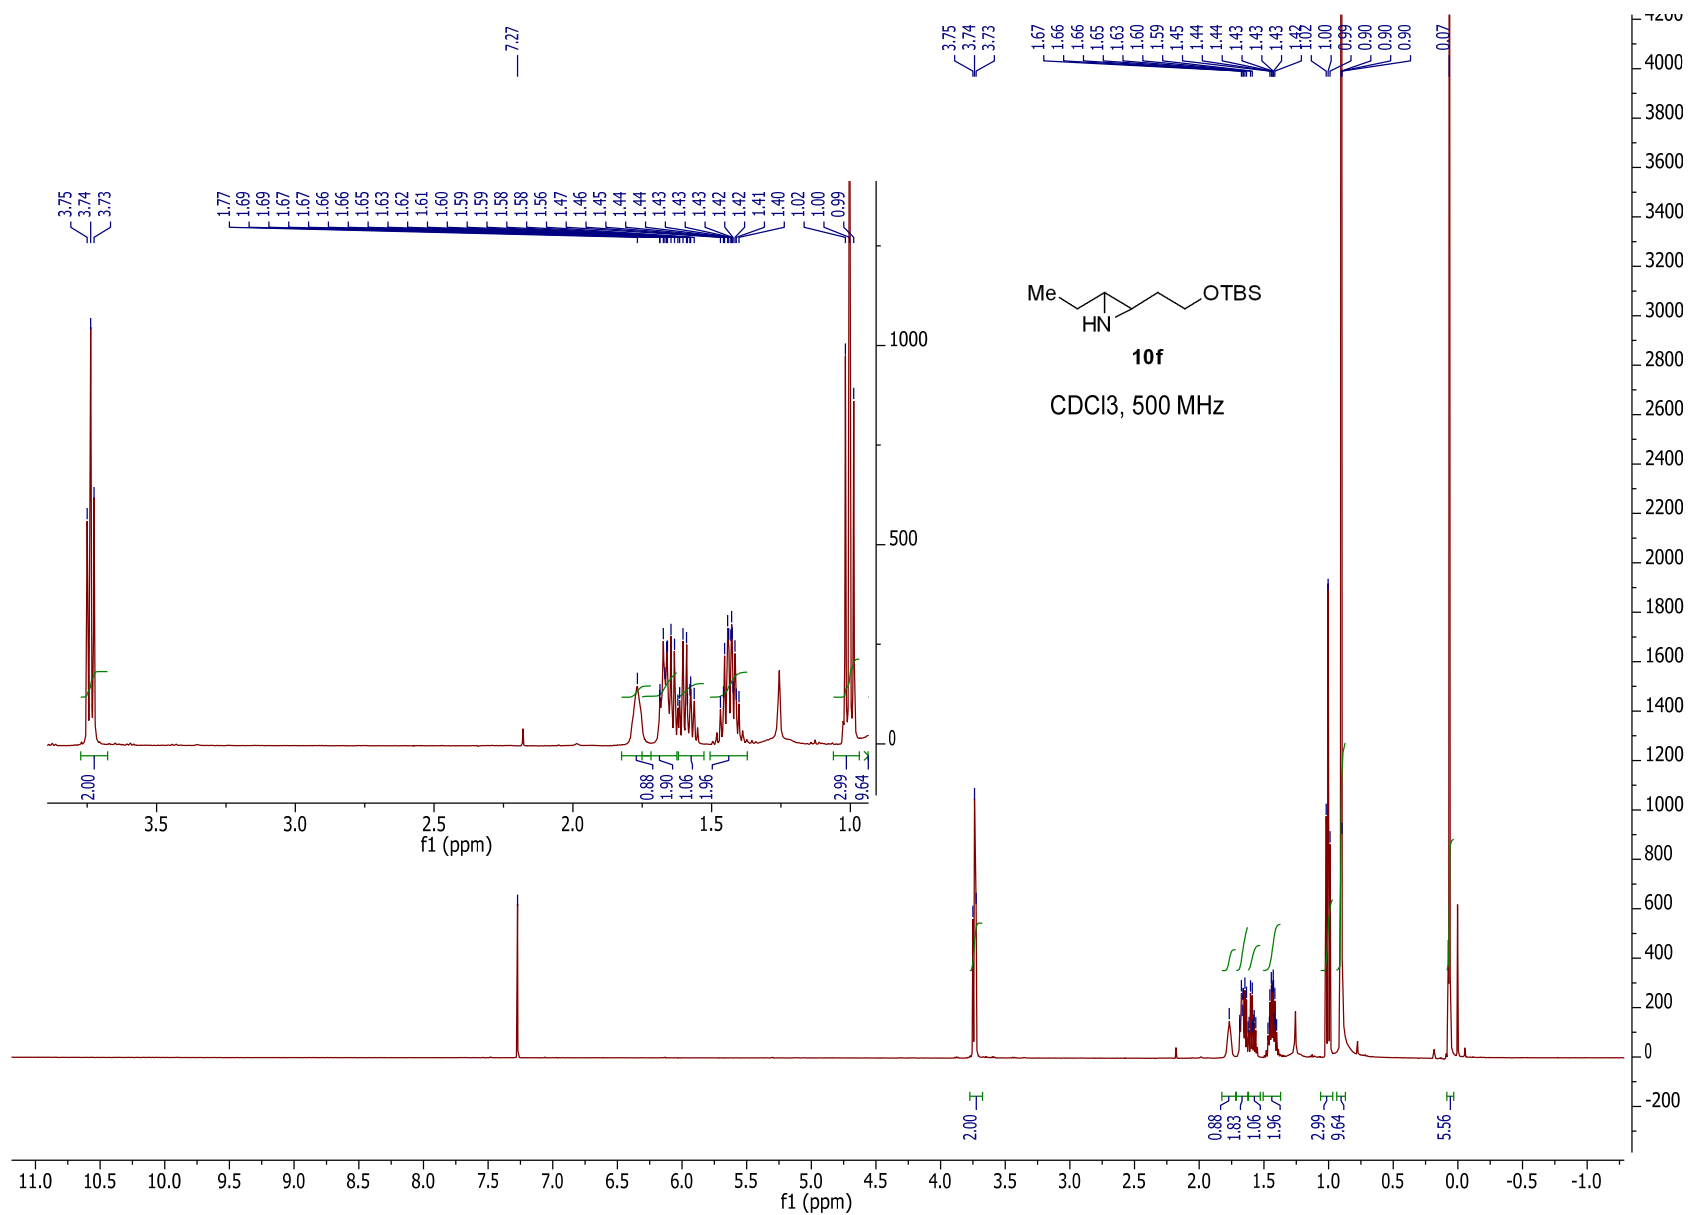

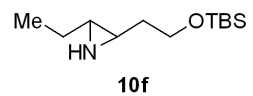

CDCl<sub>3</sub>, 500 MHz

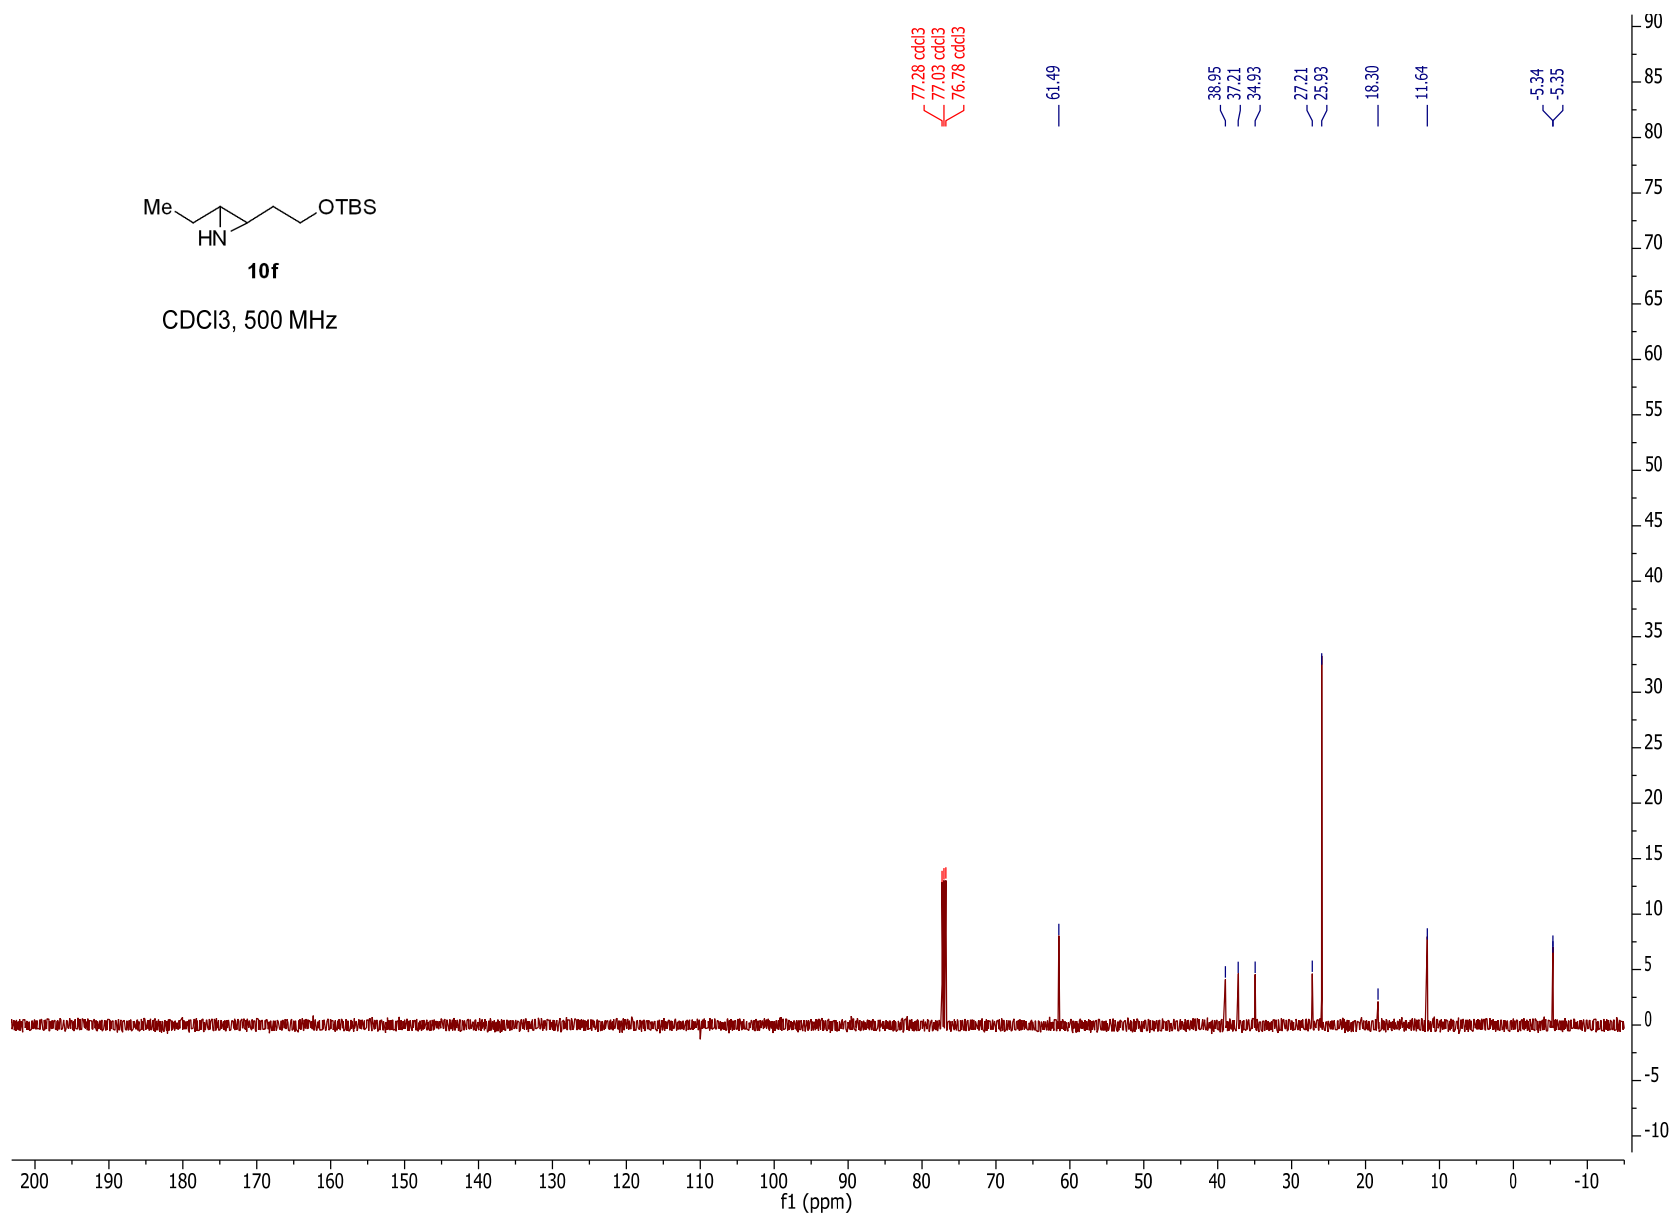

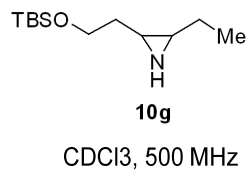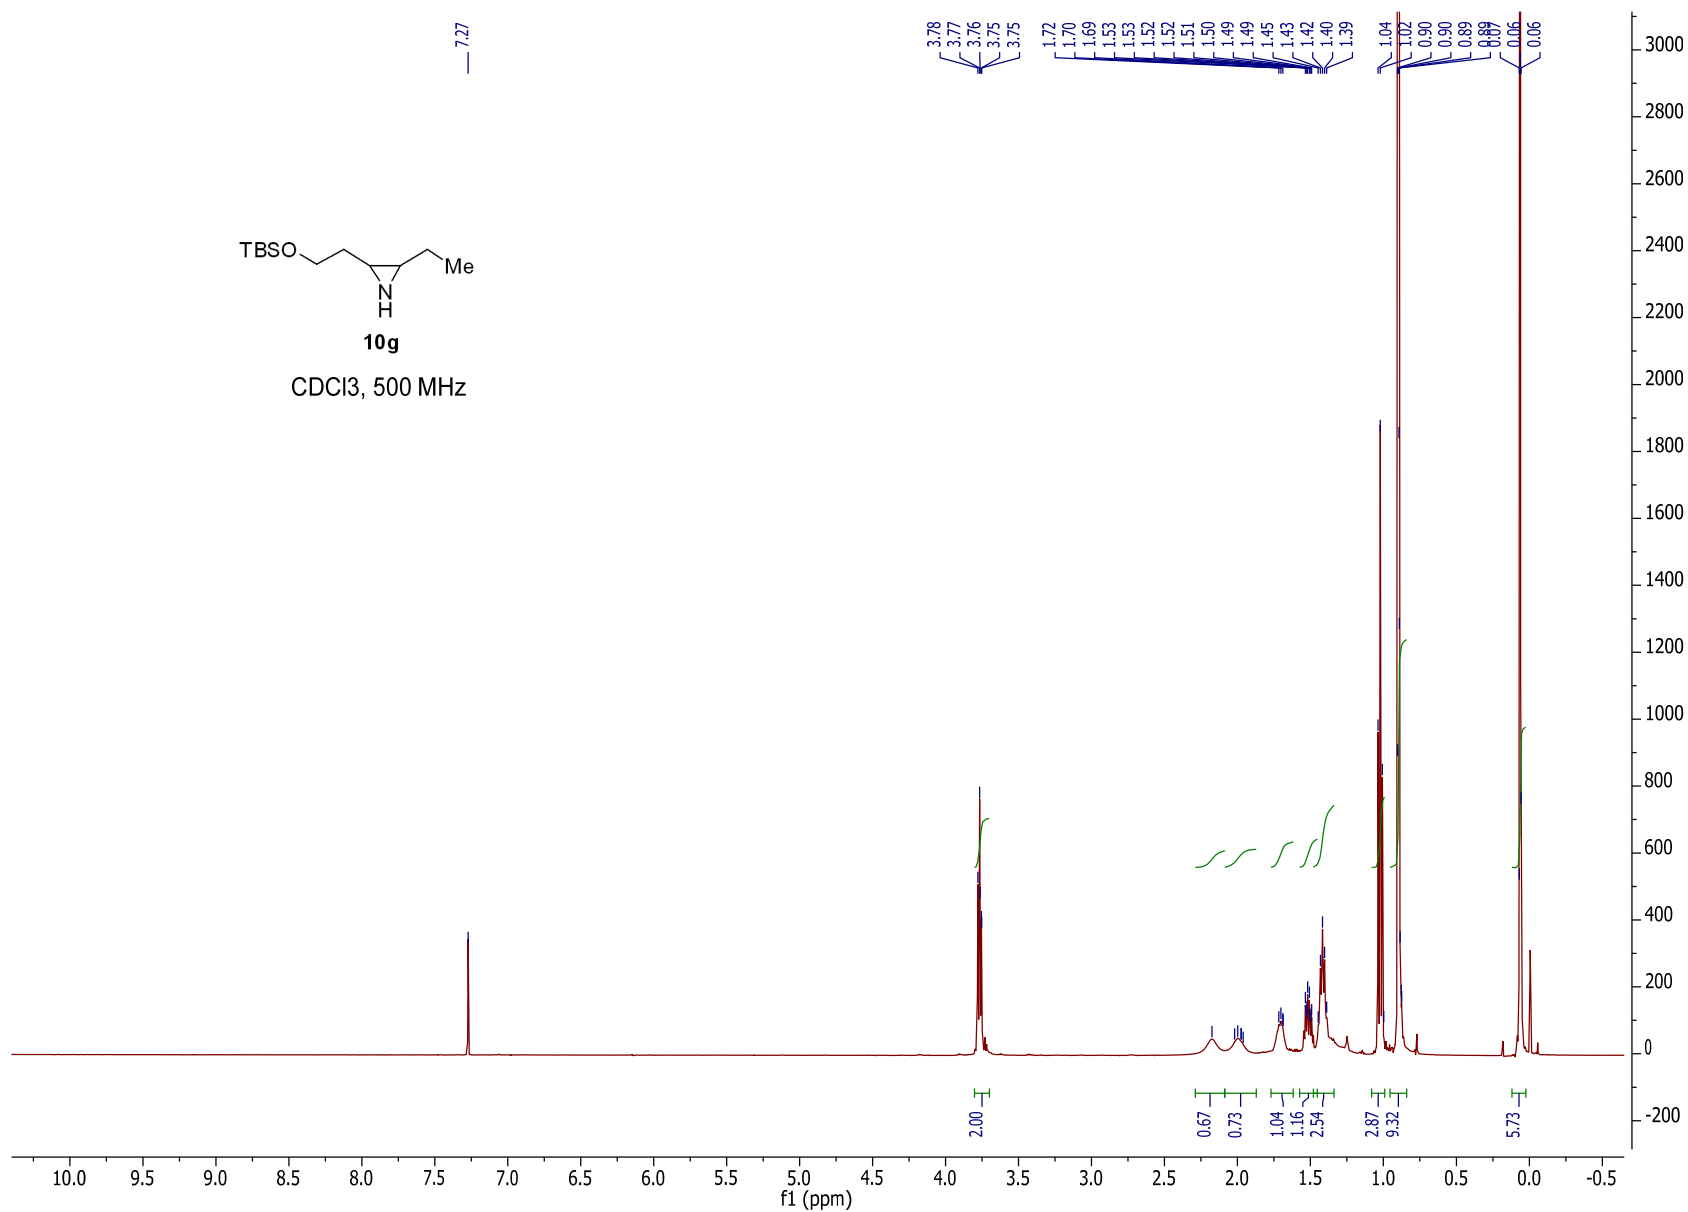

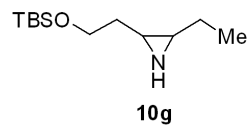

CDCl<sub>3</sub>, 500 MHz

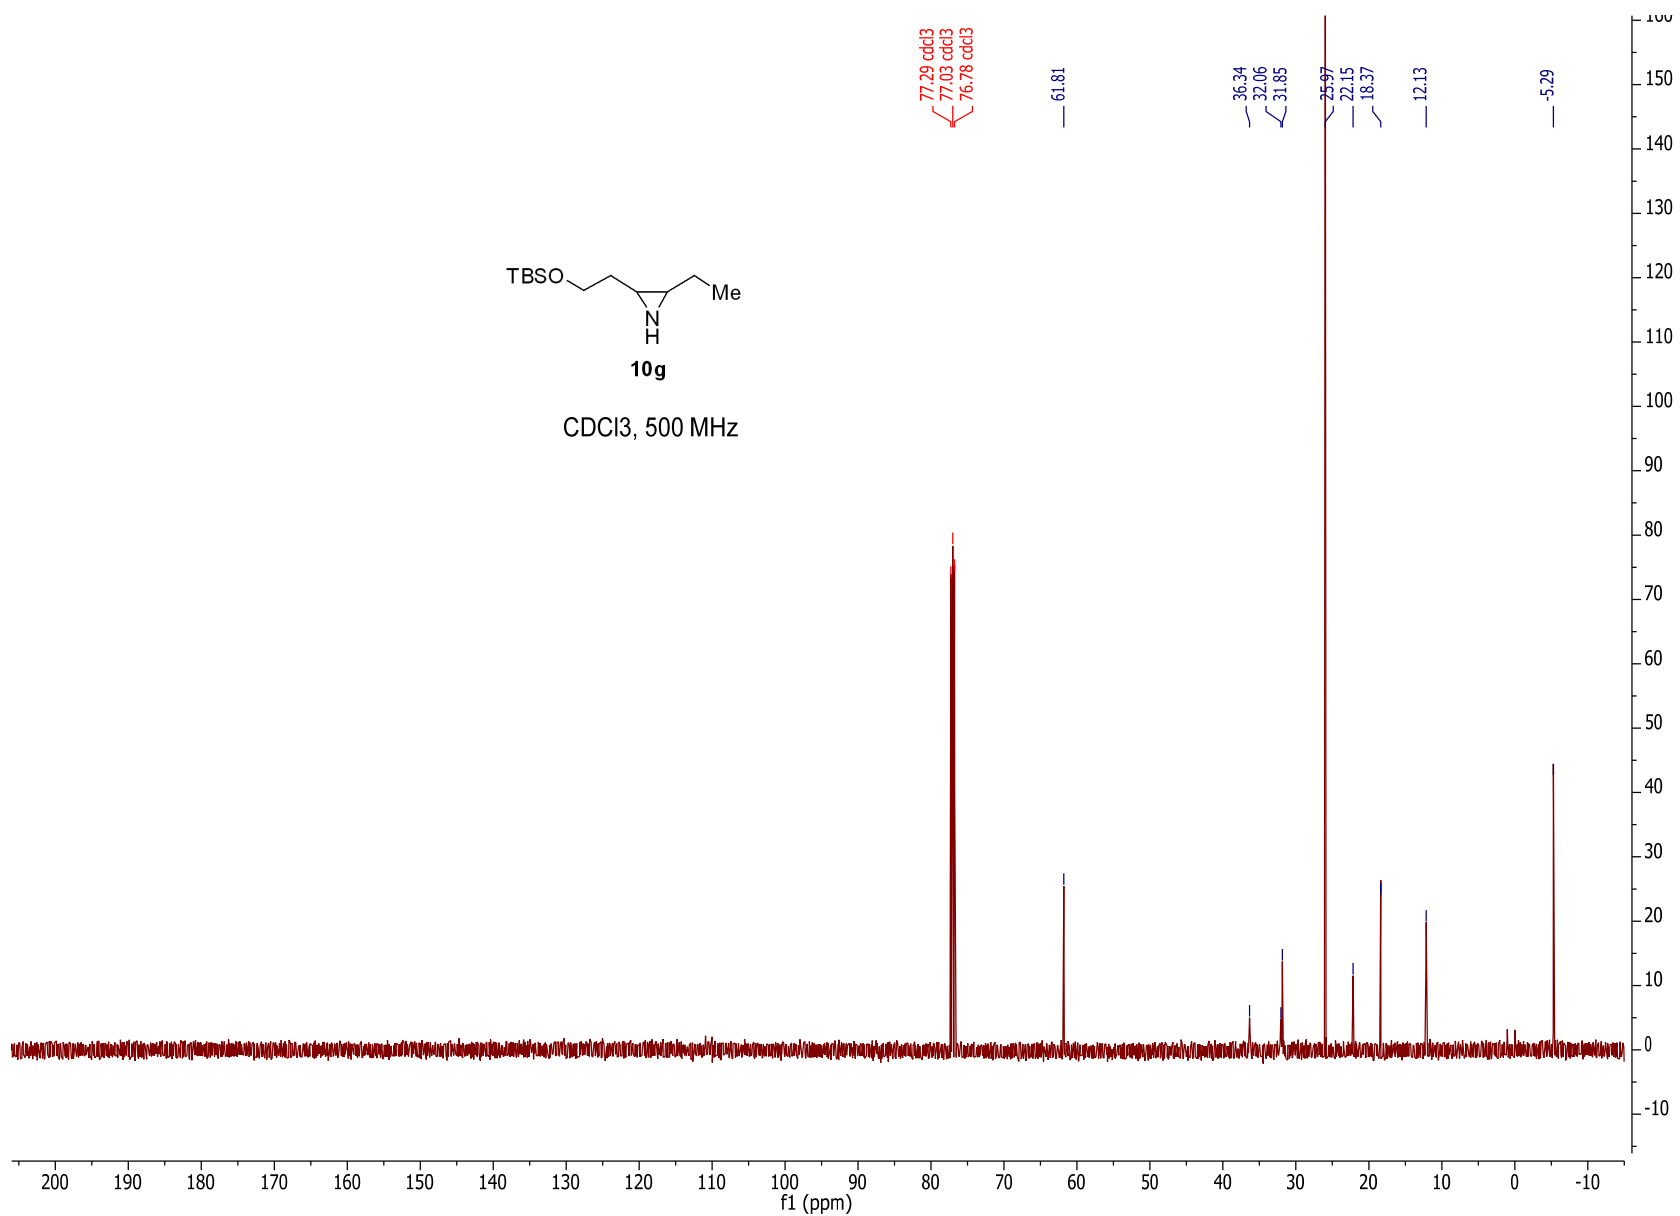

SI-125

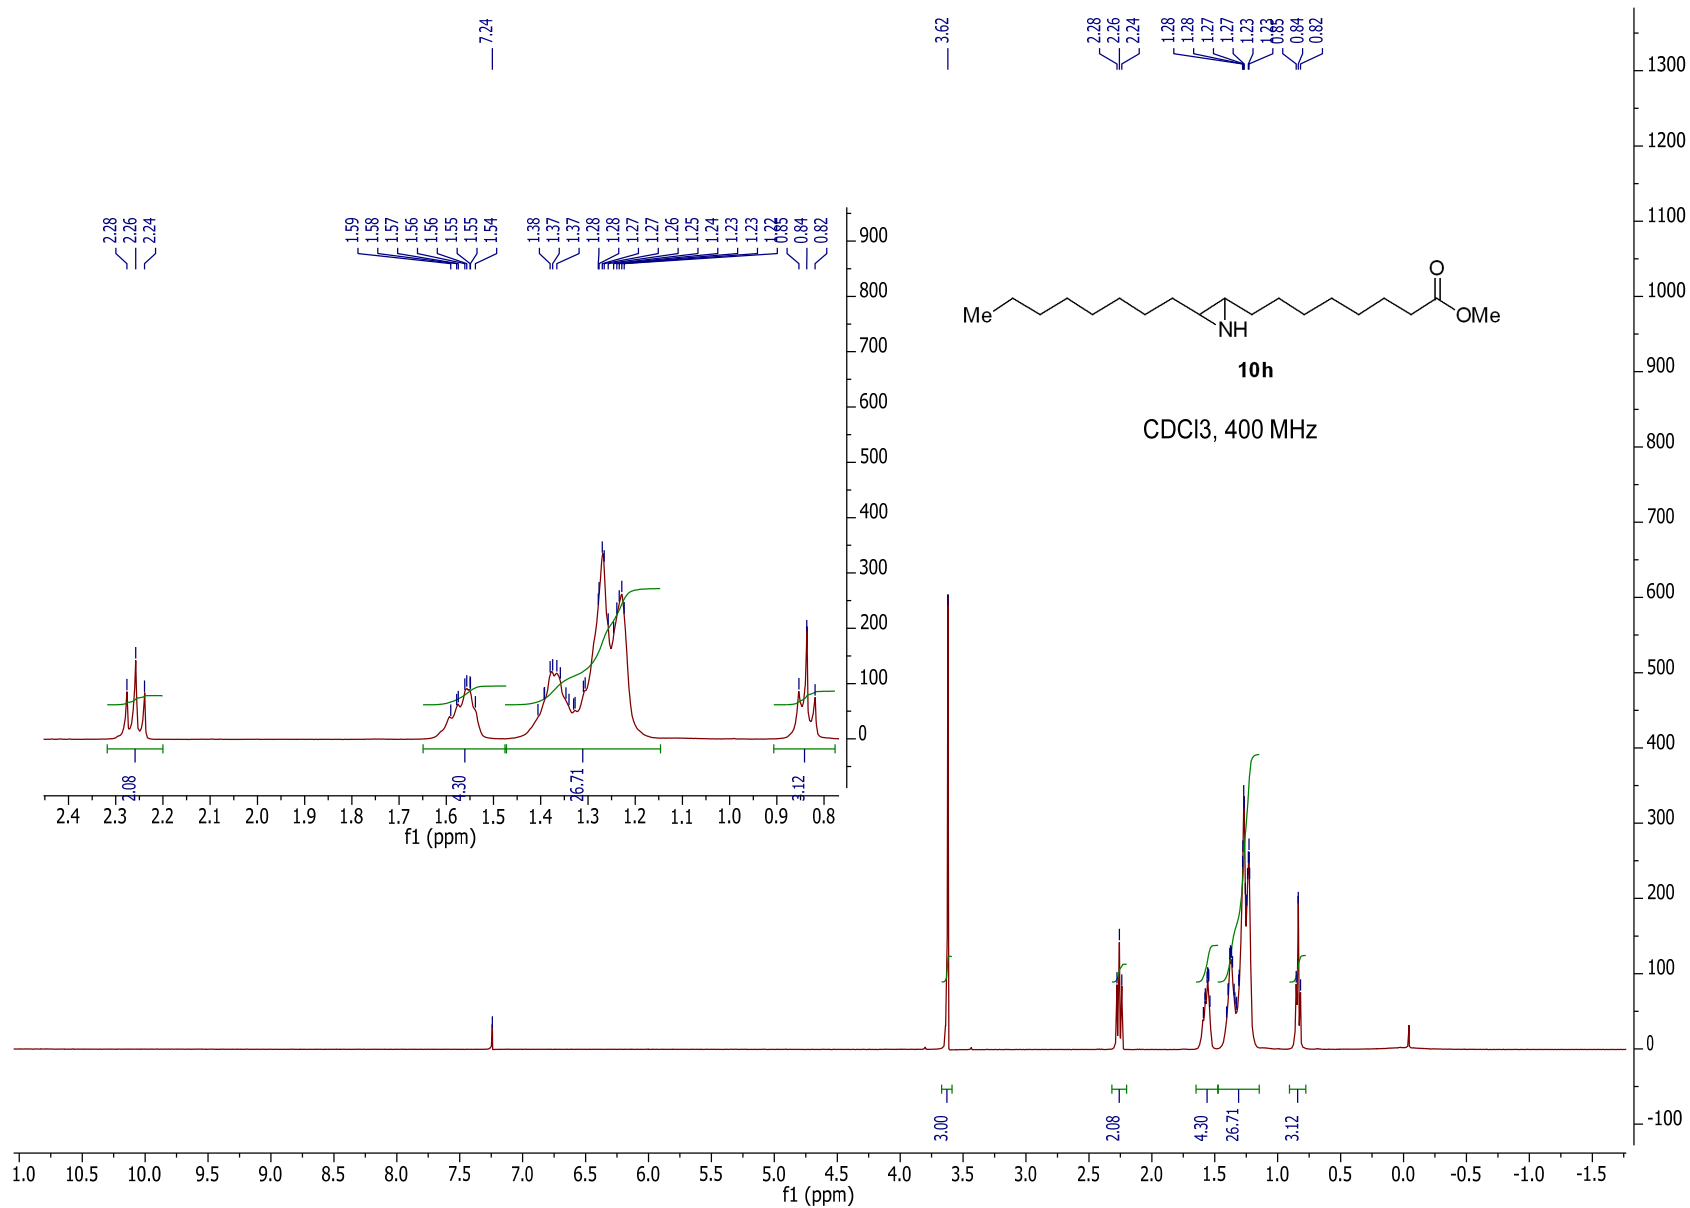

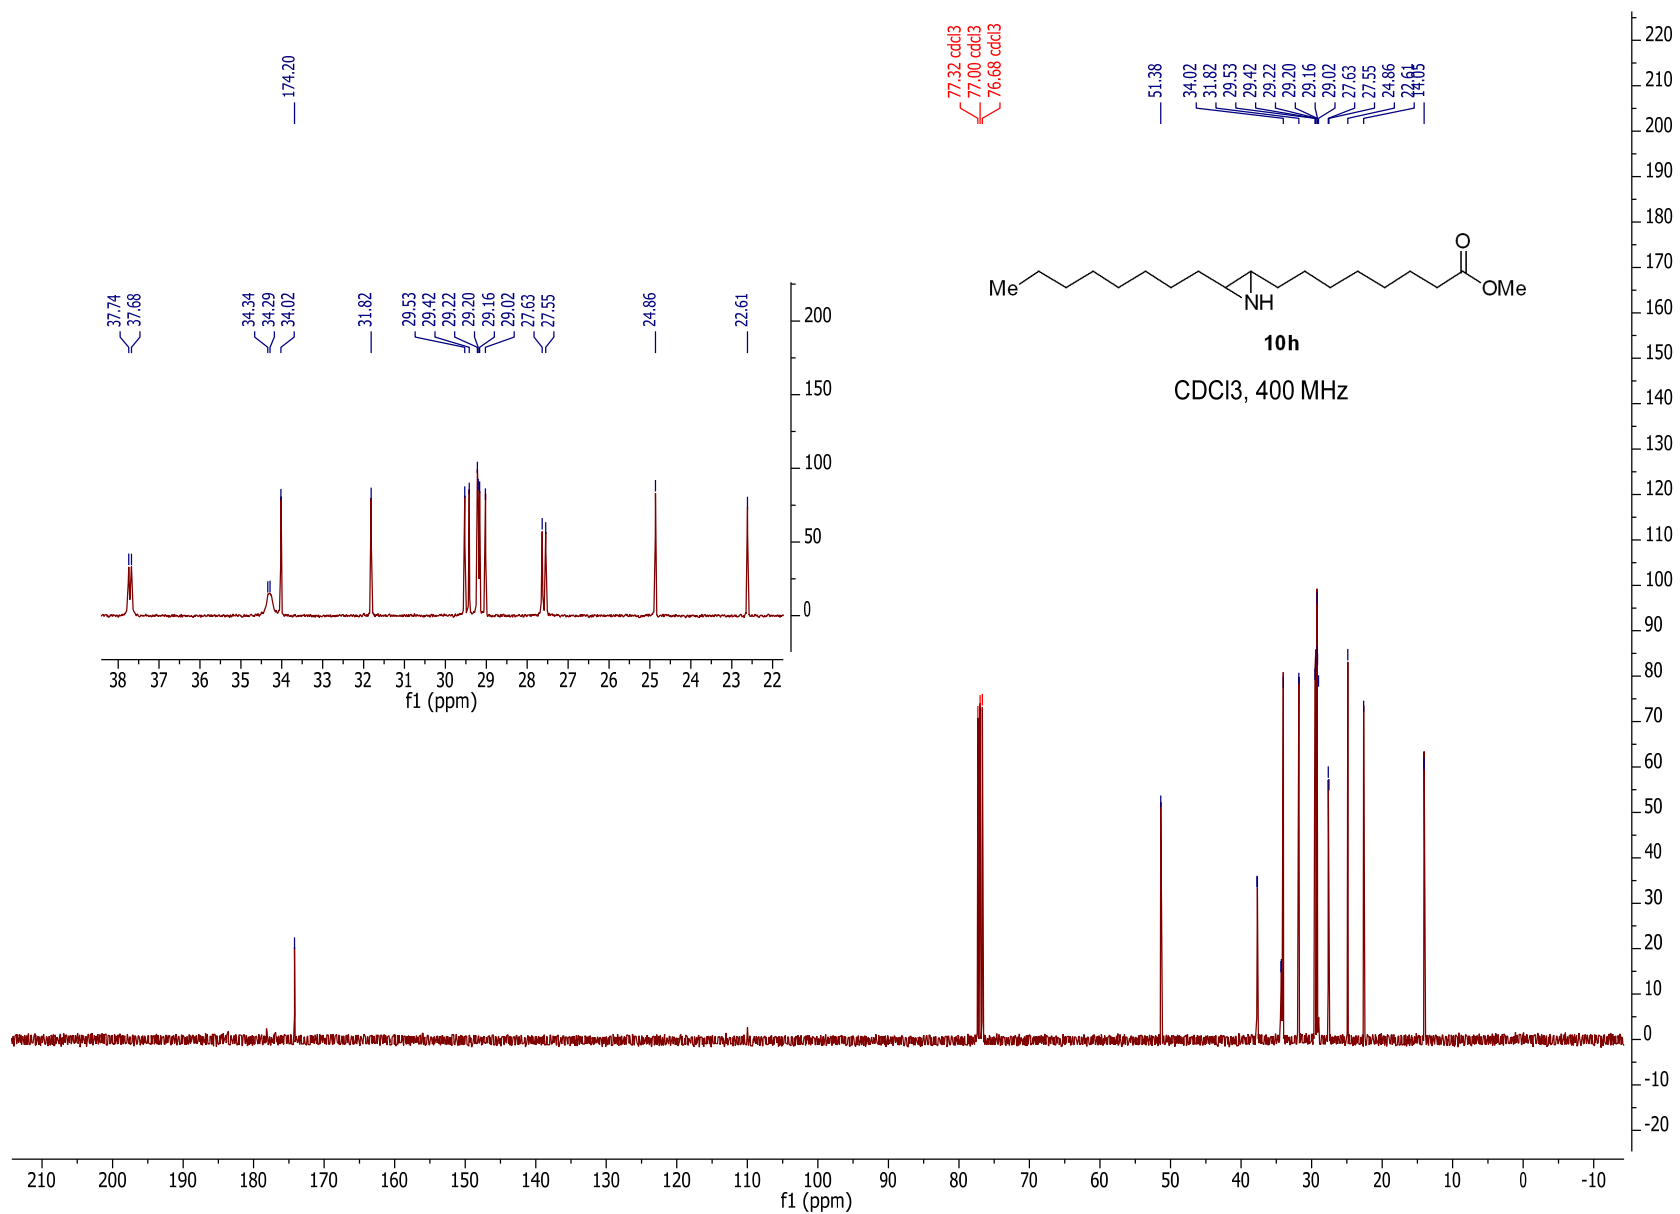

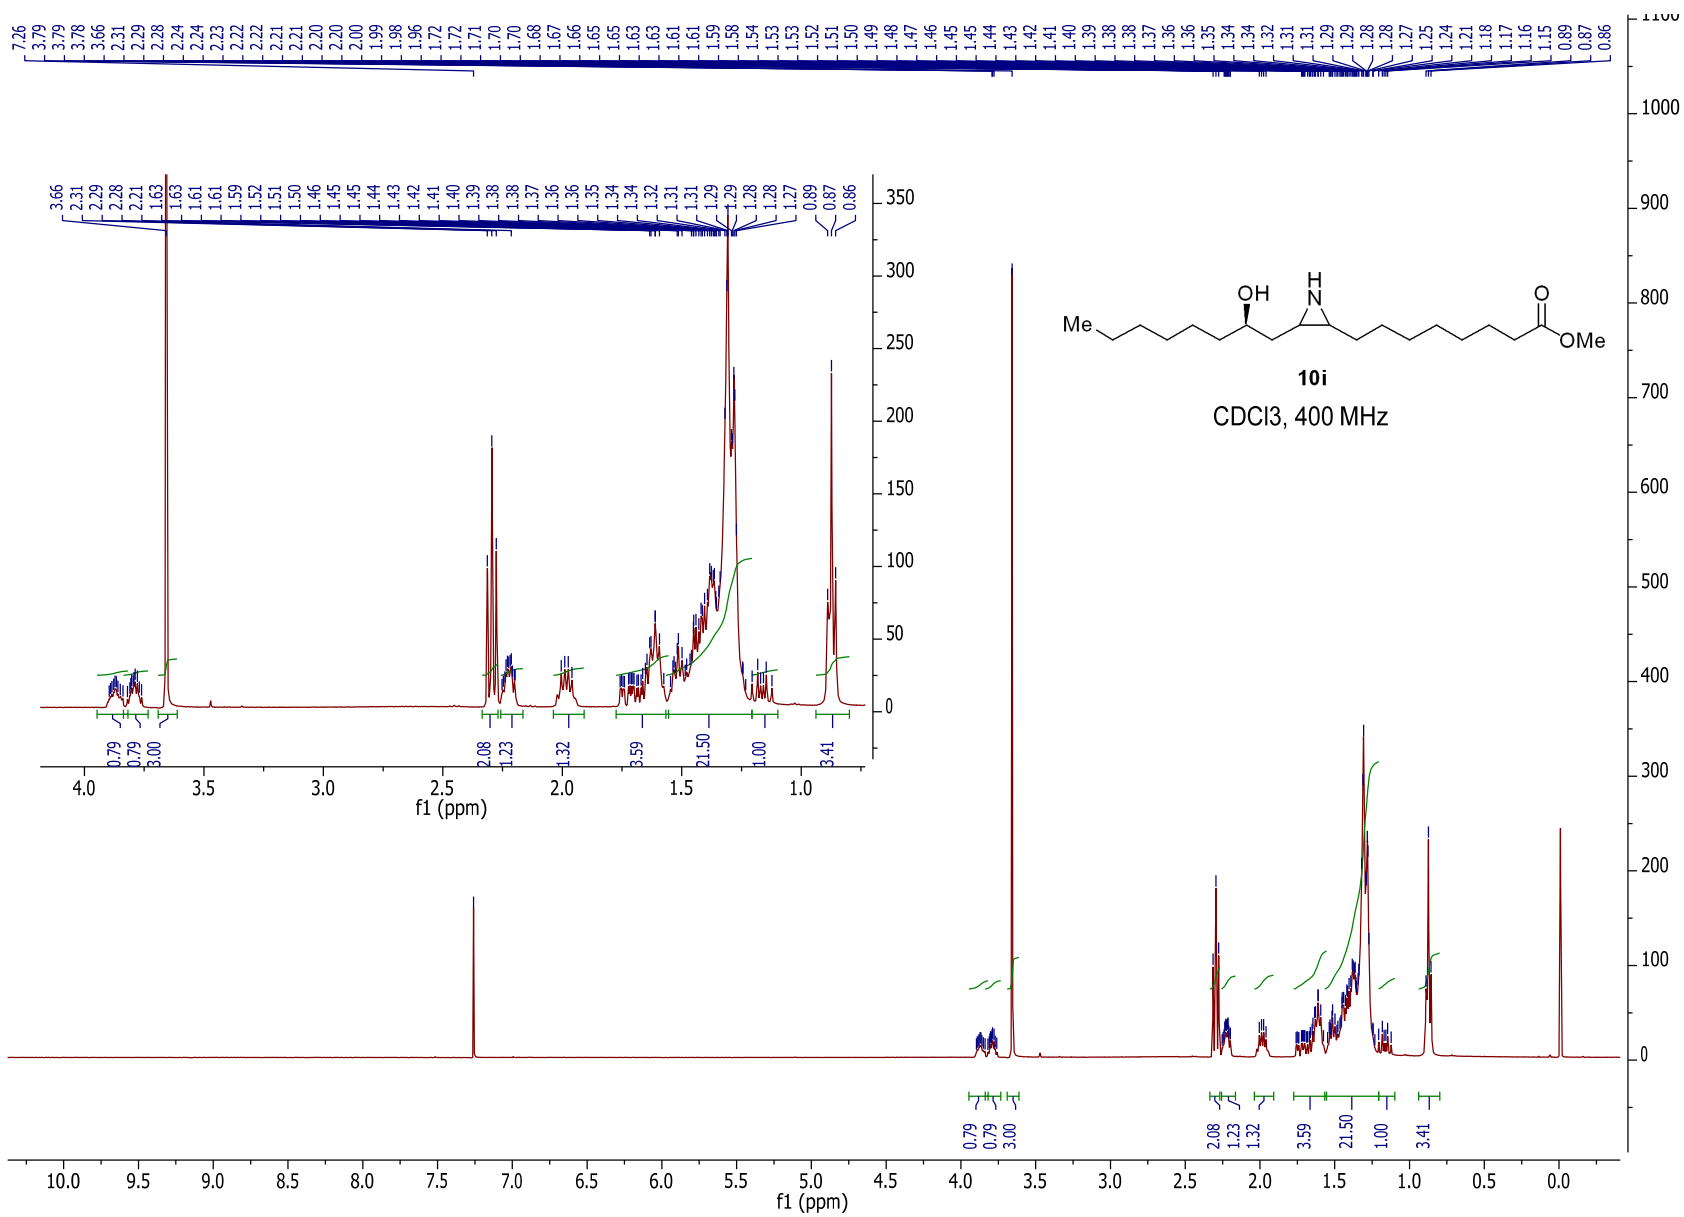



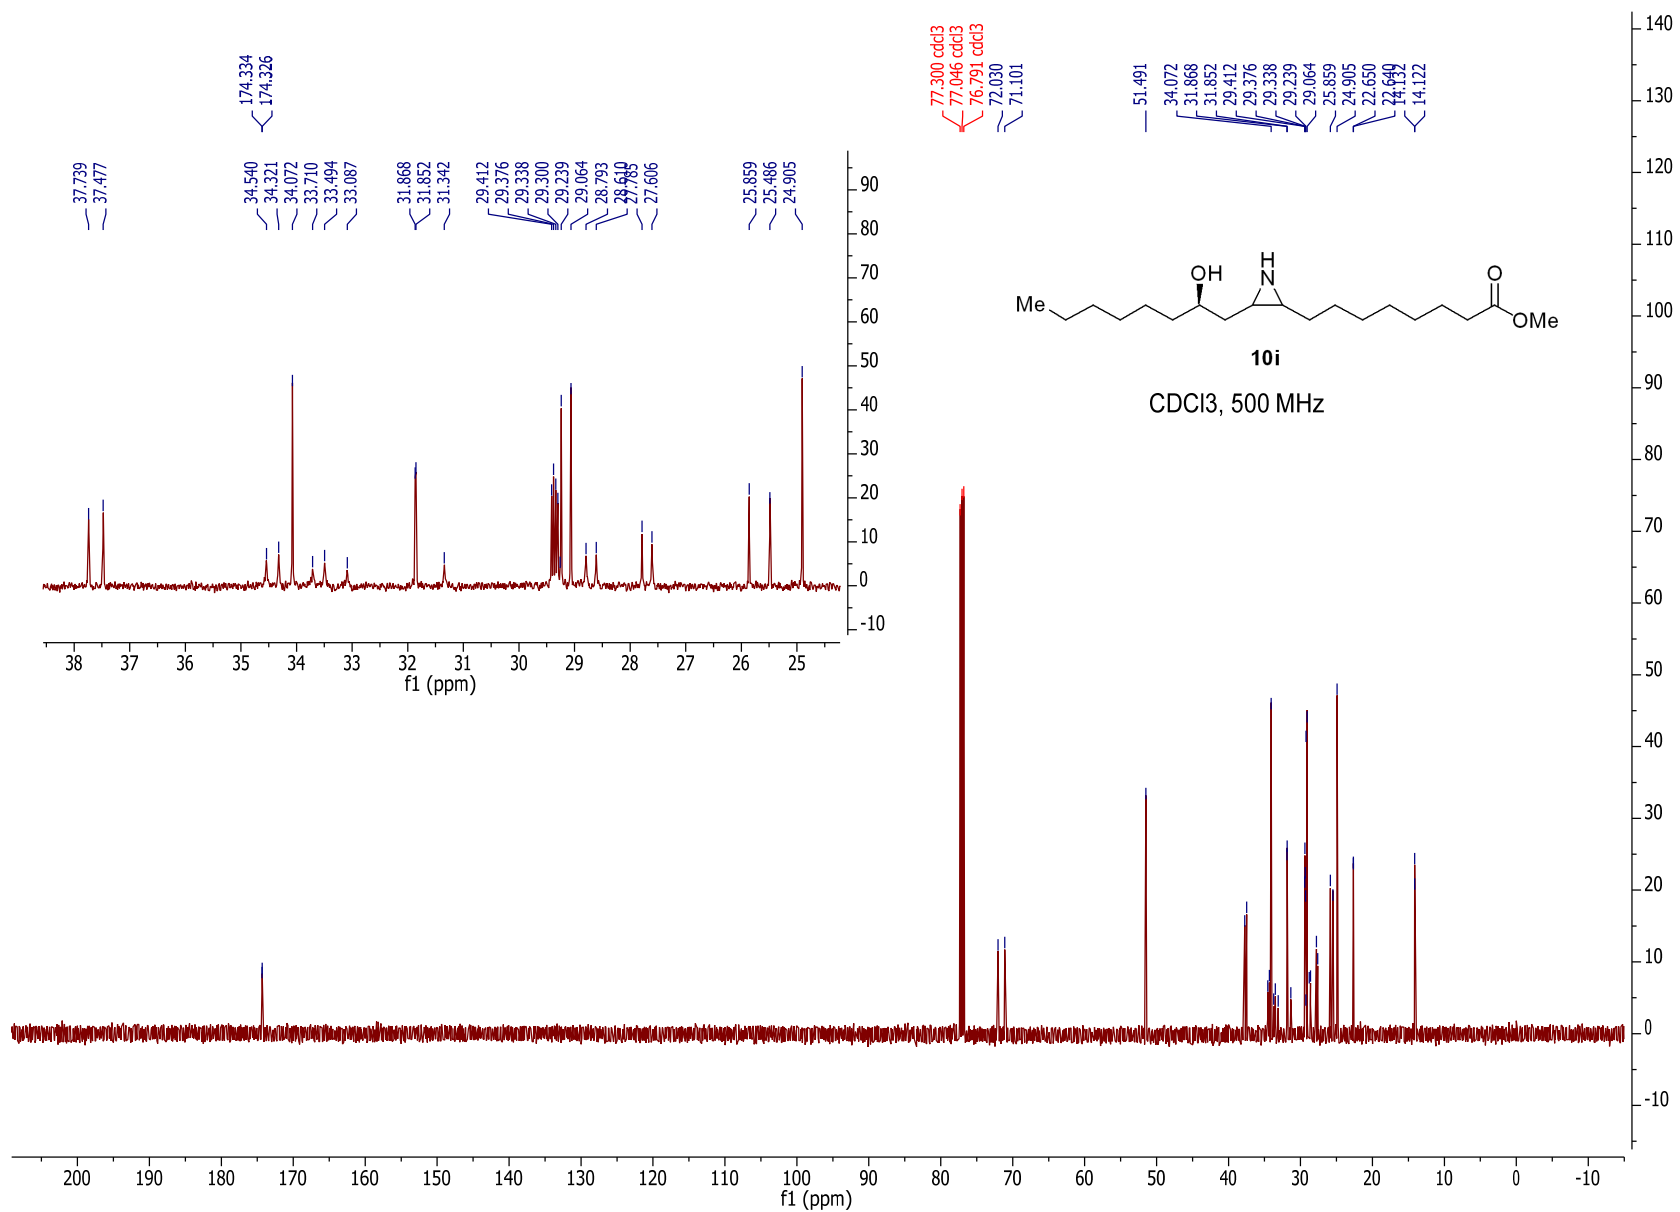

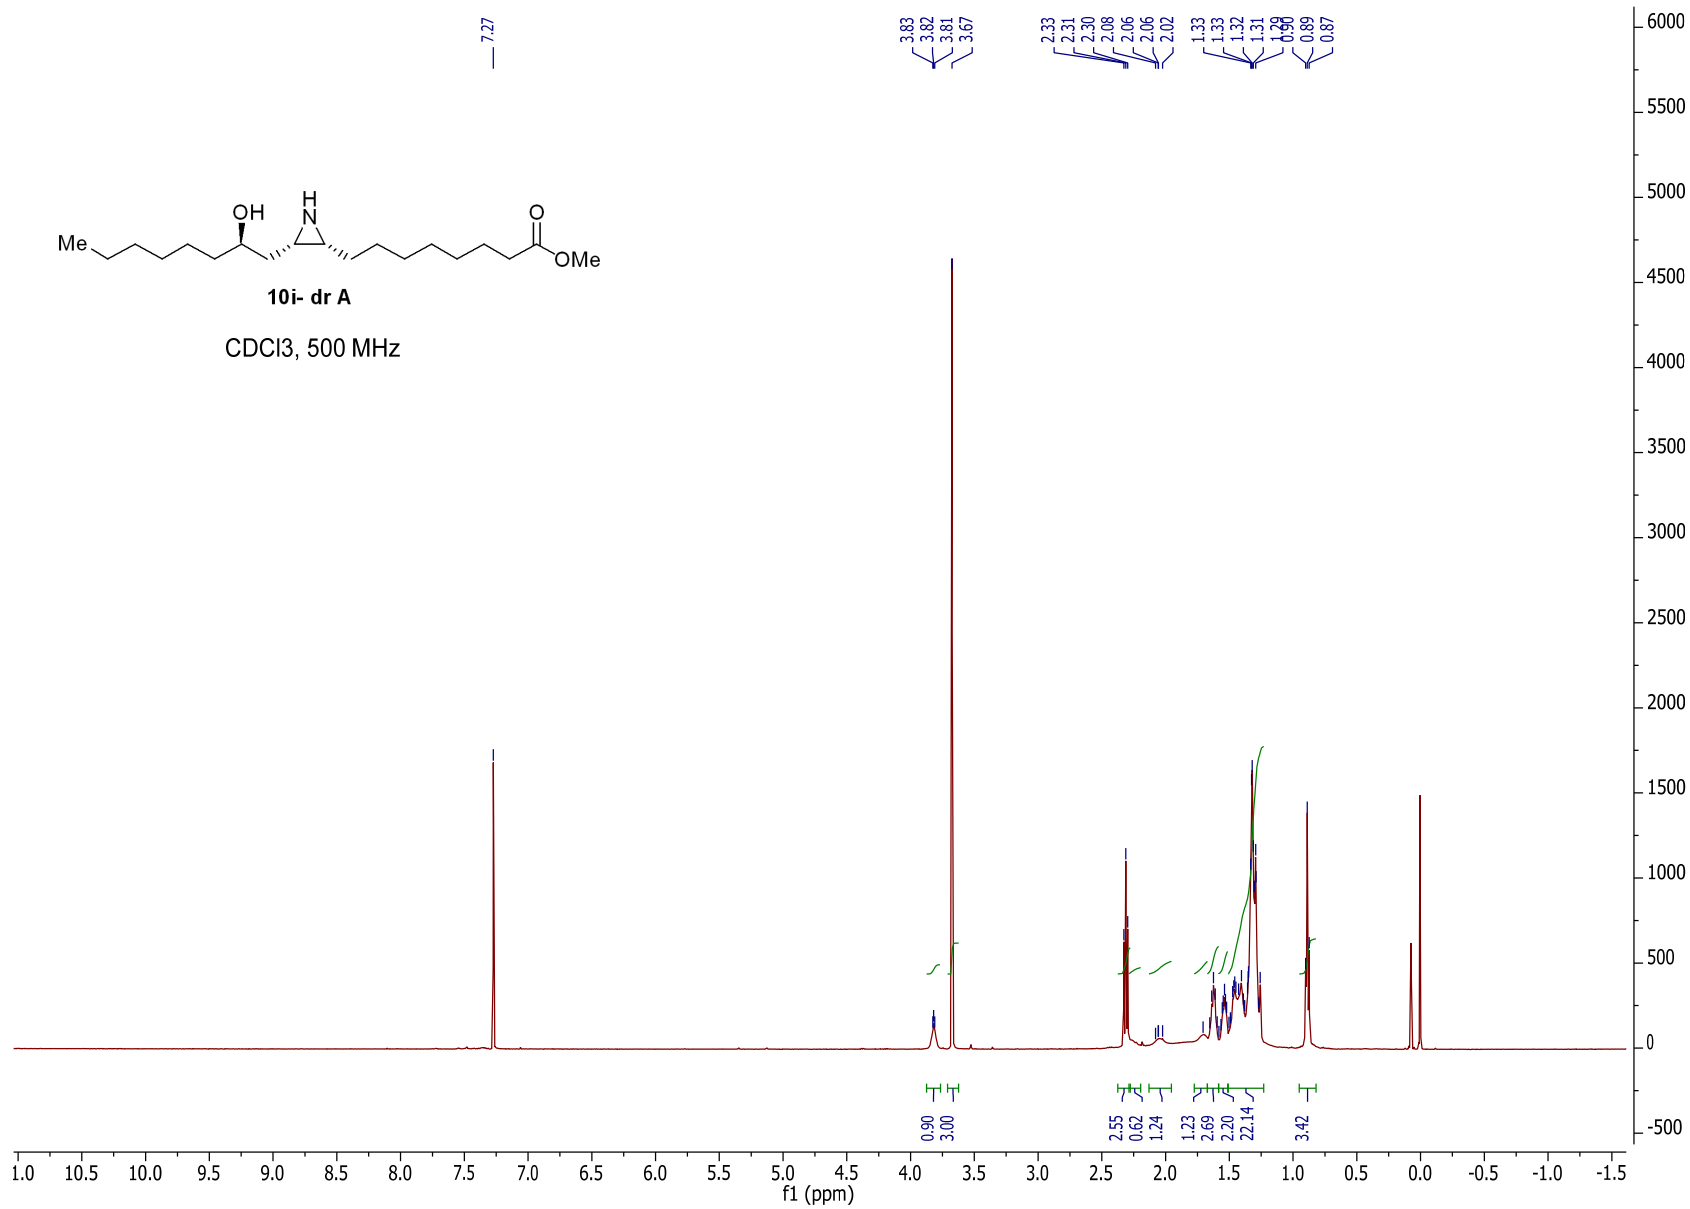

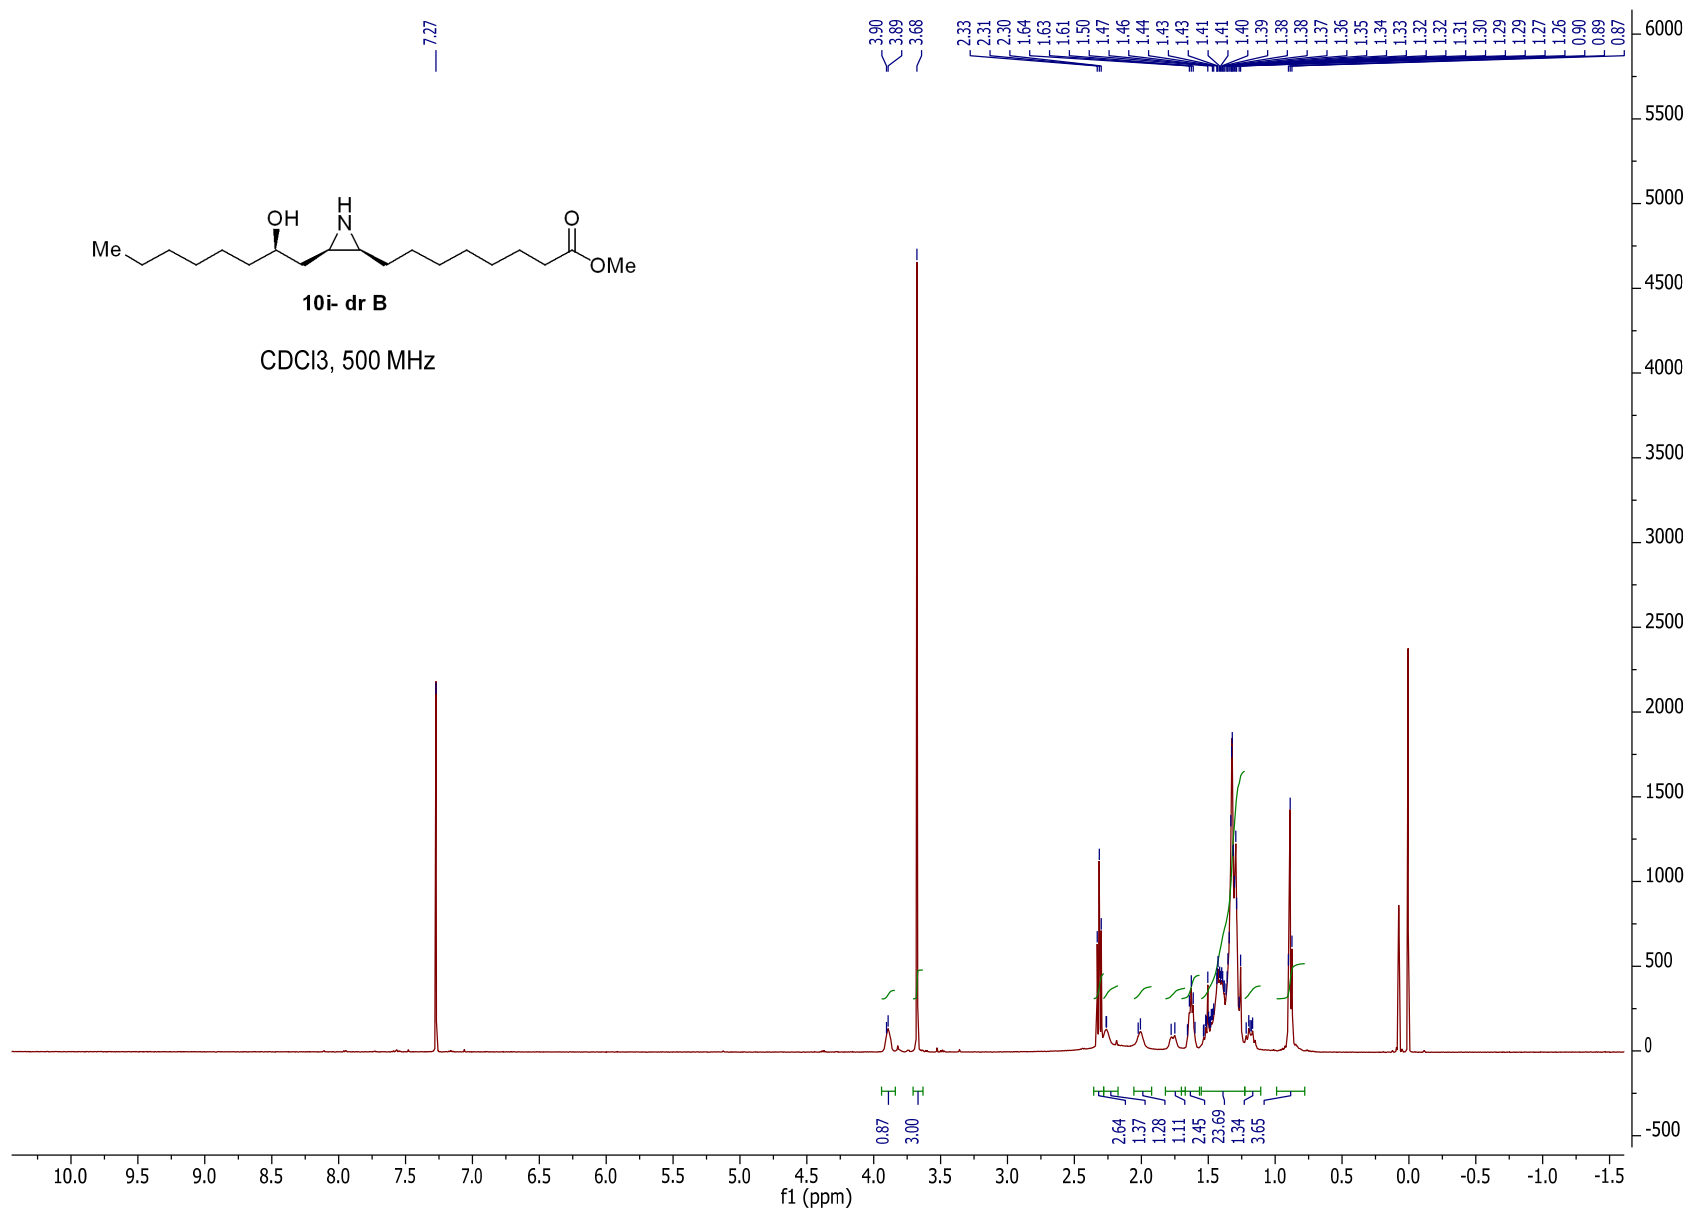

SI-131

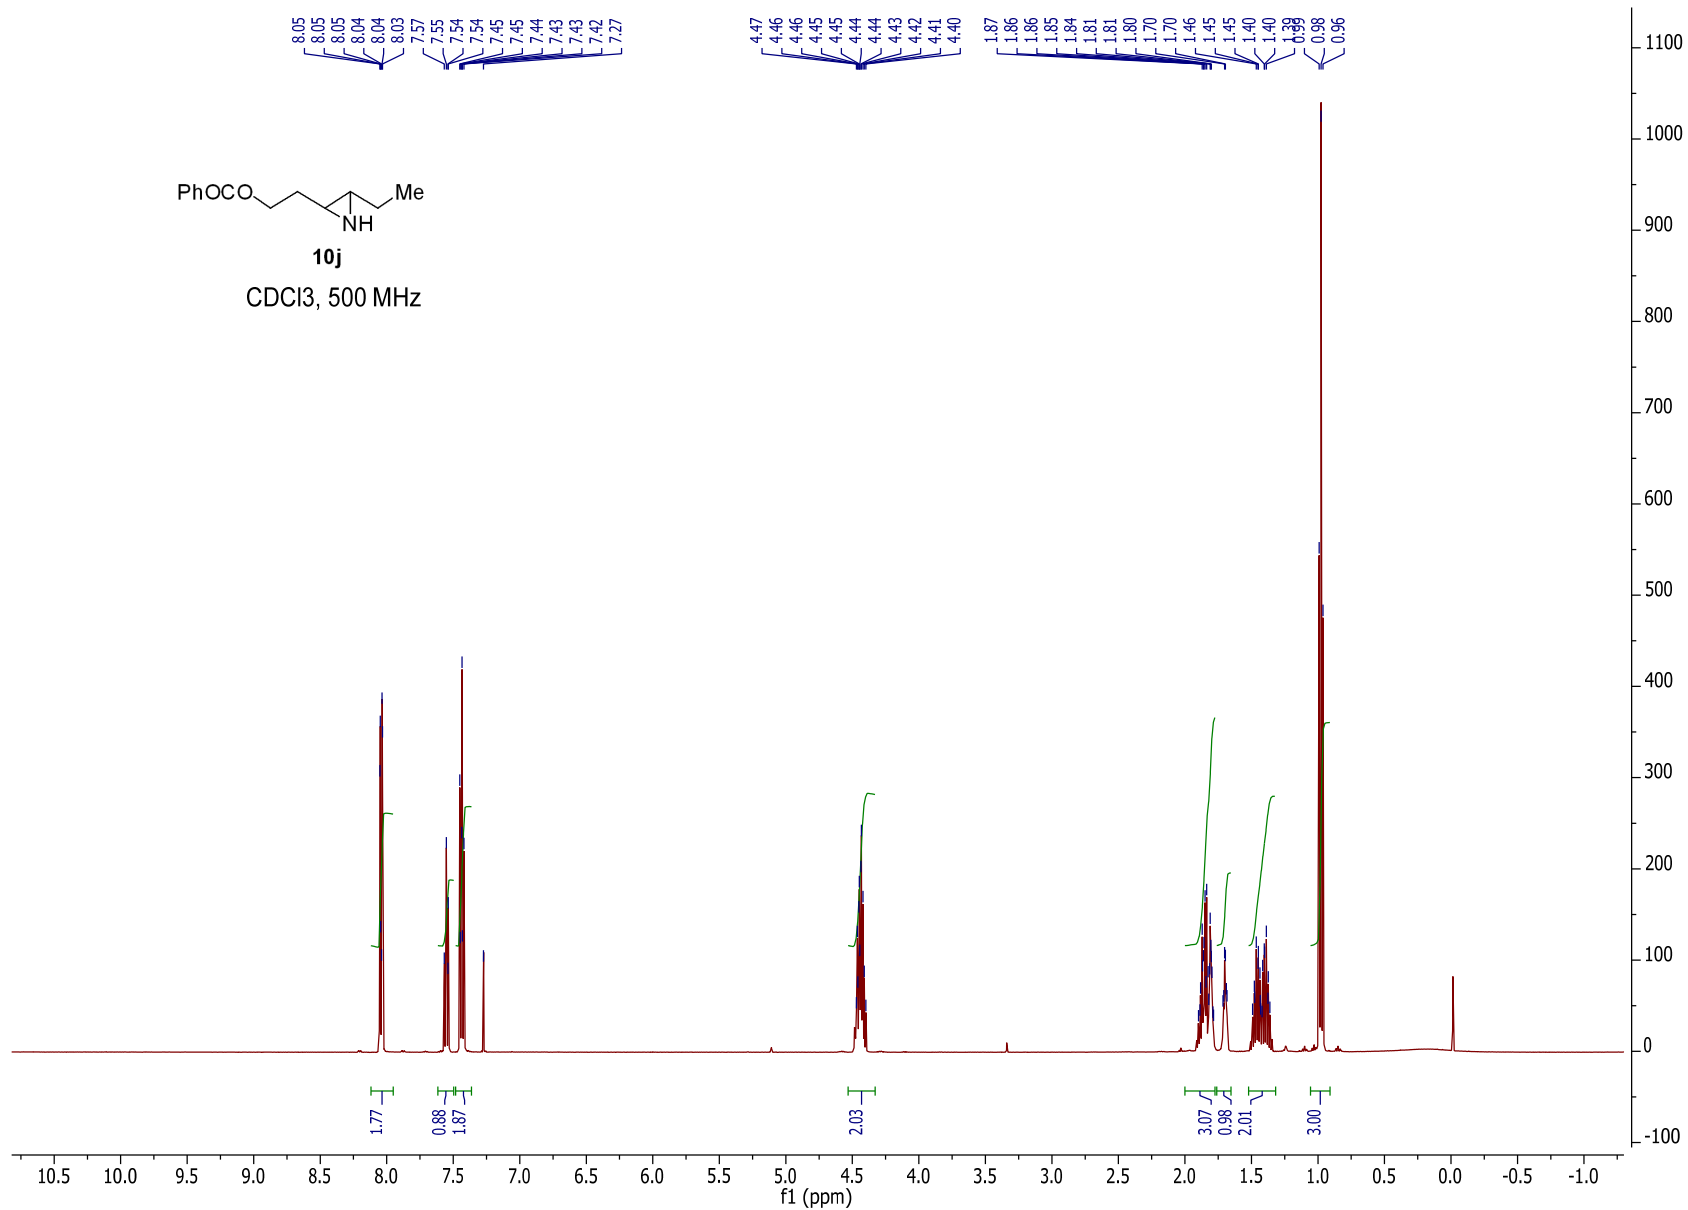

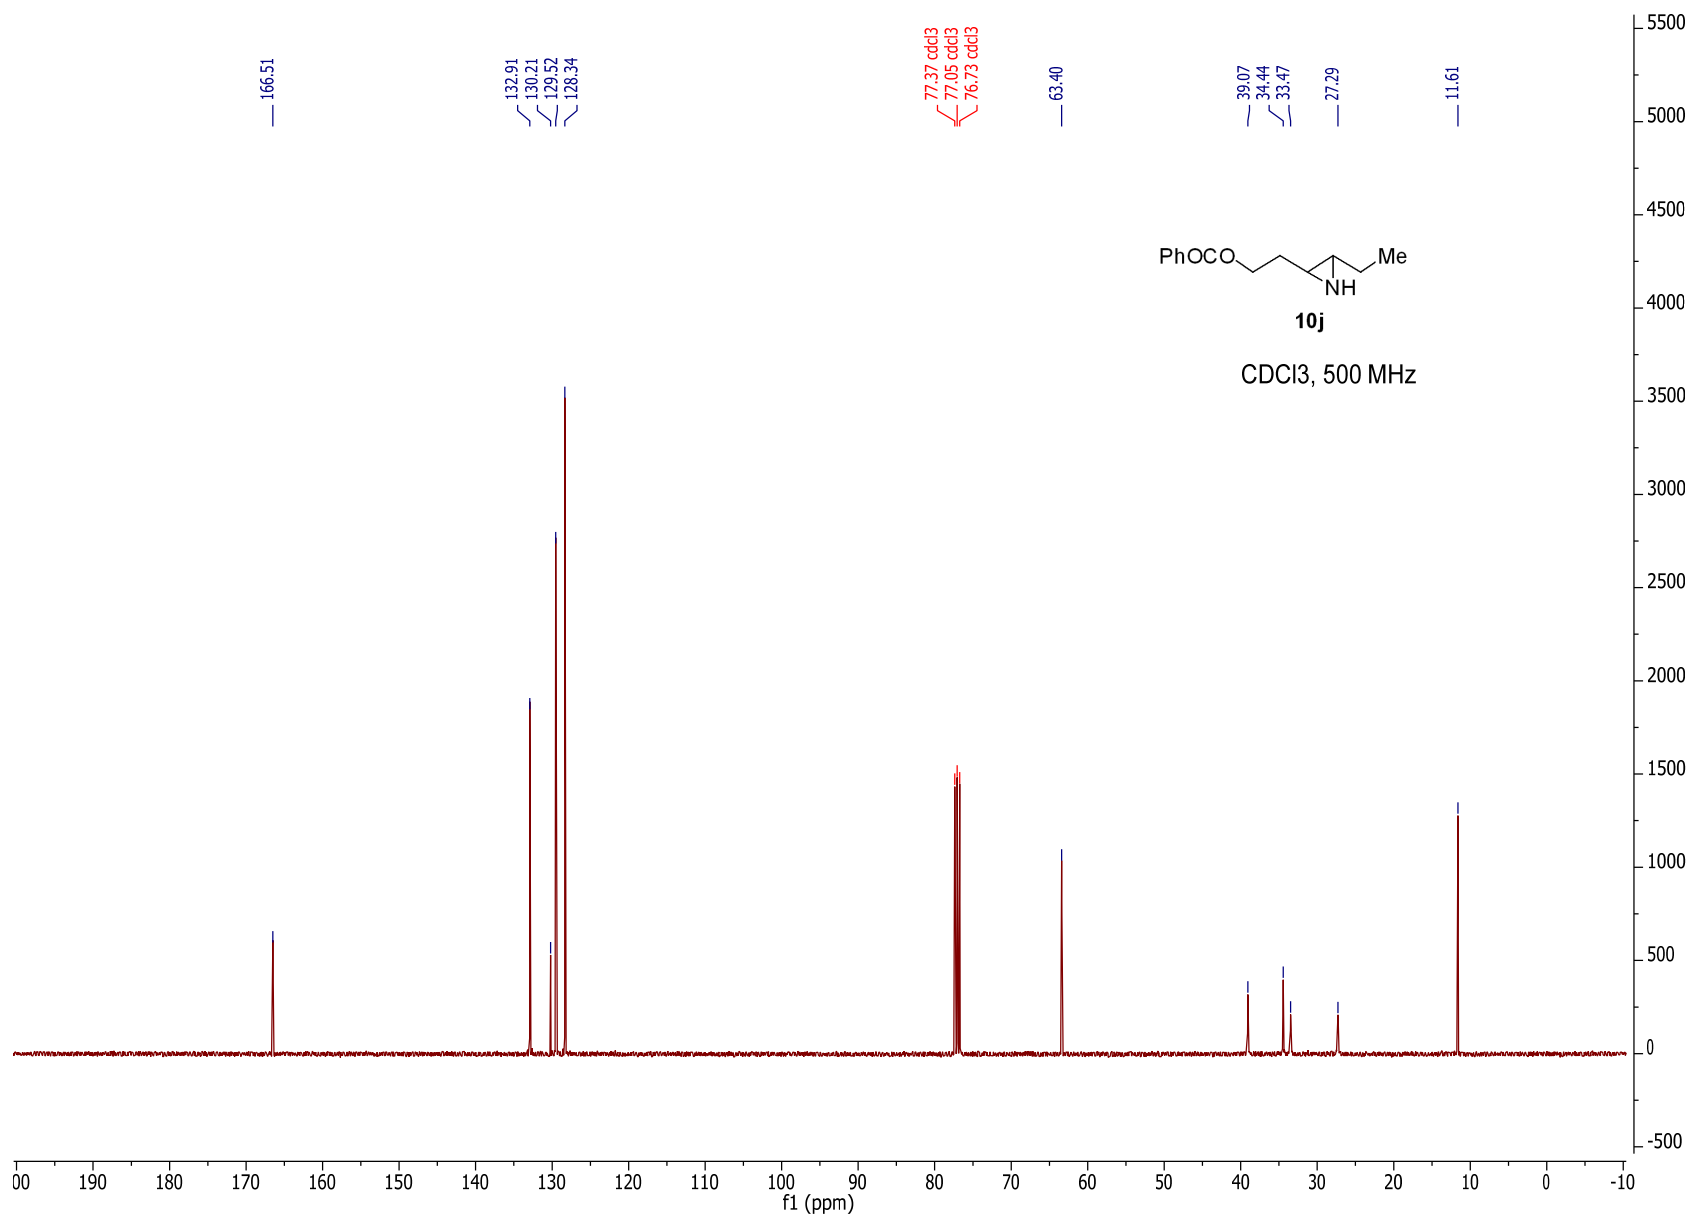

SI-133

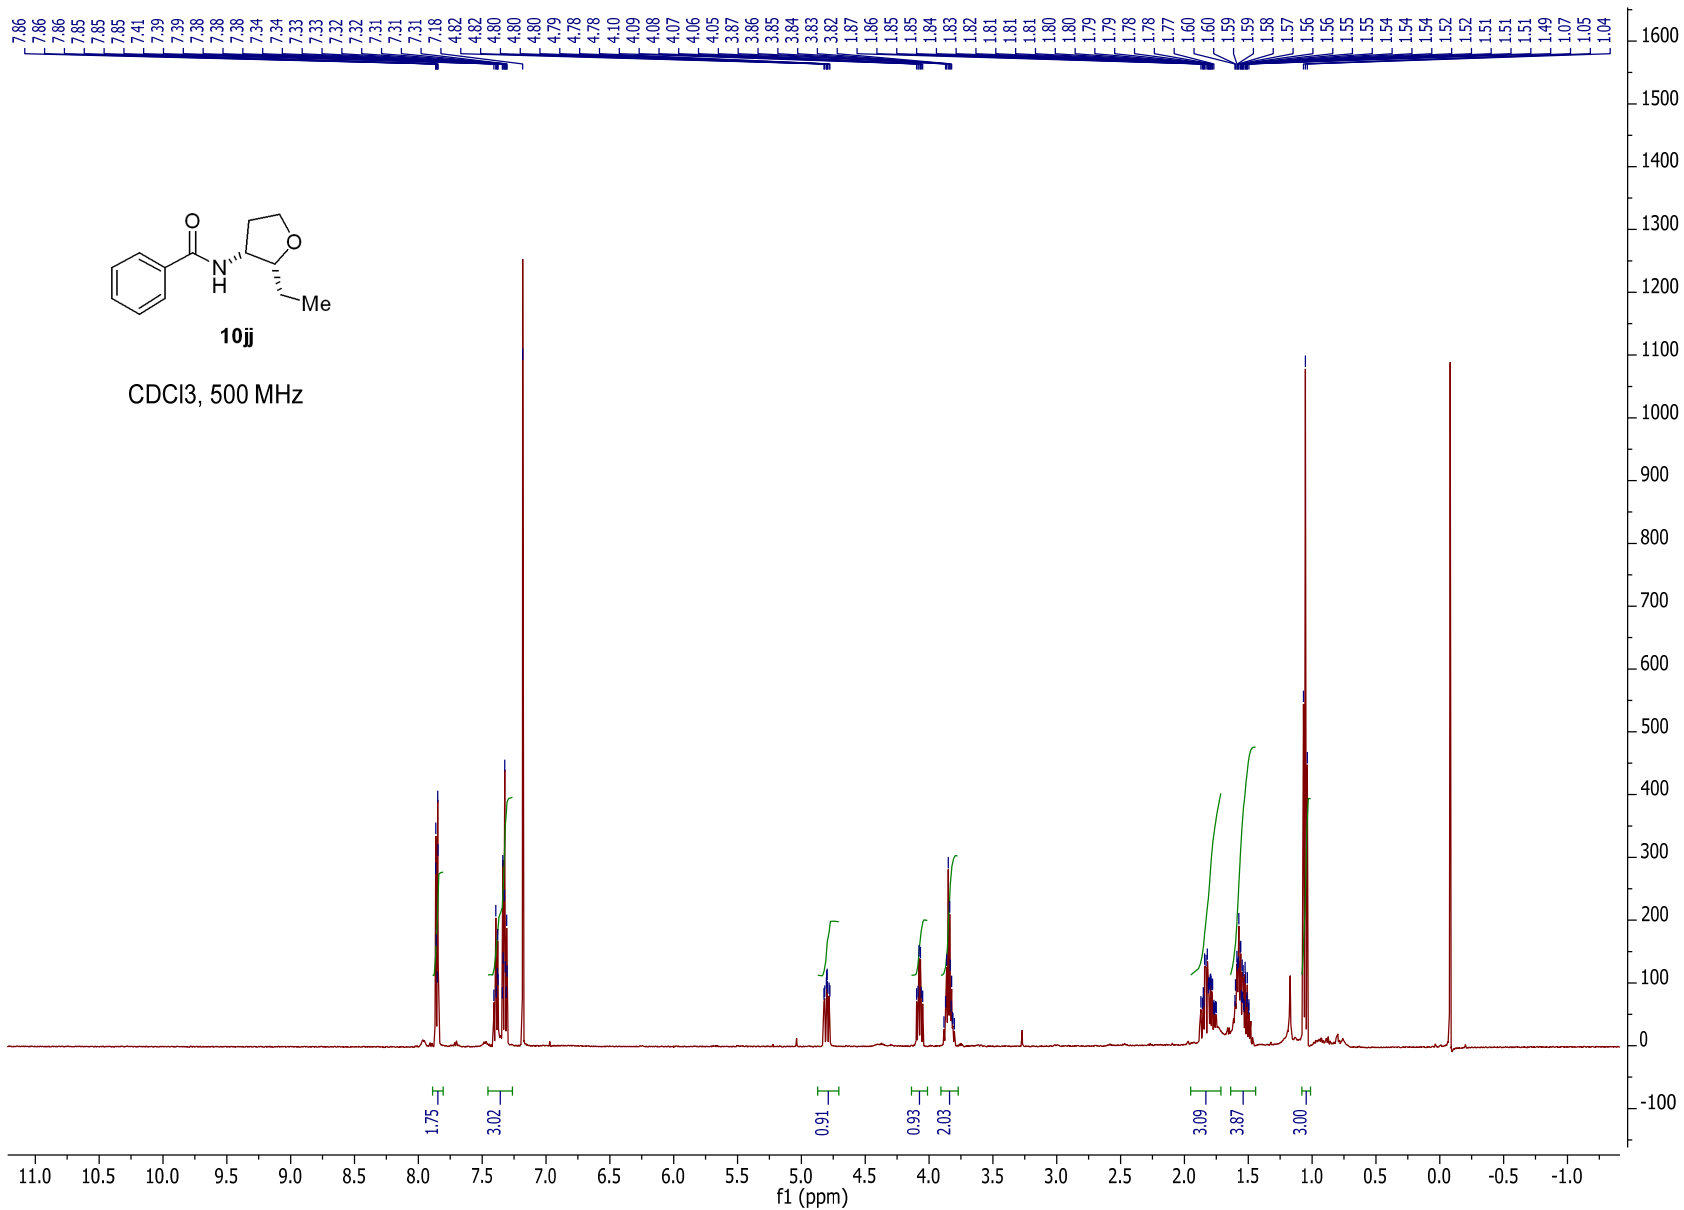

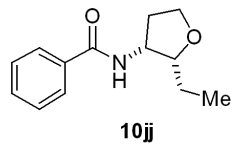

CDCl<sub>3</sub>, 400 MHz

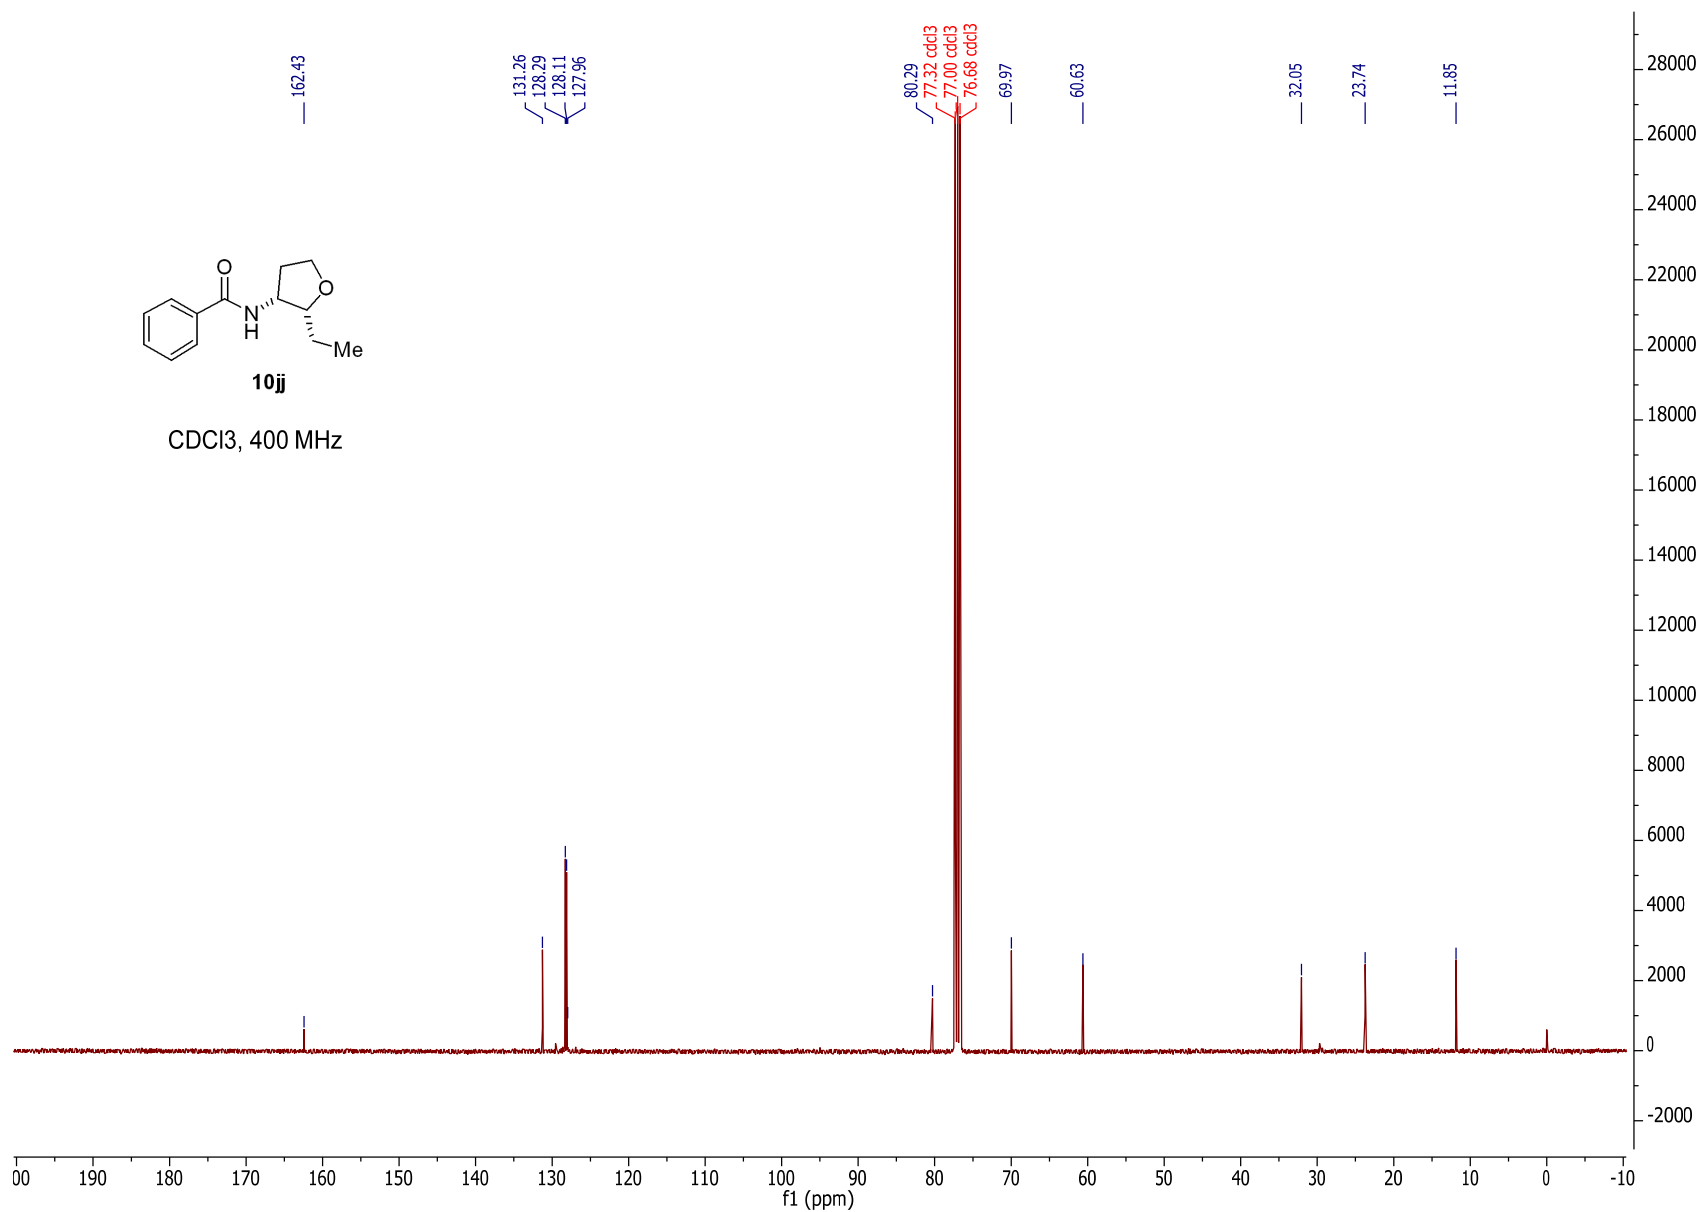

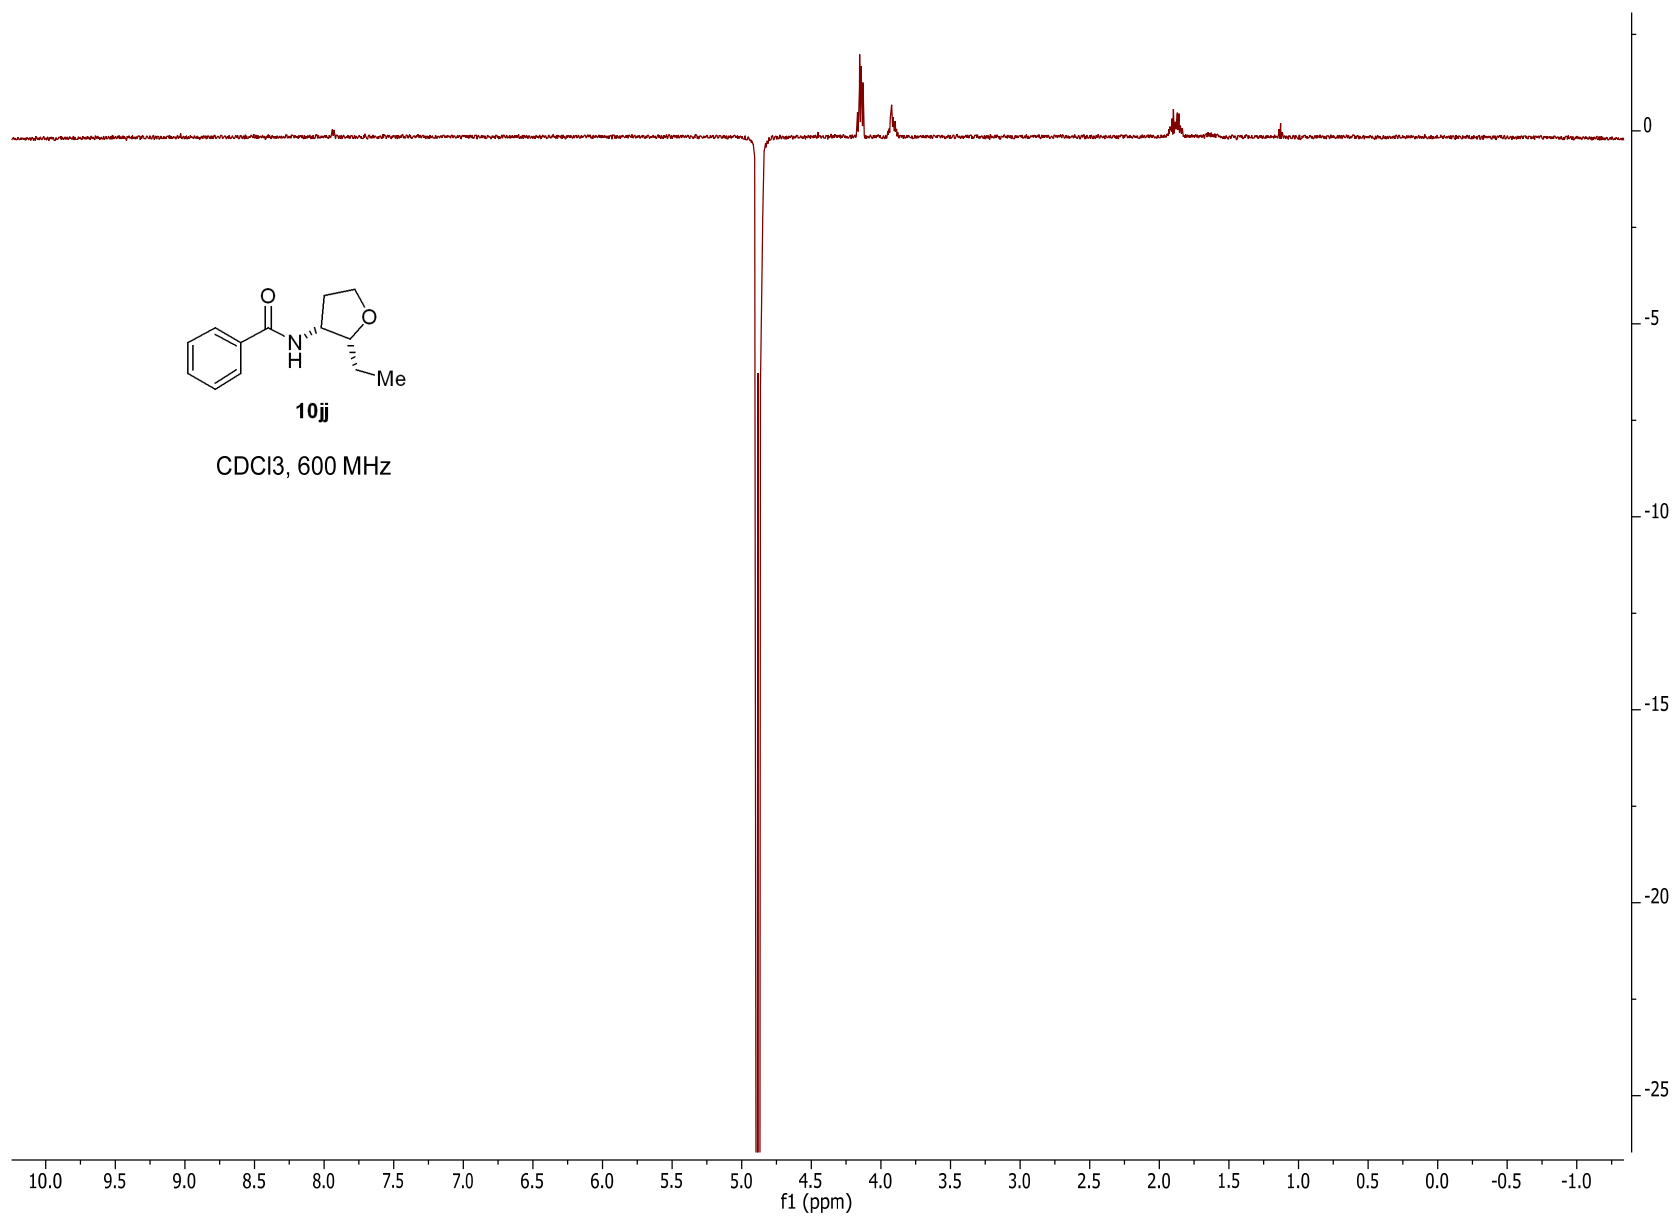

SI-136



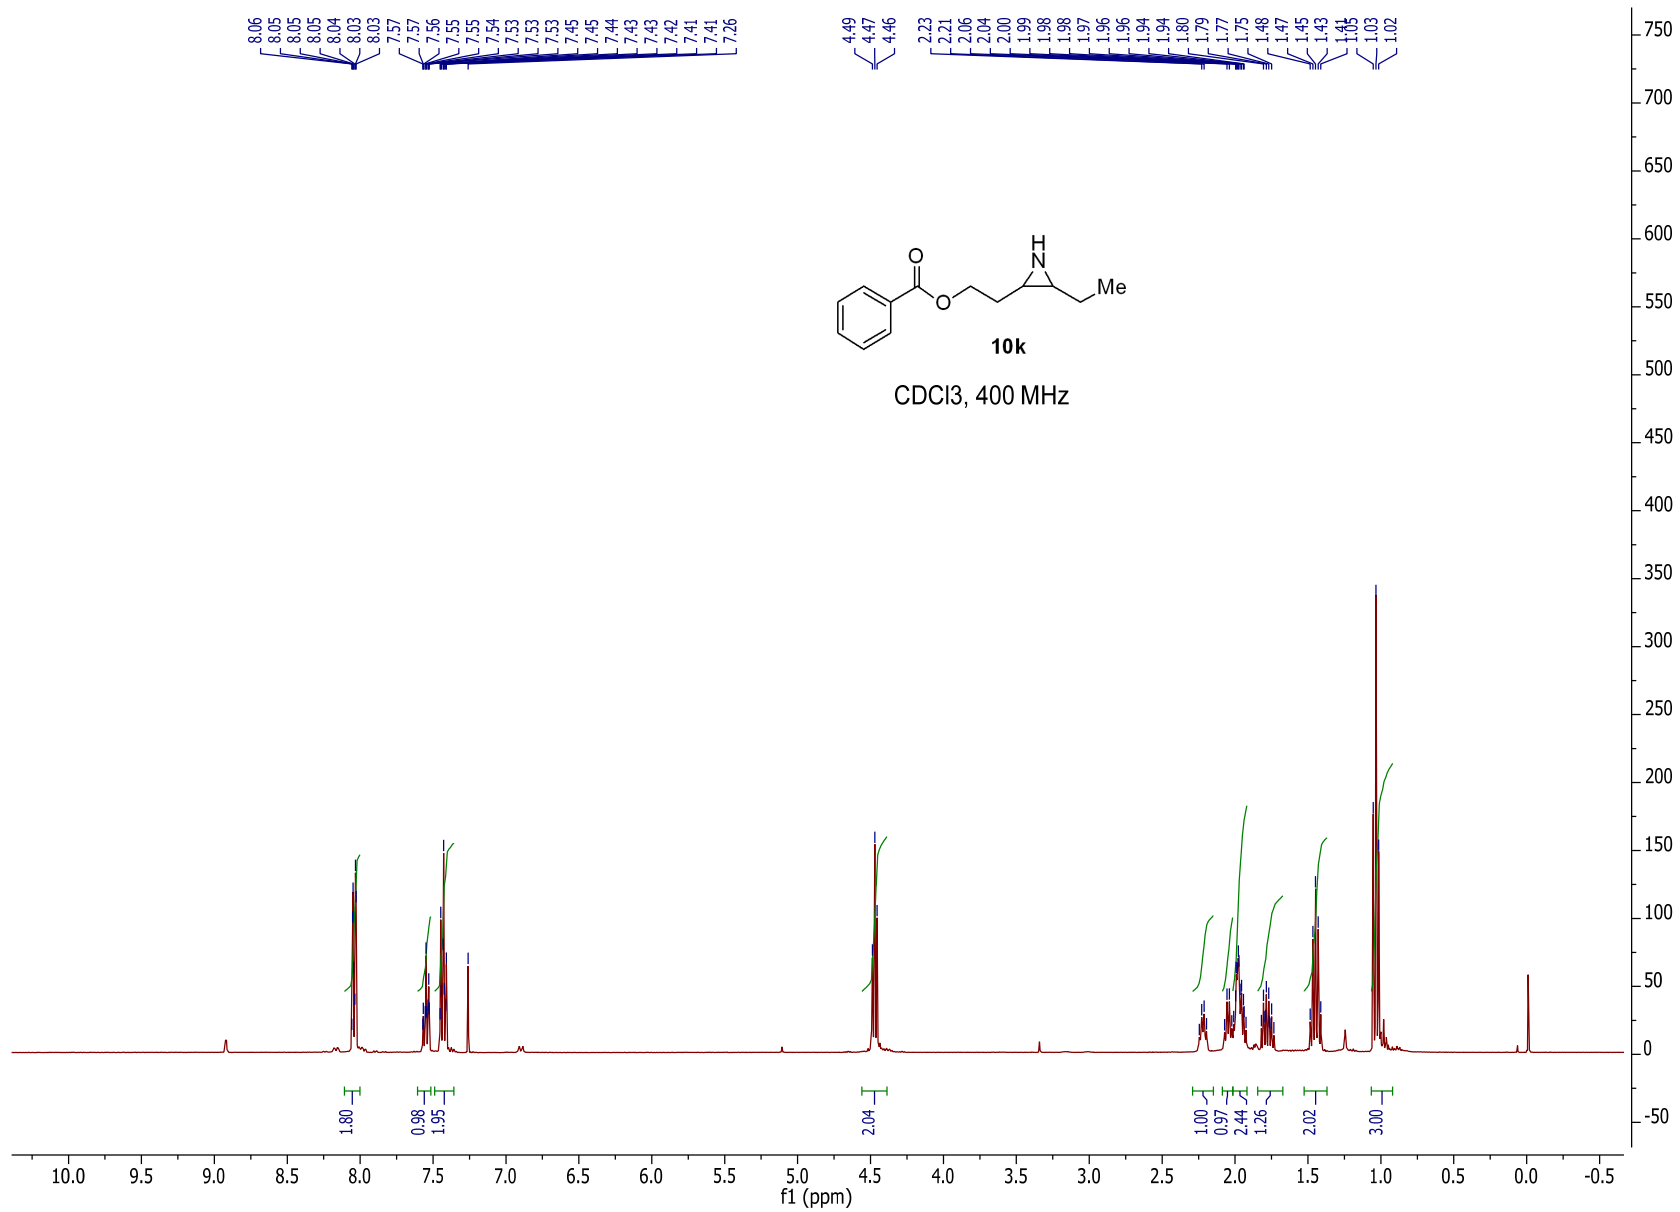

SI-137

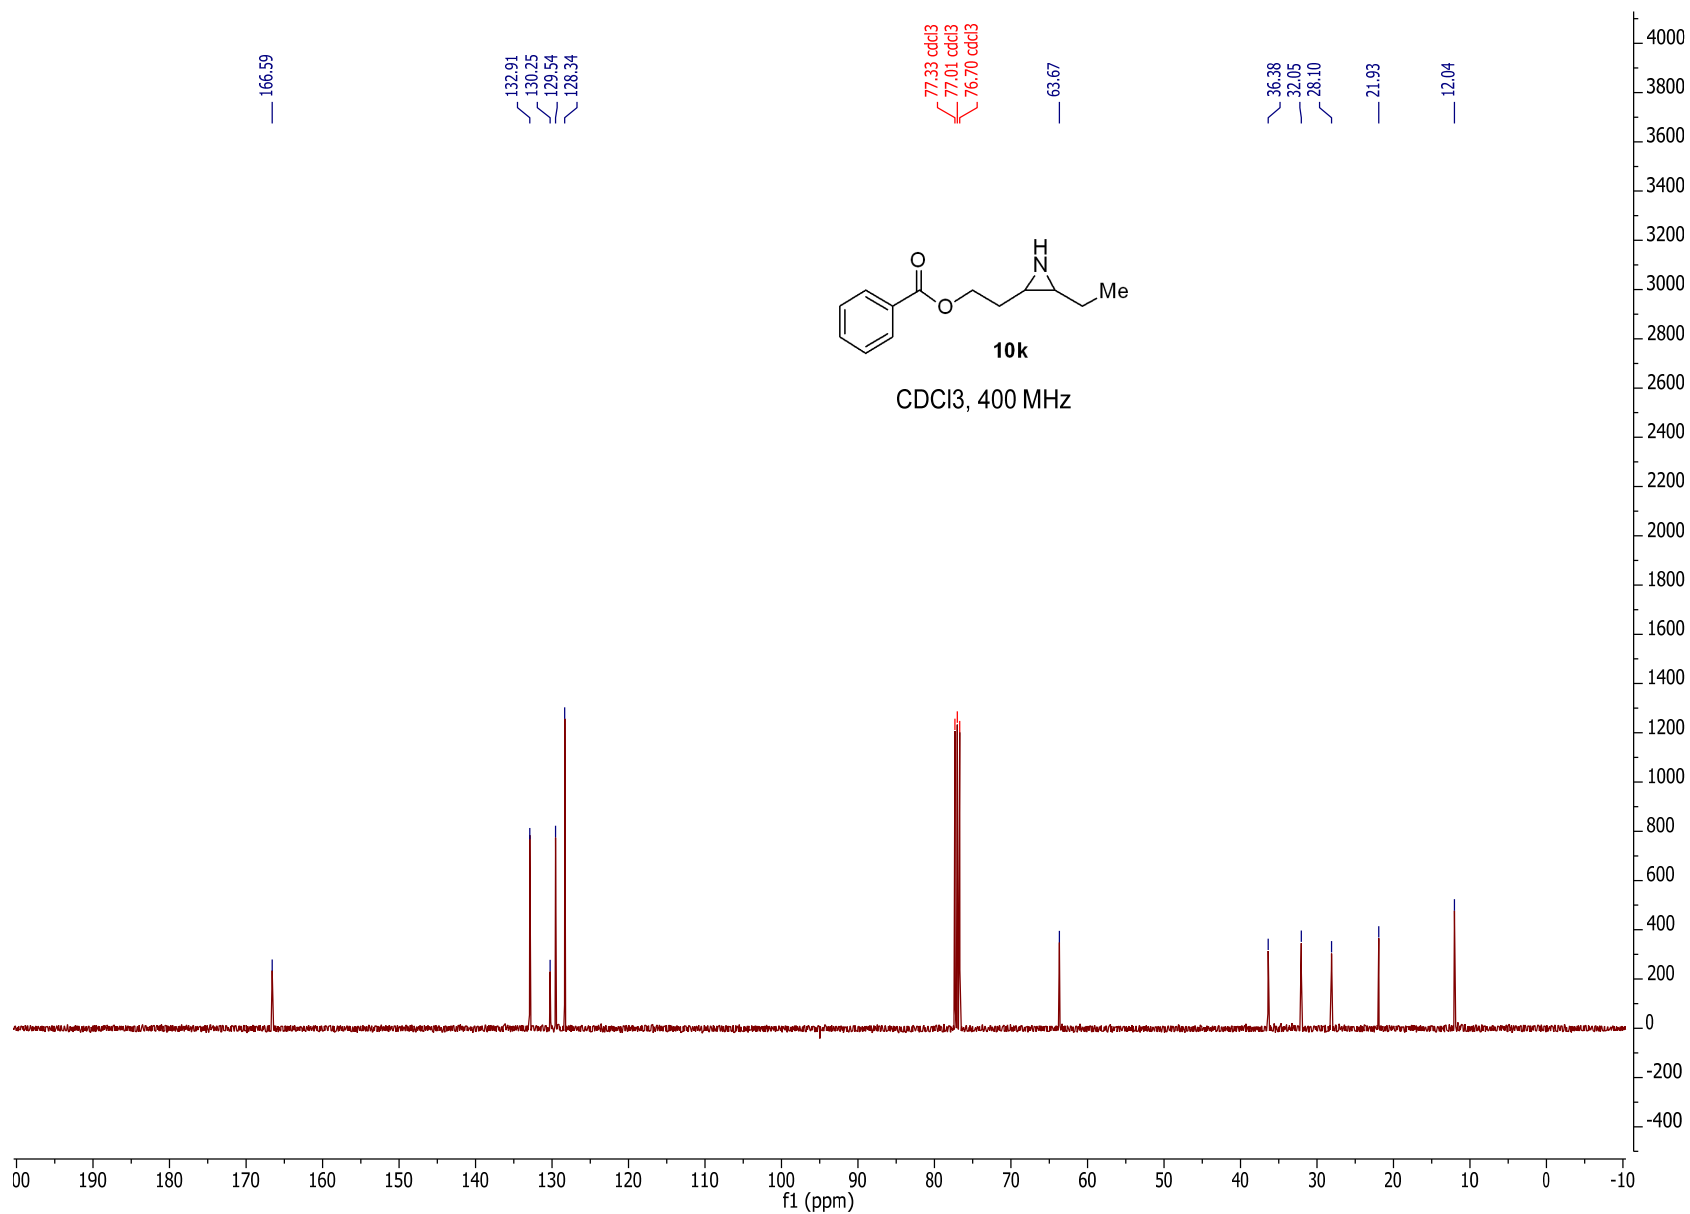

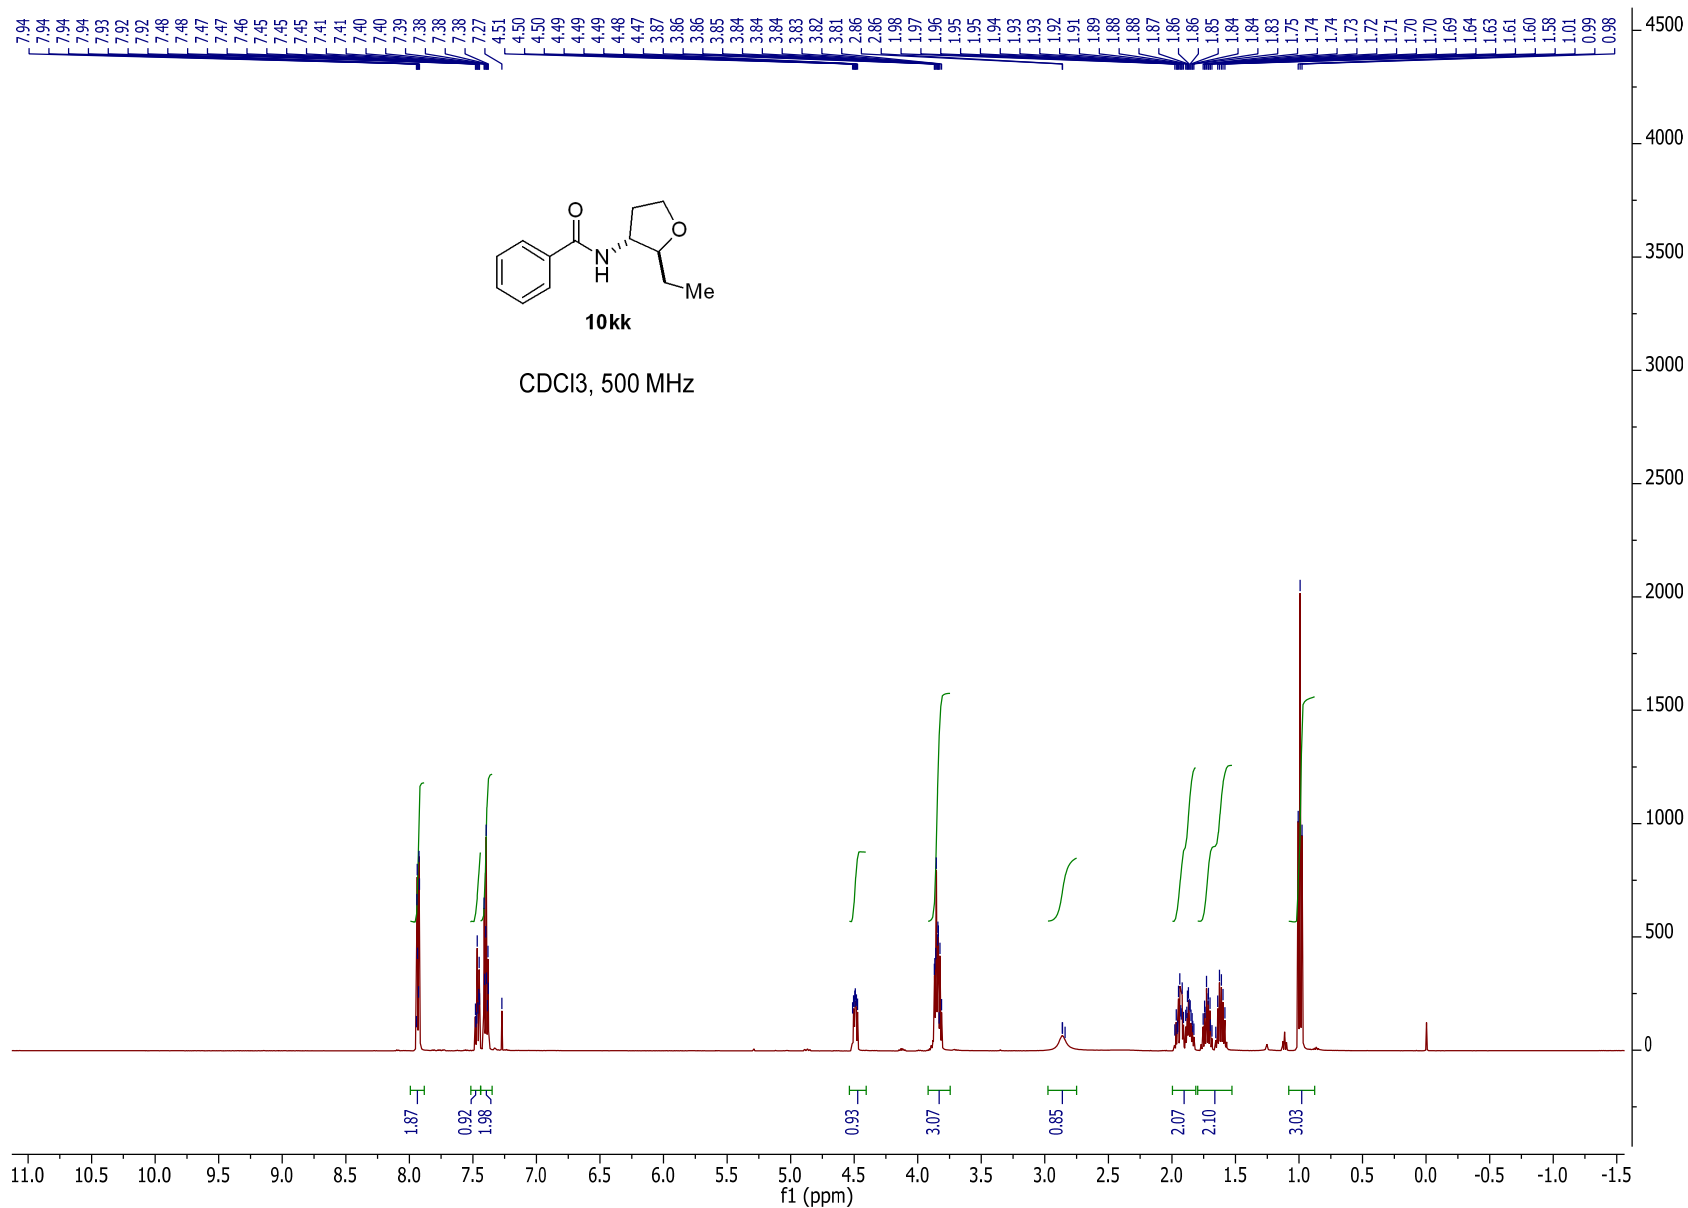

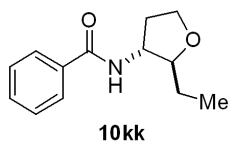

CDCl<sub>3</sub>, 500 MHz

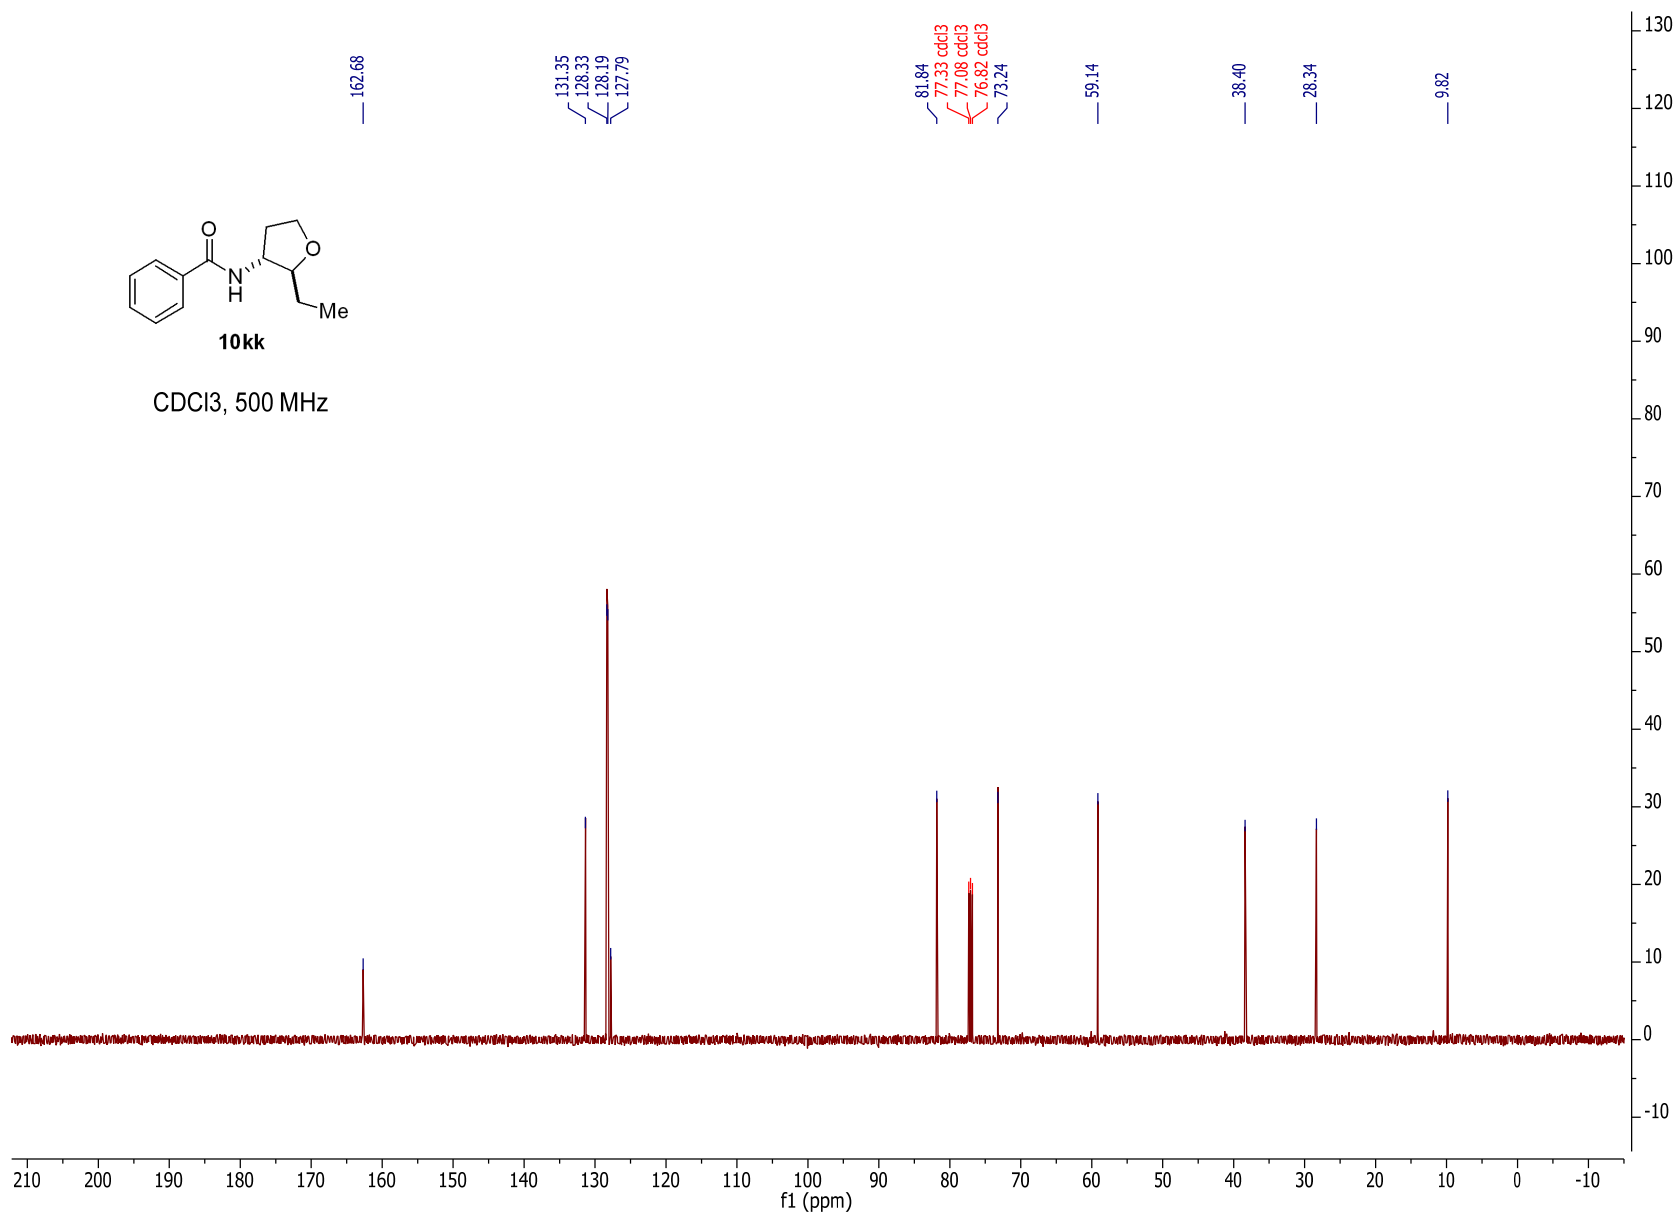

SI-140

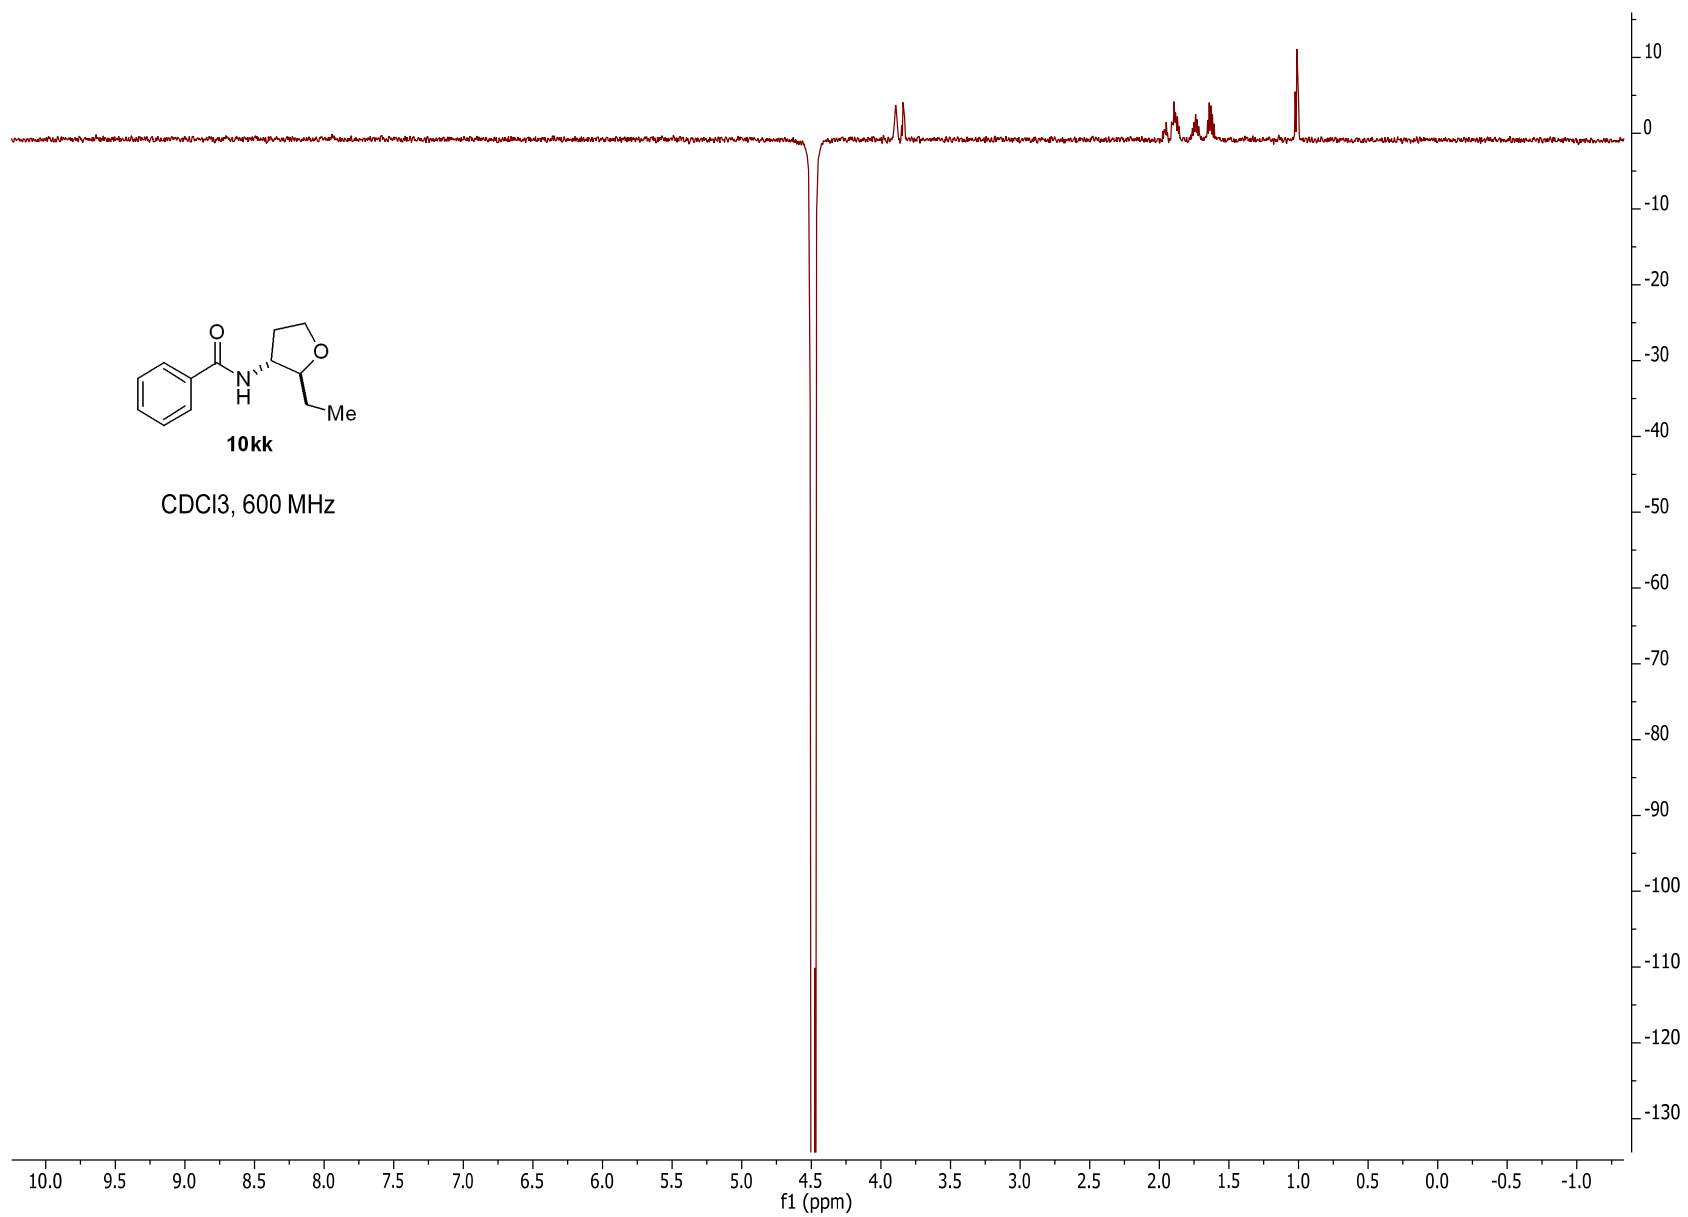

SI-141

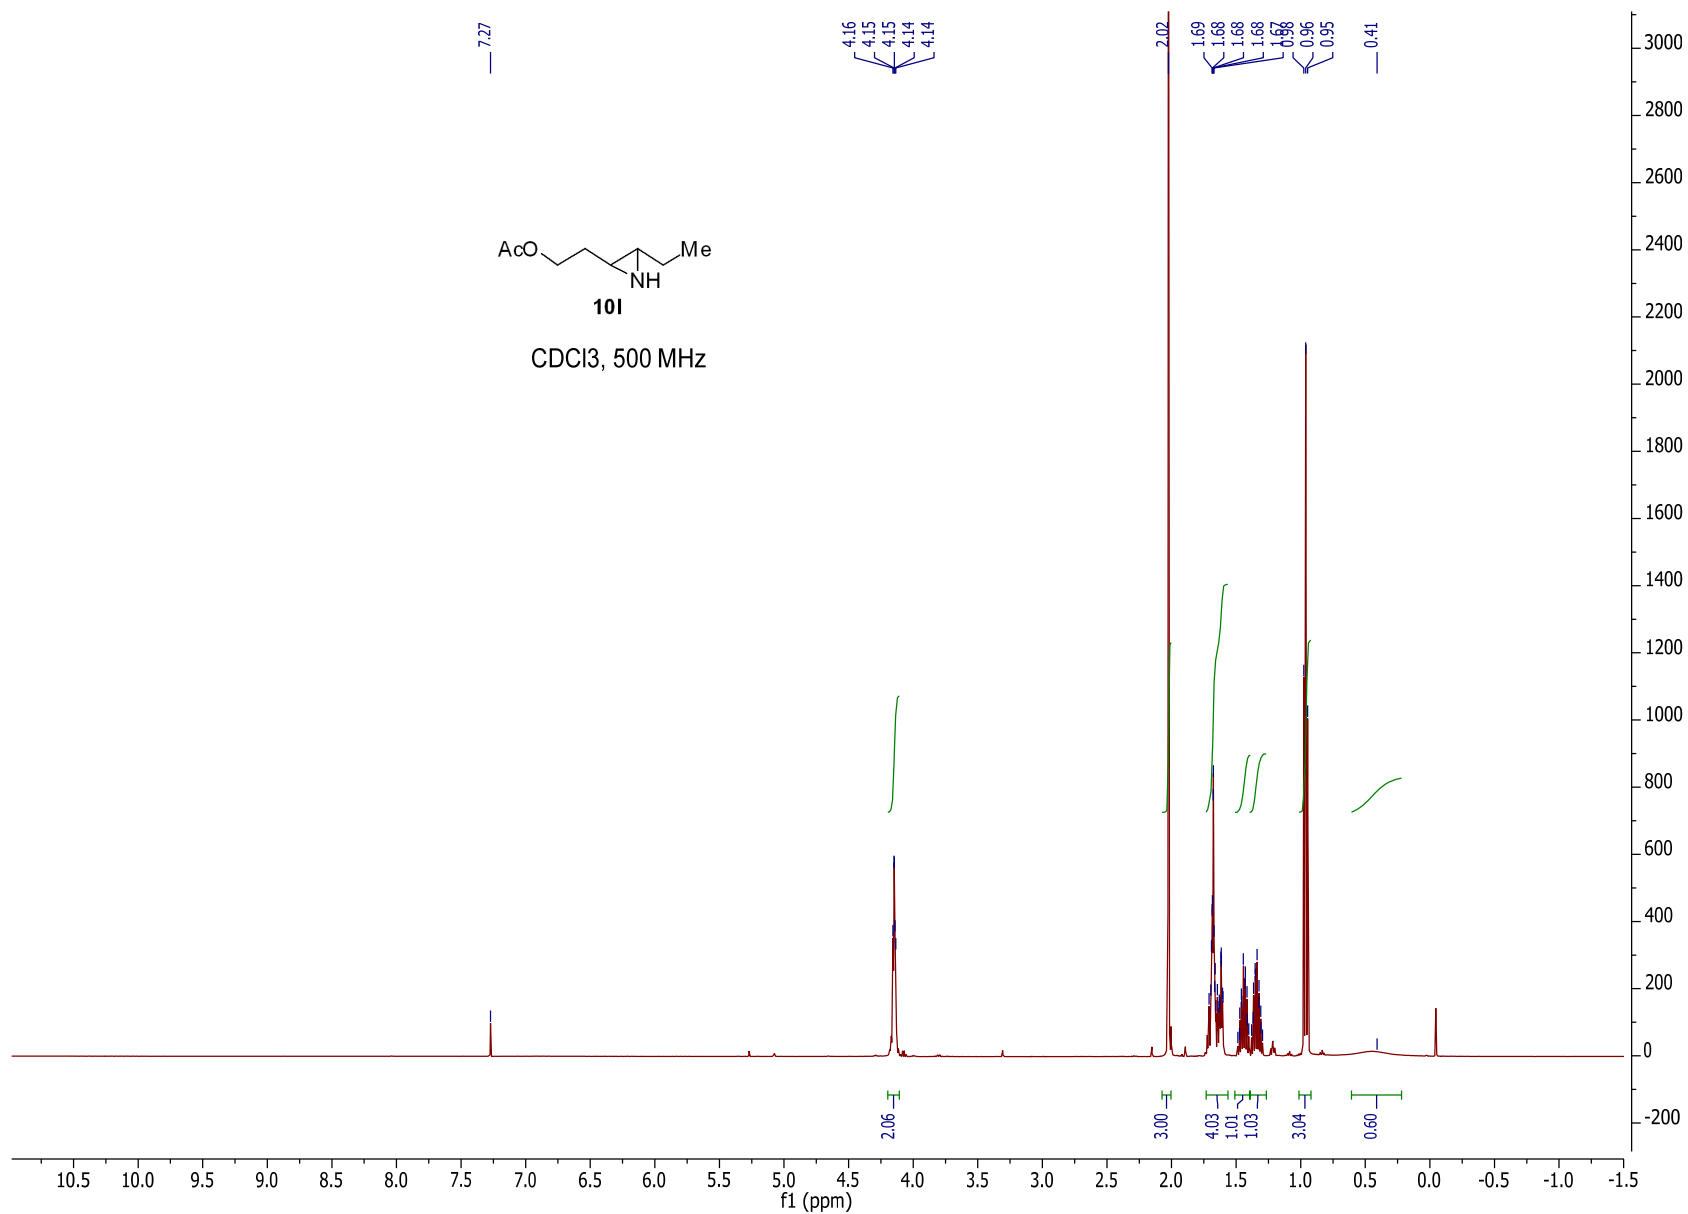

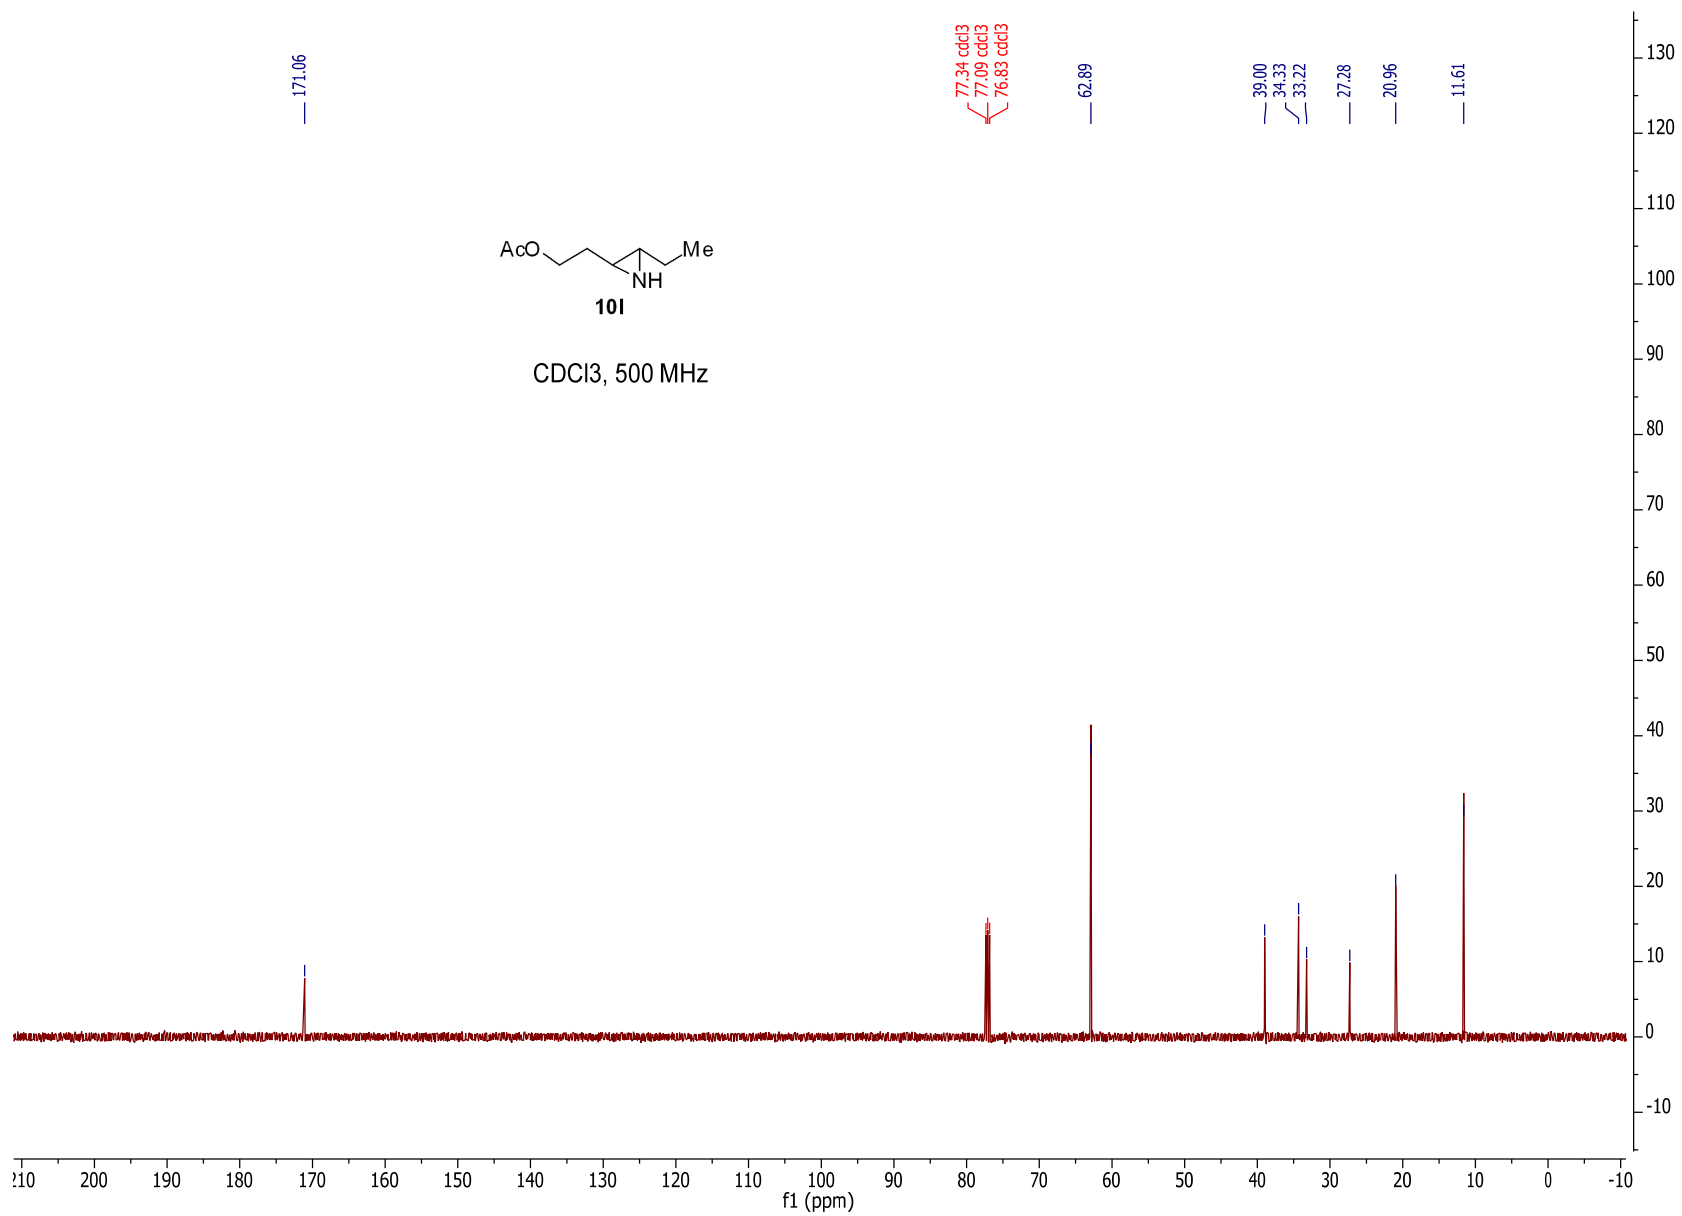

SI-143

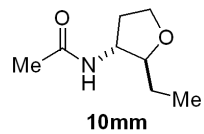

CDCl<sub>3</sub>, 400 MHz

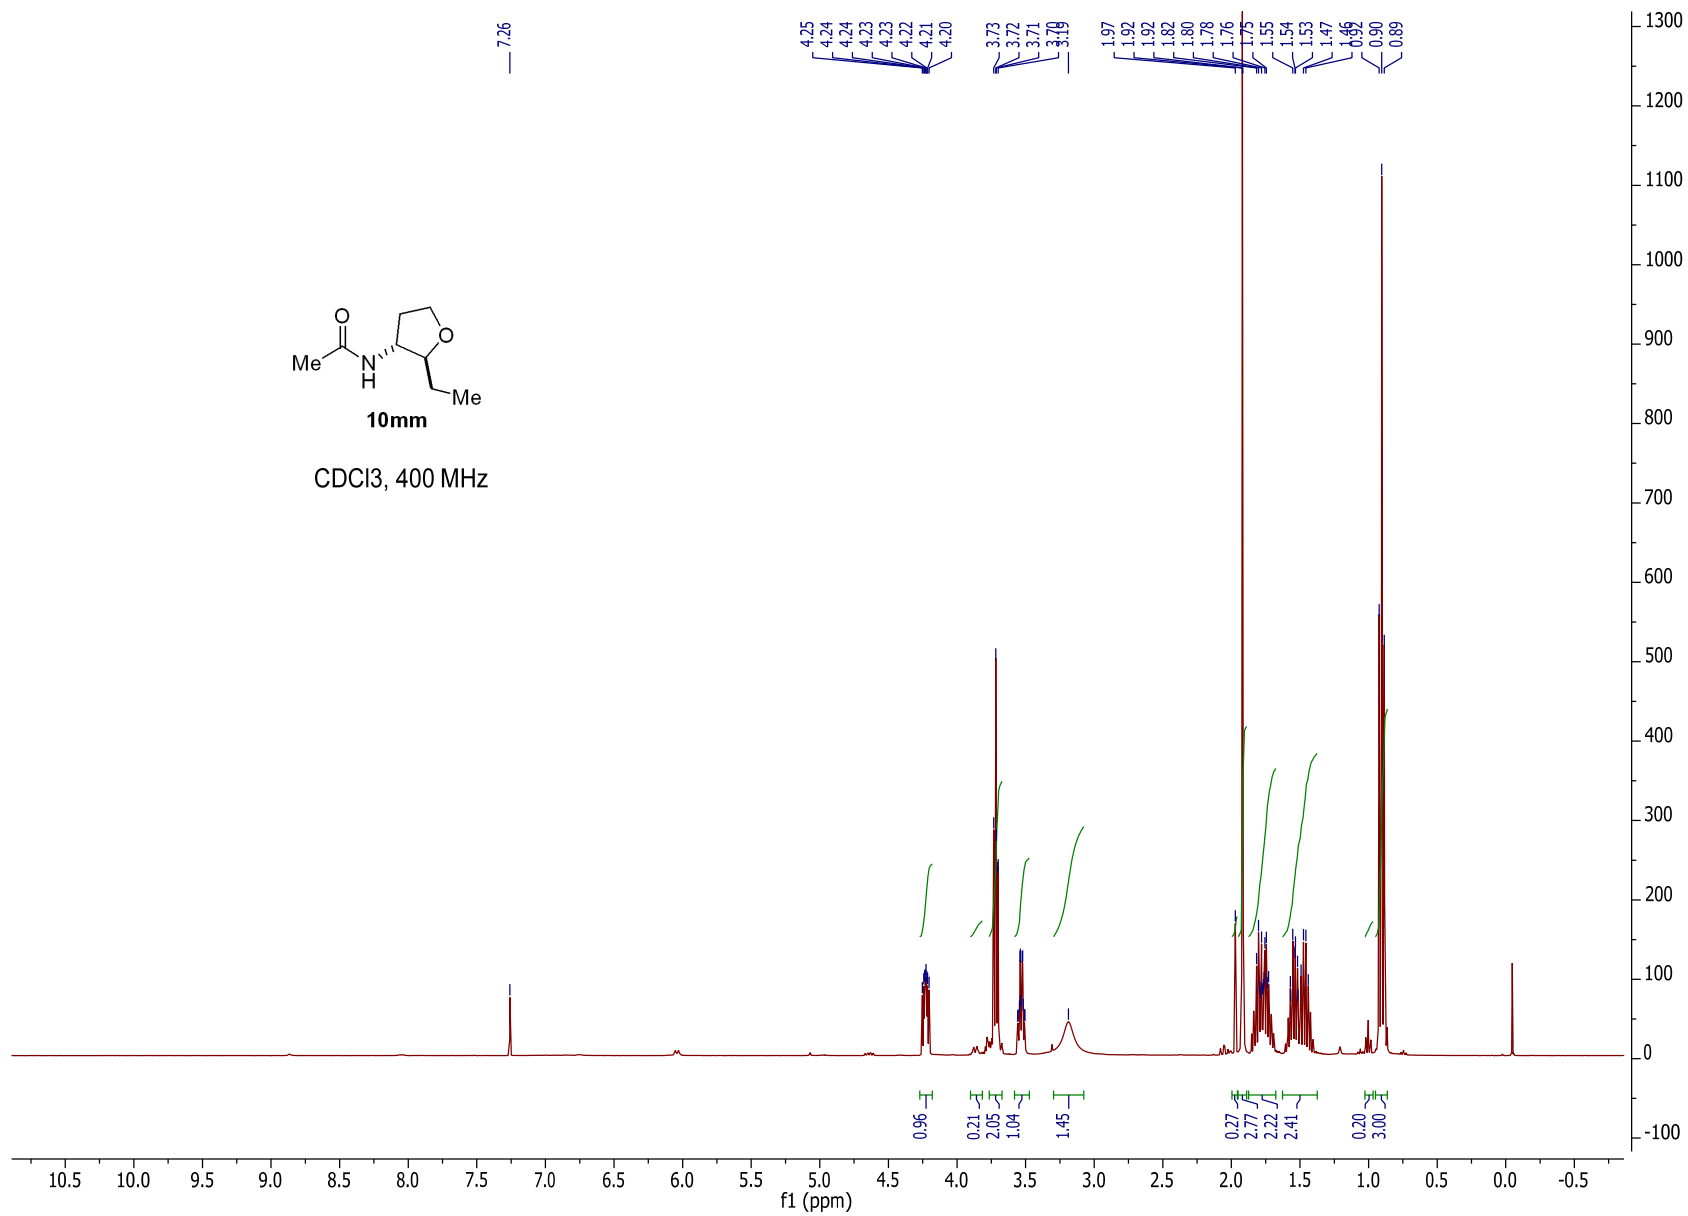



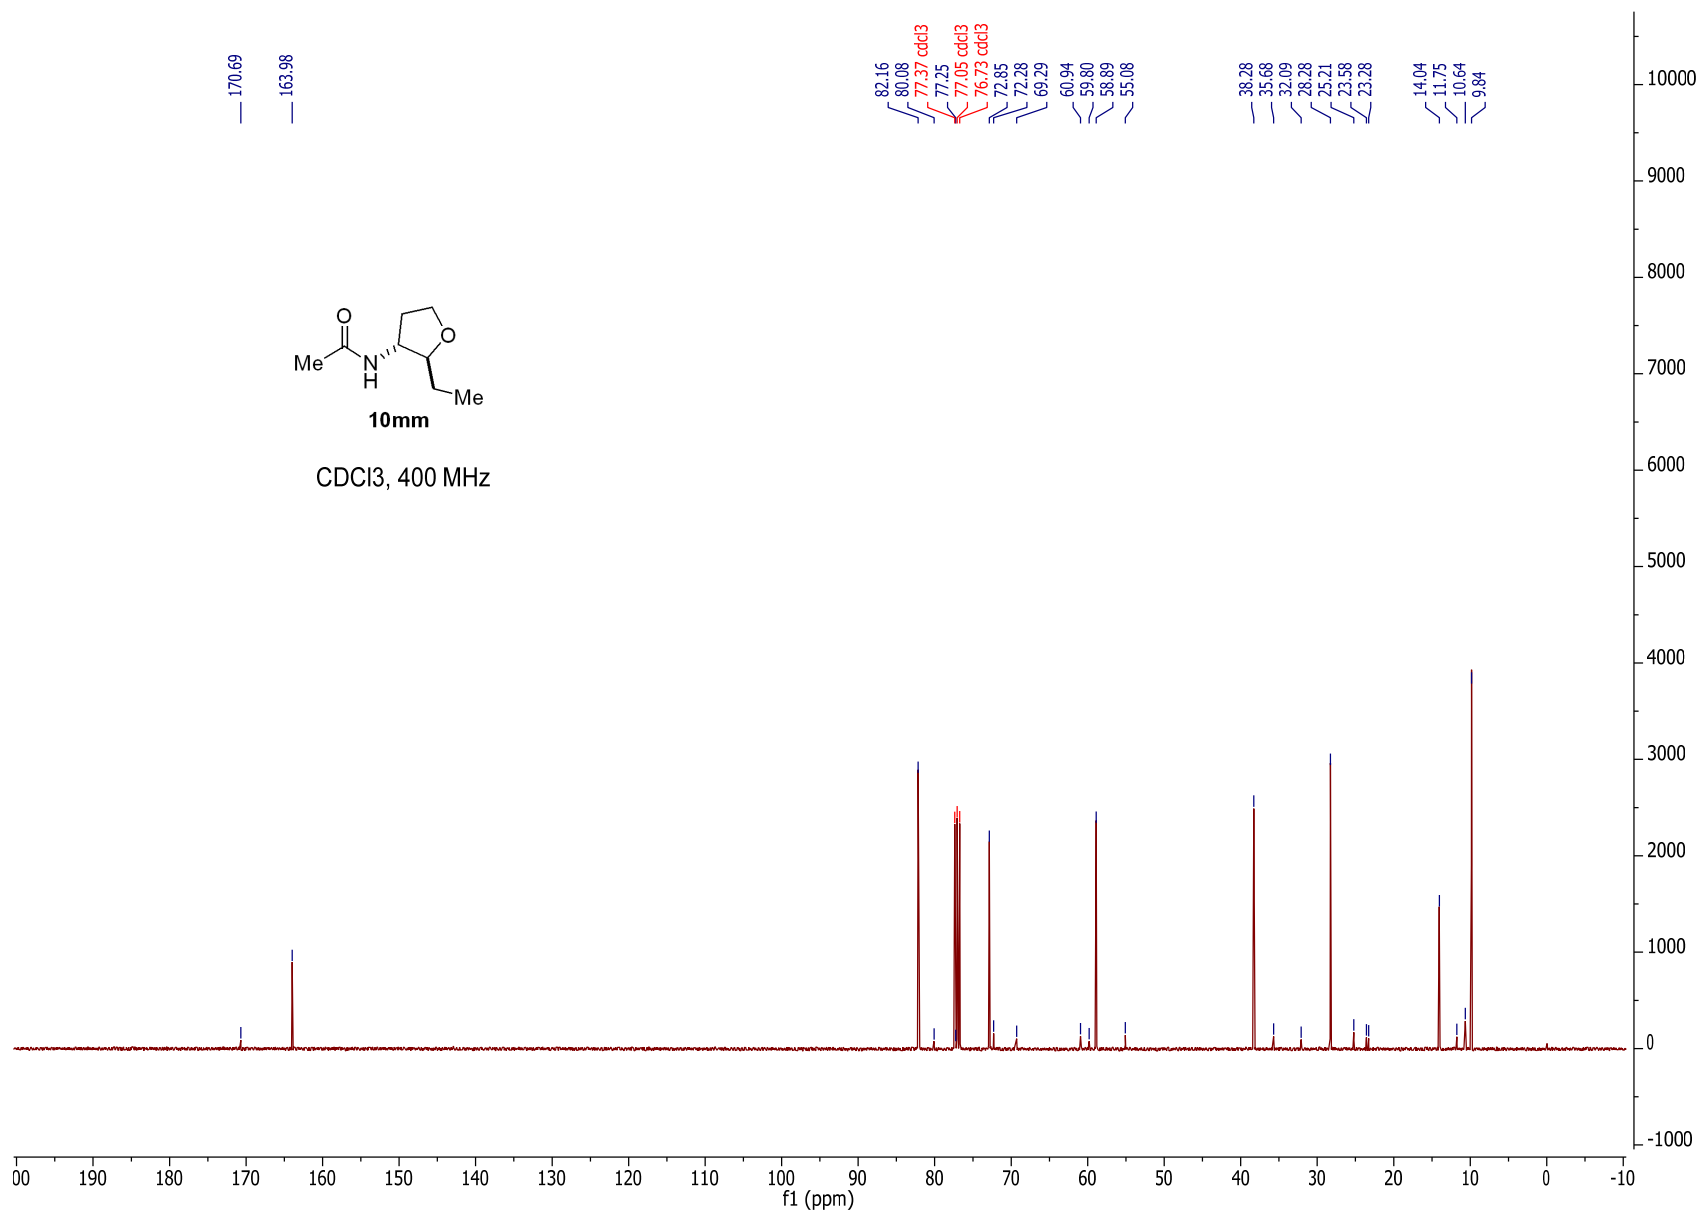

SI-145

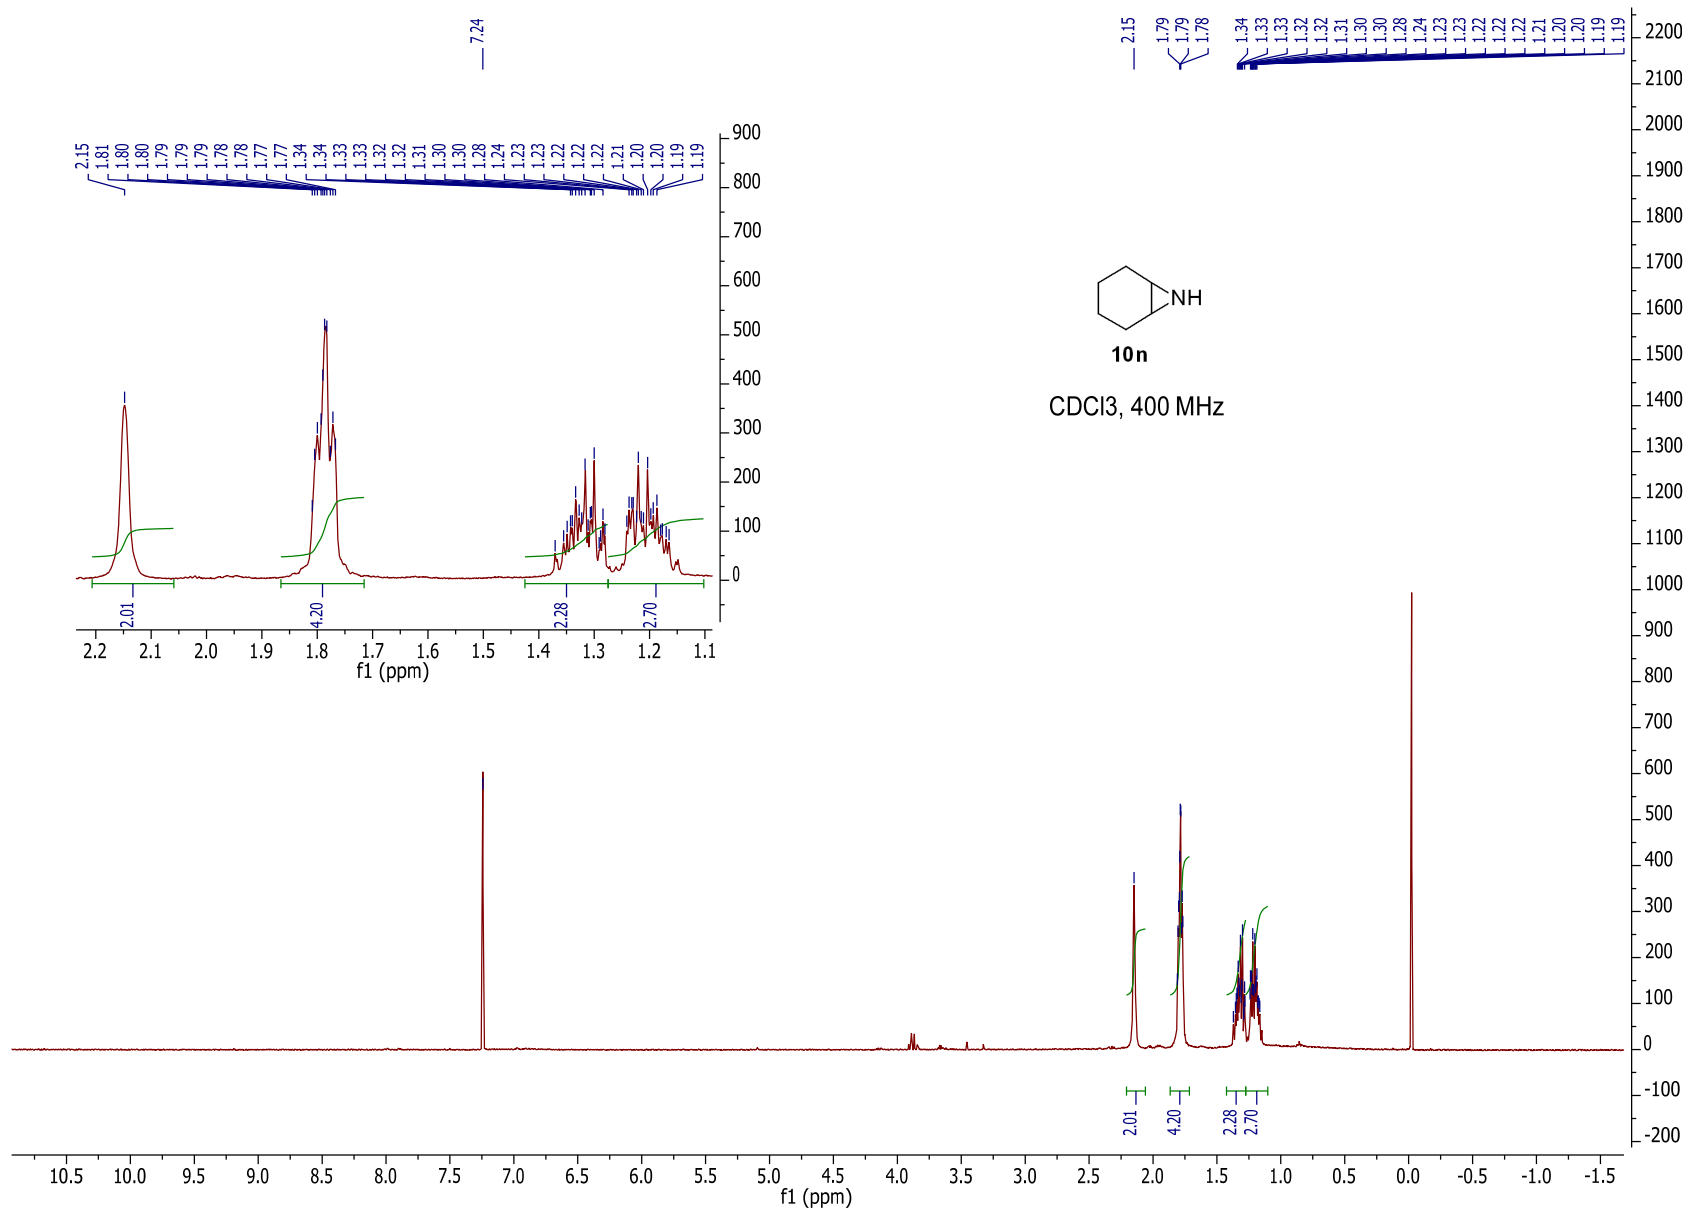

SI-146

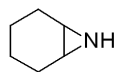

**10n**

CDCl<sub>3</sub>, 400 MHz

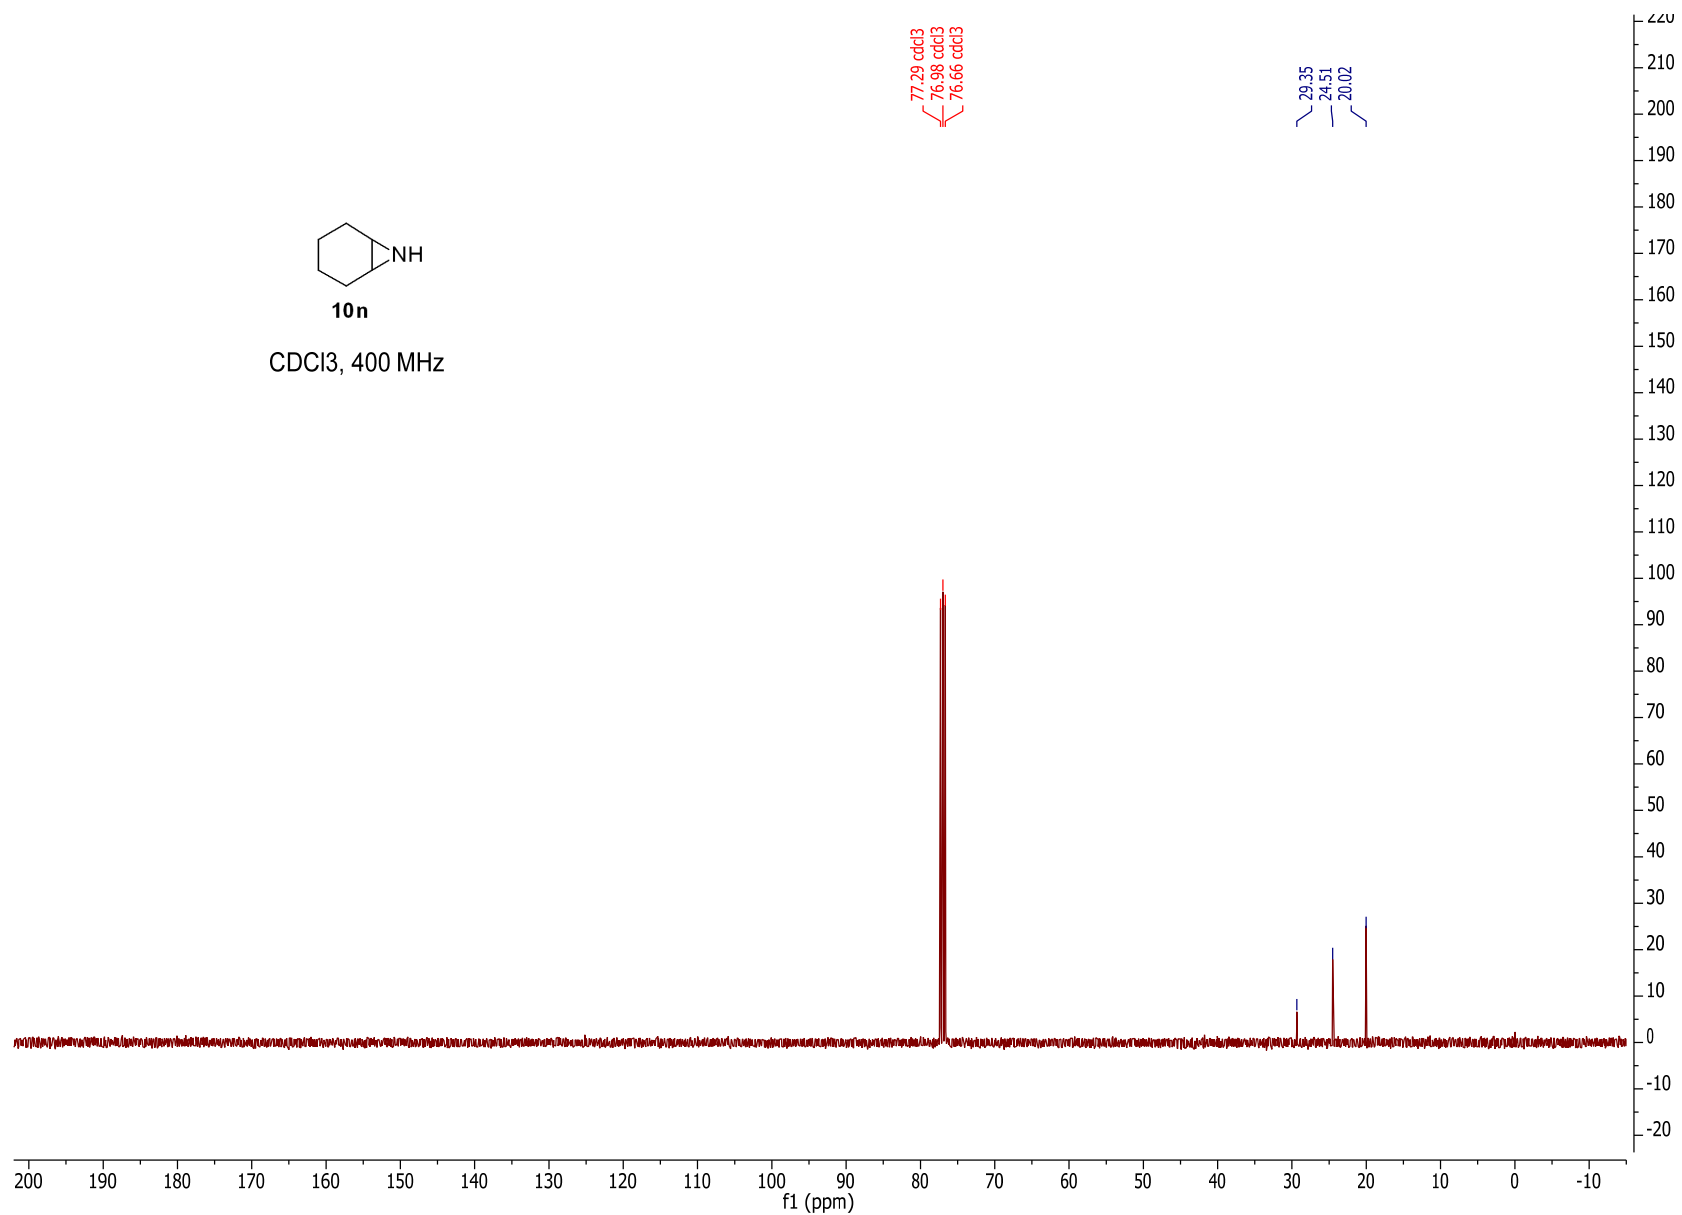

SI-147

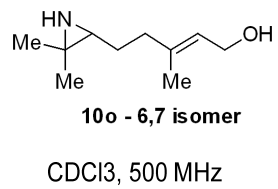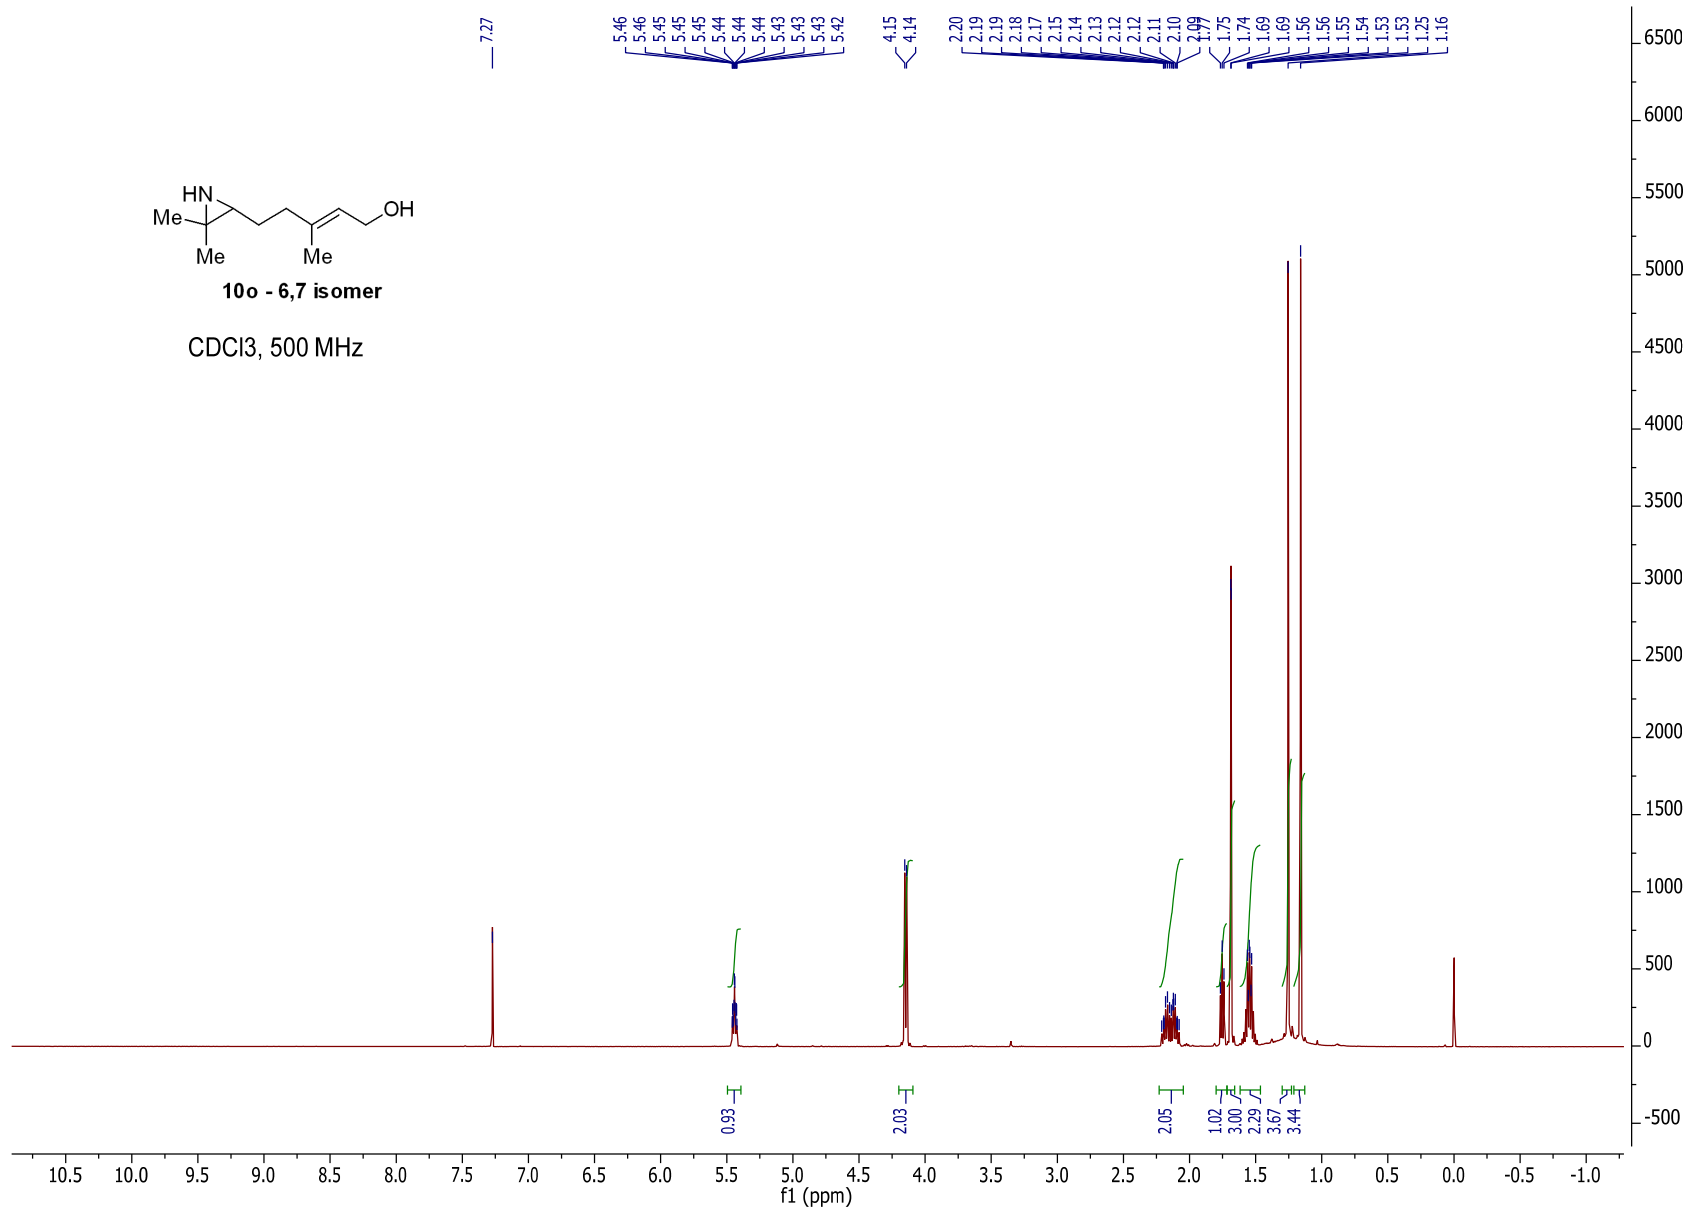

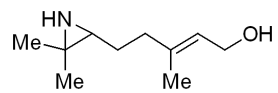

10o - 6,7 isomer

CDCl<sub>3</sub>, 500 MHz

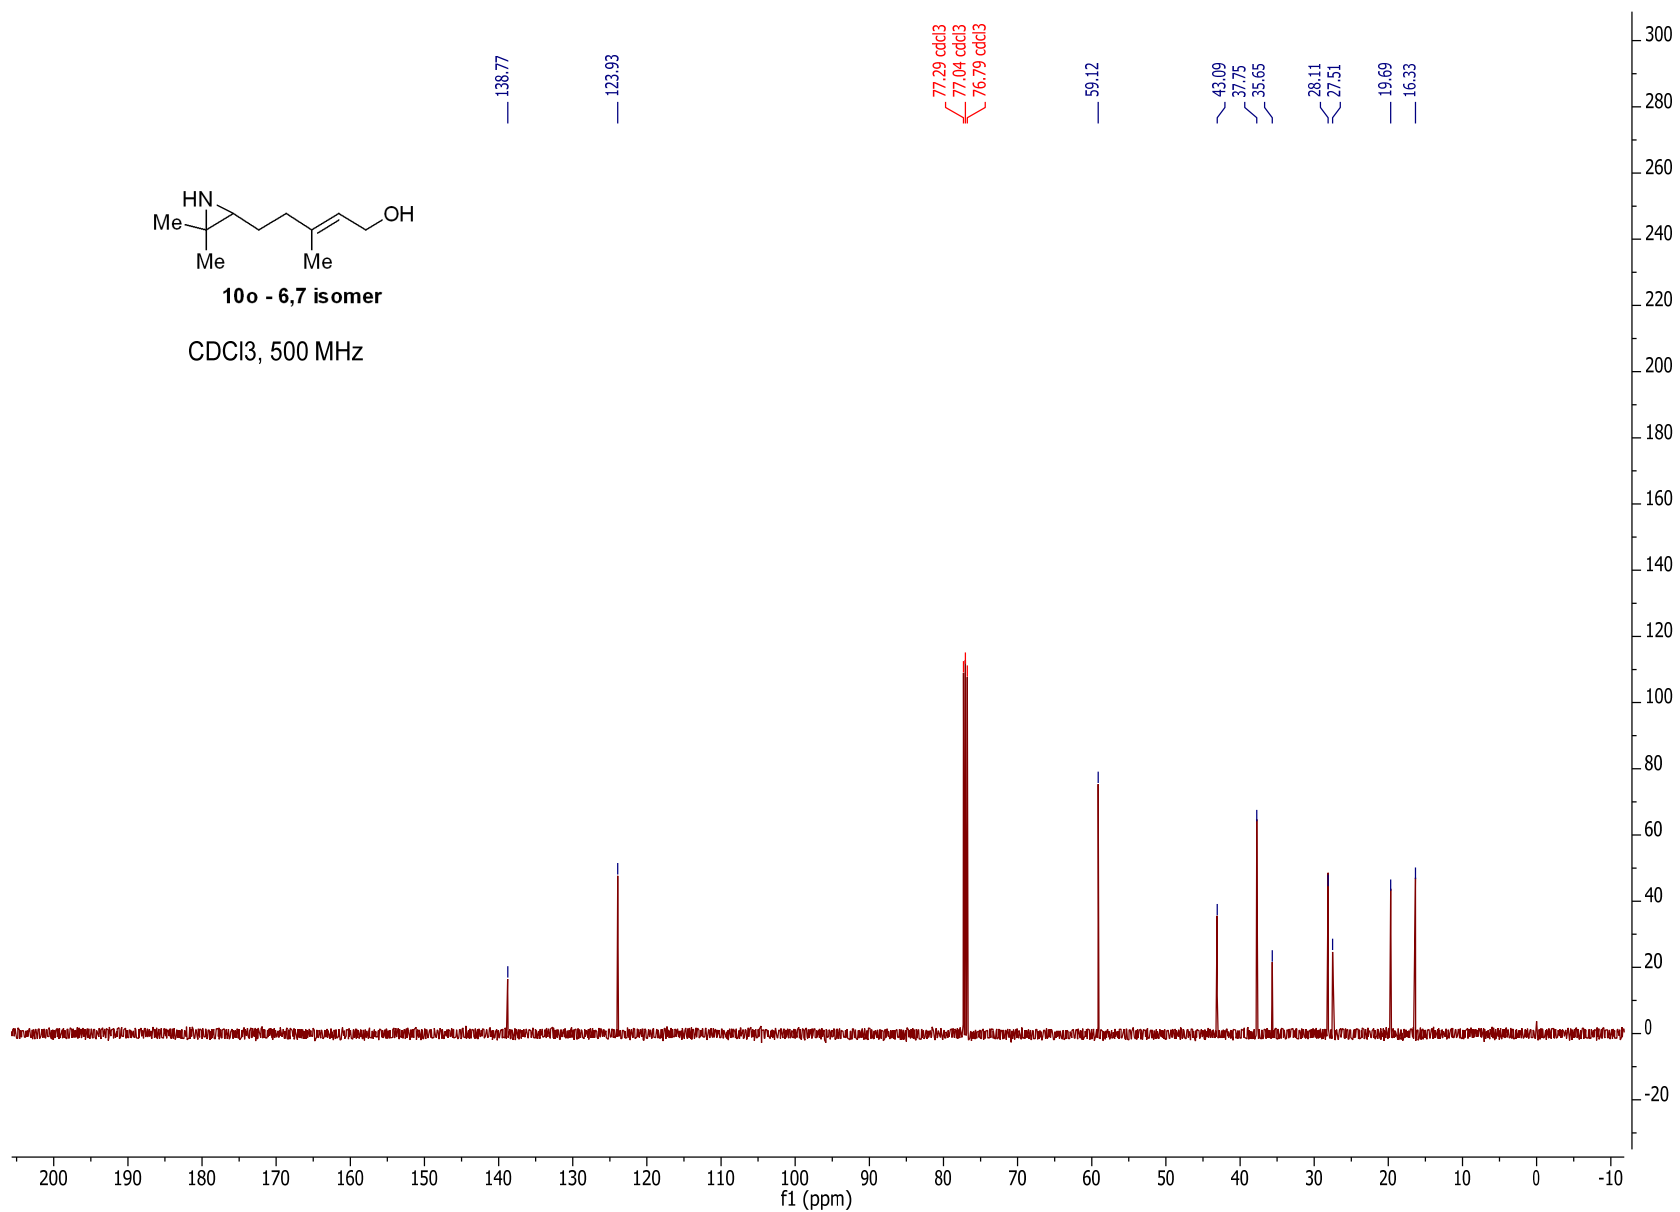

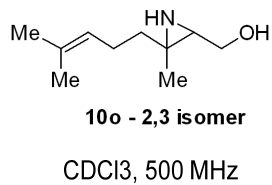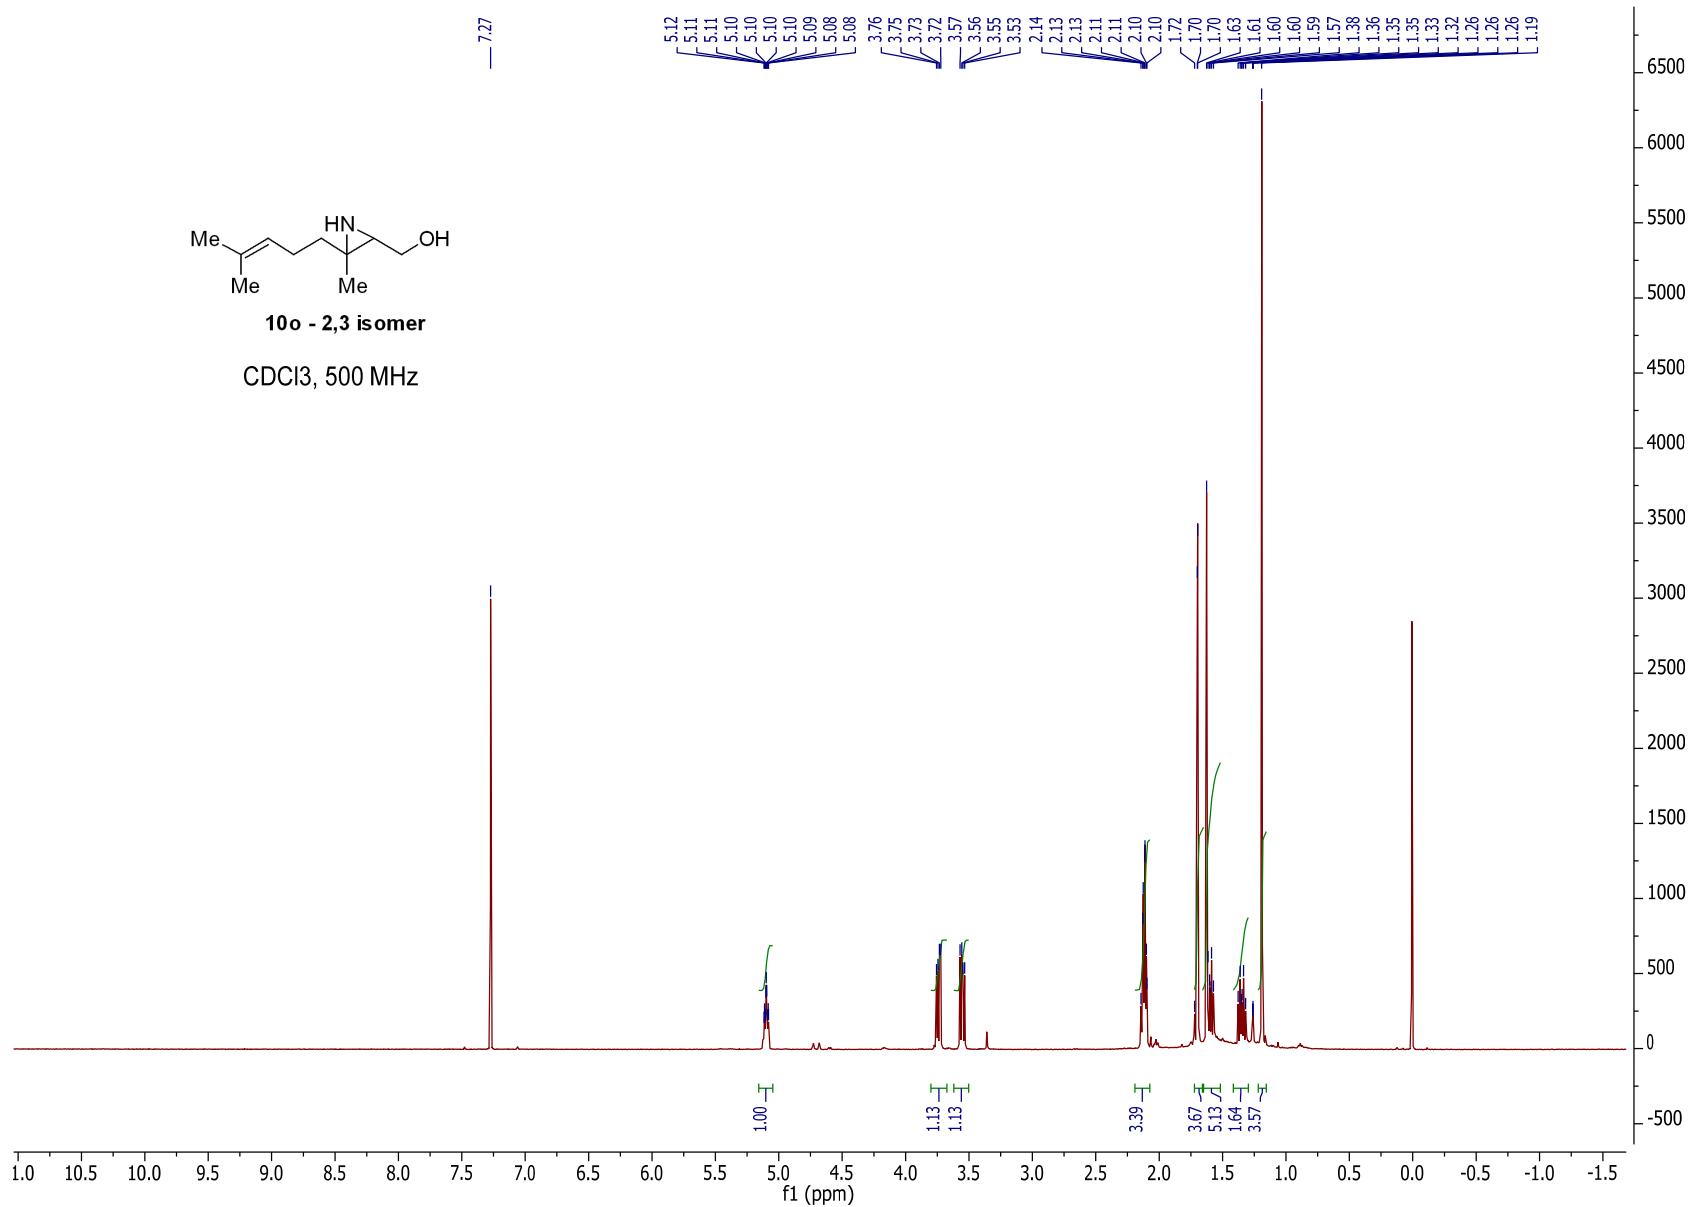

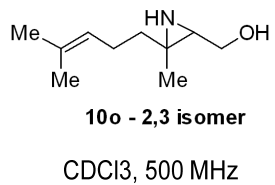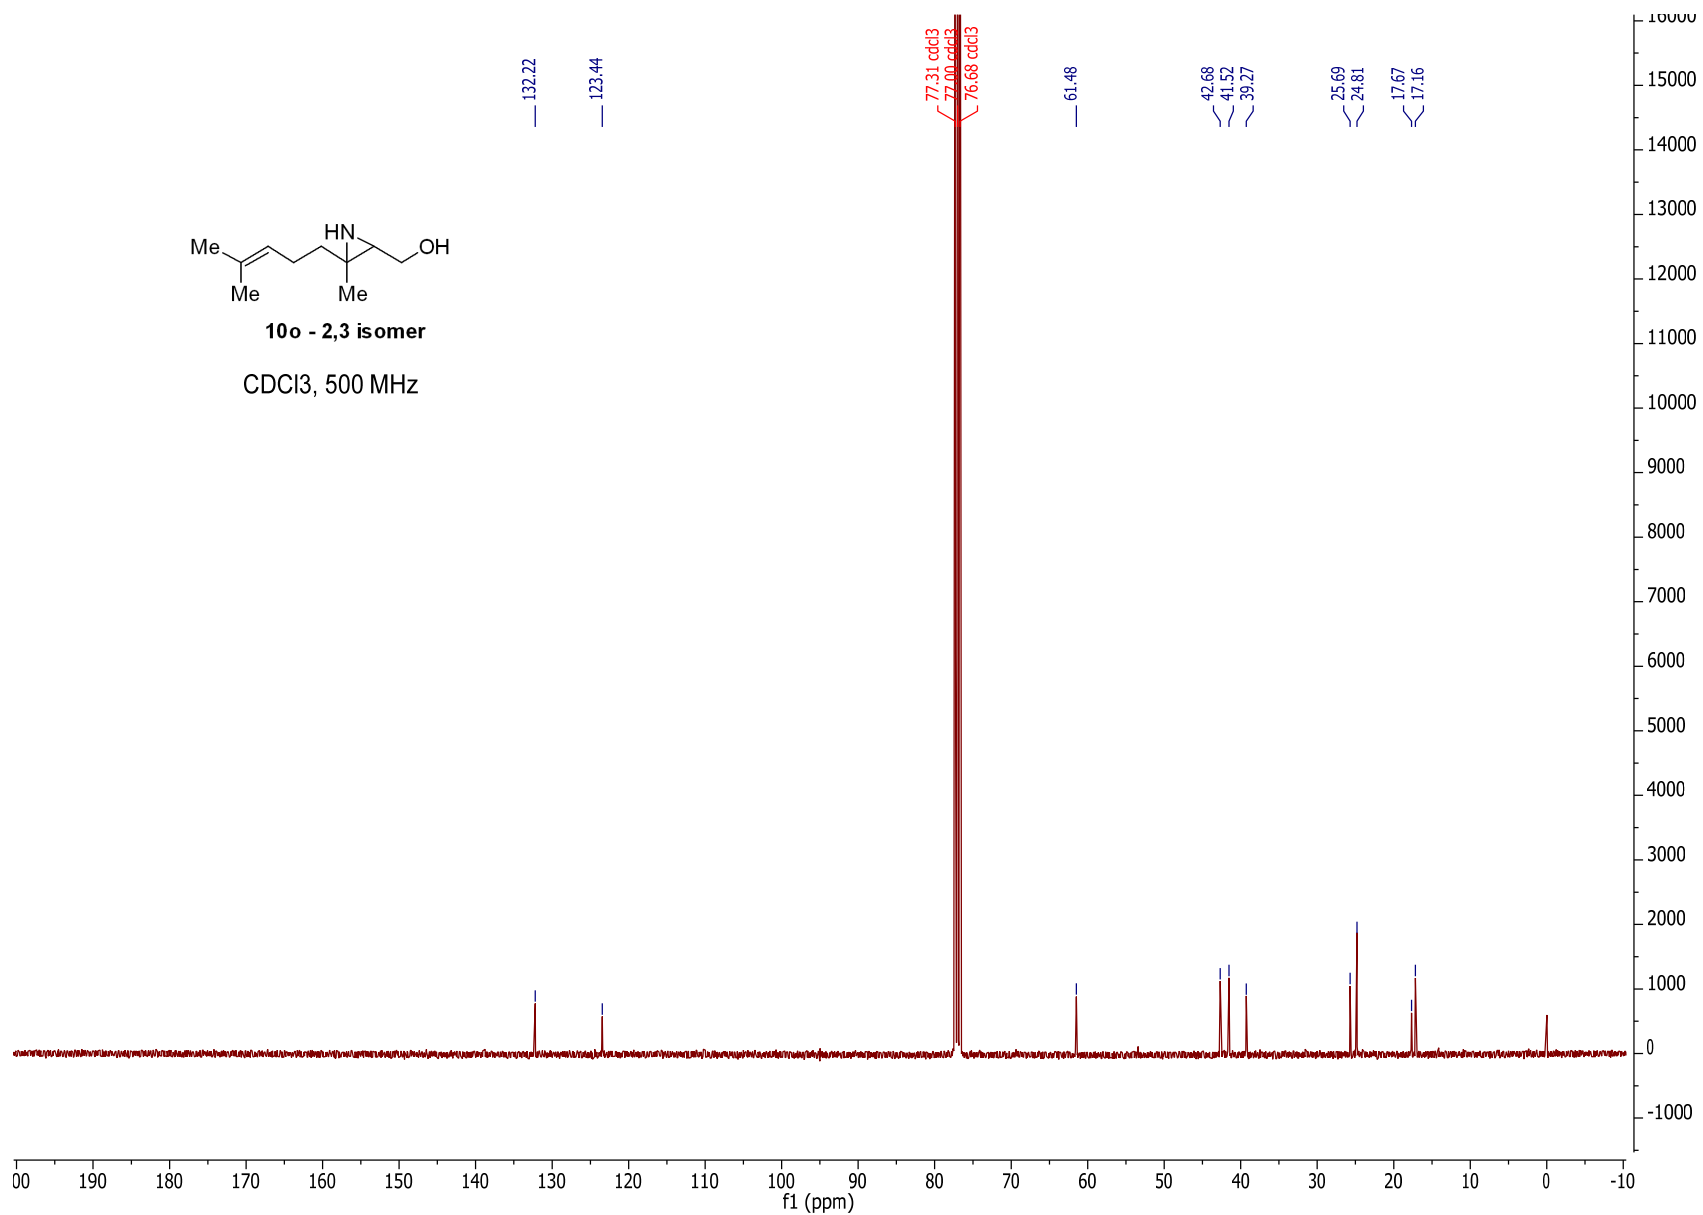

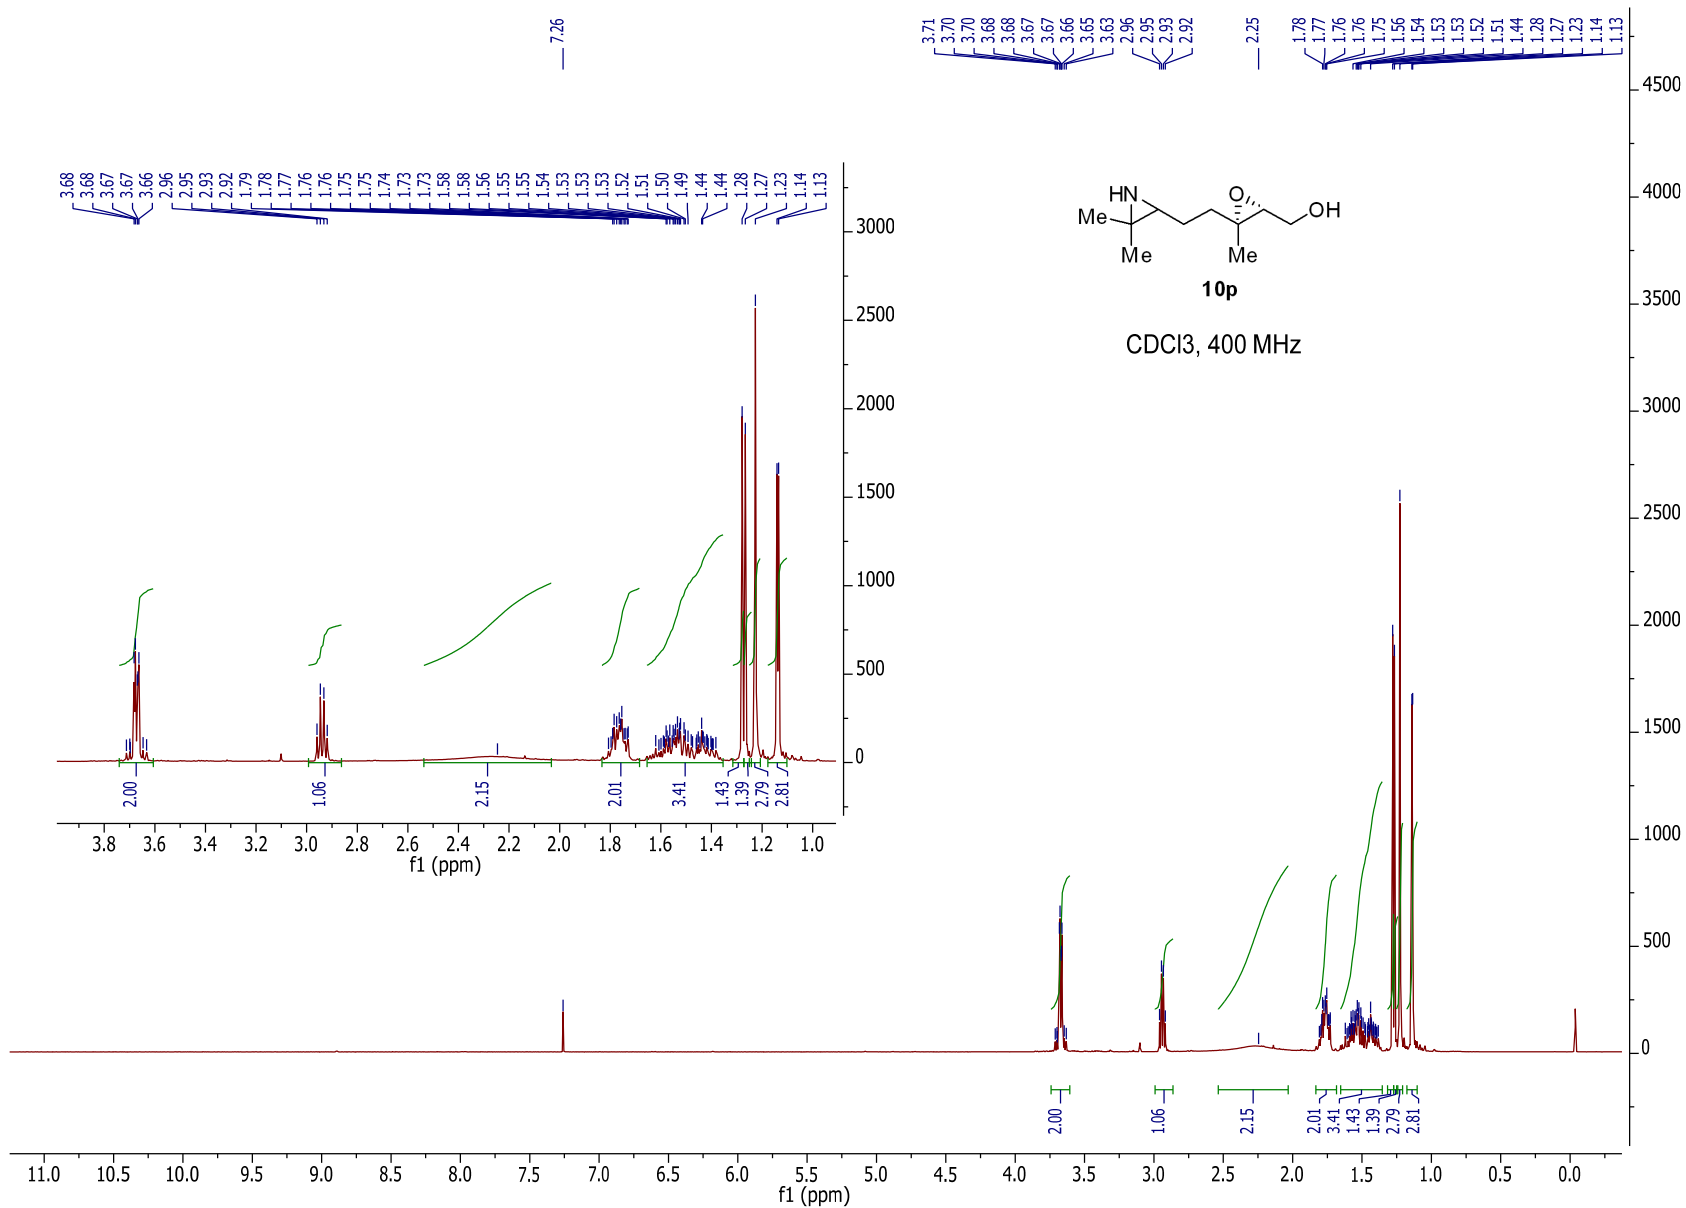



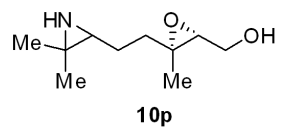

CDCl<sub>3</sub>, 400 MHz

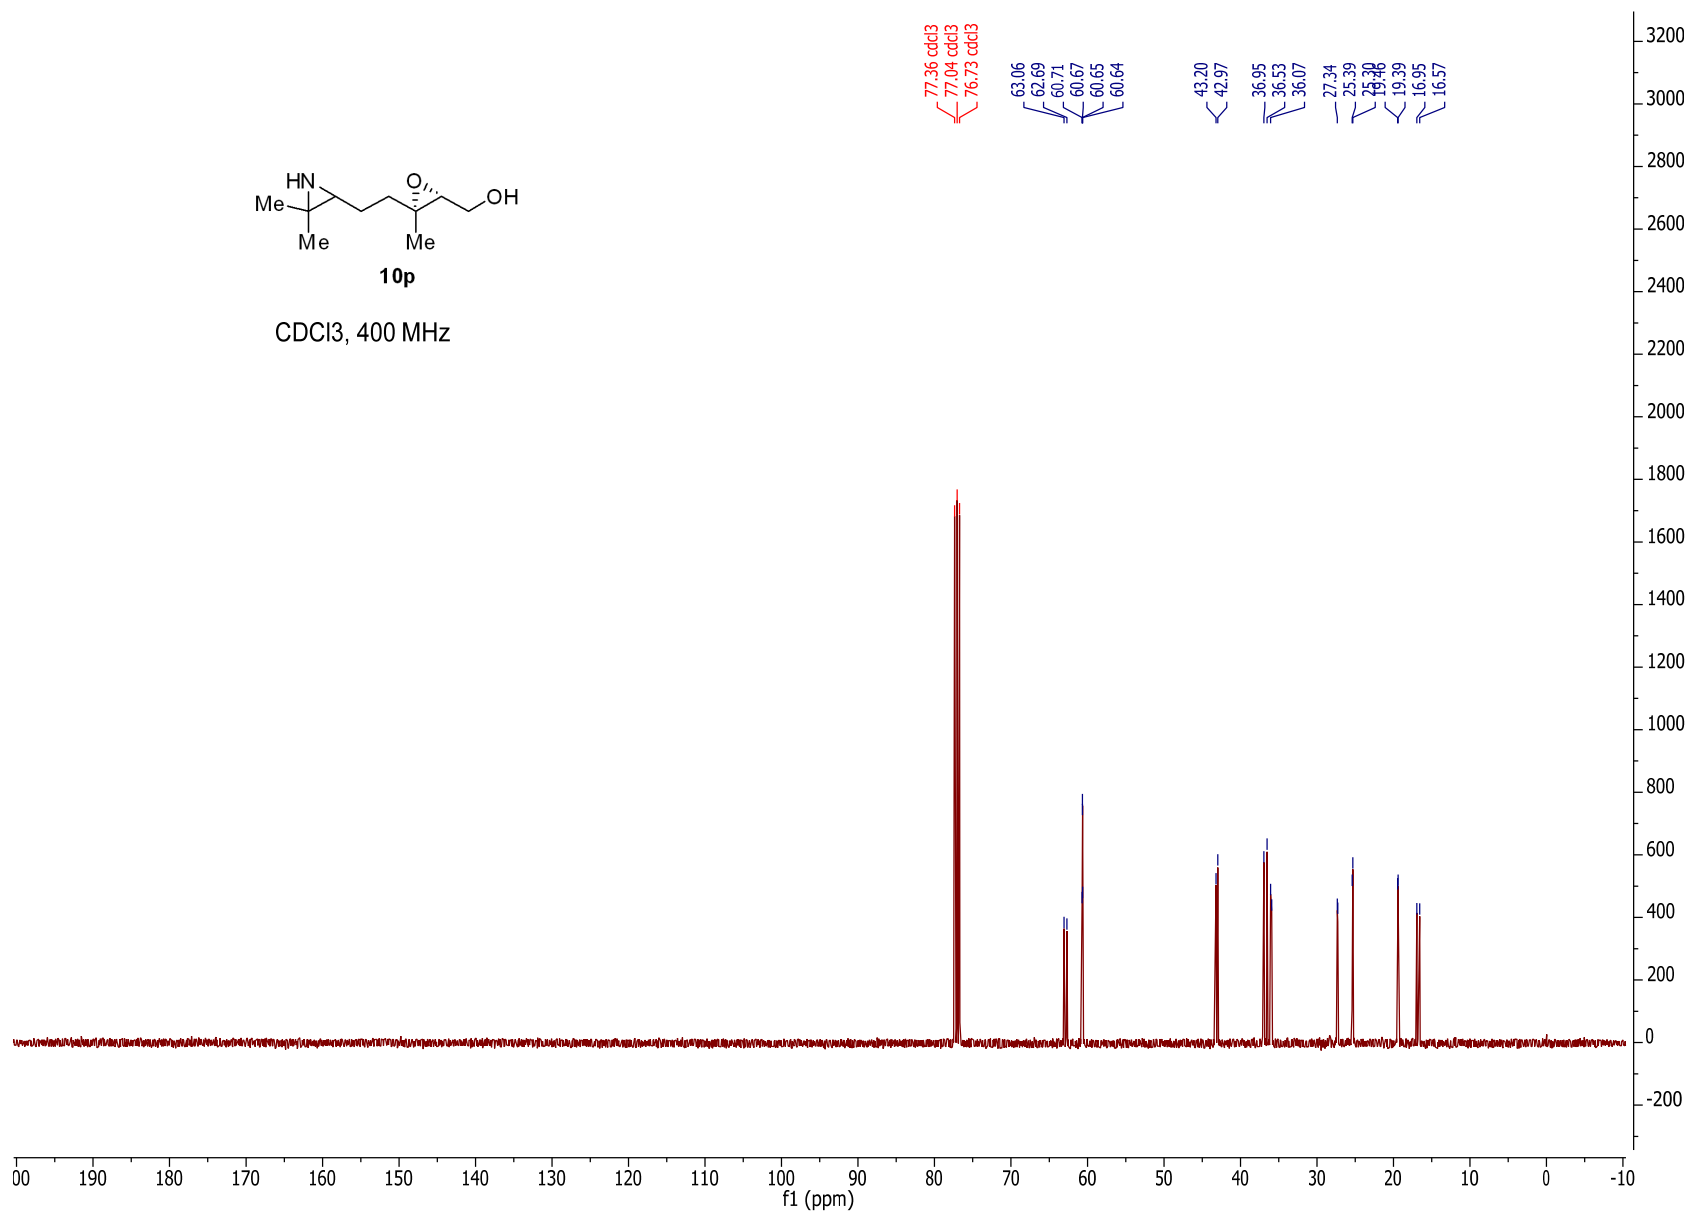

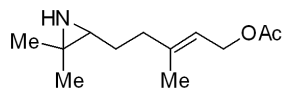

10q - 6,7 isomer

CDCl<sub>3</sub>, 500 MHz

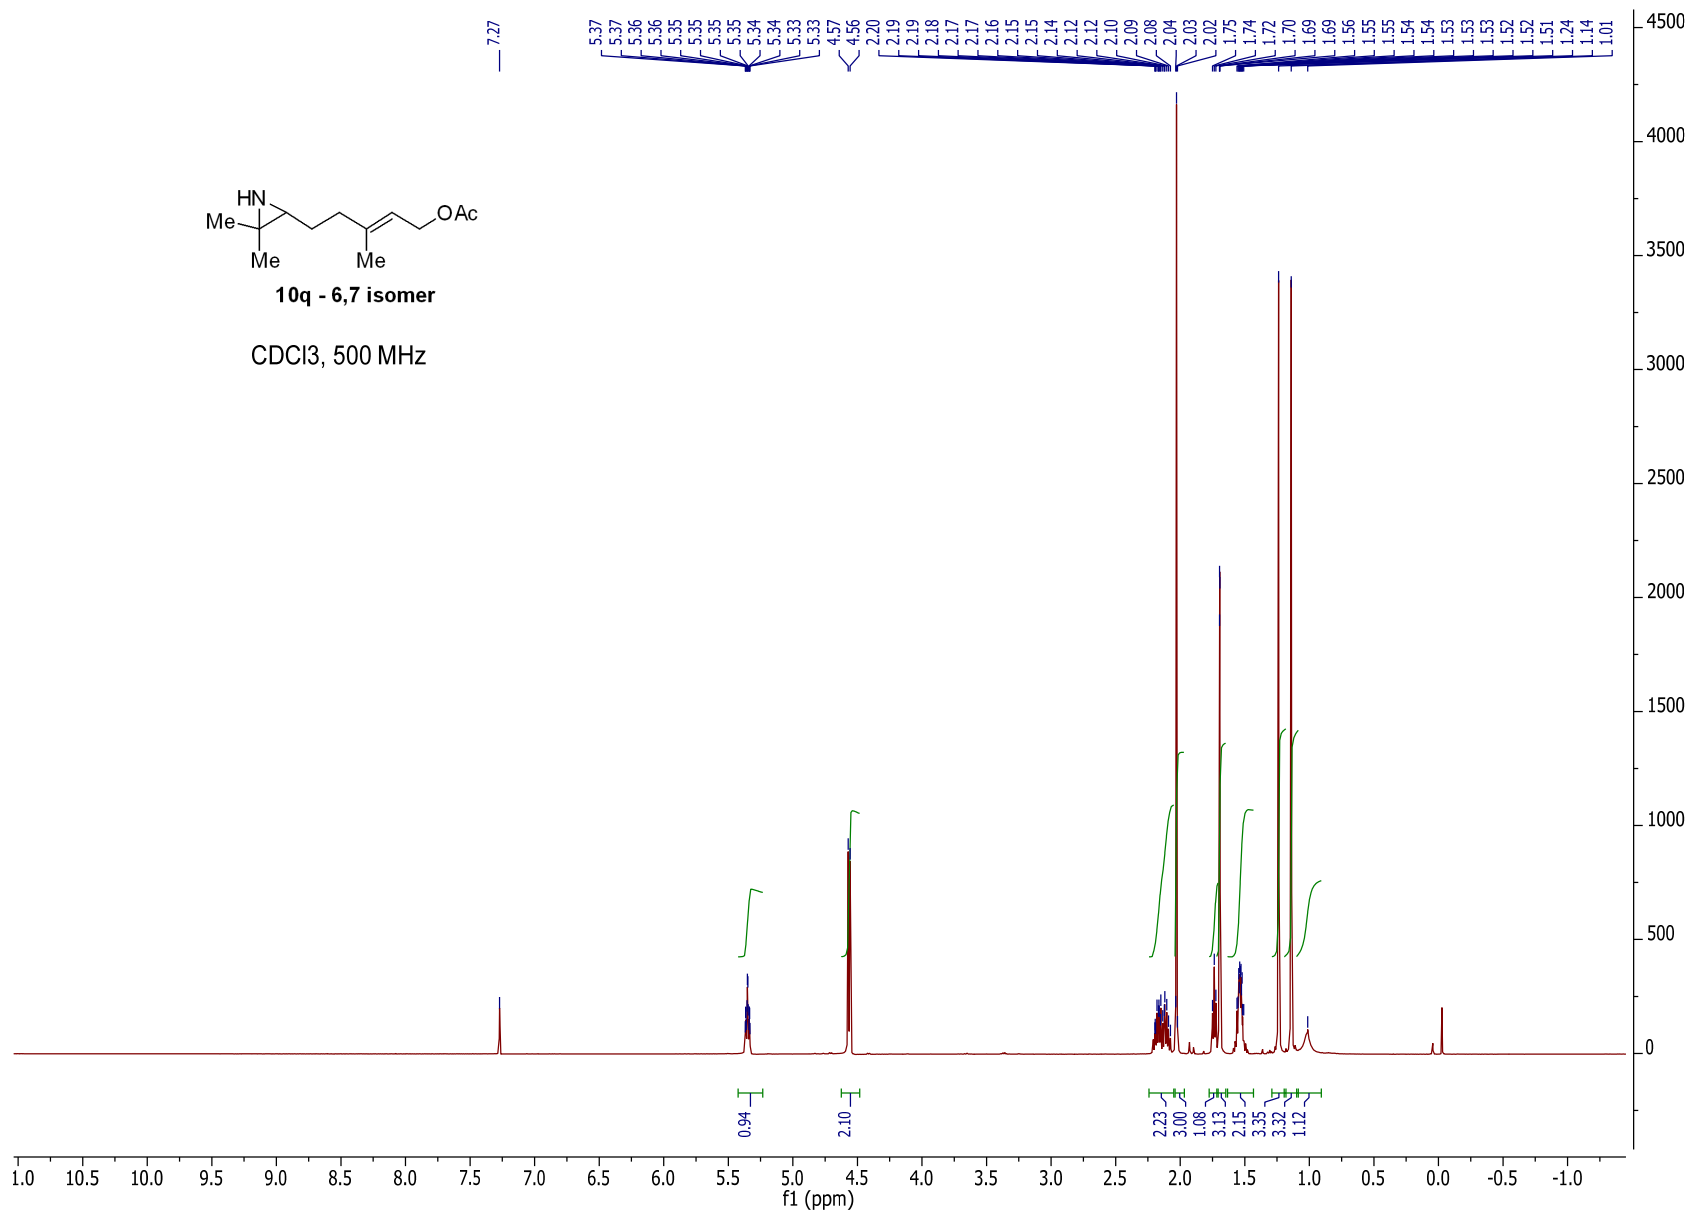

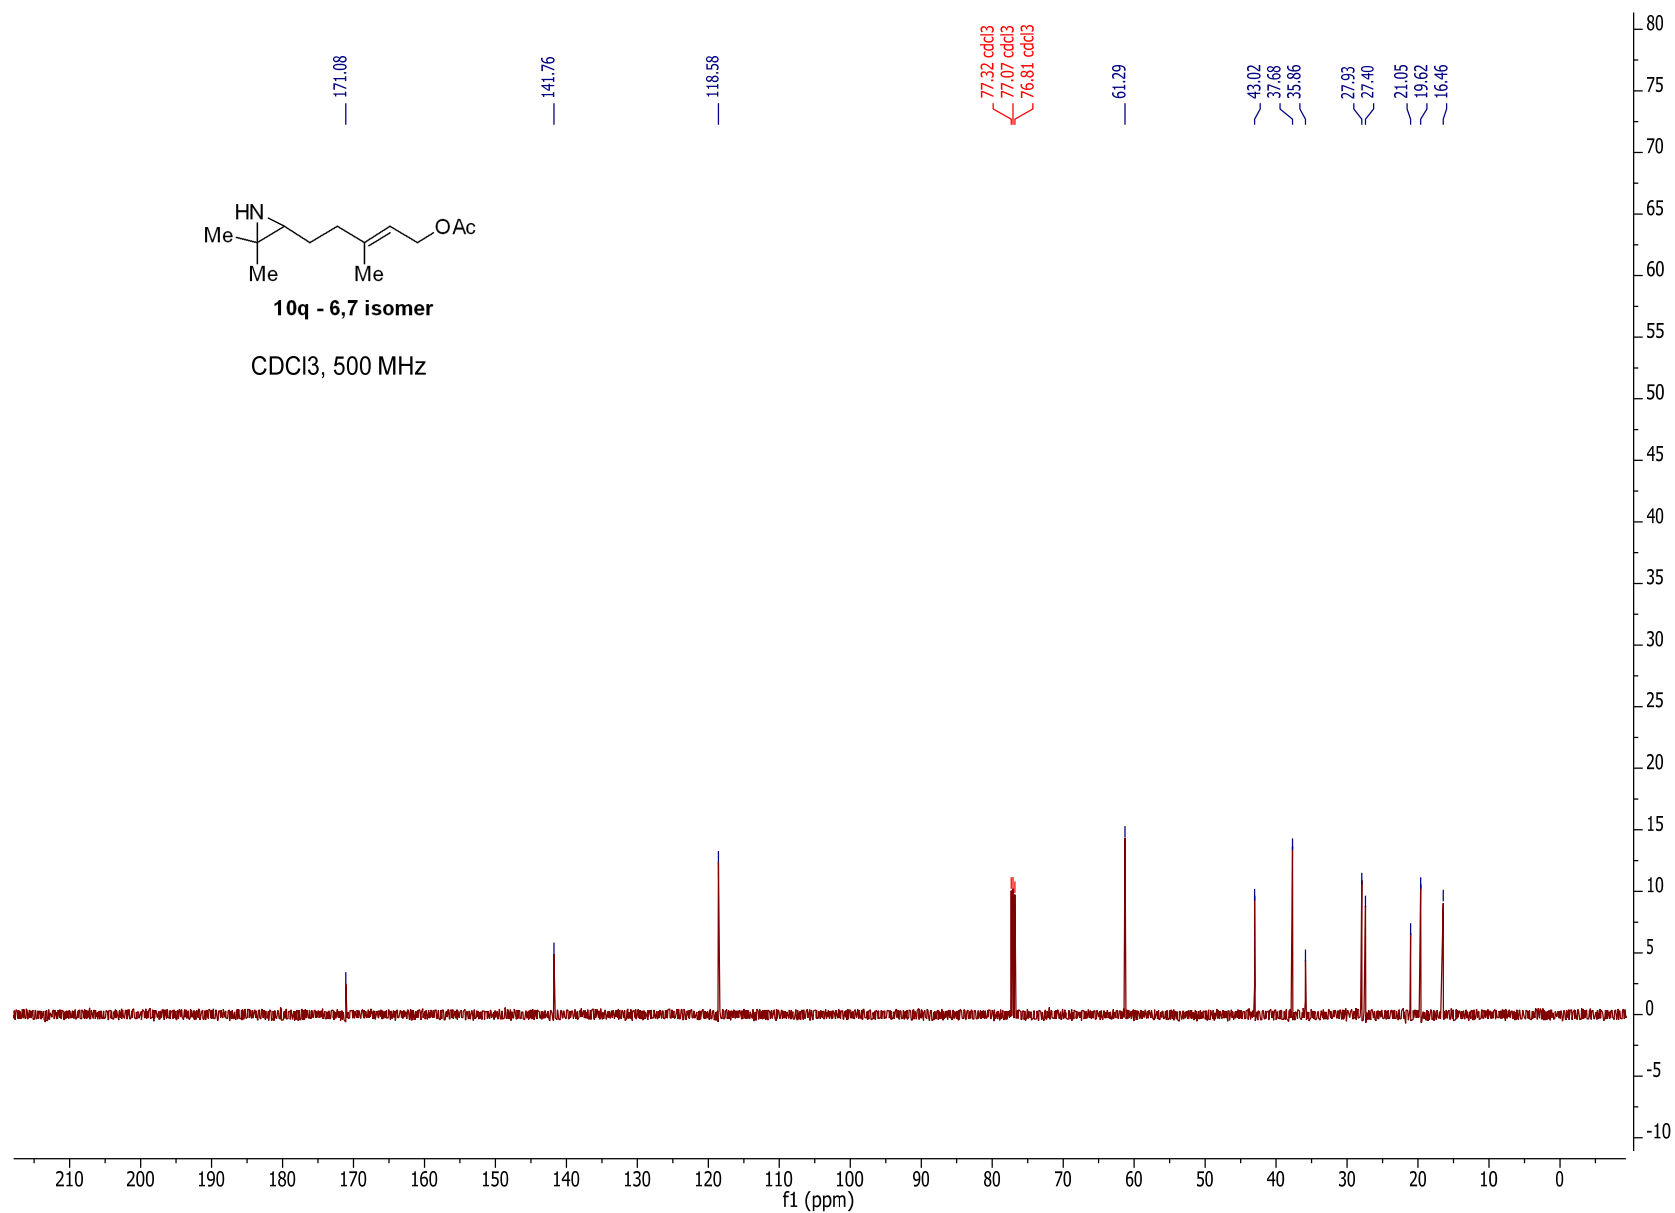

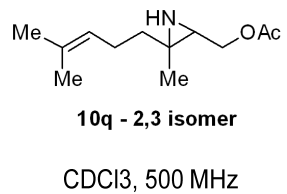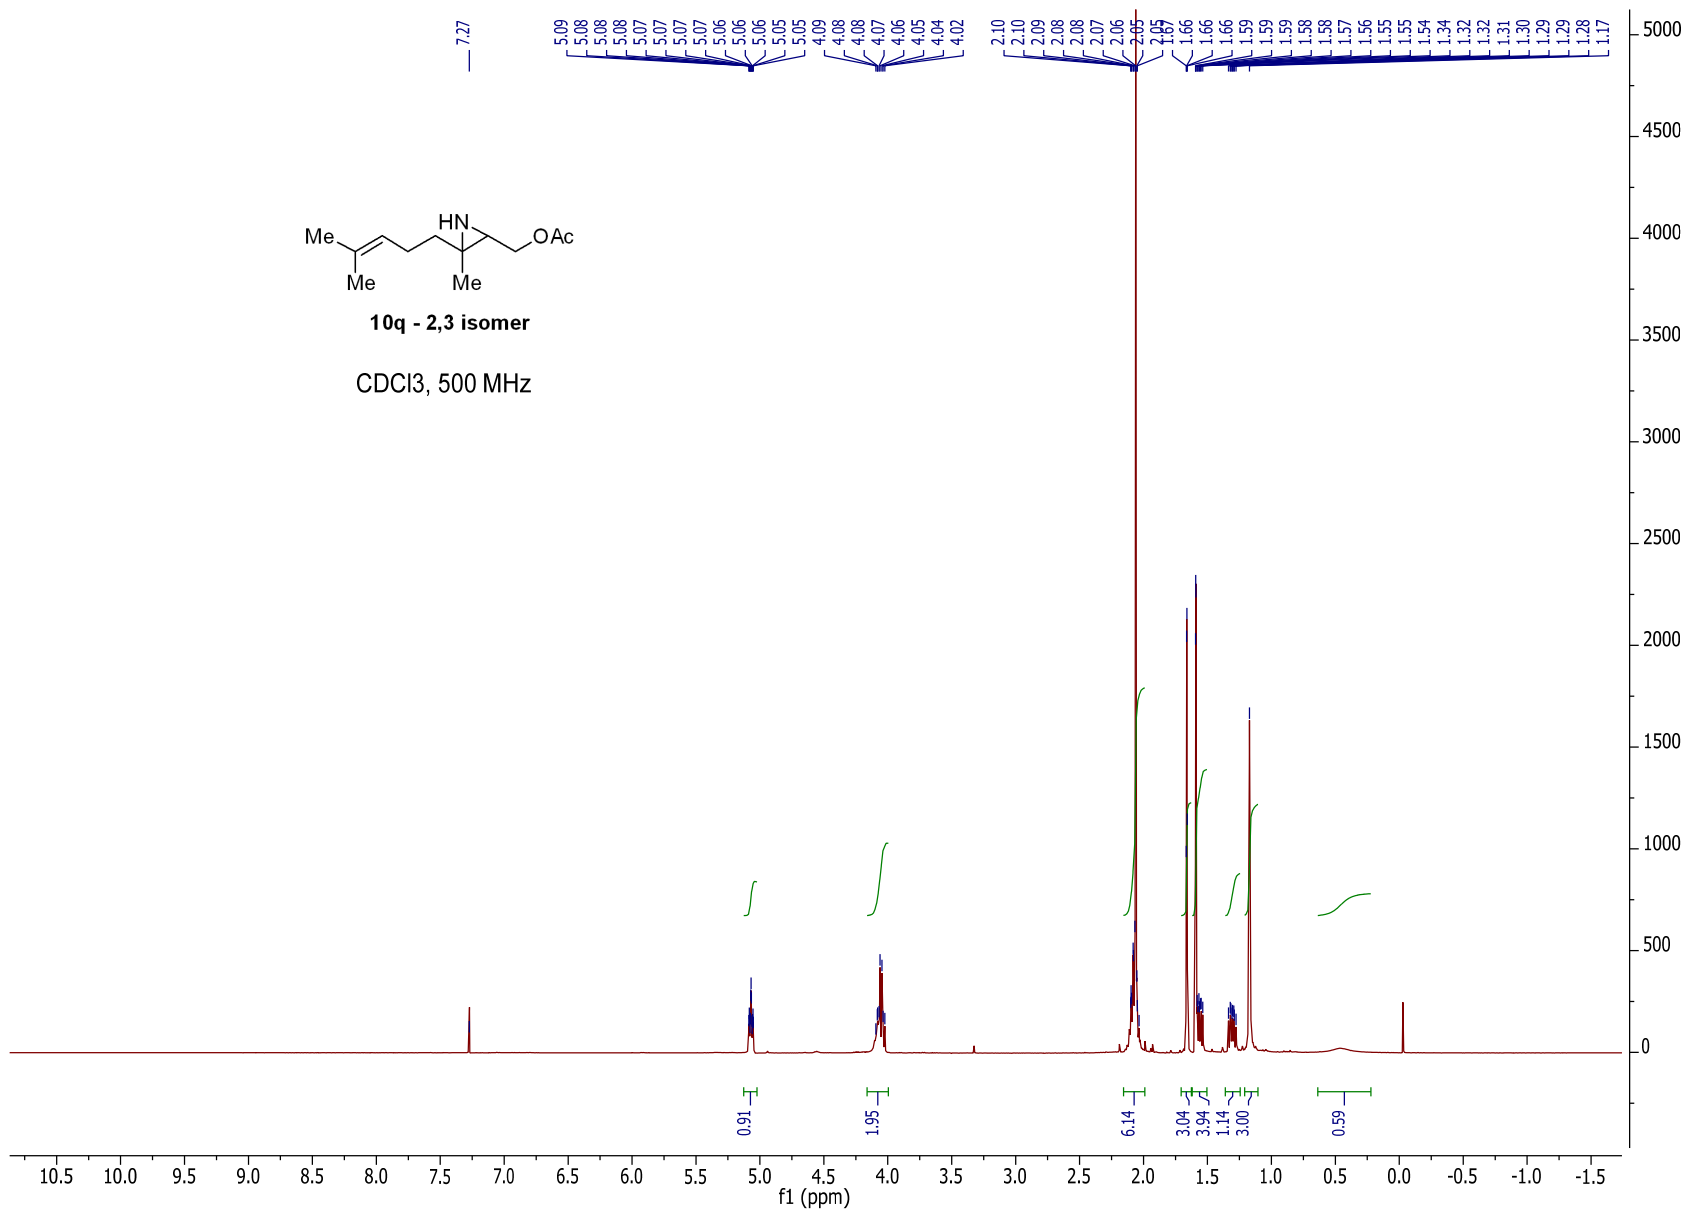

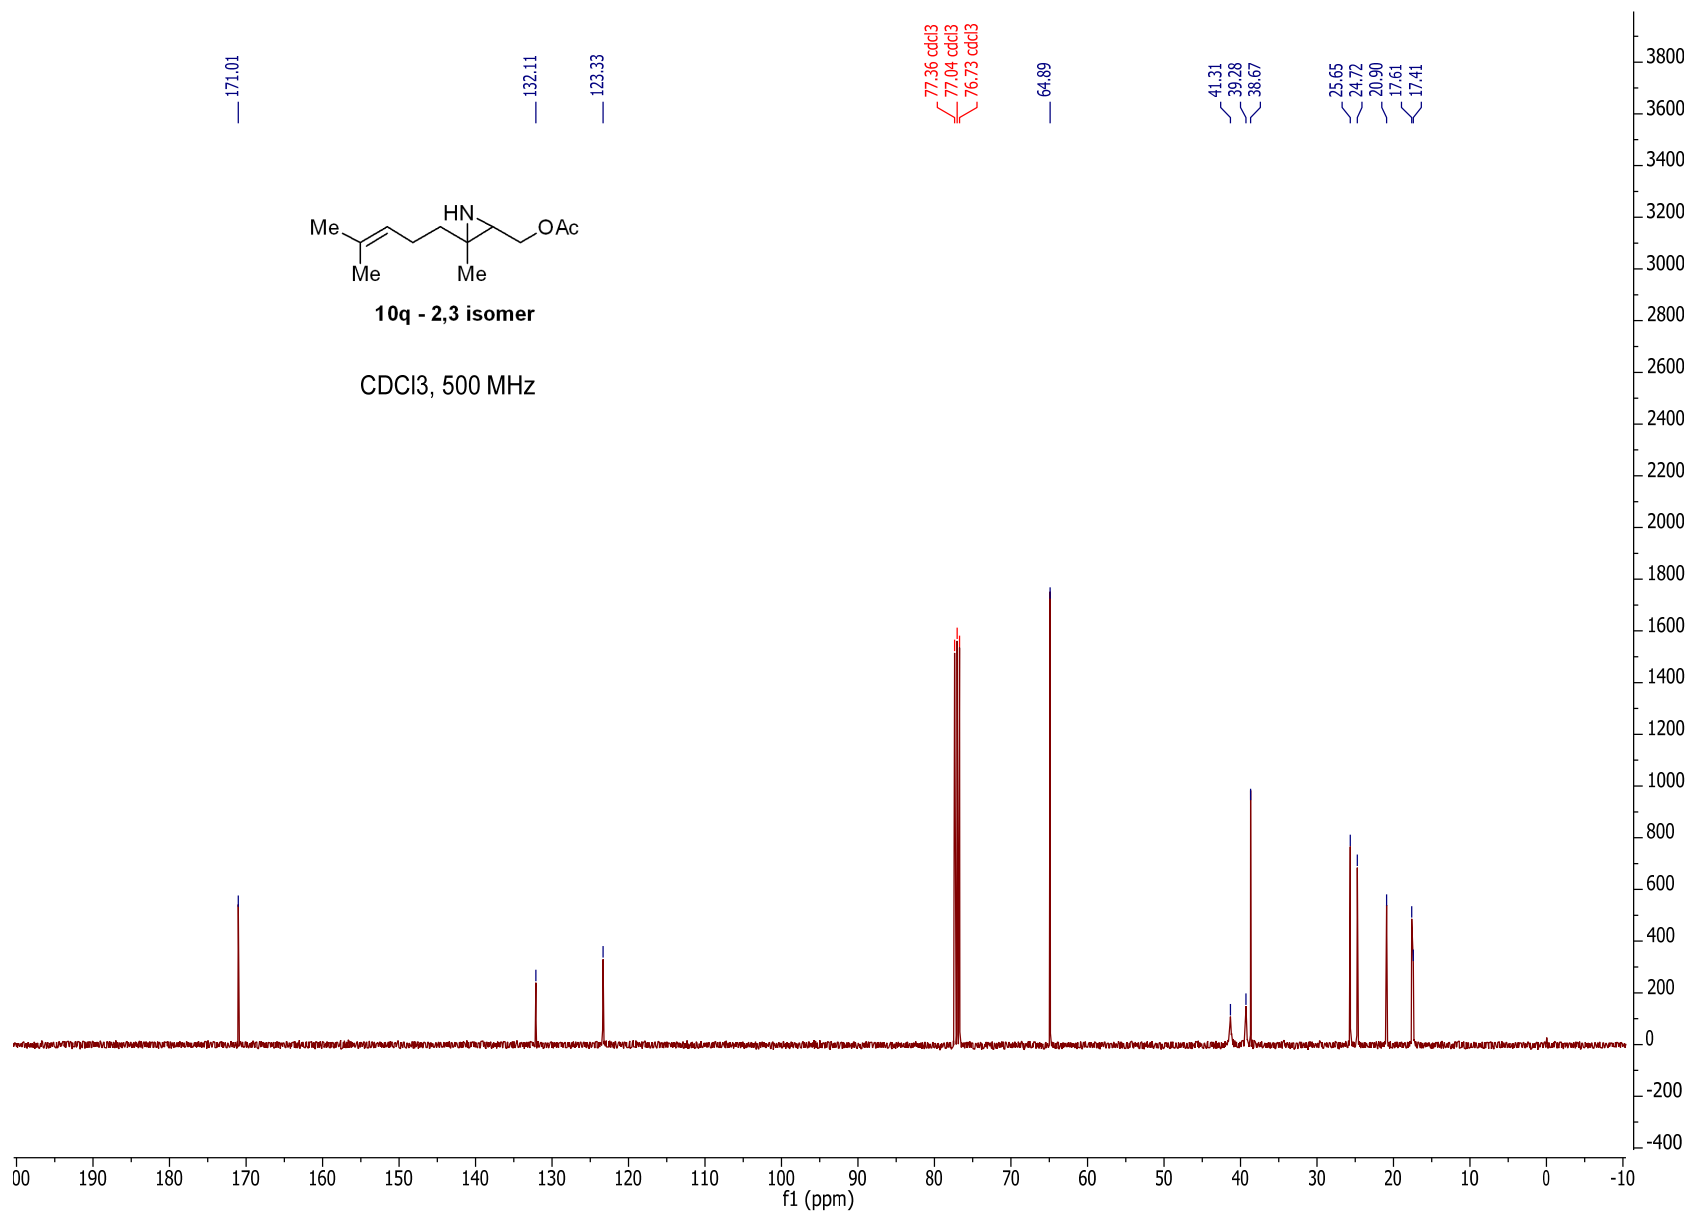

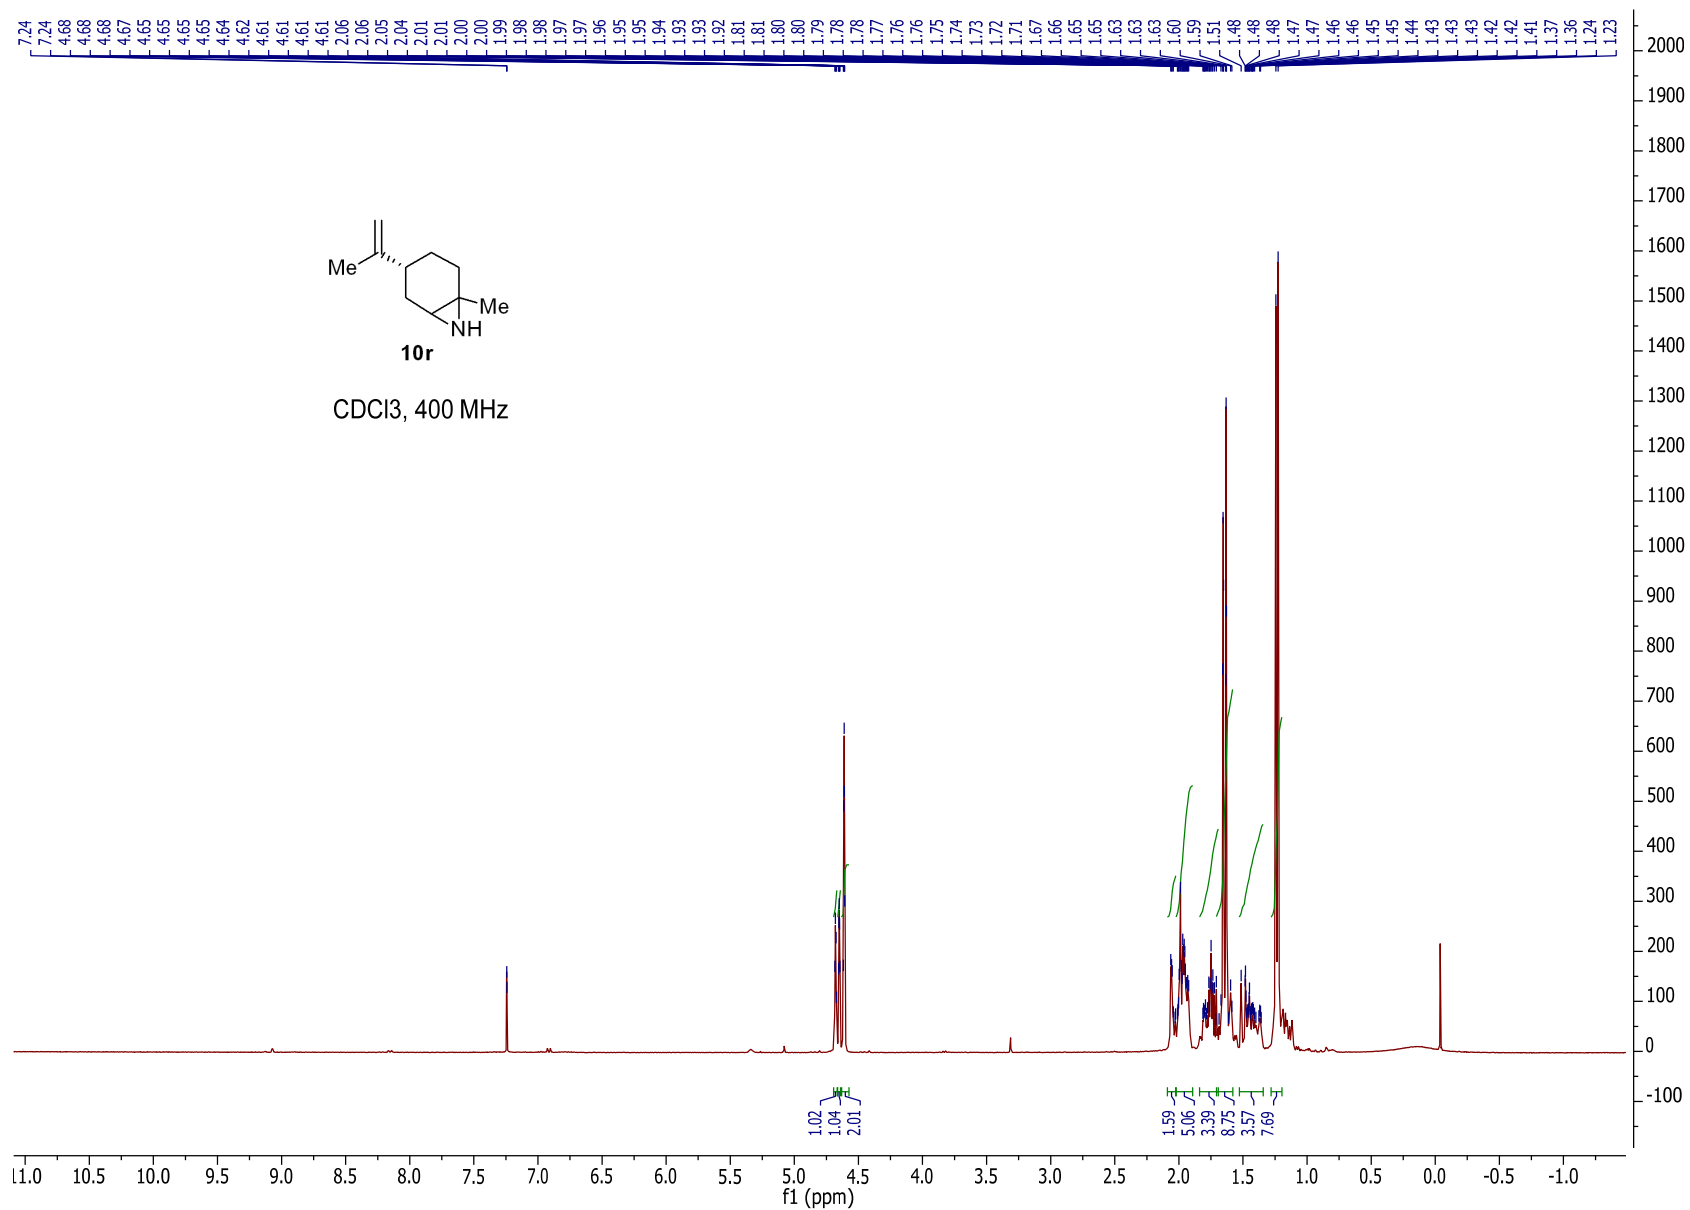

SI-158

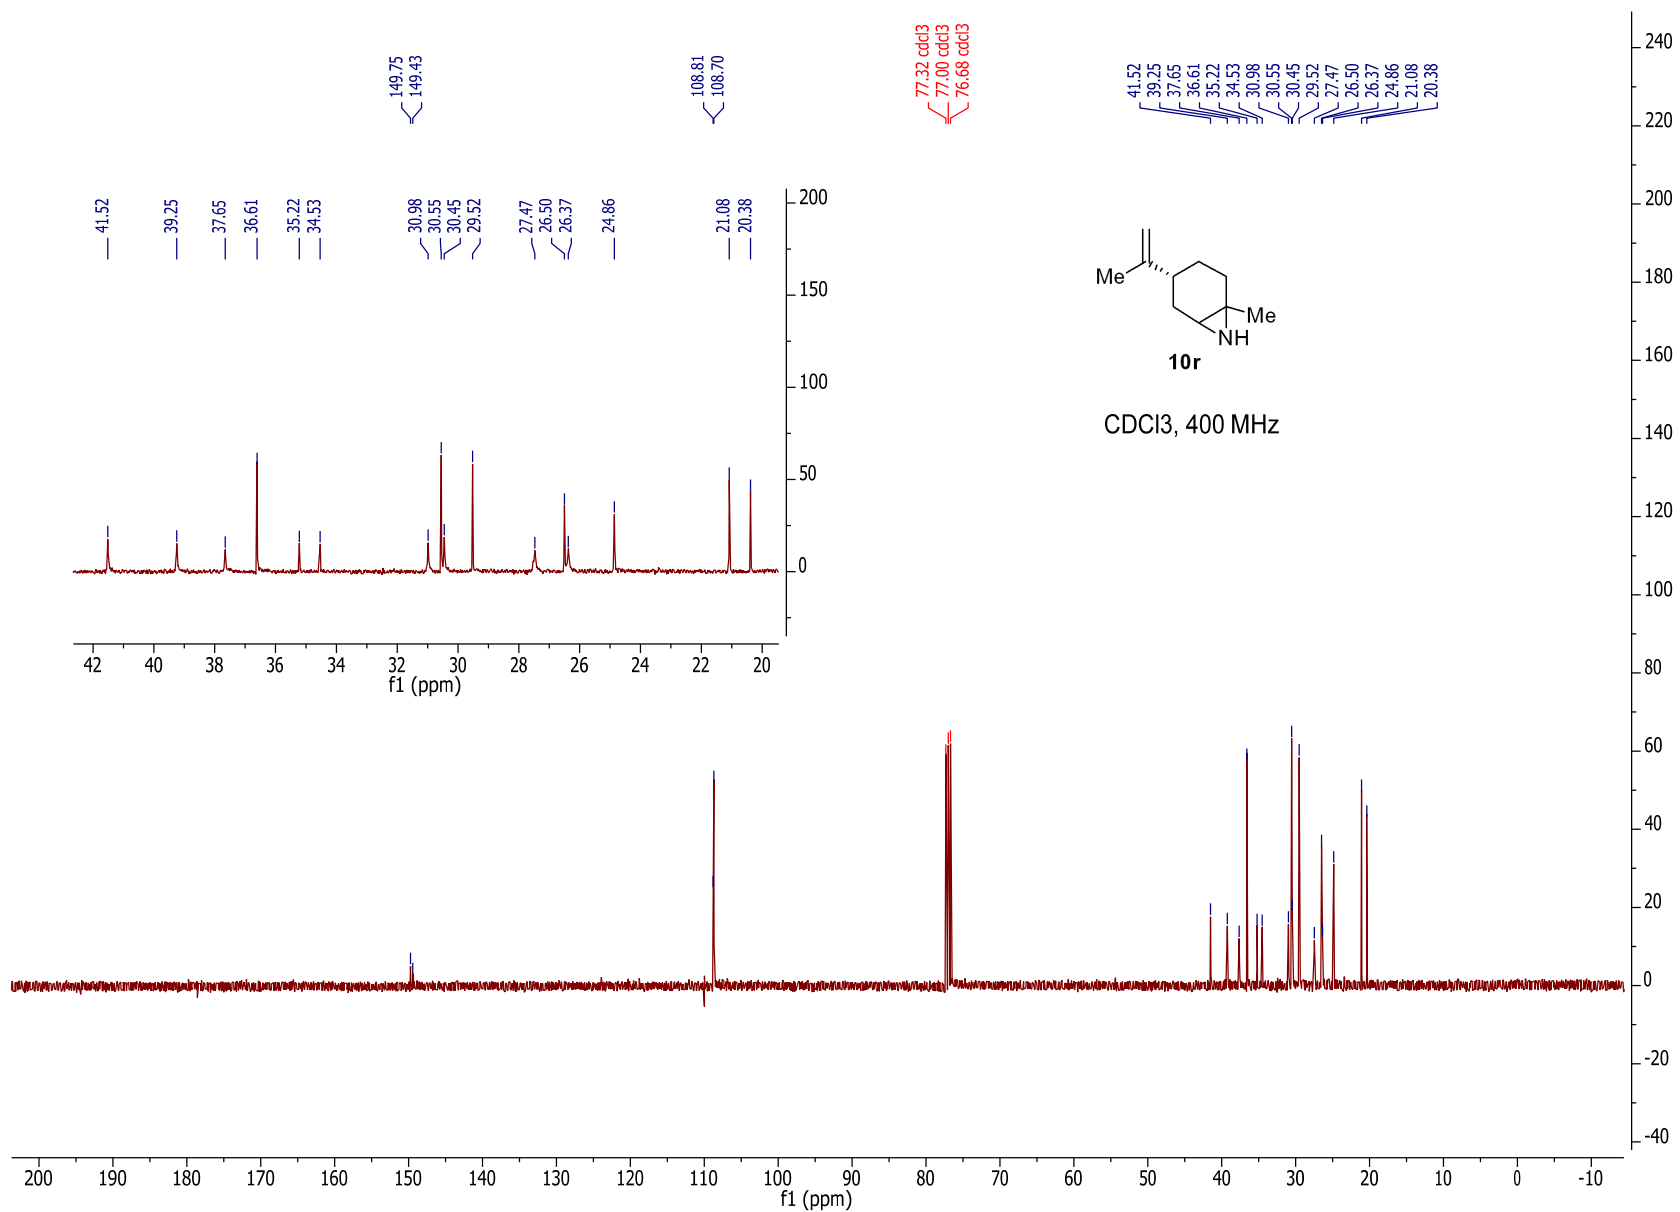

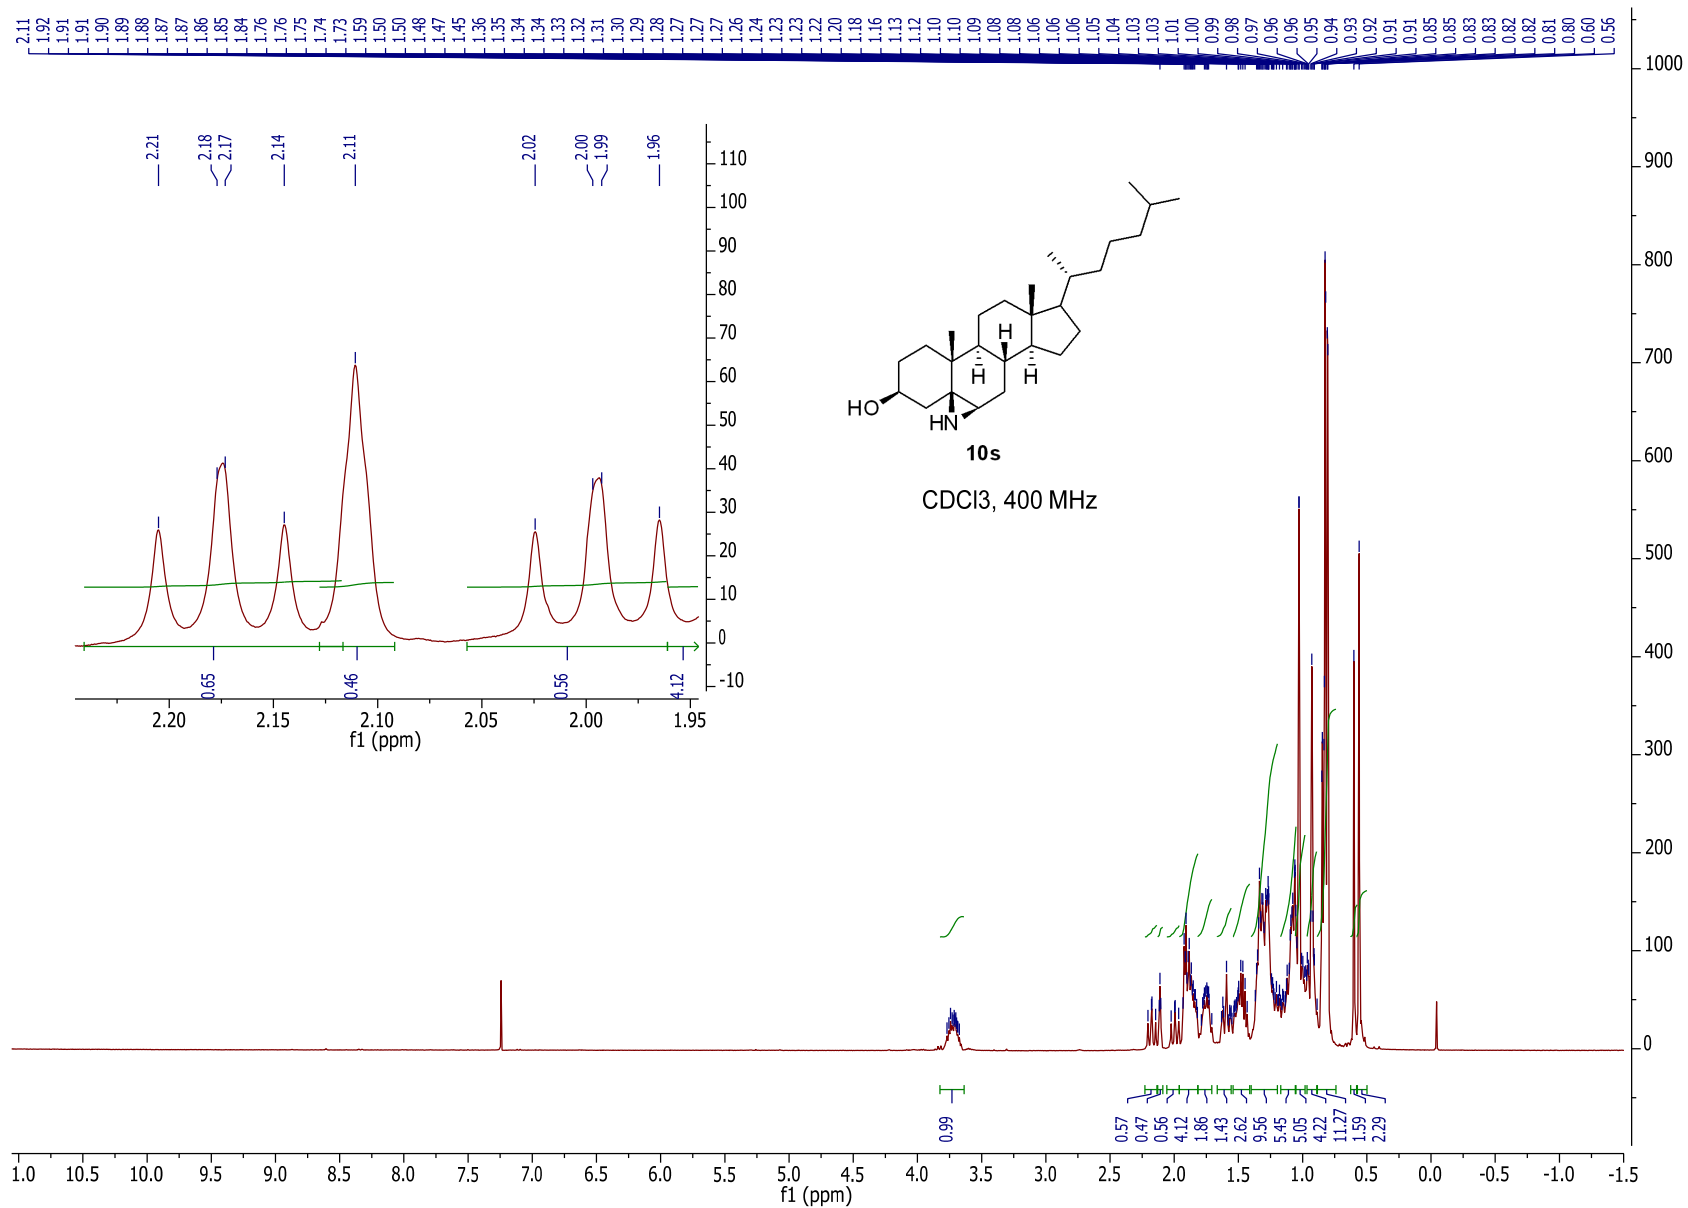

SI-160



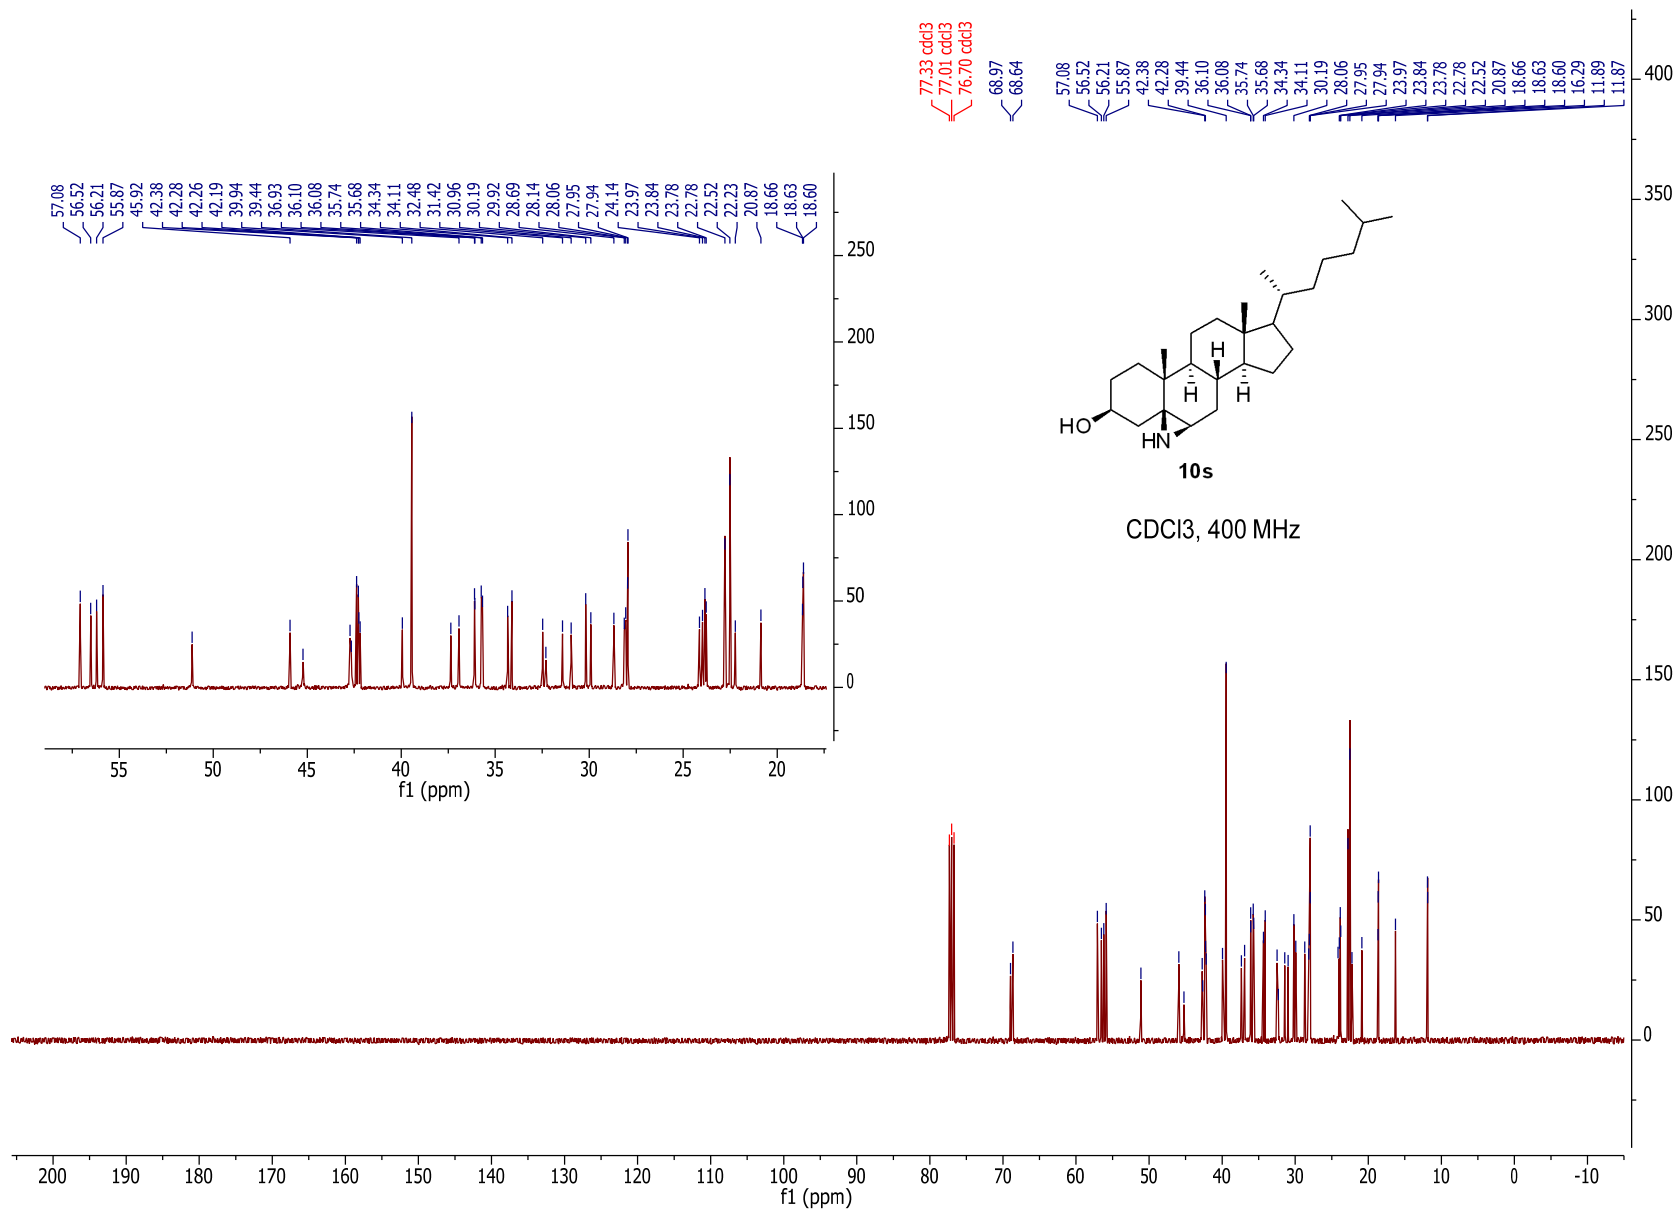

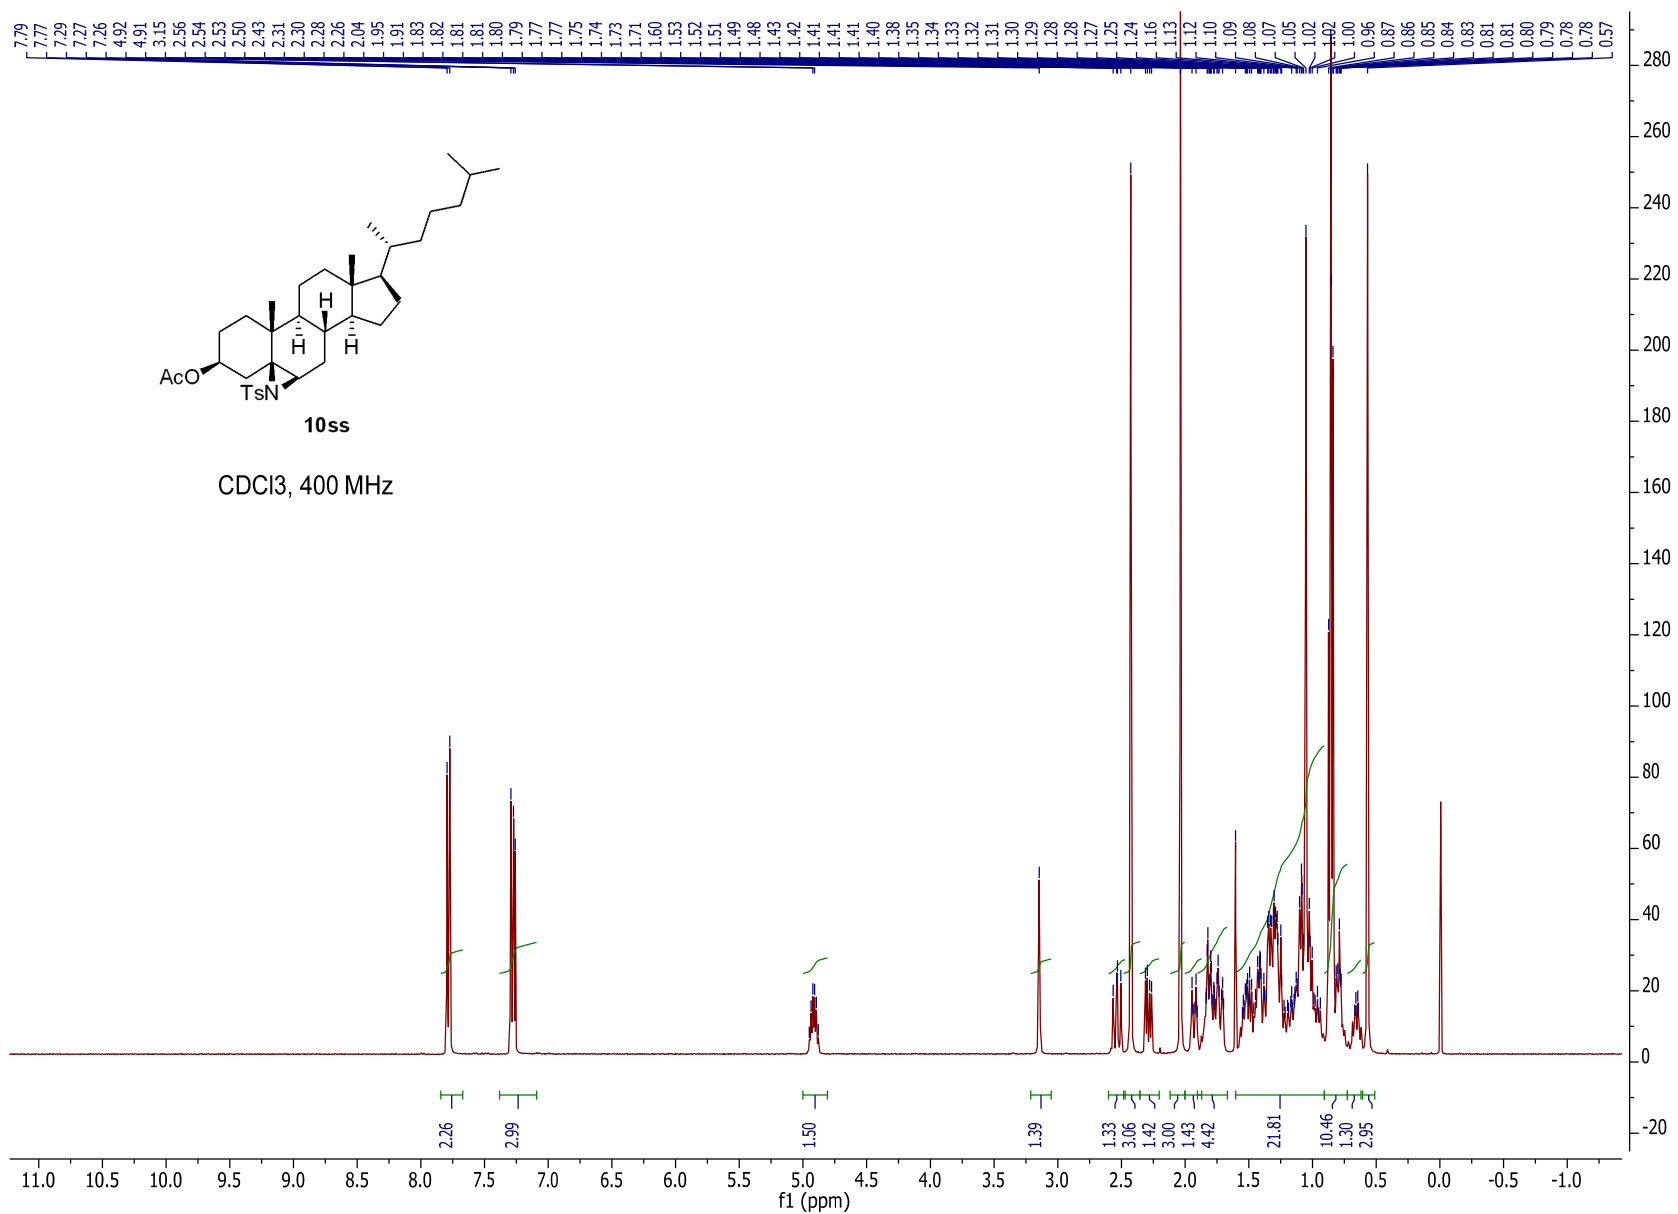

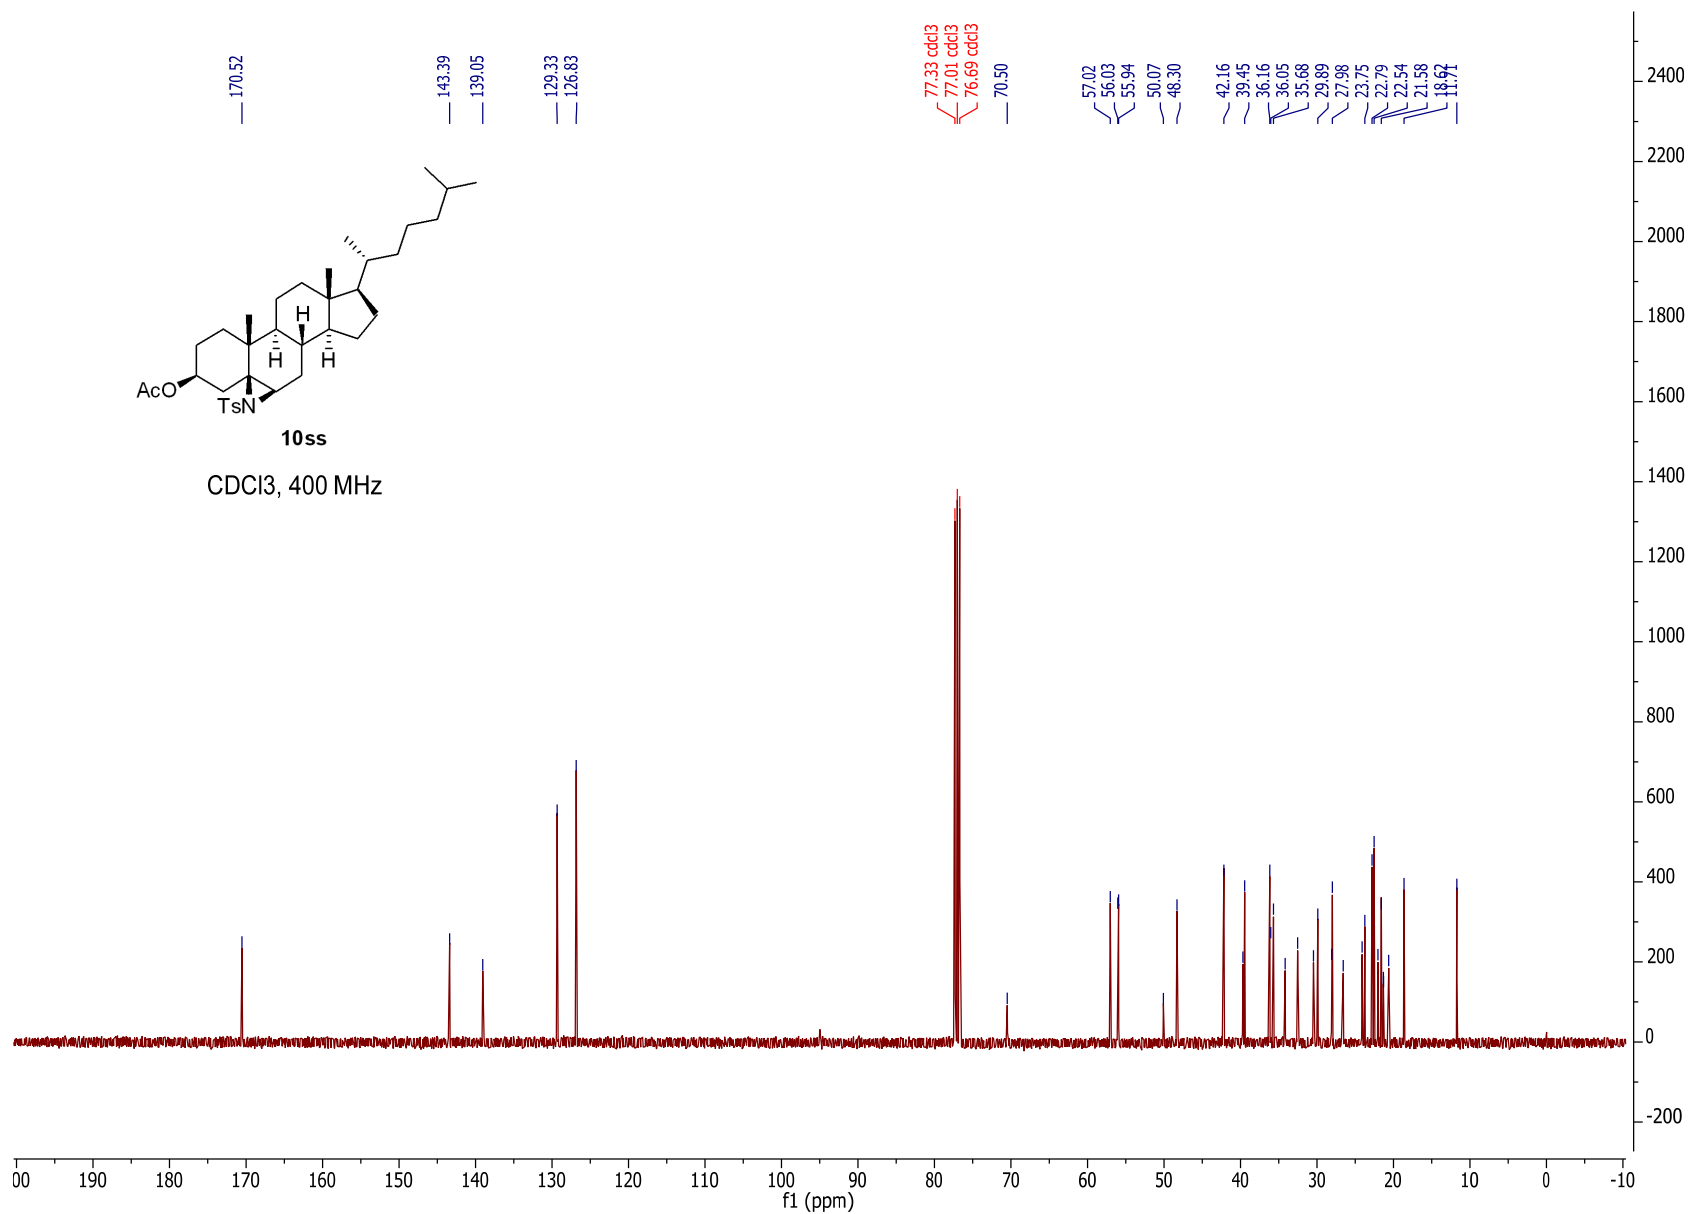

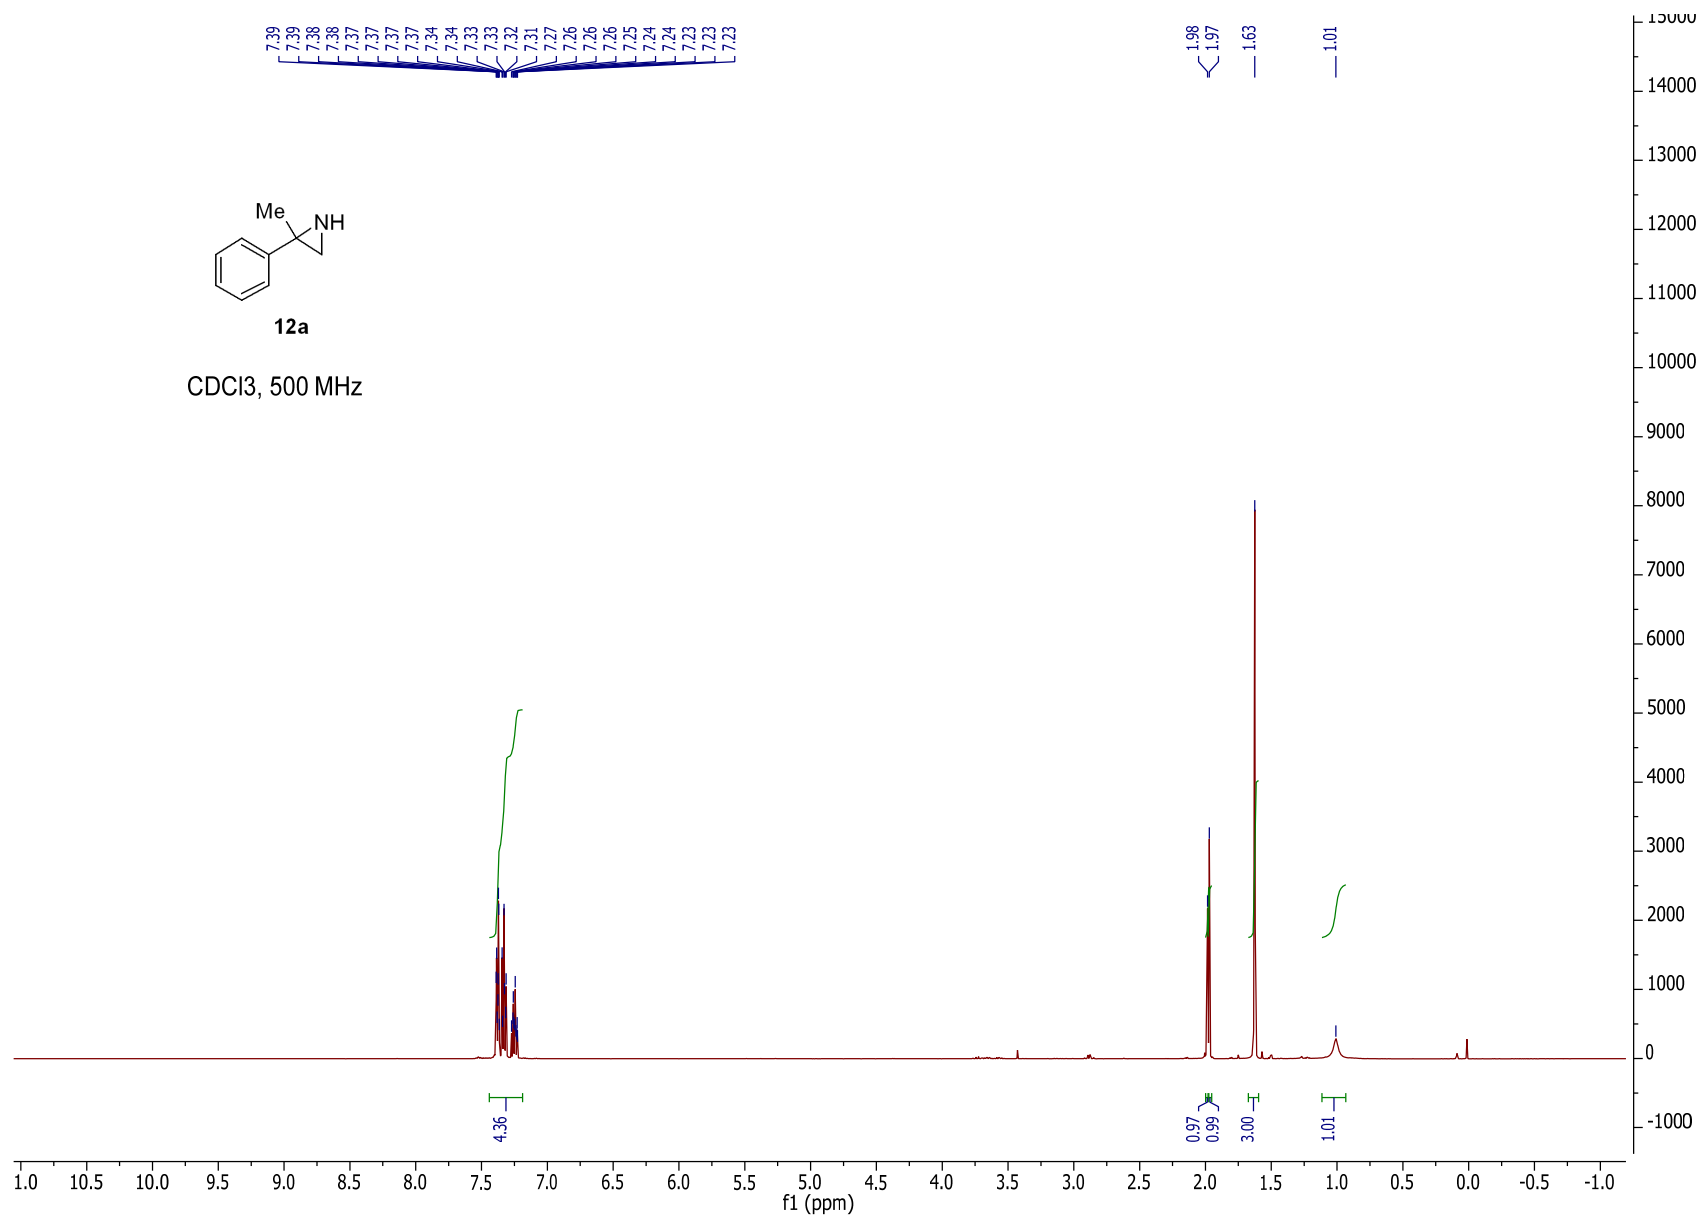

SI-164

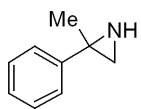

12a

CDCl<sub>3</sub>, 500 MHz

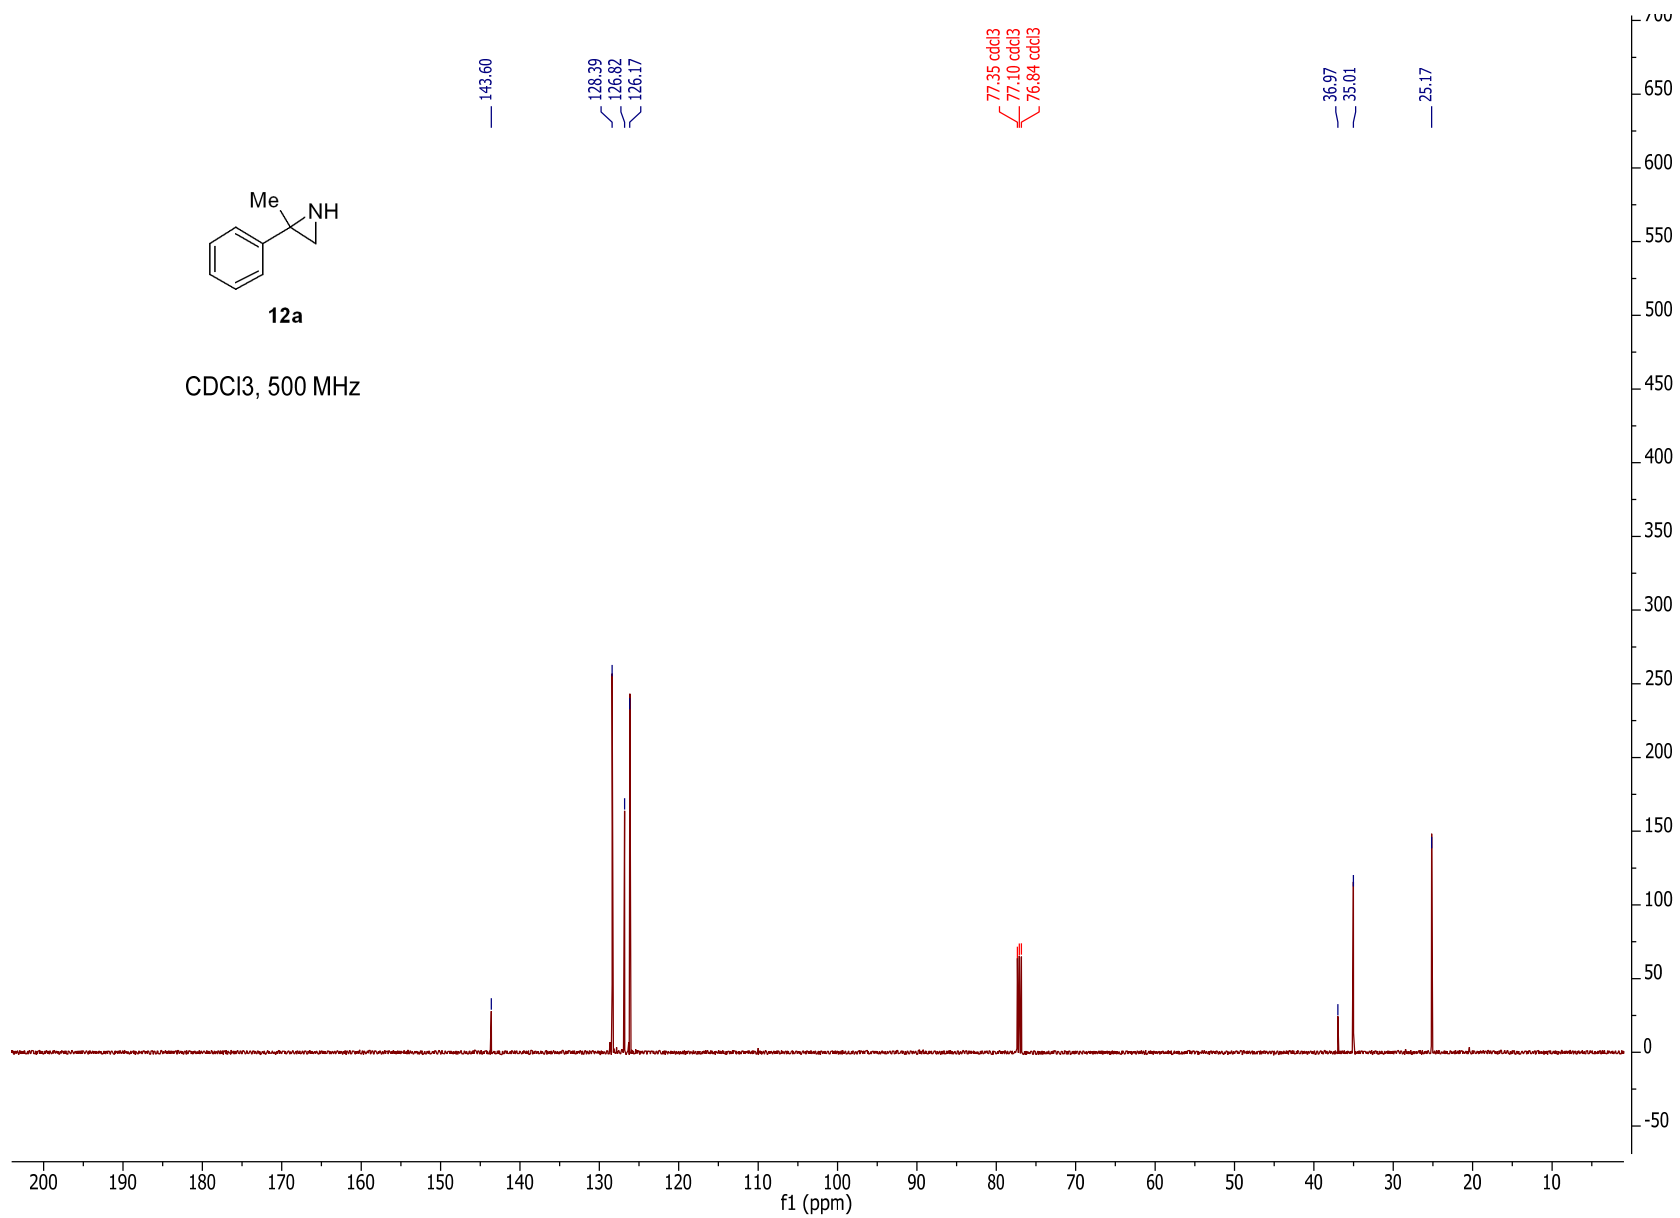

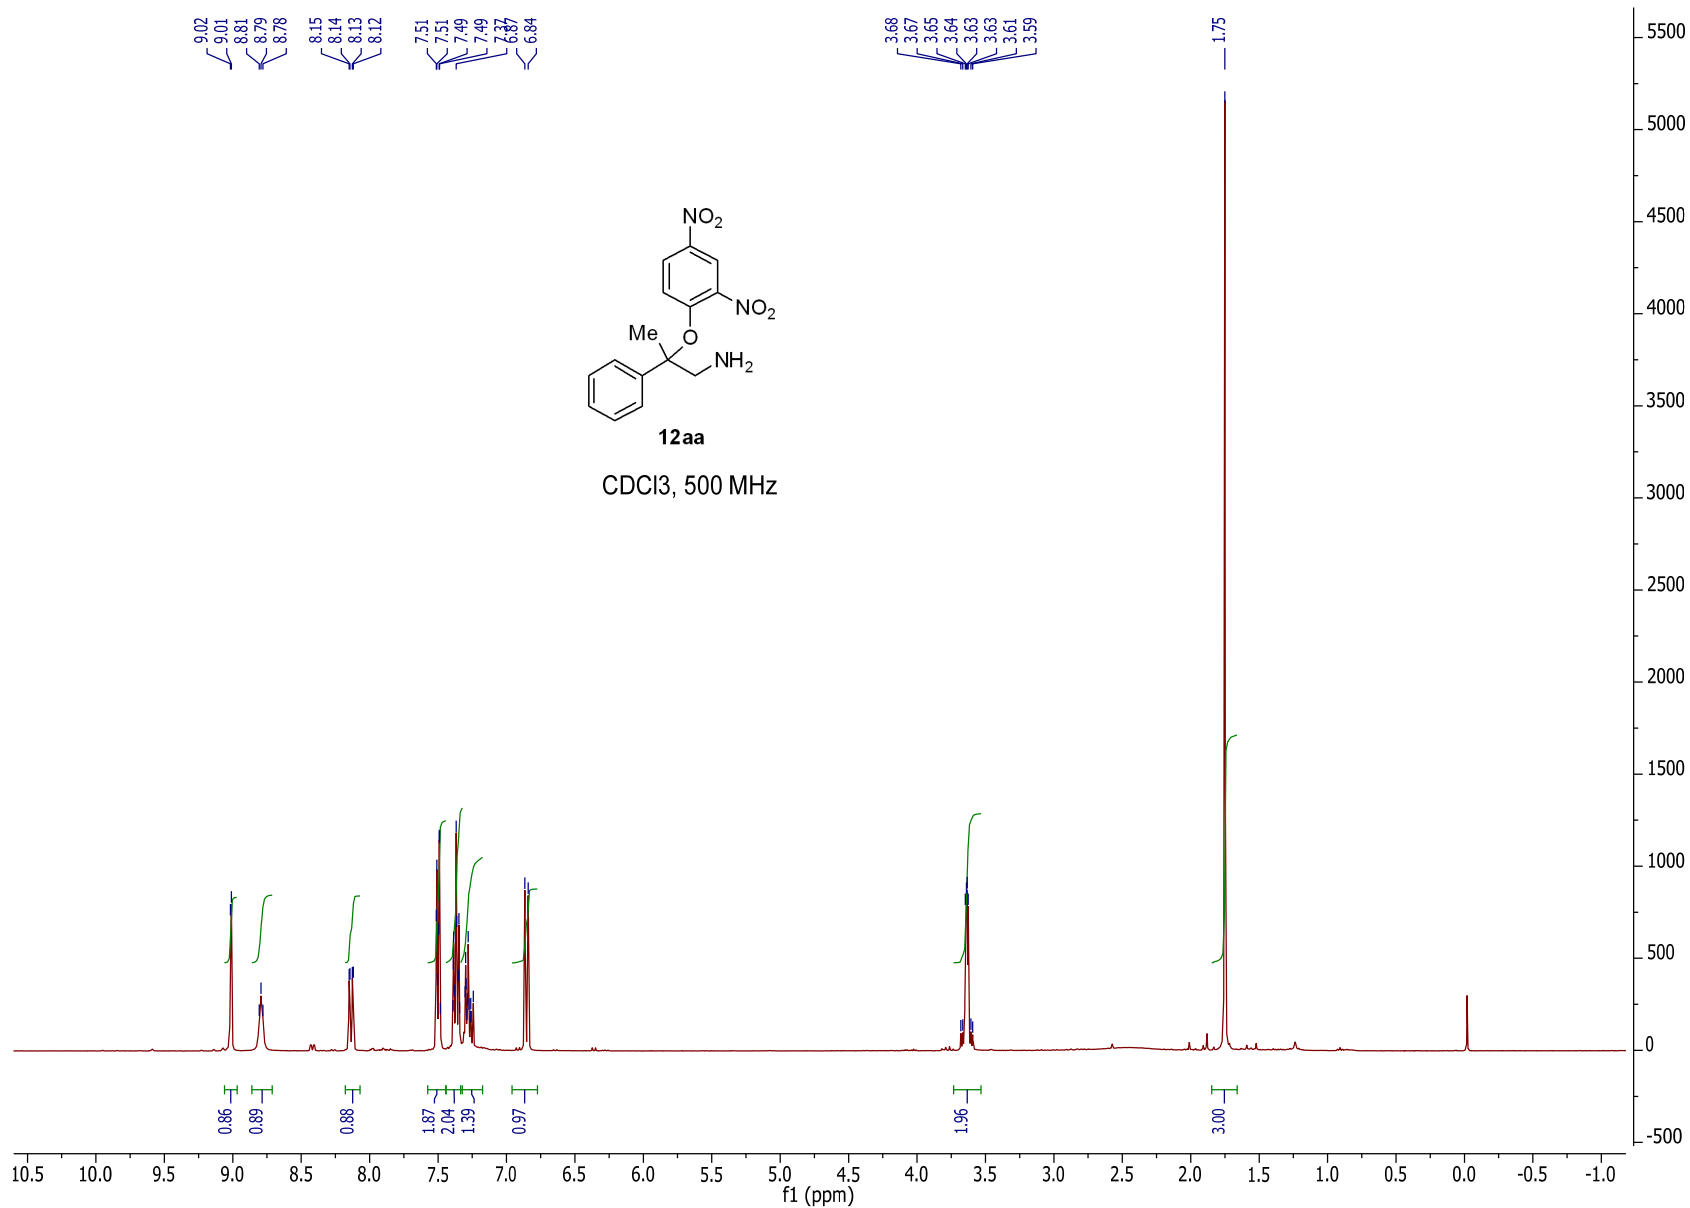

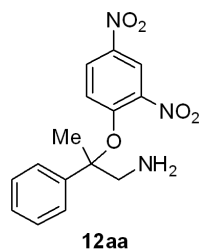

CDCl<sub>3</sub>, 500 MHz

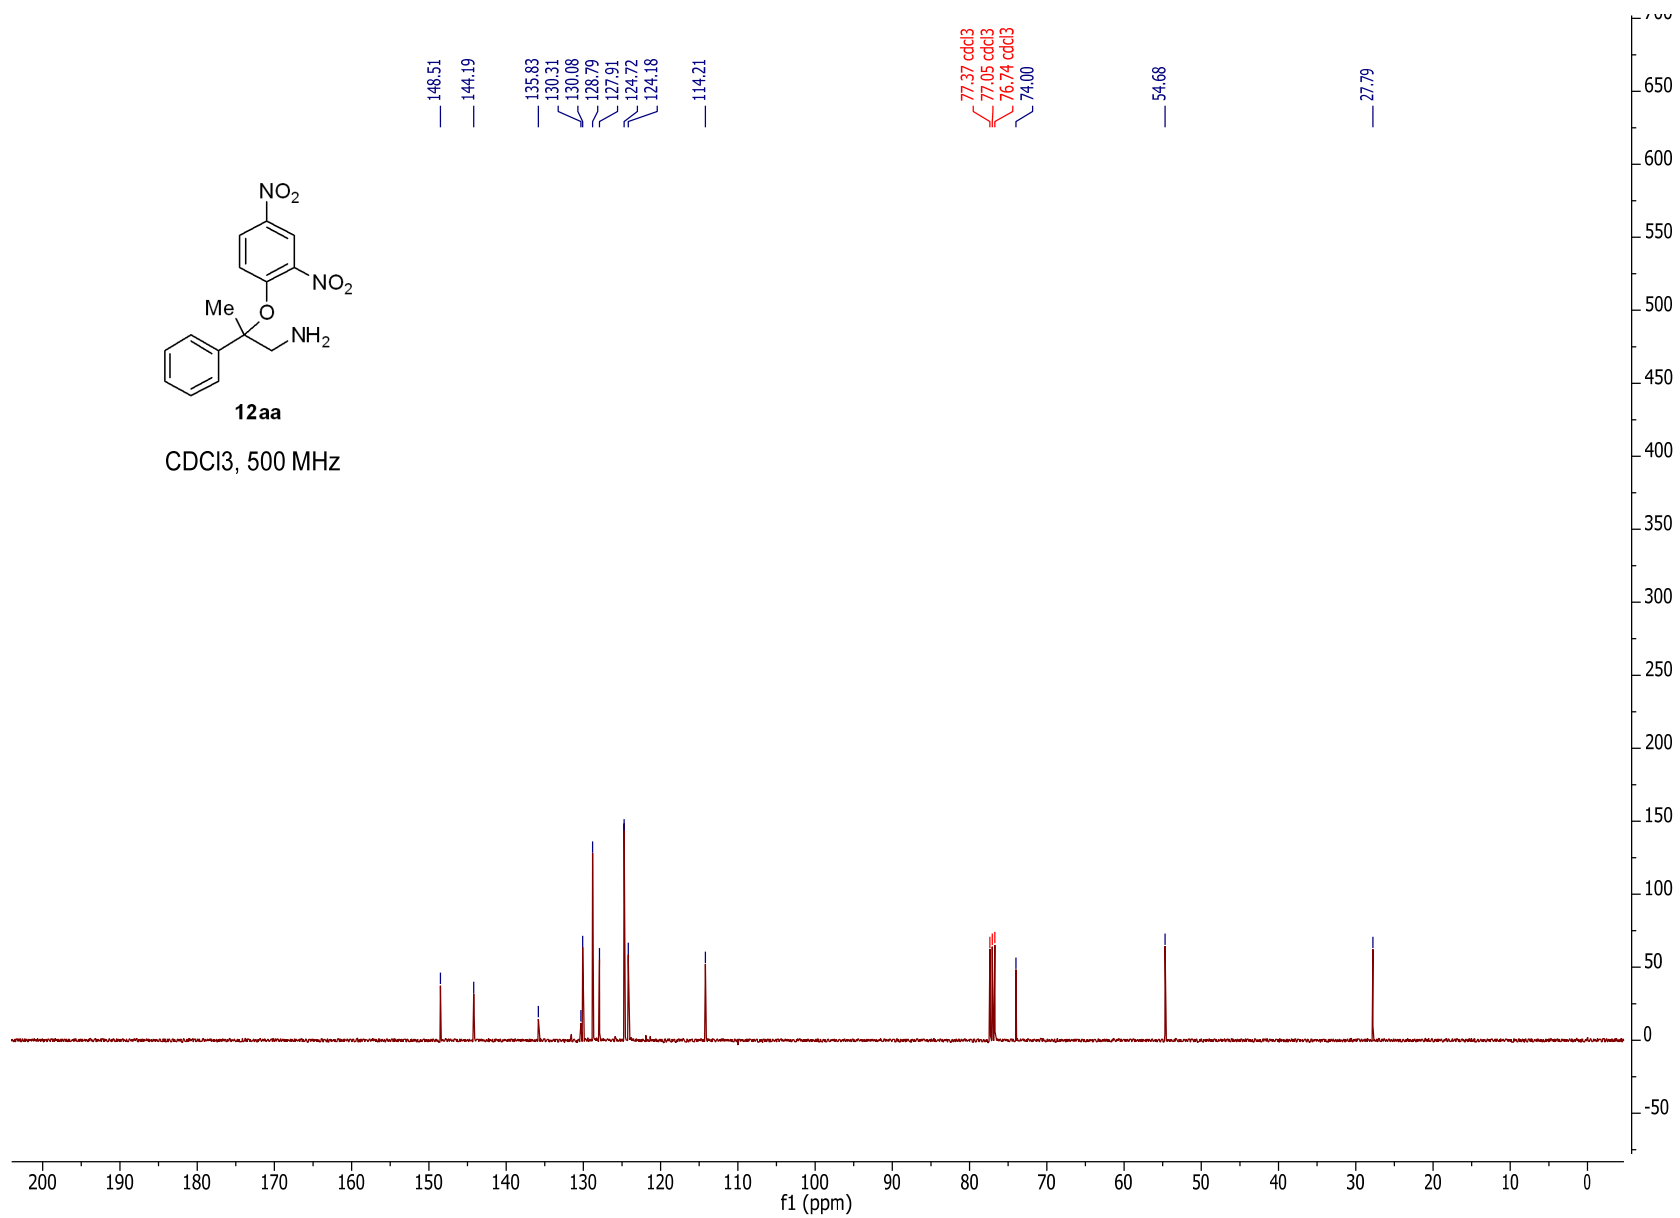

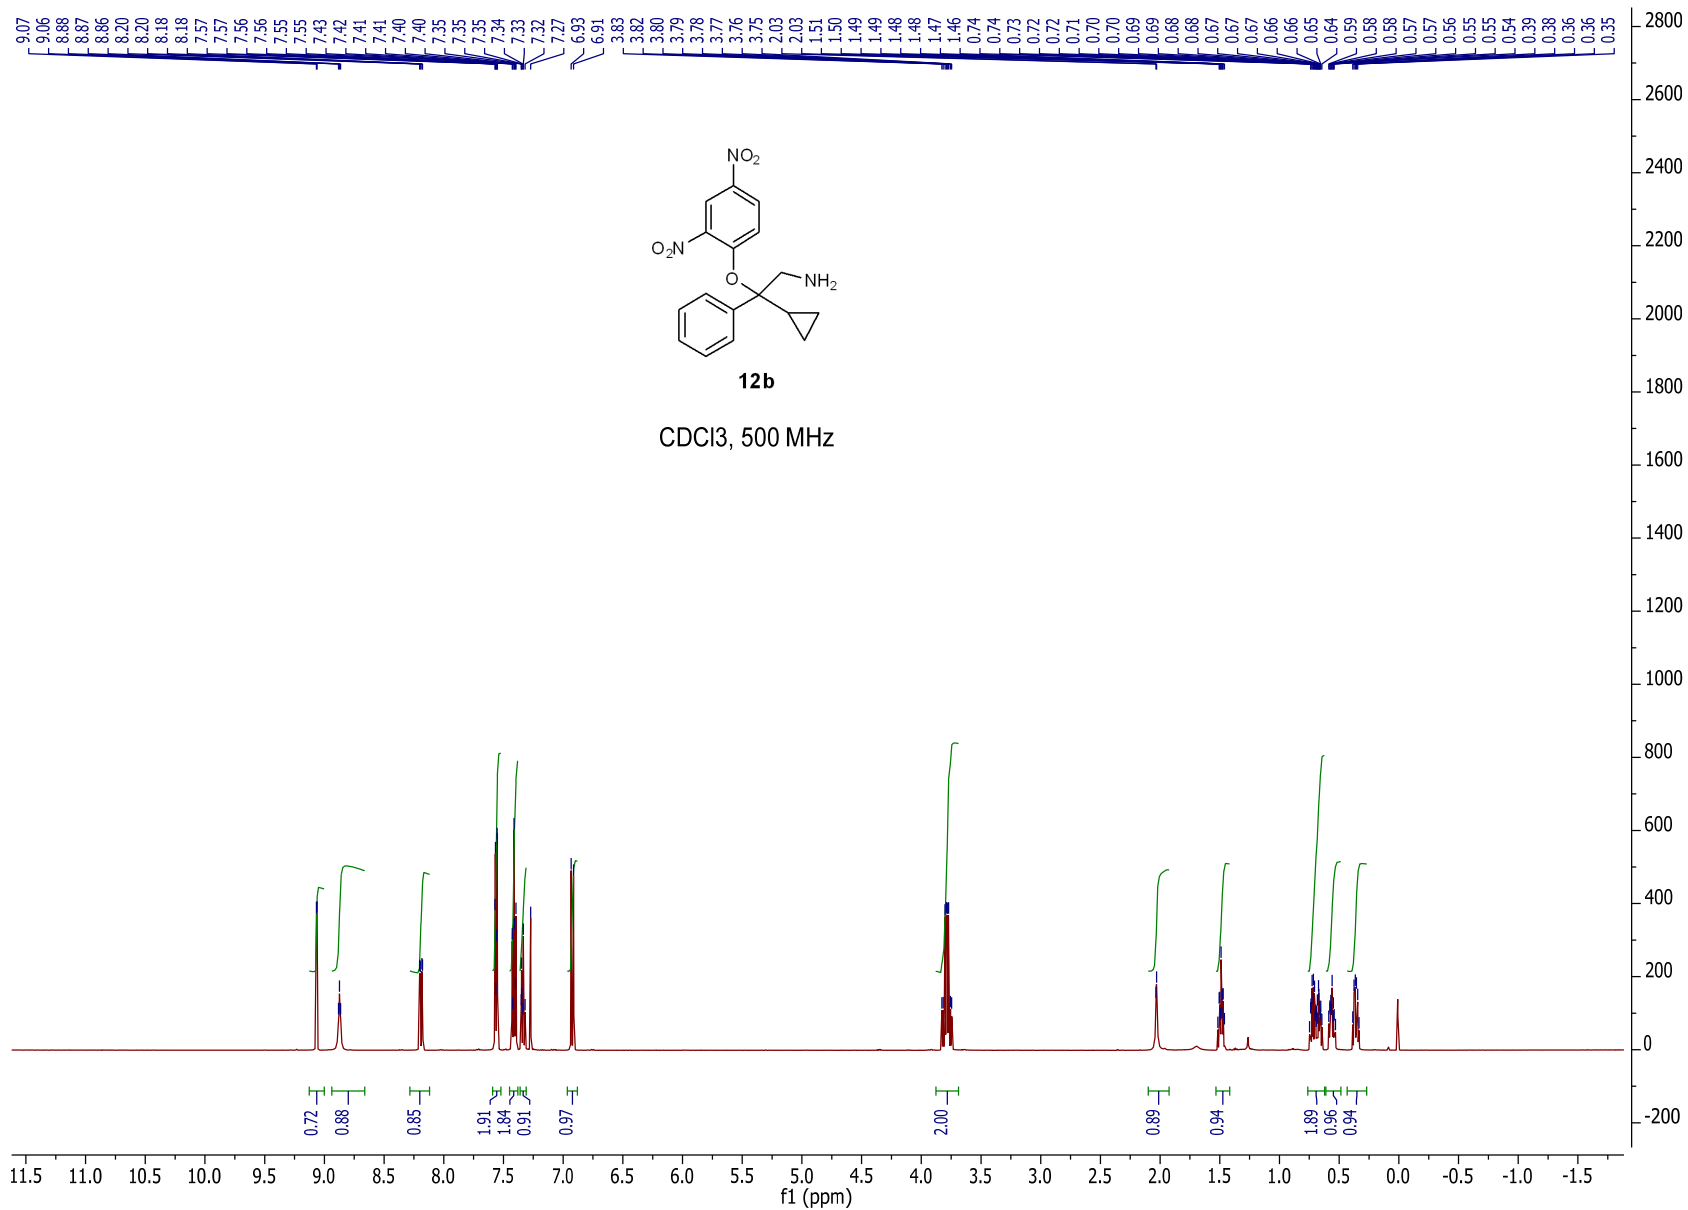



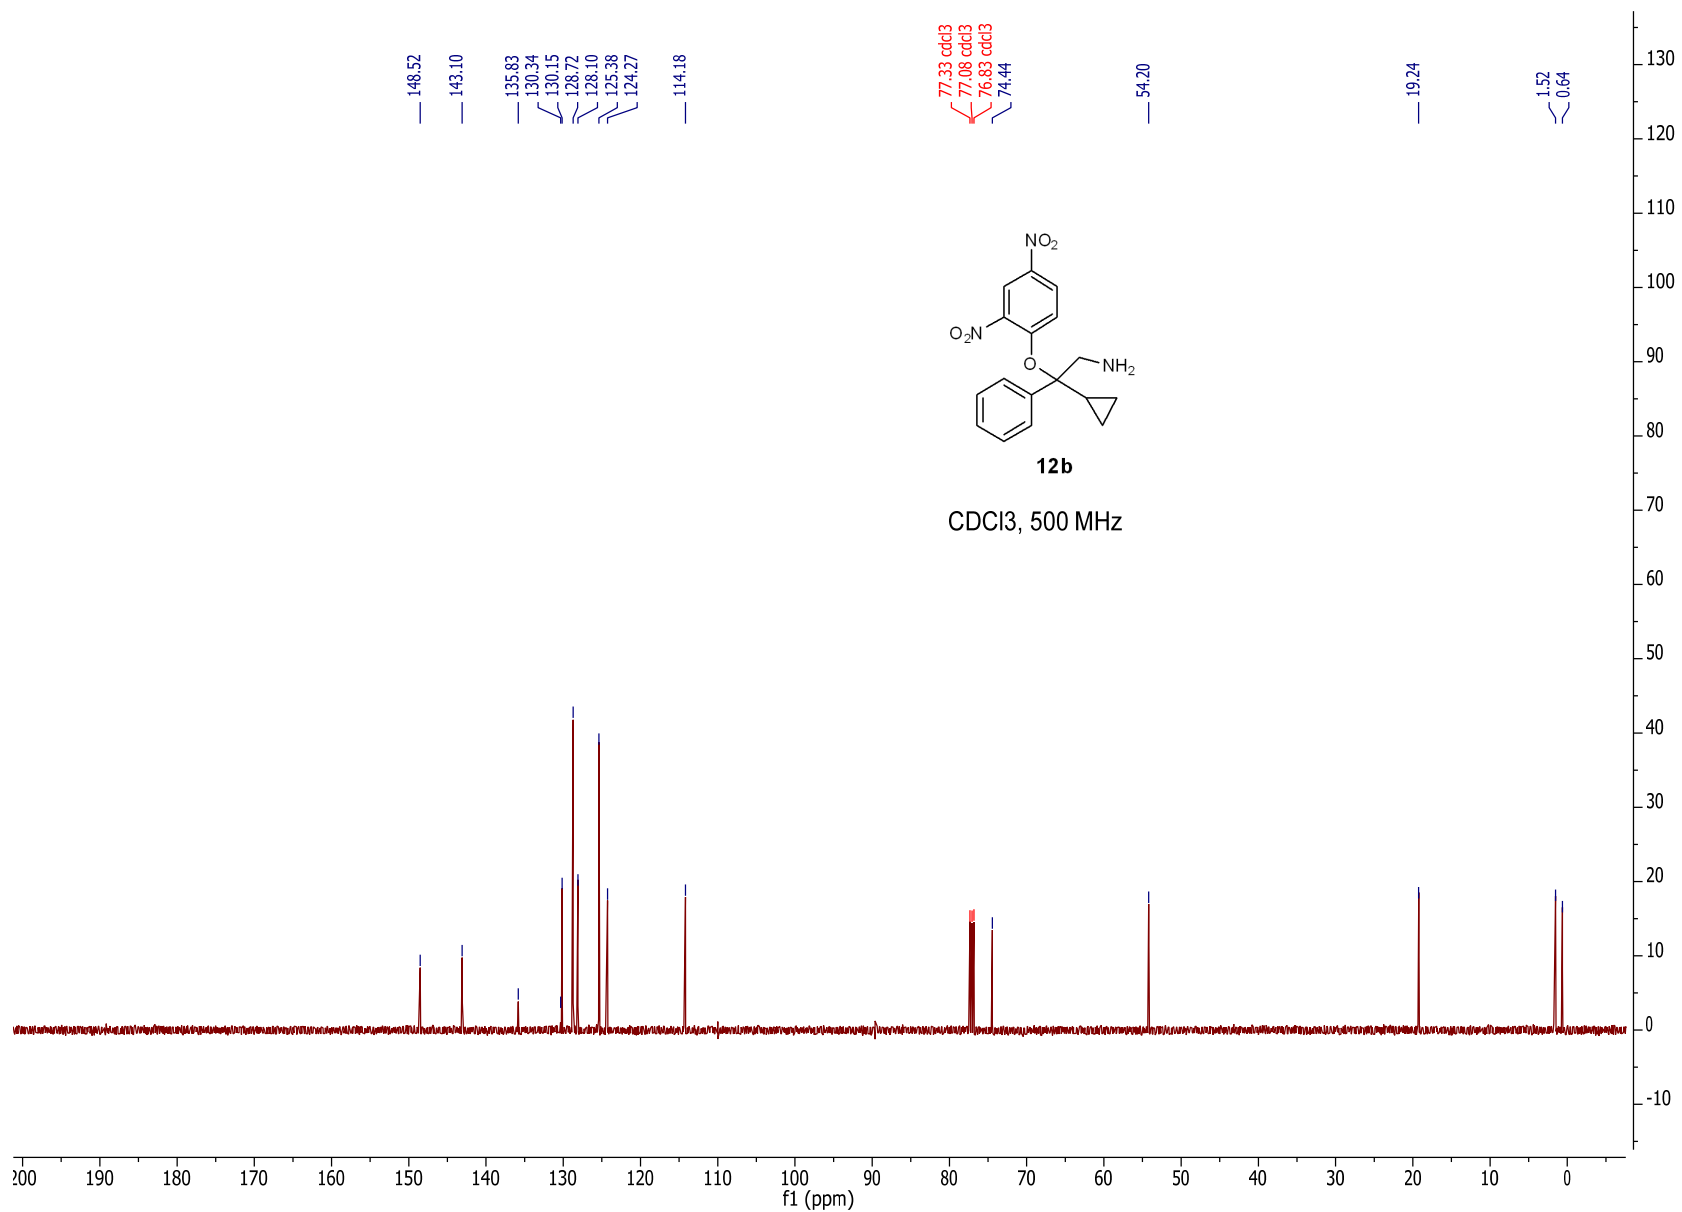

SI-169

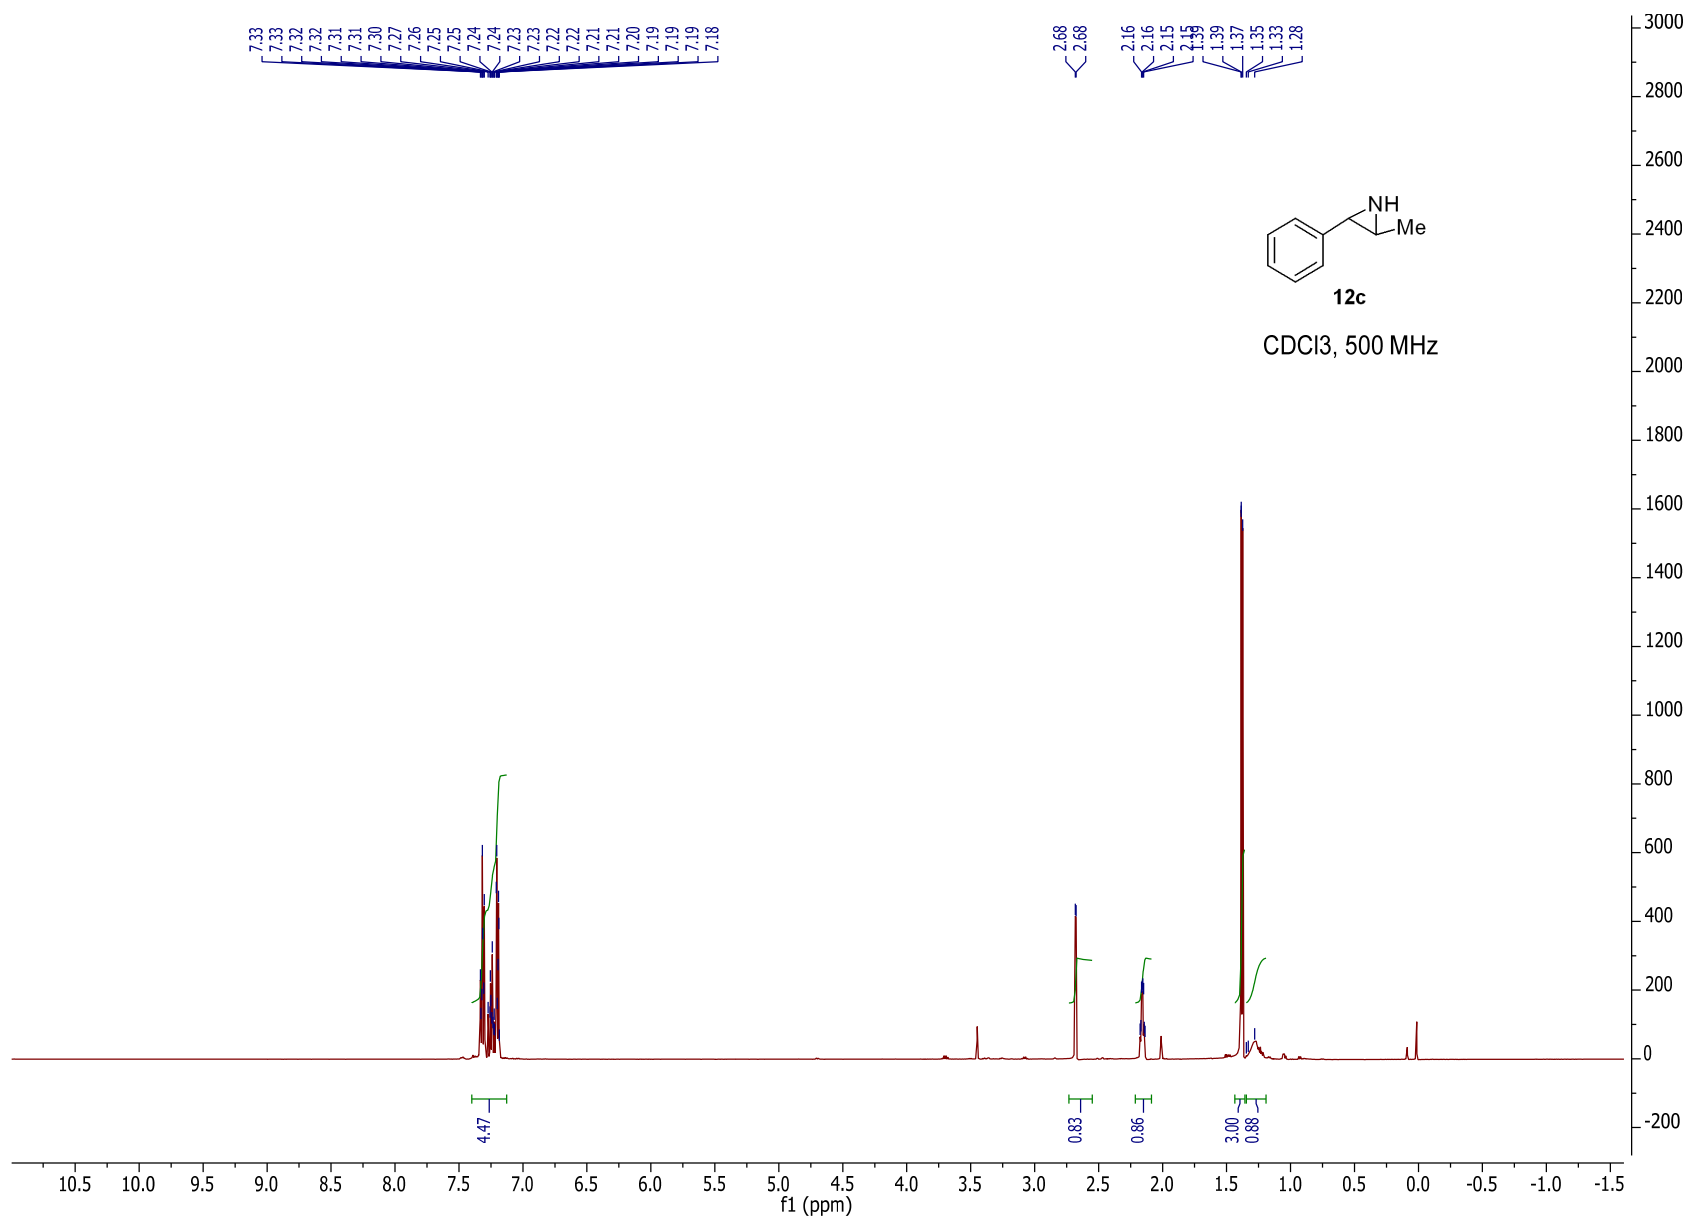

SI-170

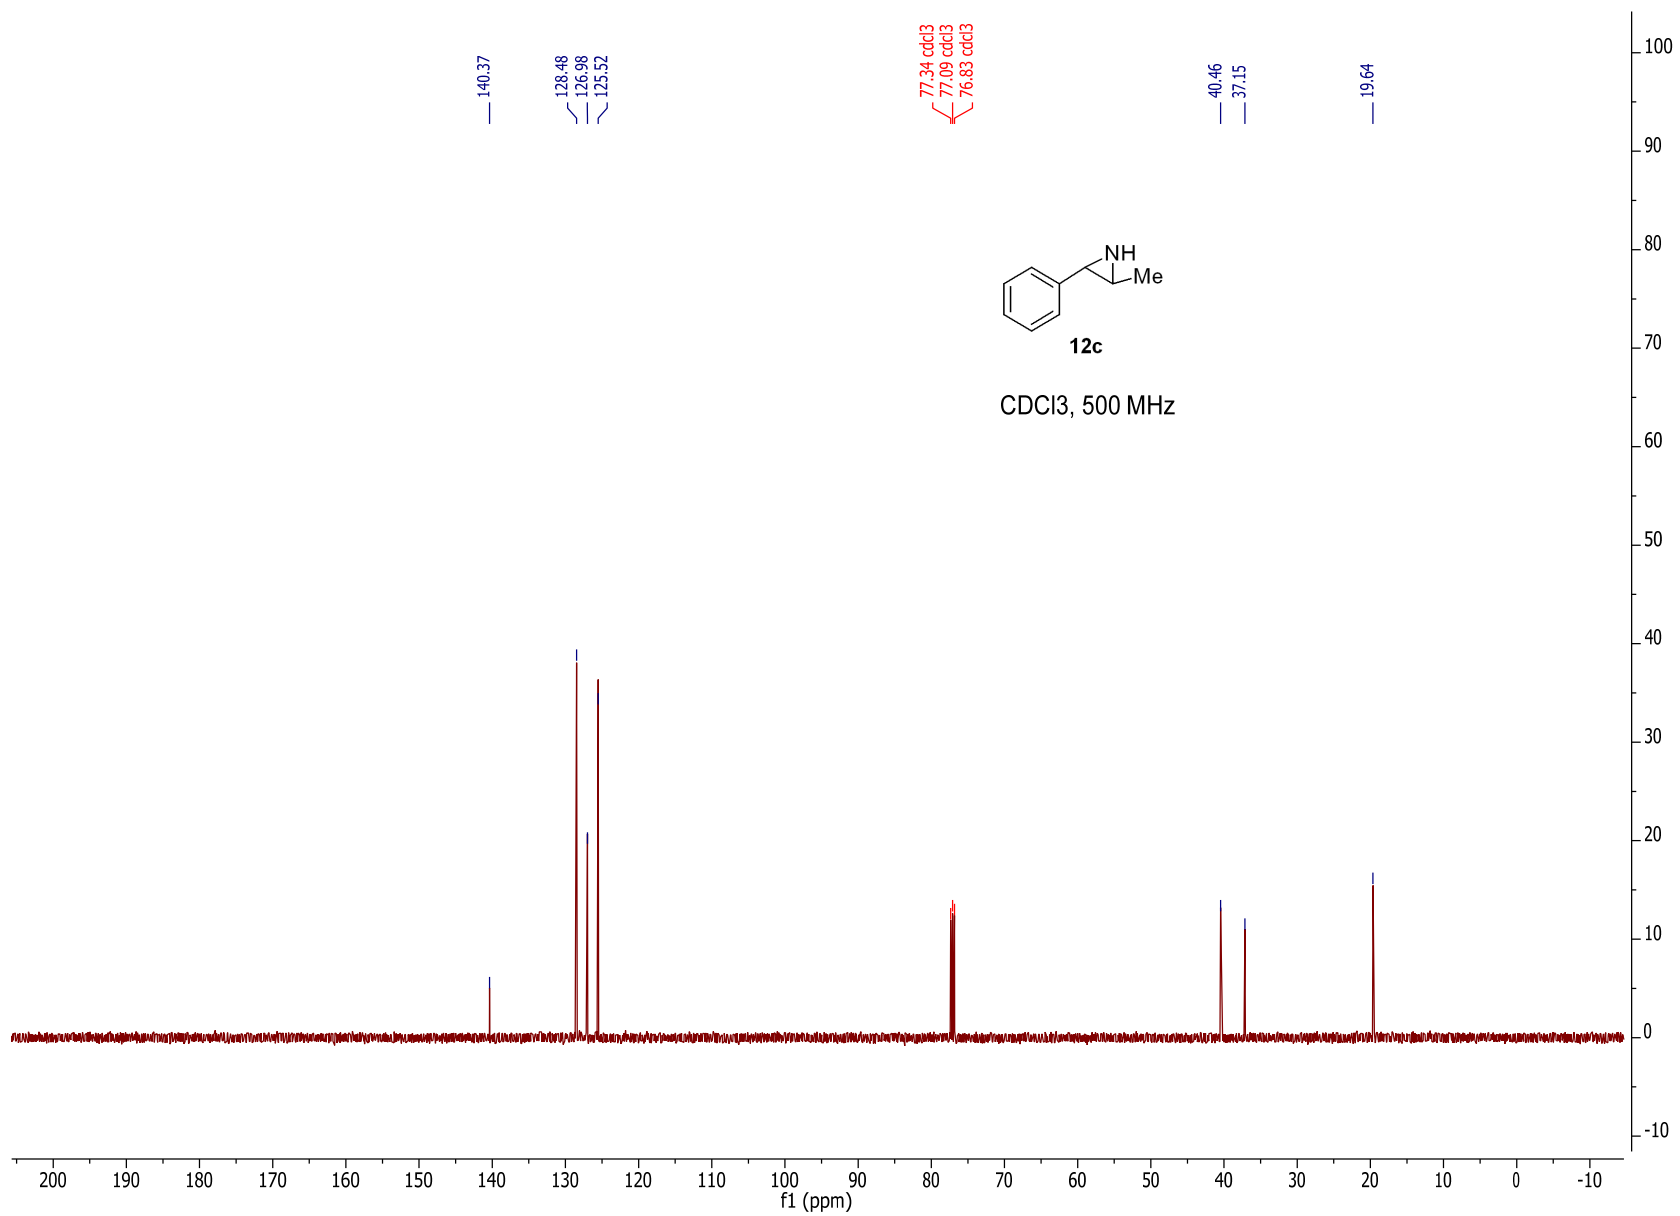

SI-171

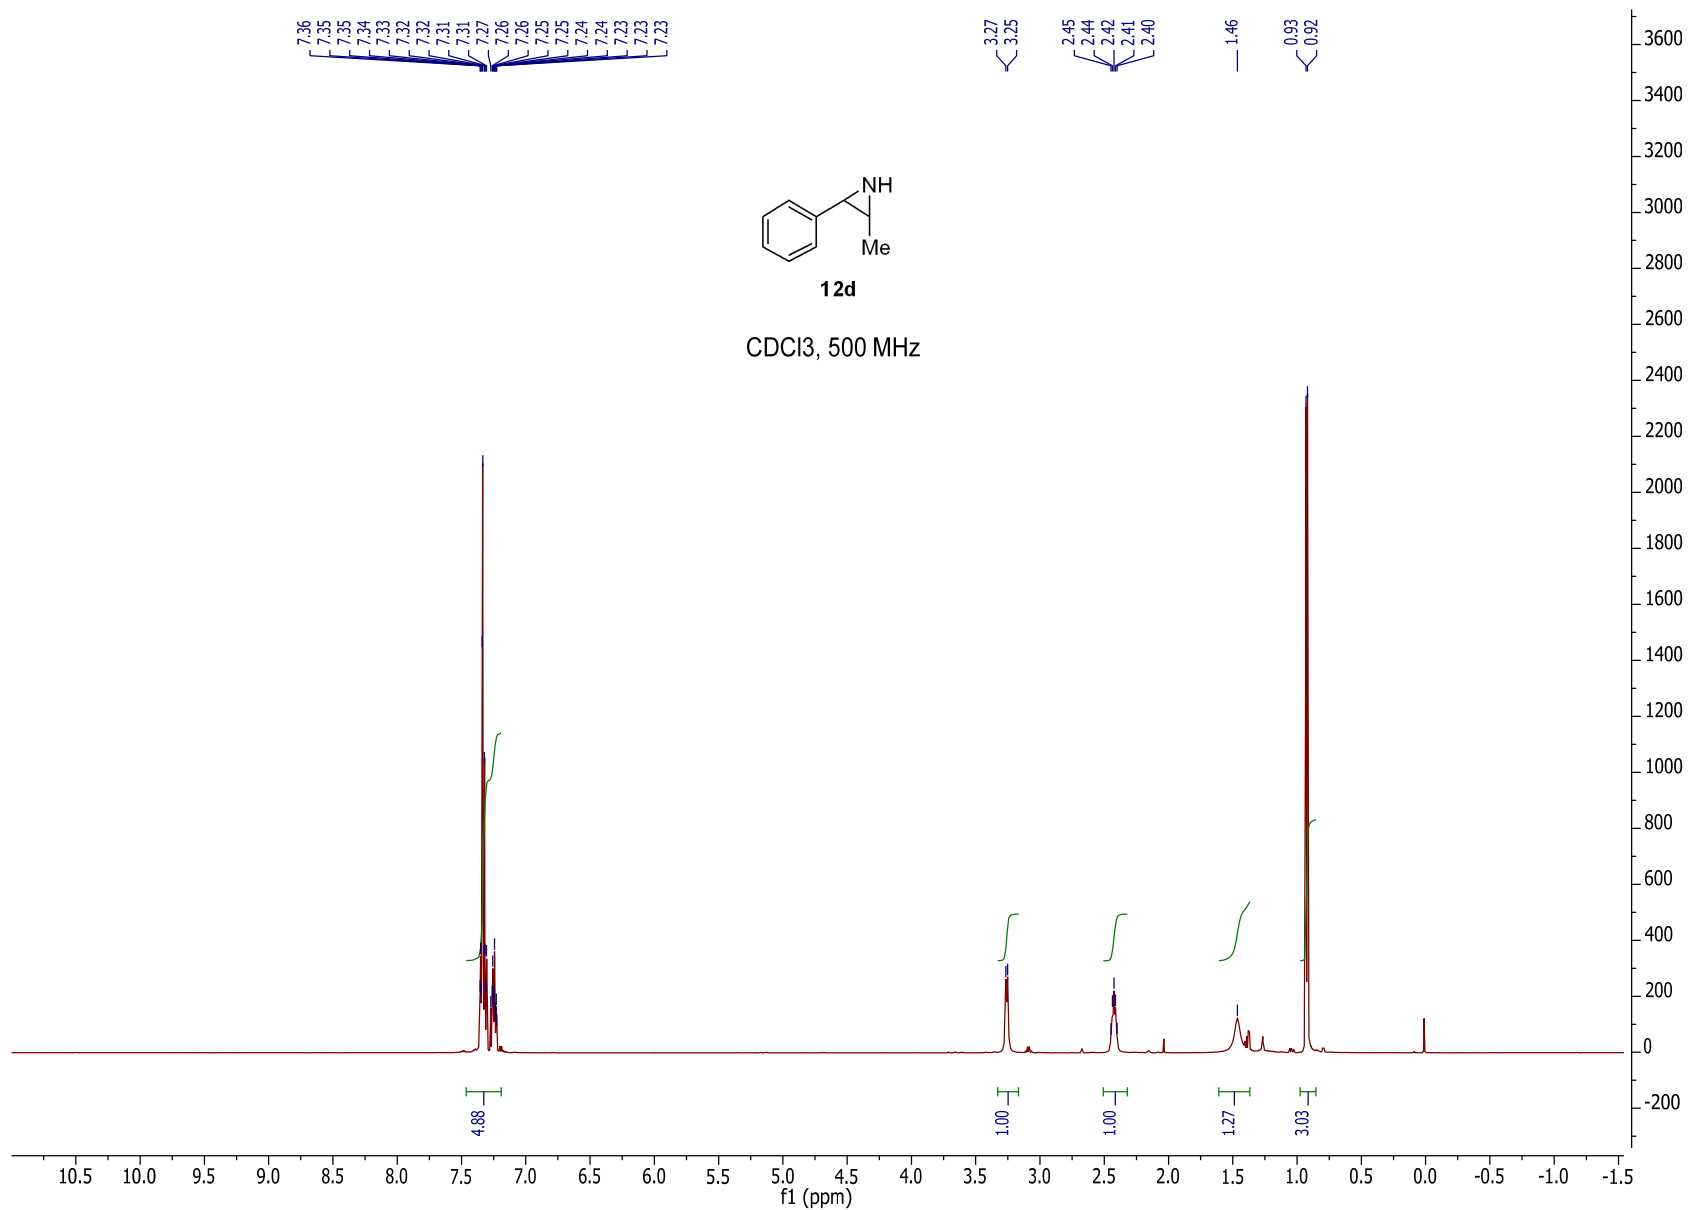

SI-172

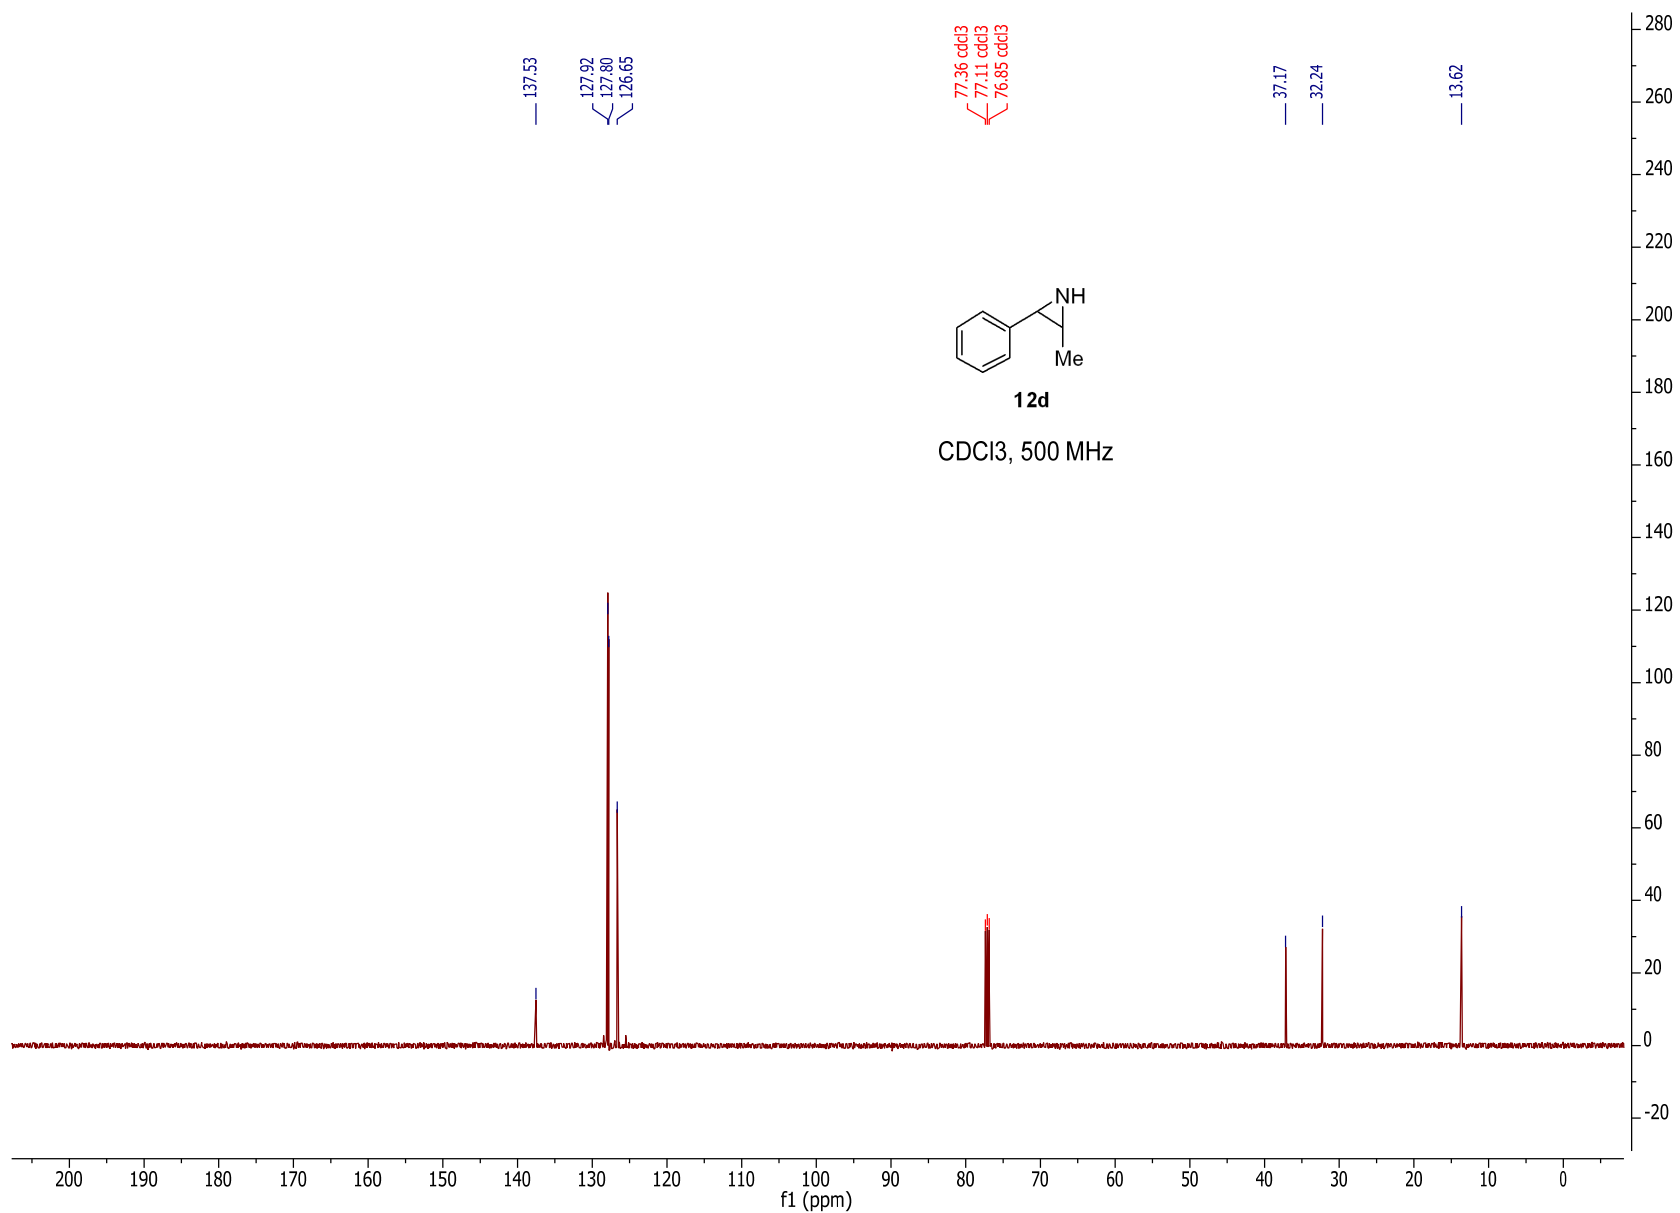

SI-173

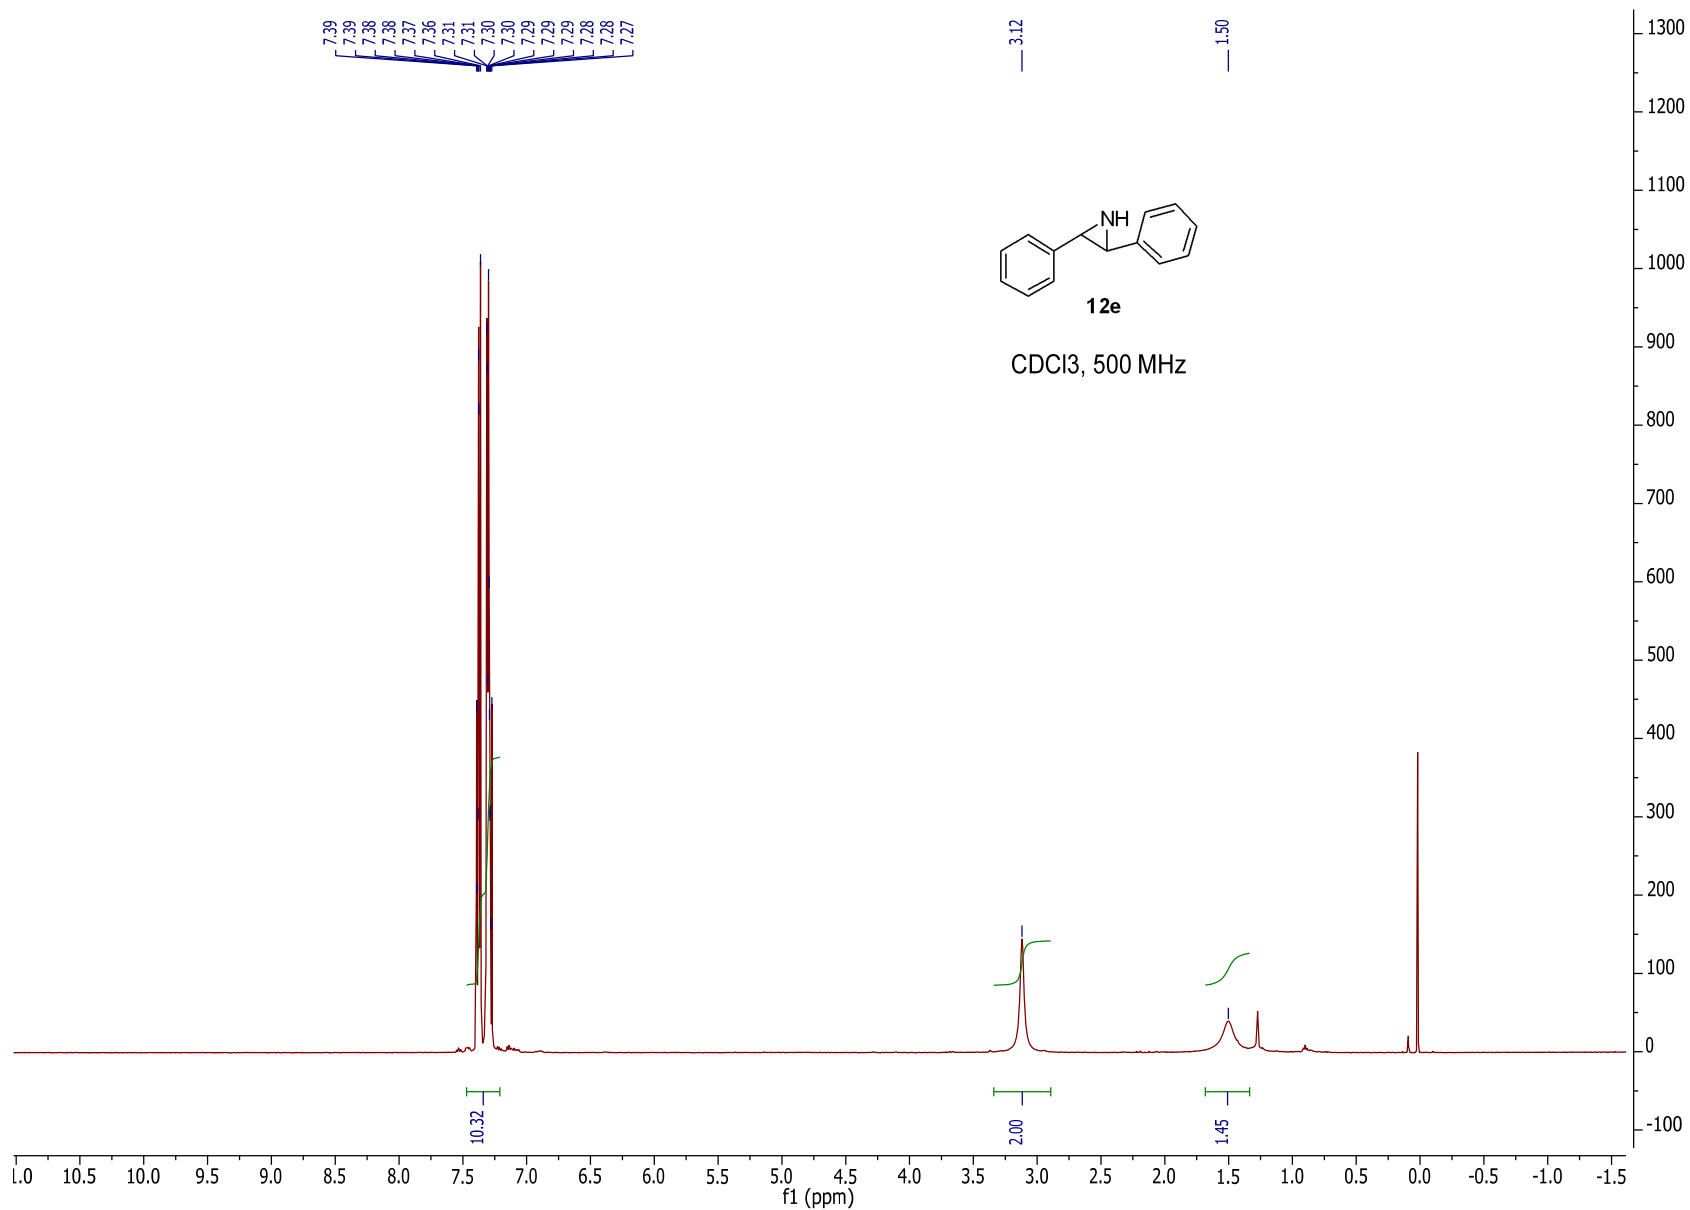

SI-174

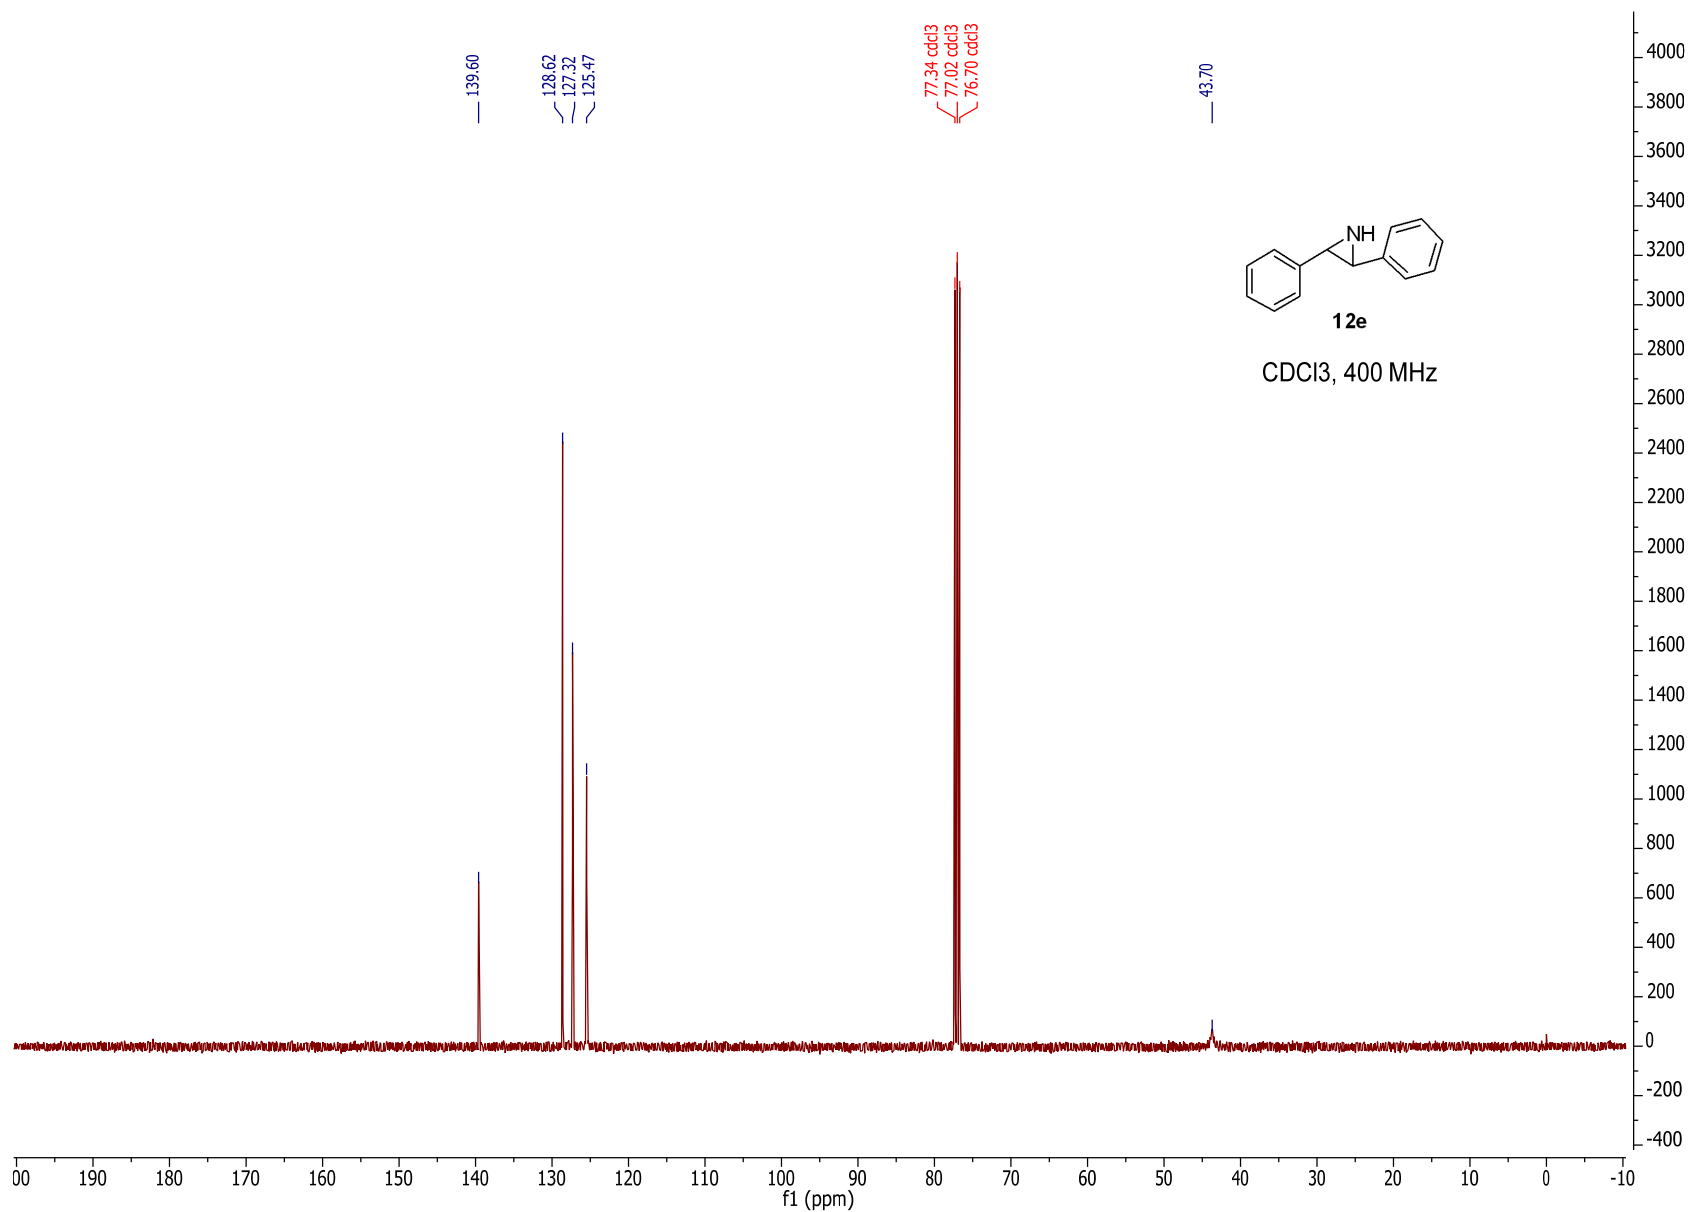

SI-175

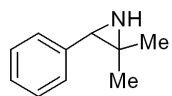

12f

CDCl<sub>3</sub>, 500 MHz

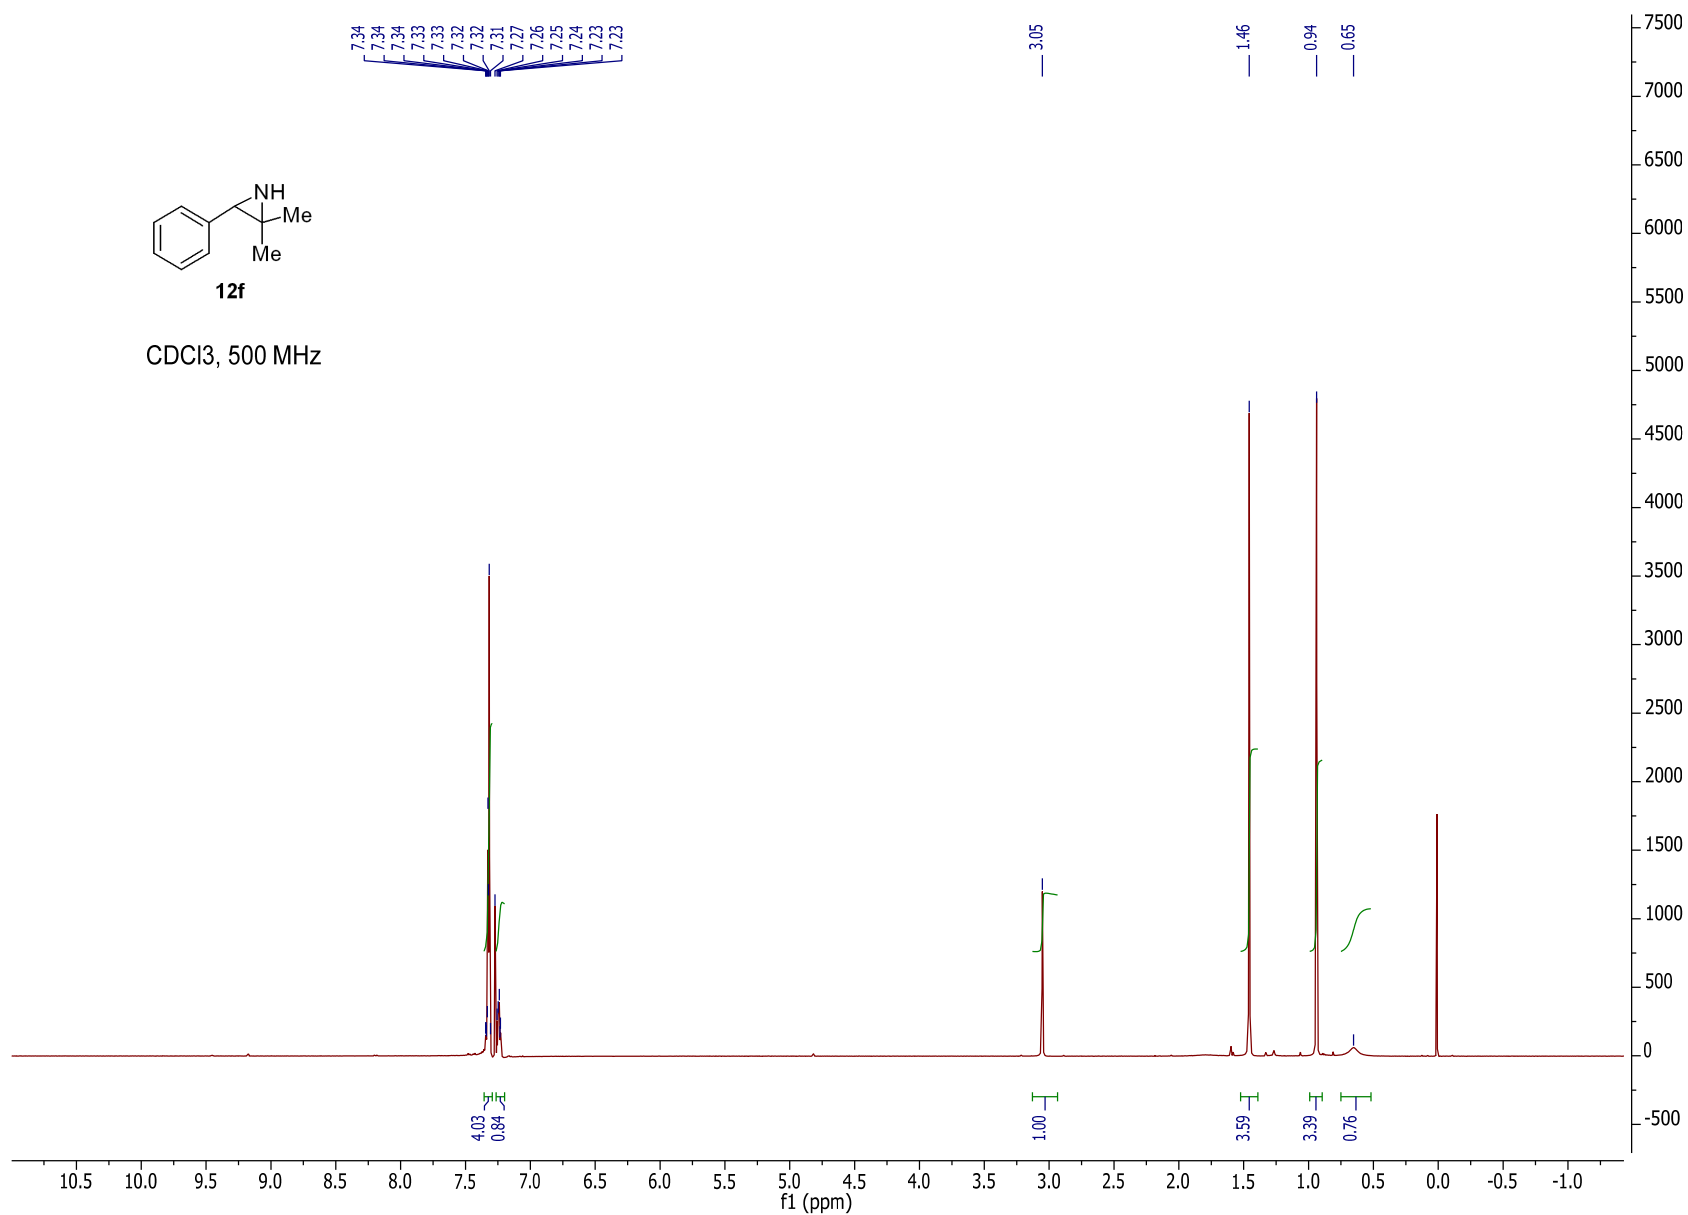



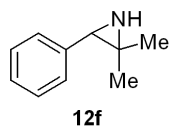

CDCl<sub>3</sub>, 500 MHz

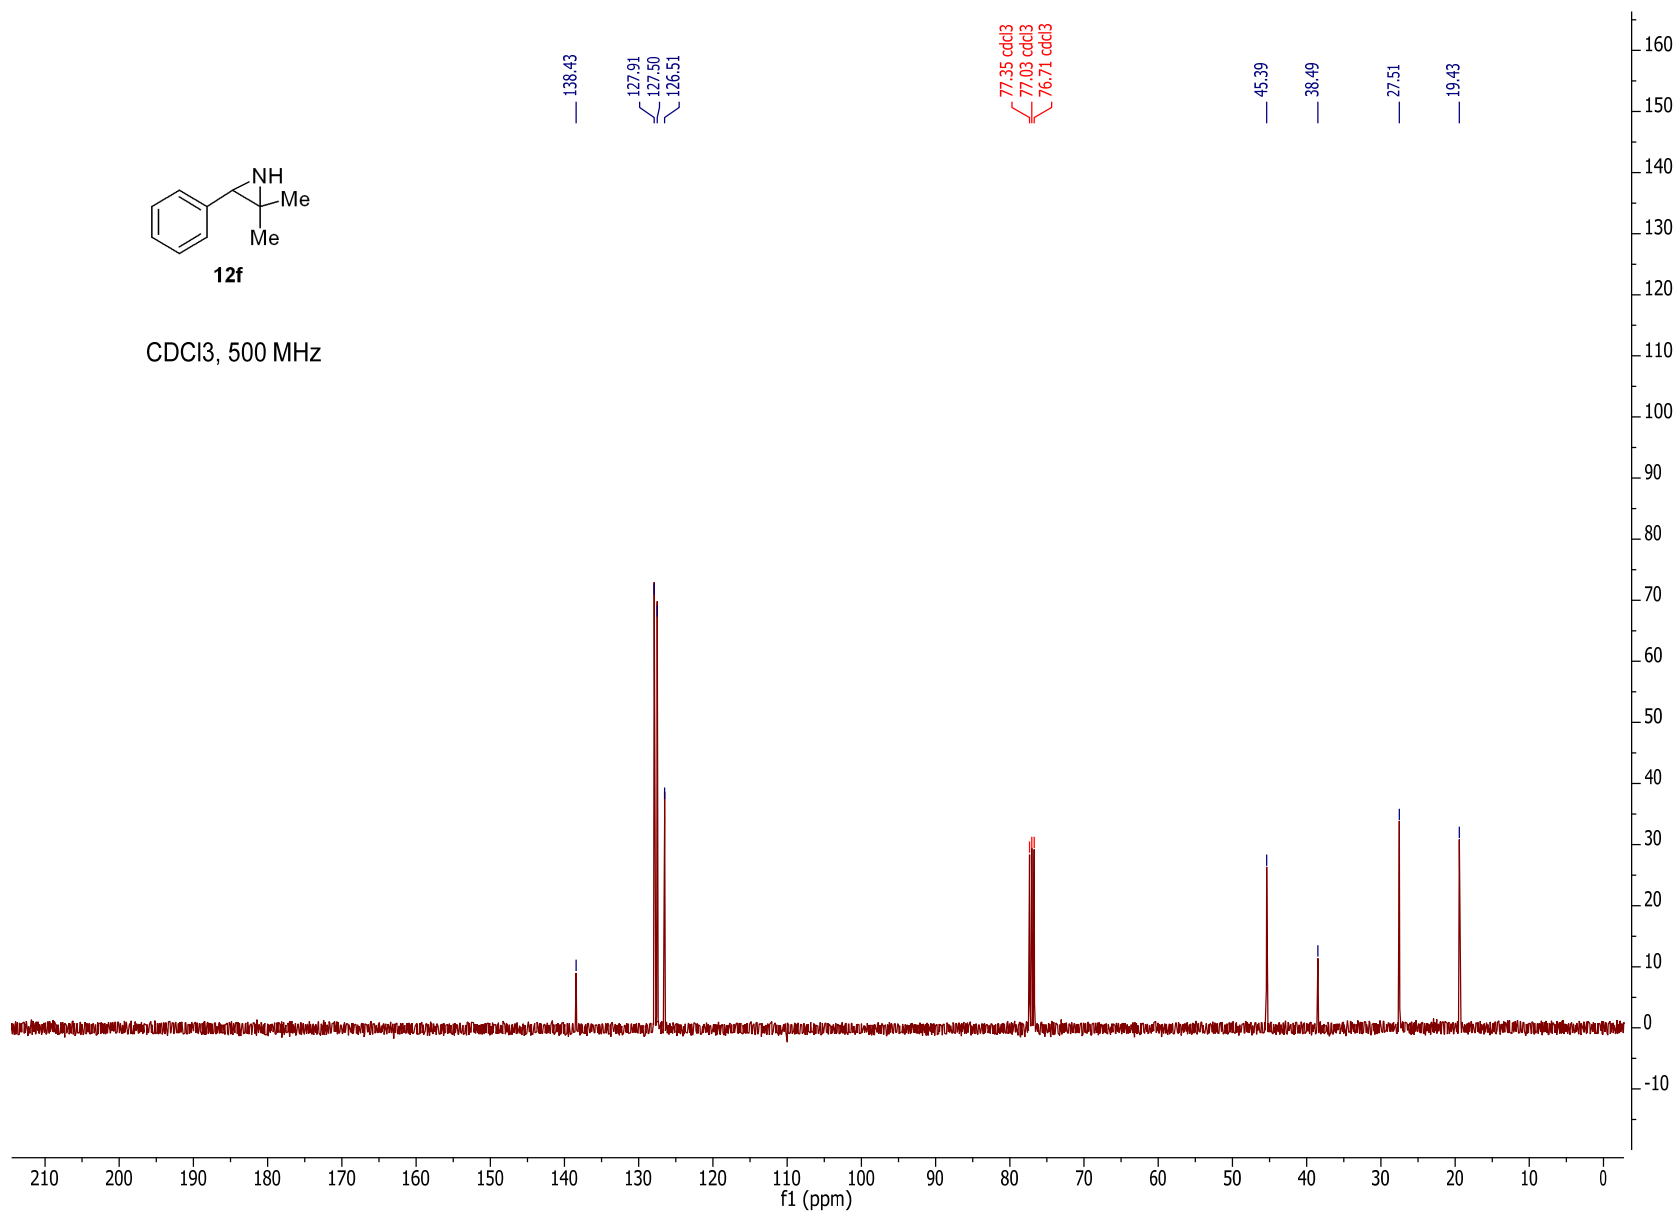

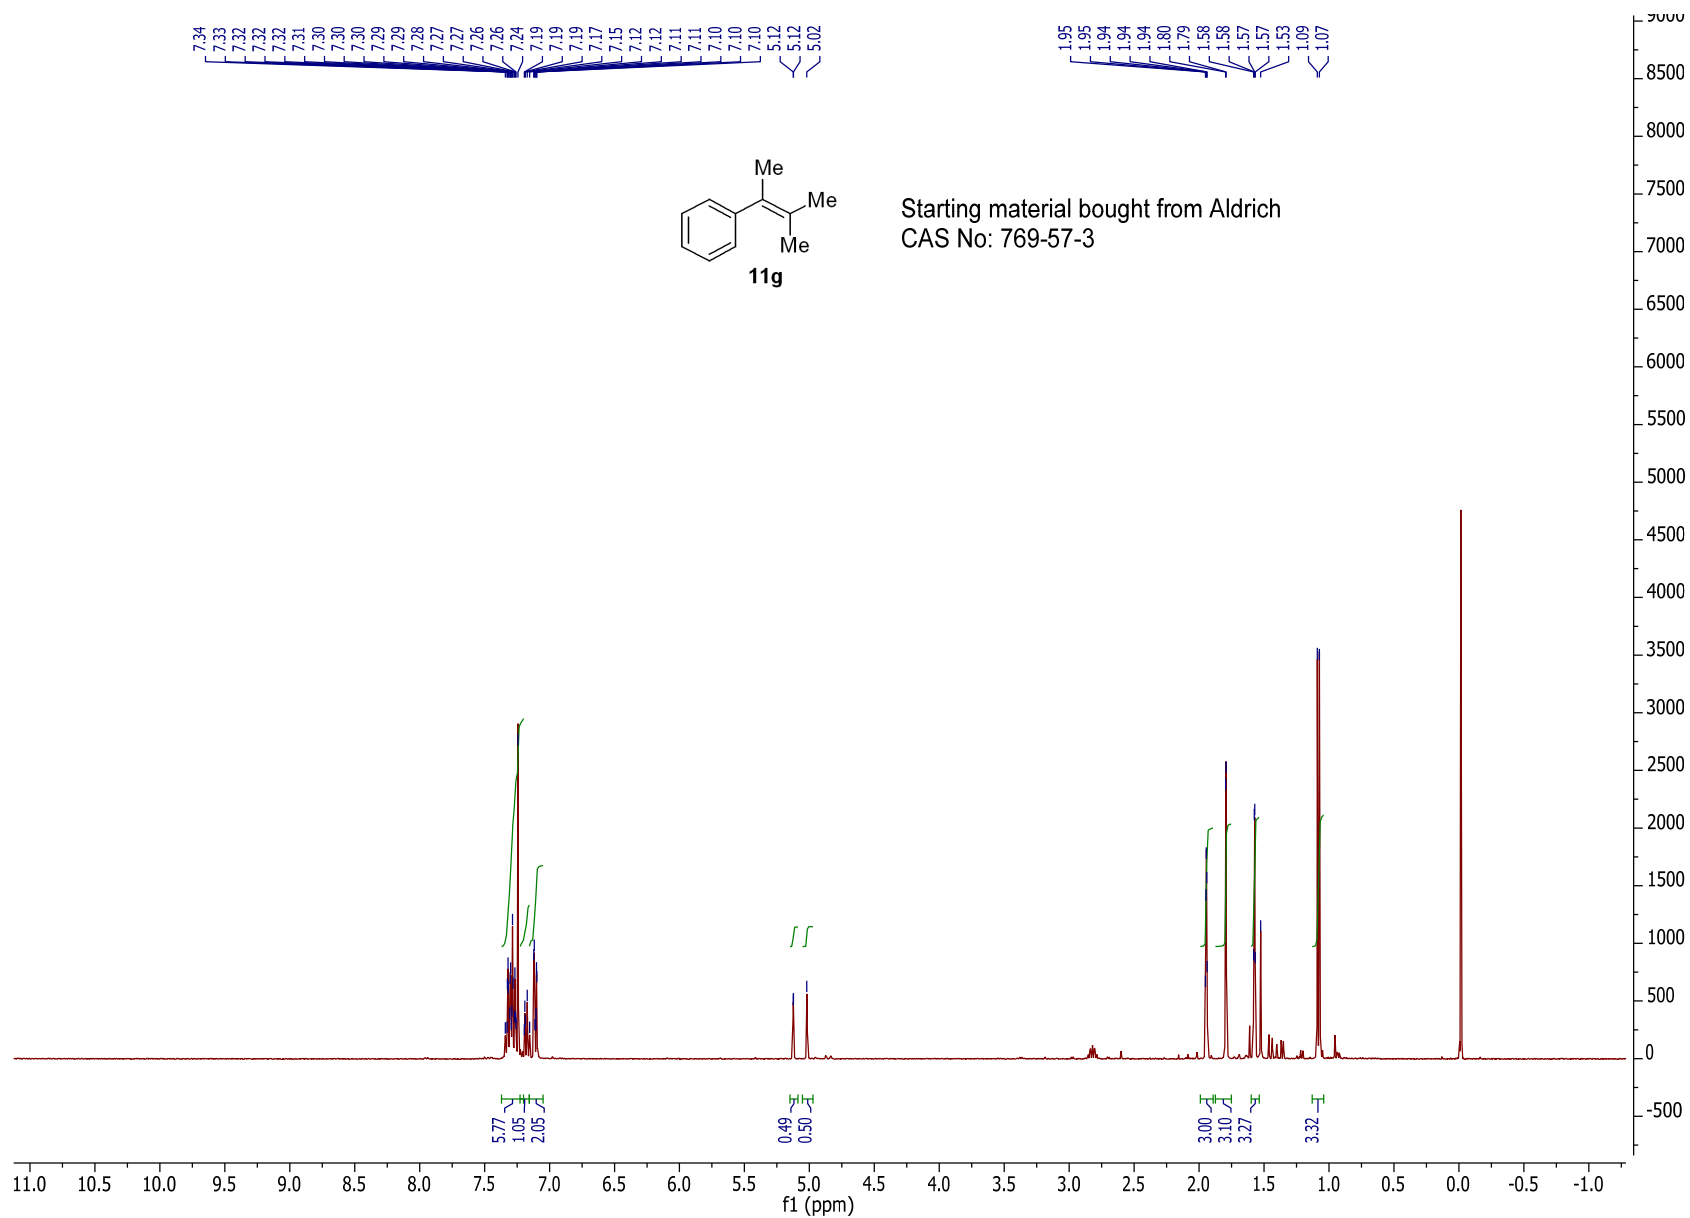

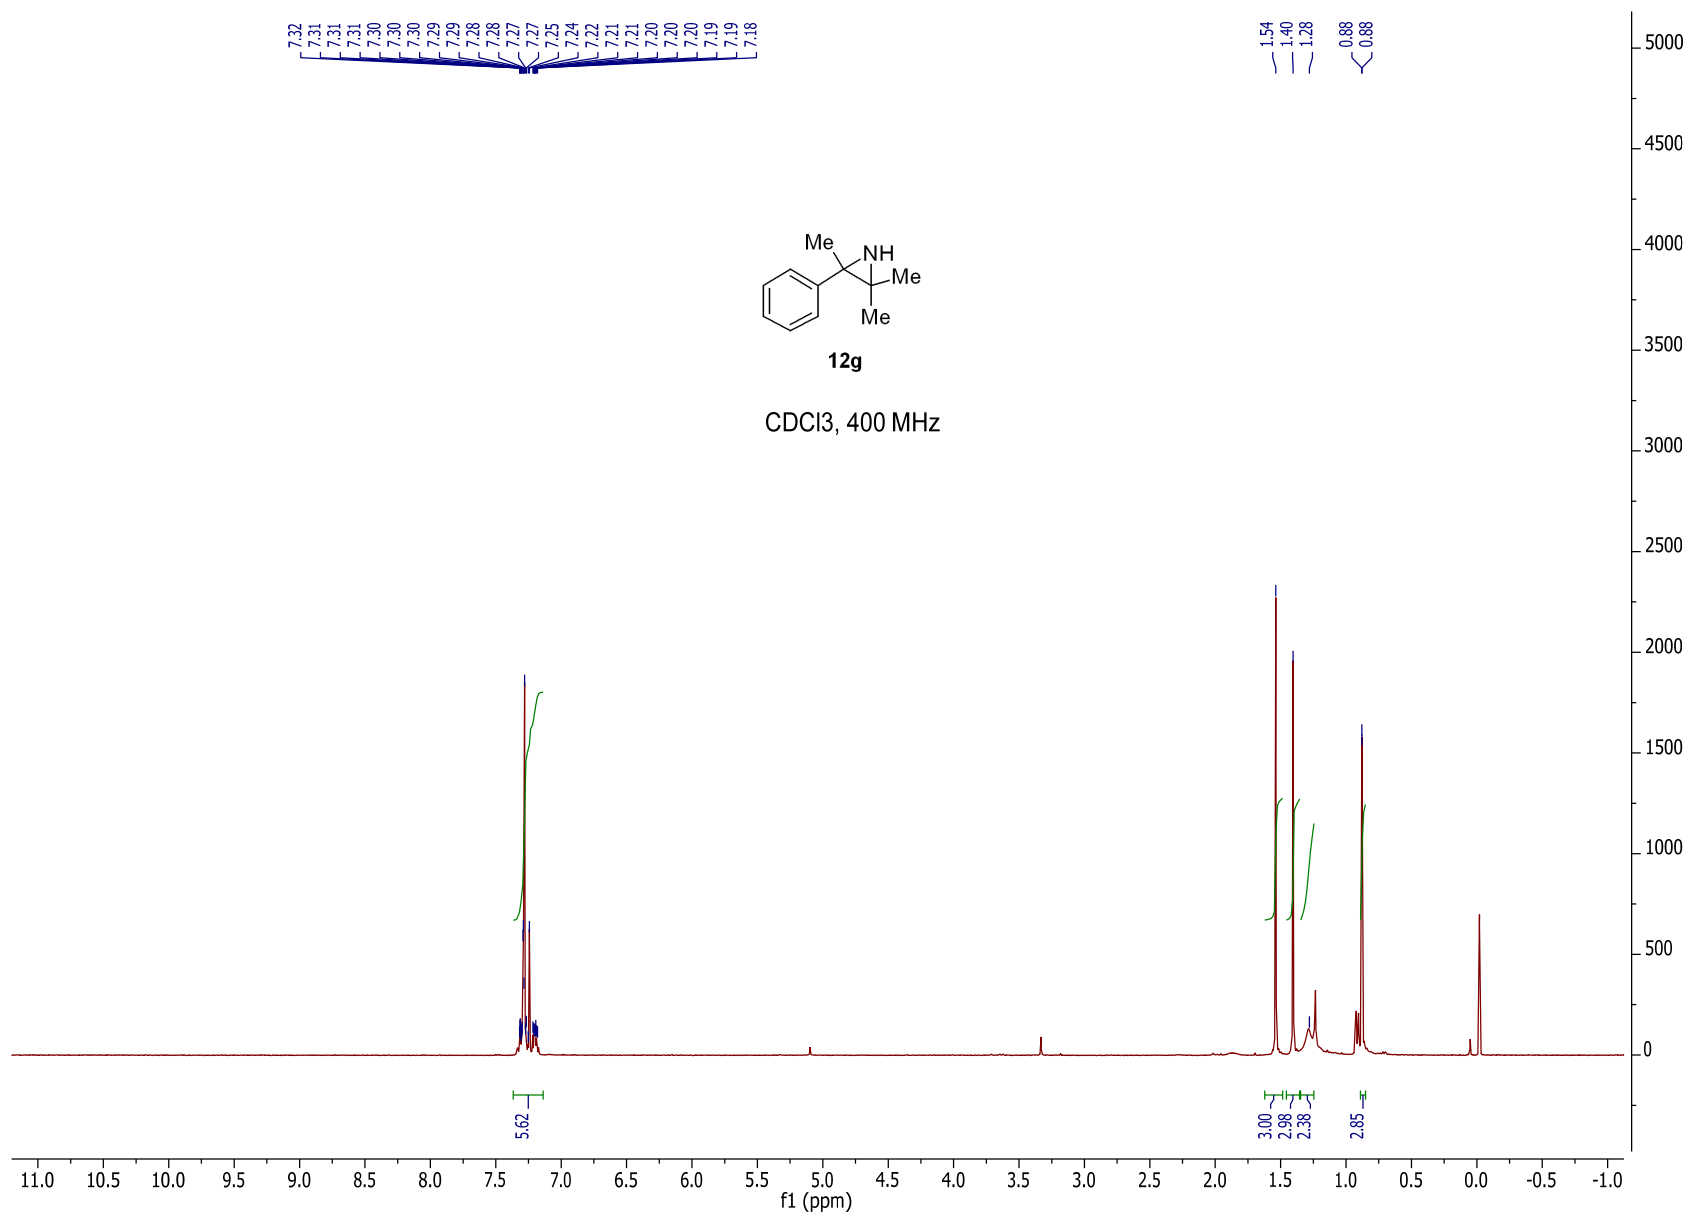

SI-179

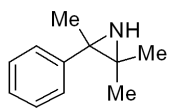

**12g**

CDCl<sub>3</sub>, 400 MHz

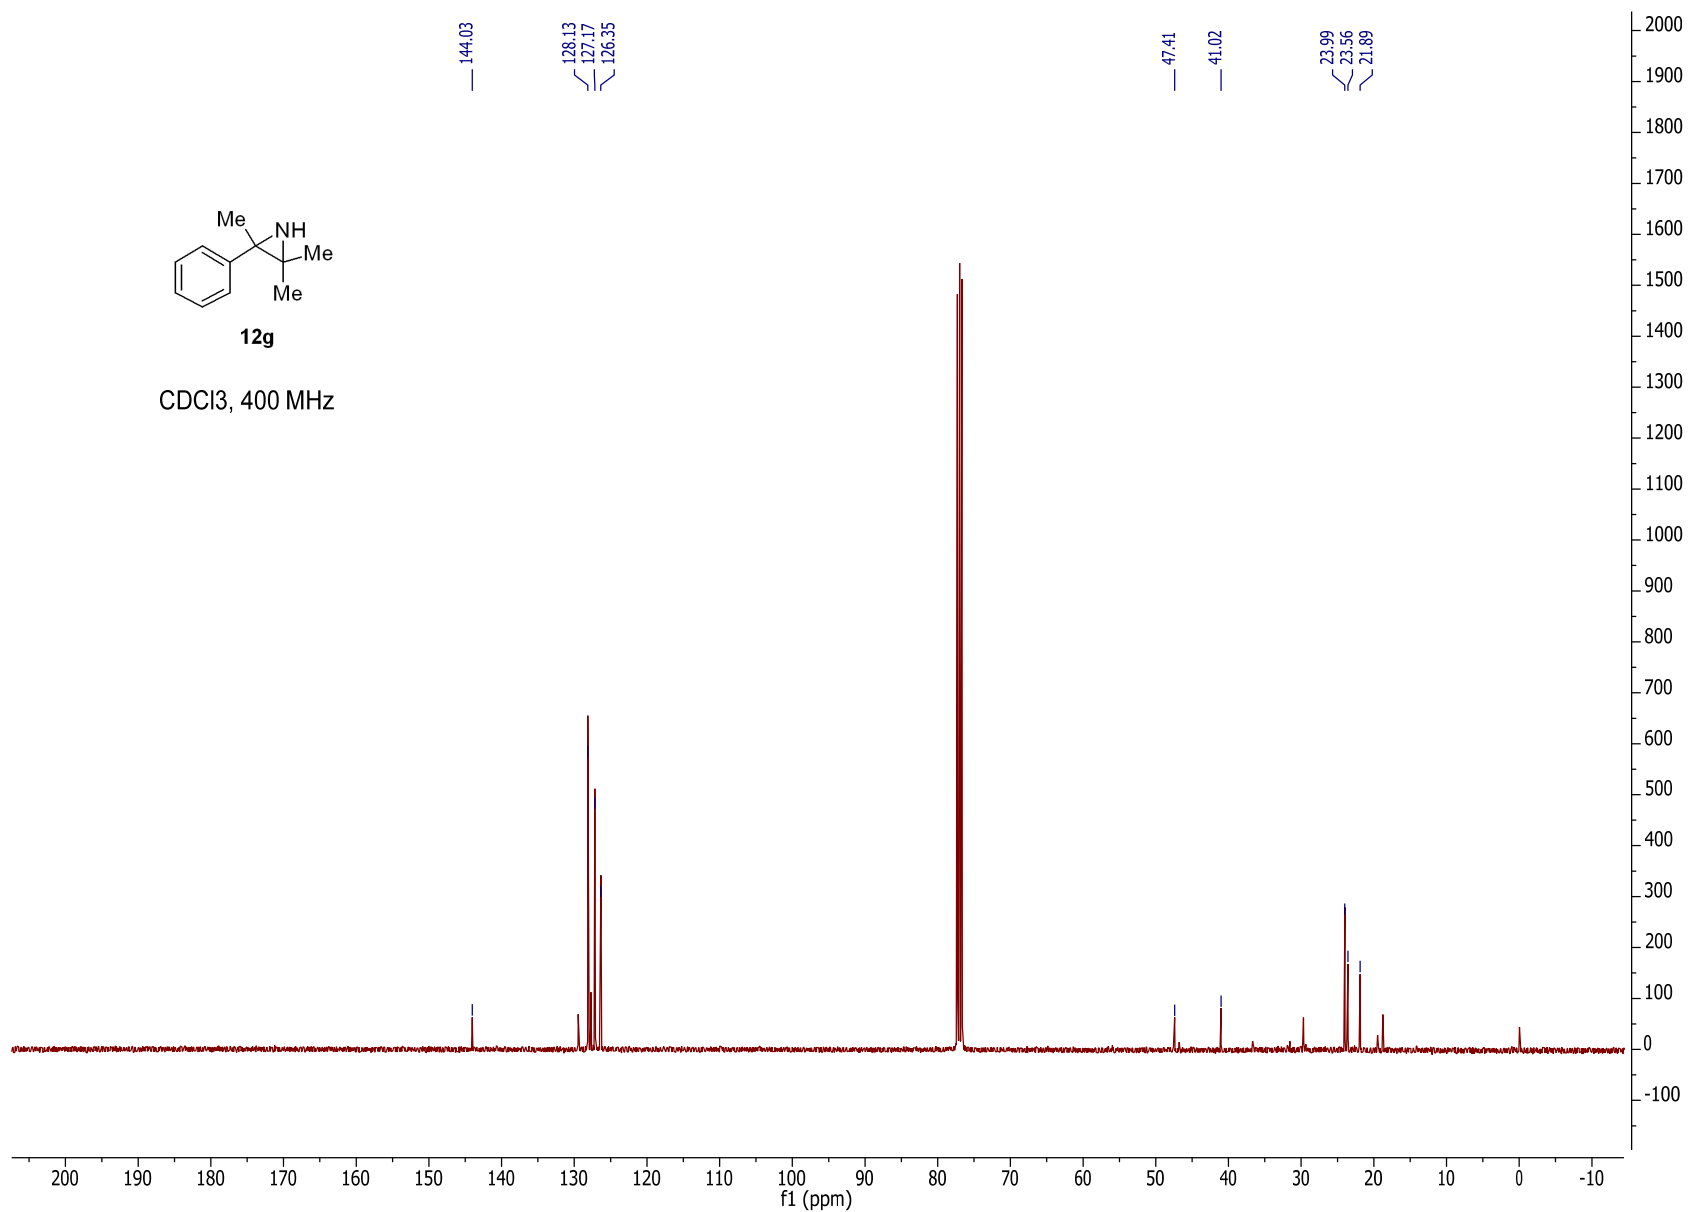

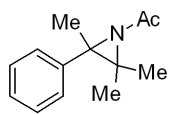

**12gg**

CDCl<sub>3</sub>, 400 MHz

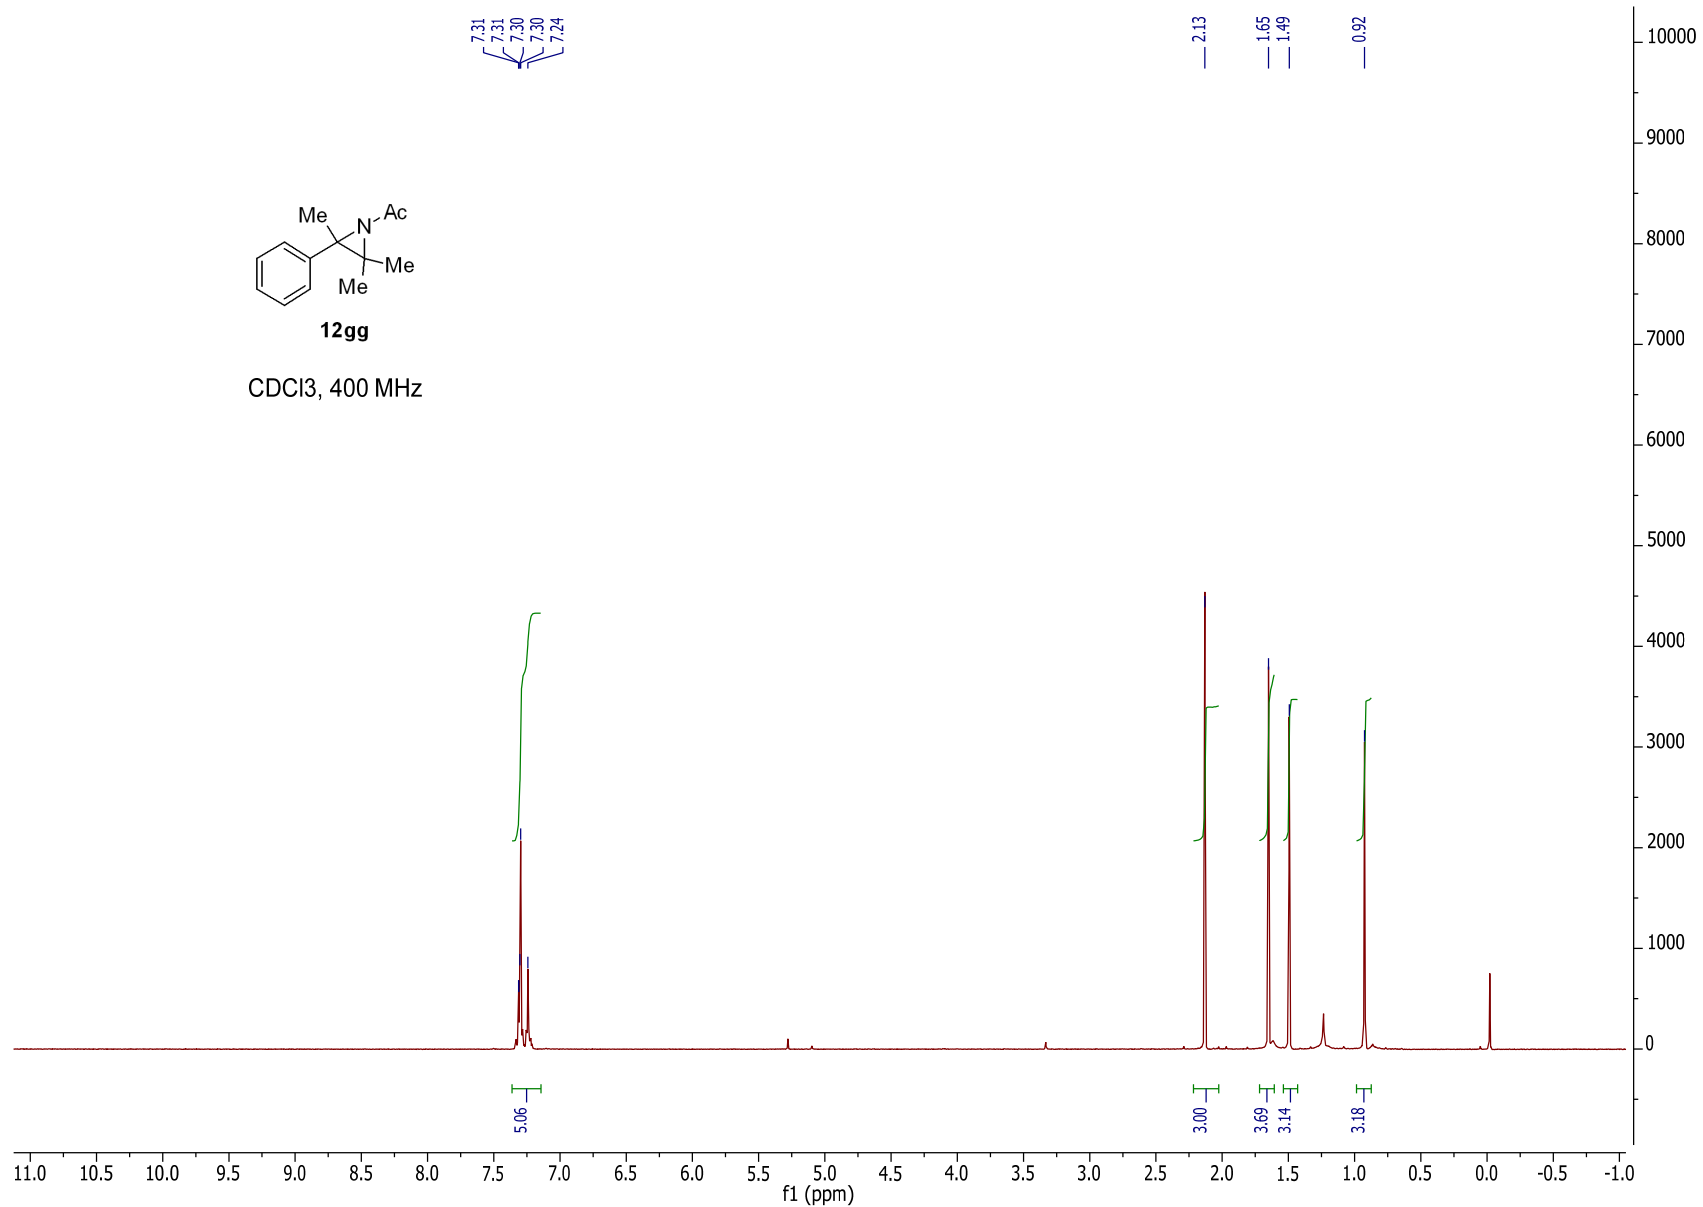

SI-181

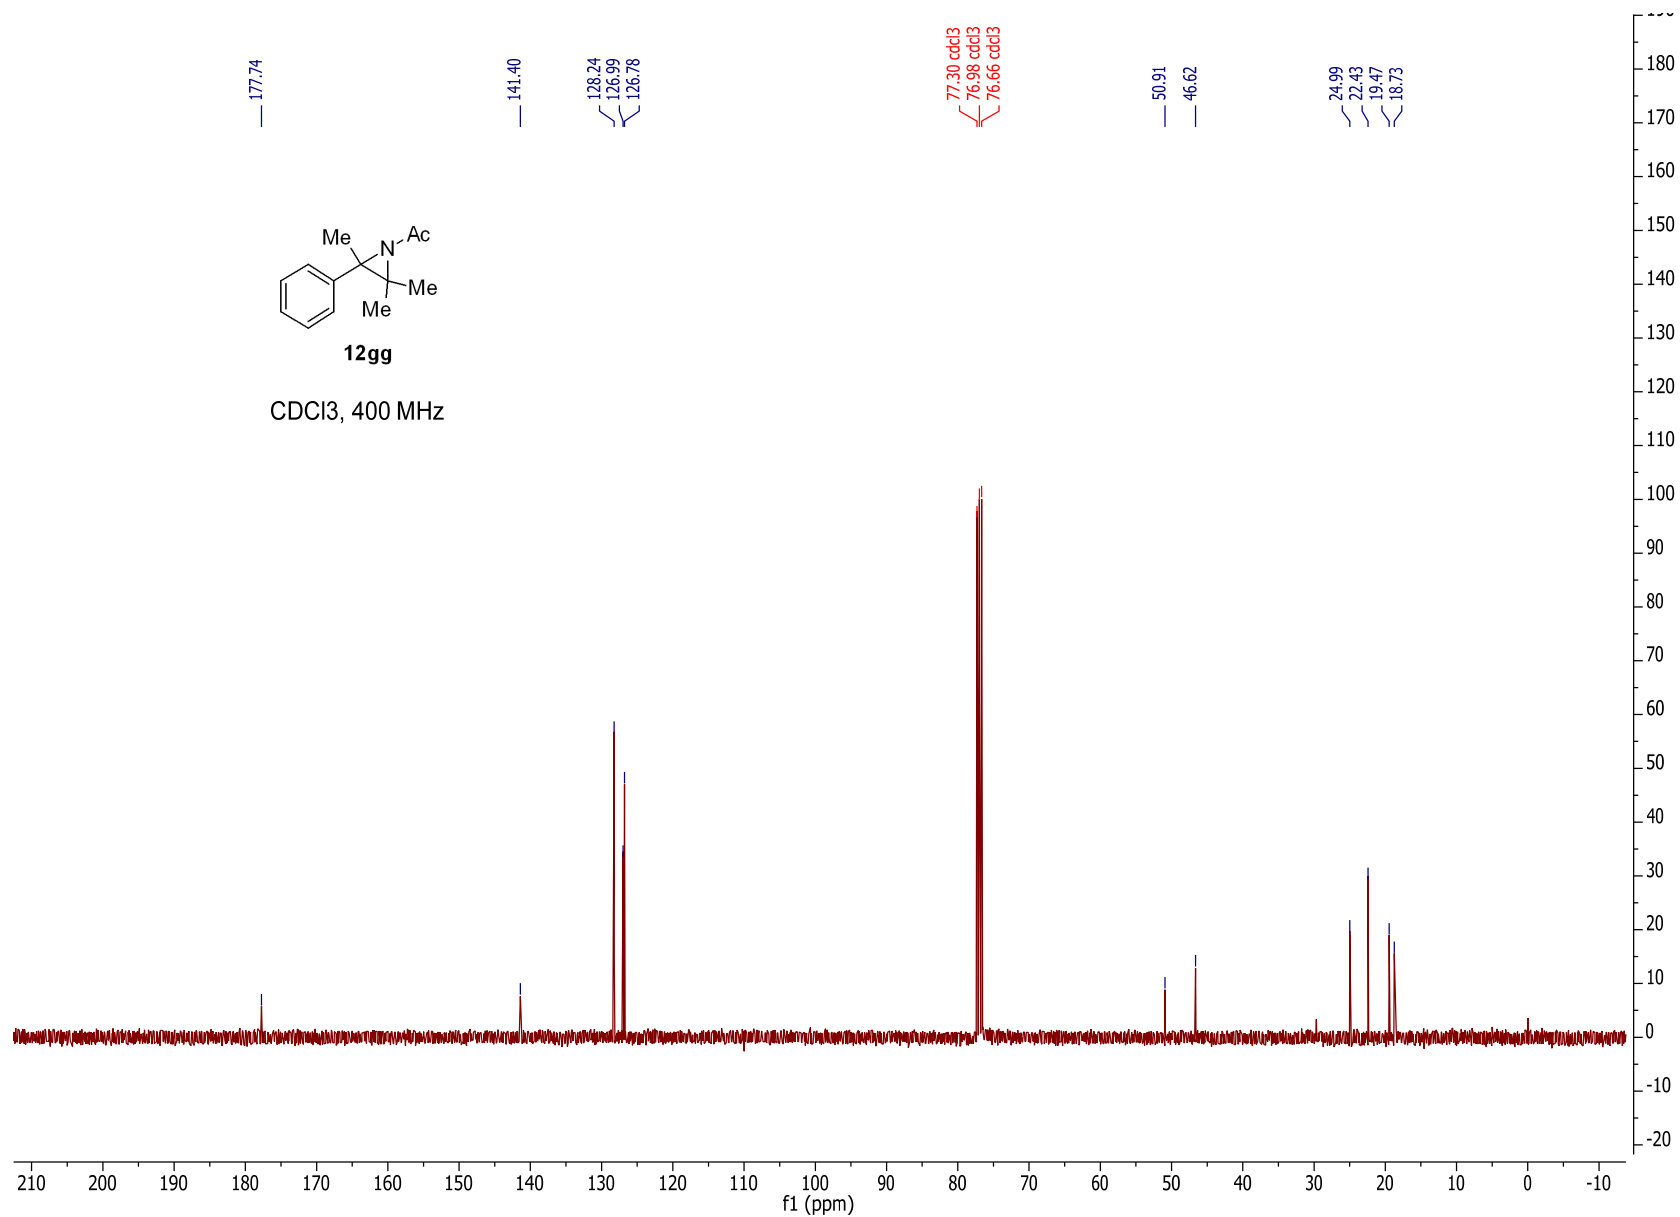

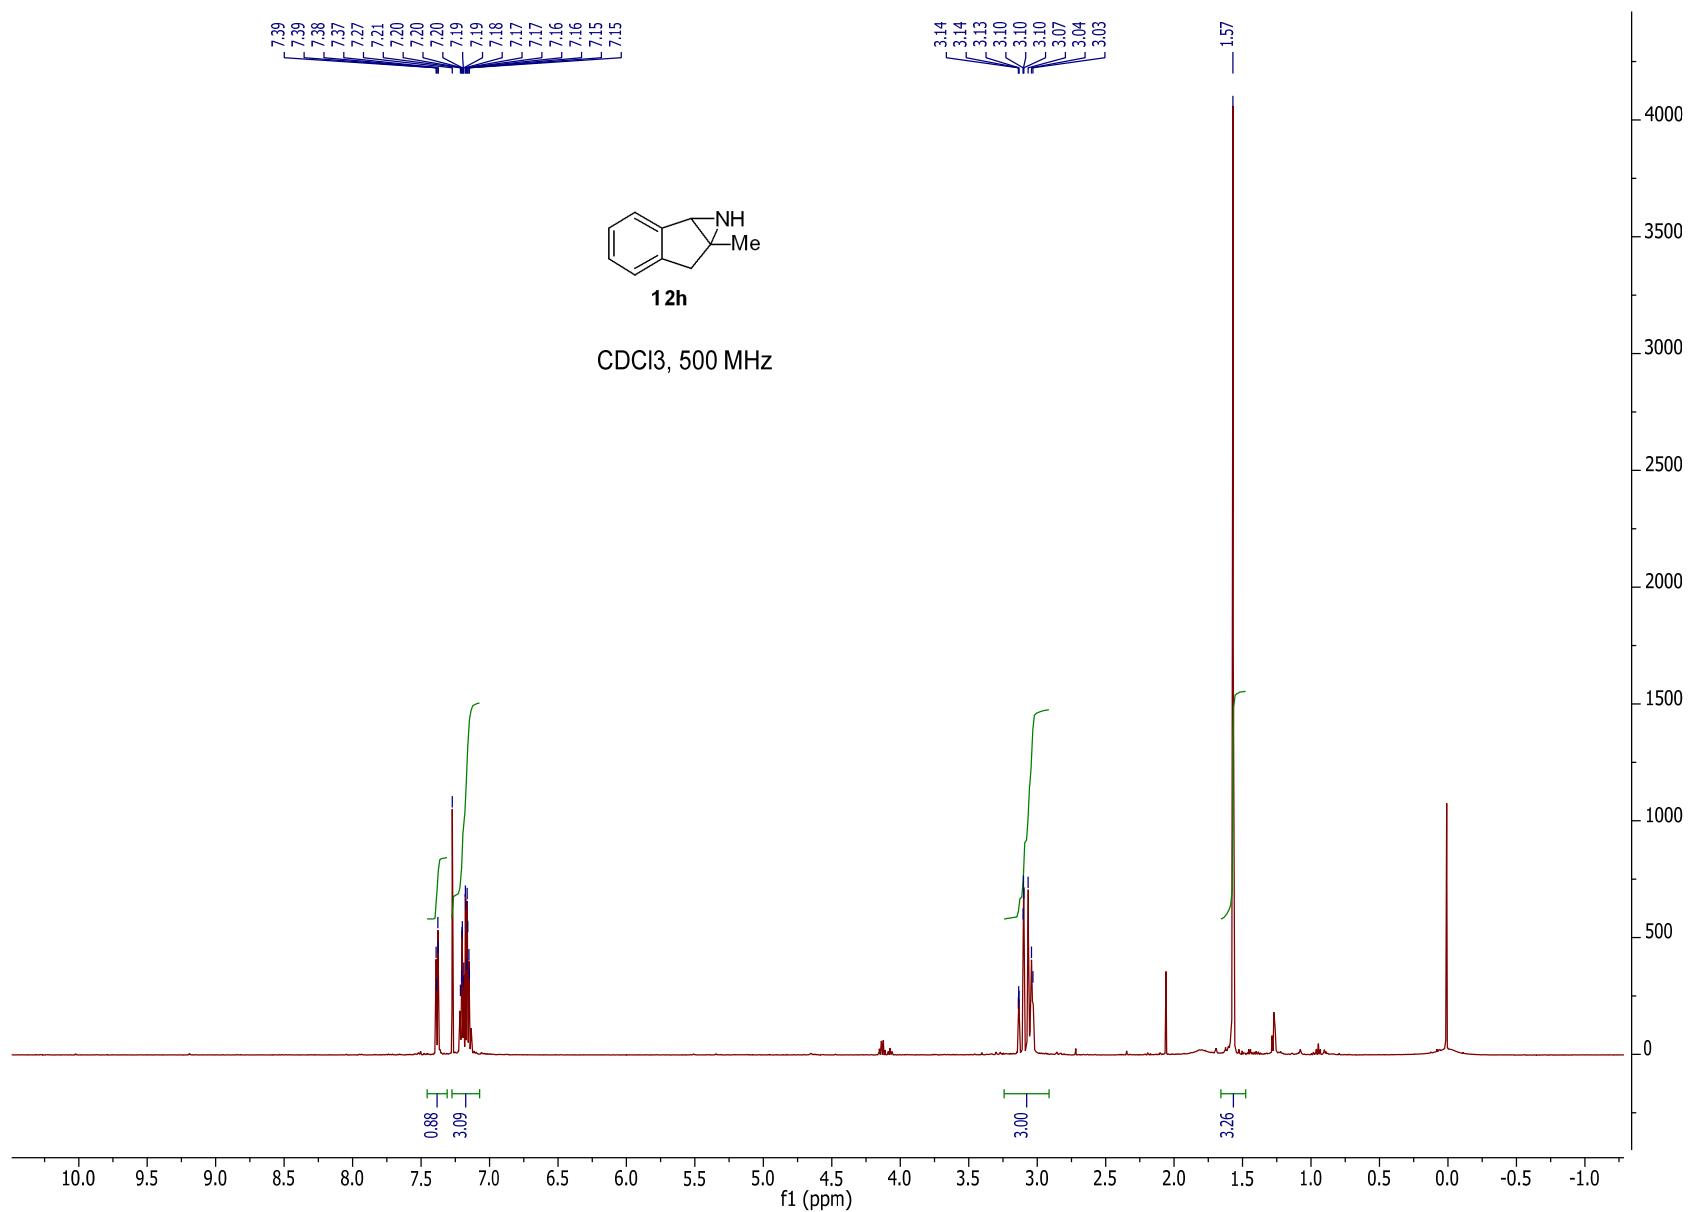

SI-183

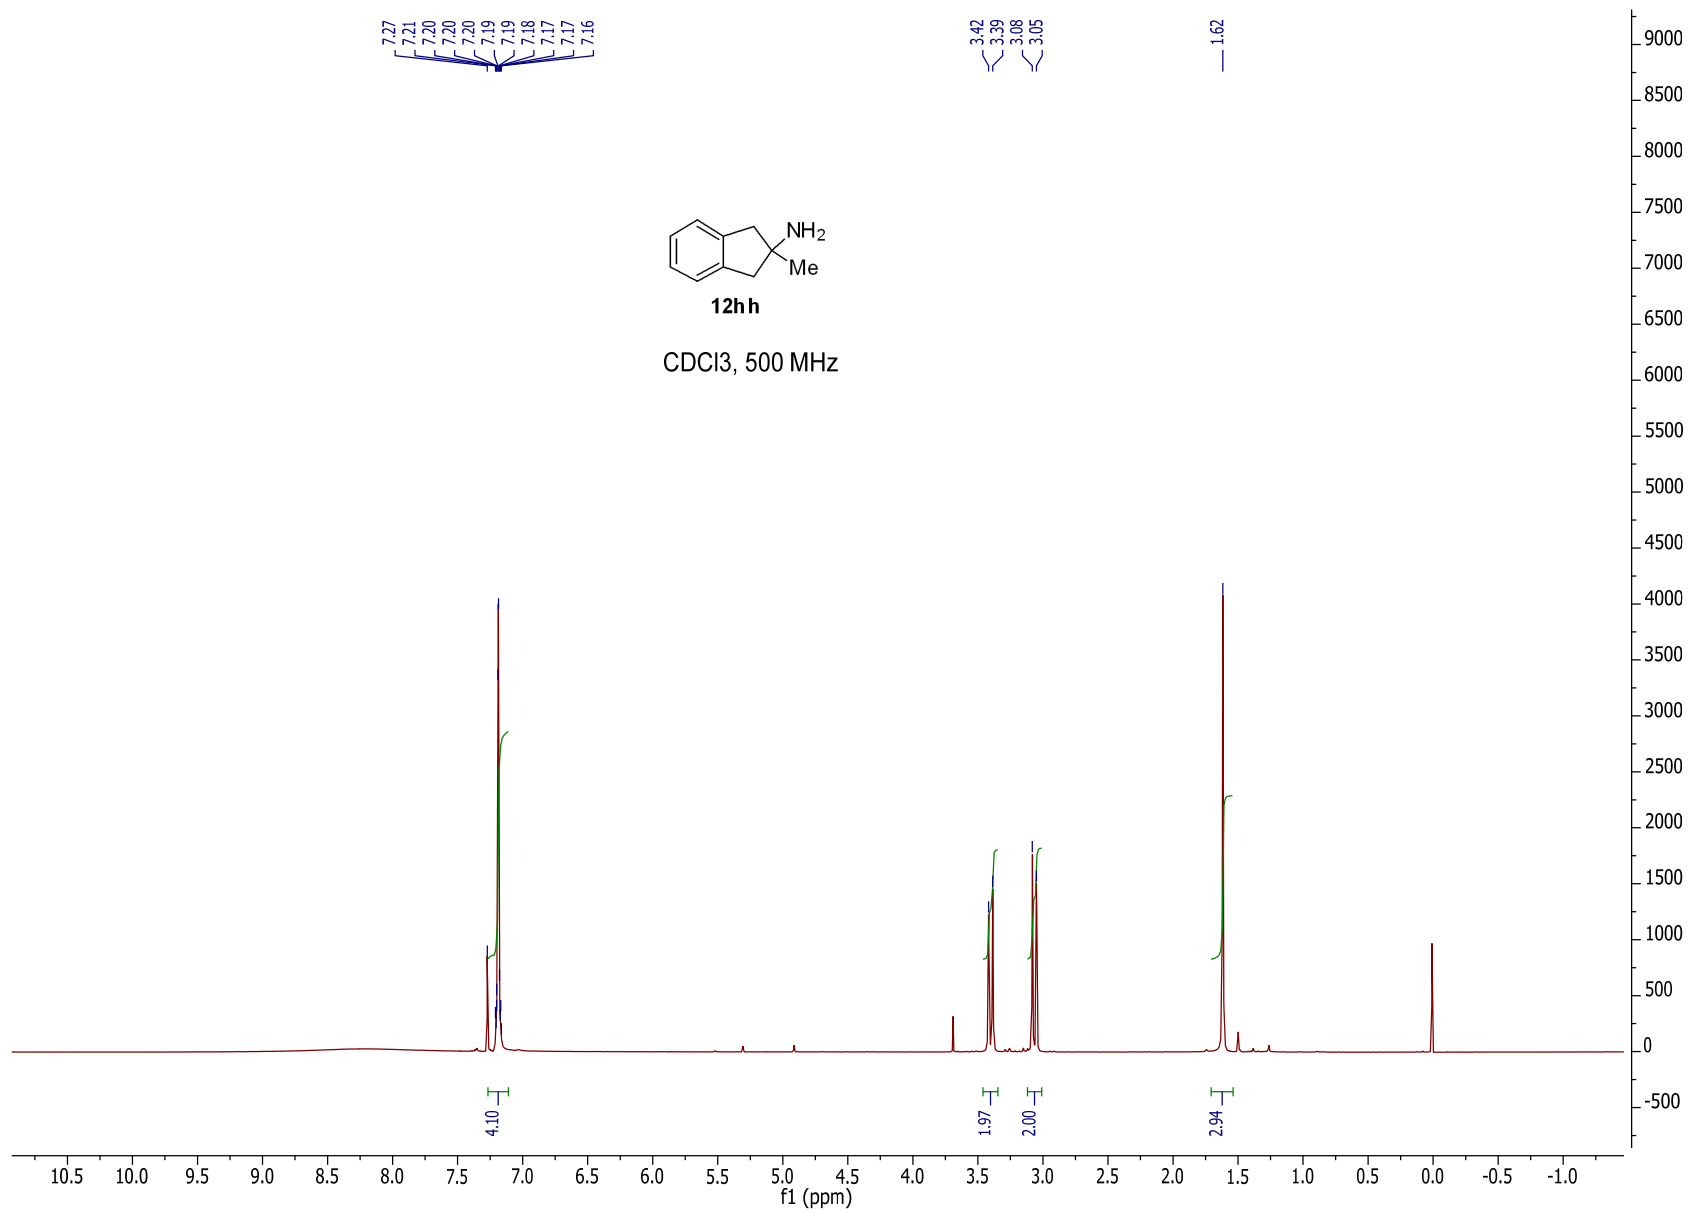



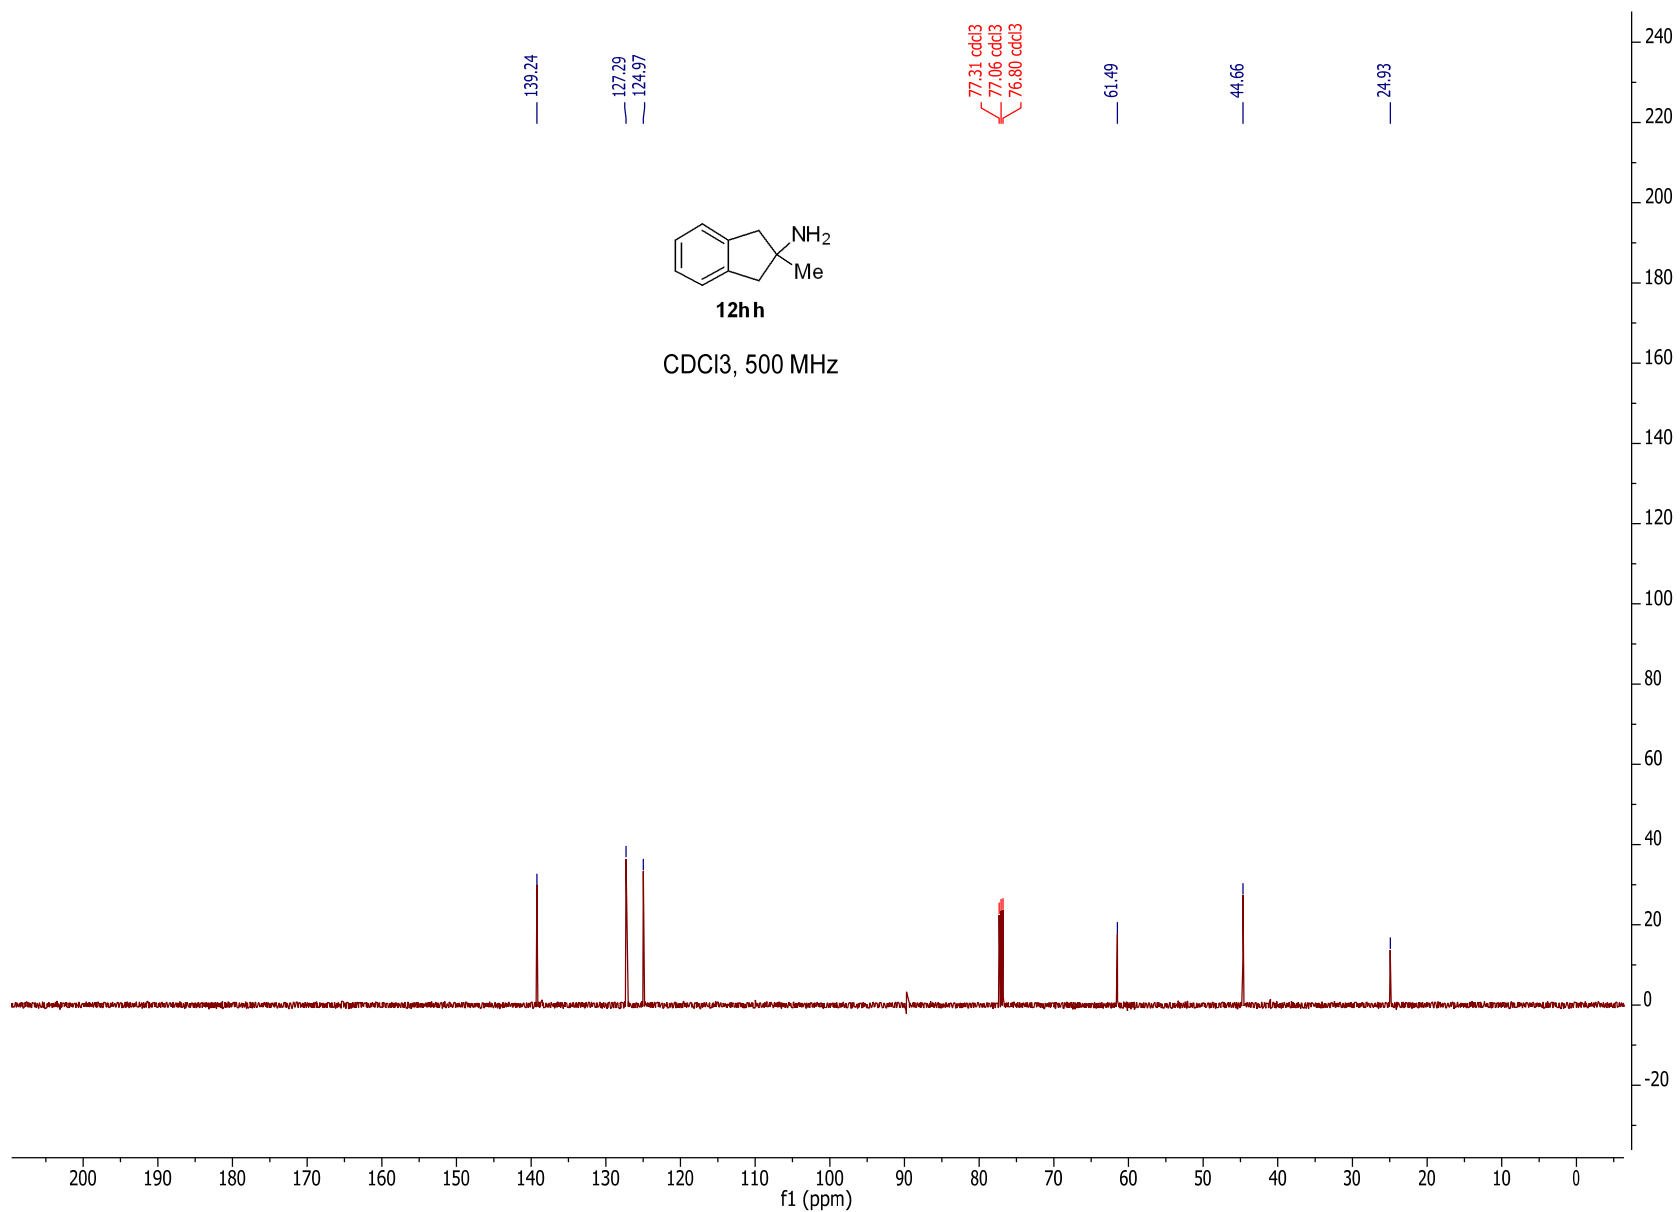

SI-185

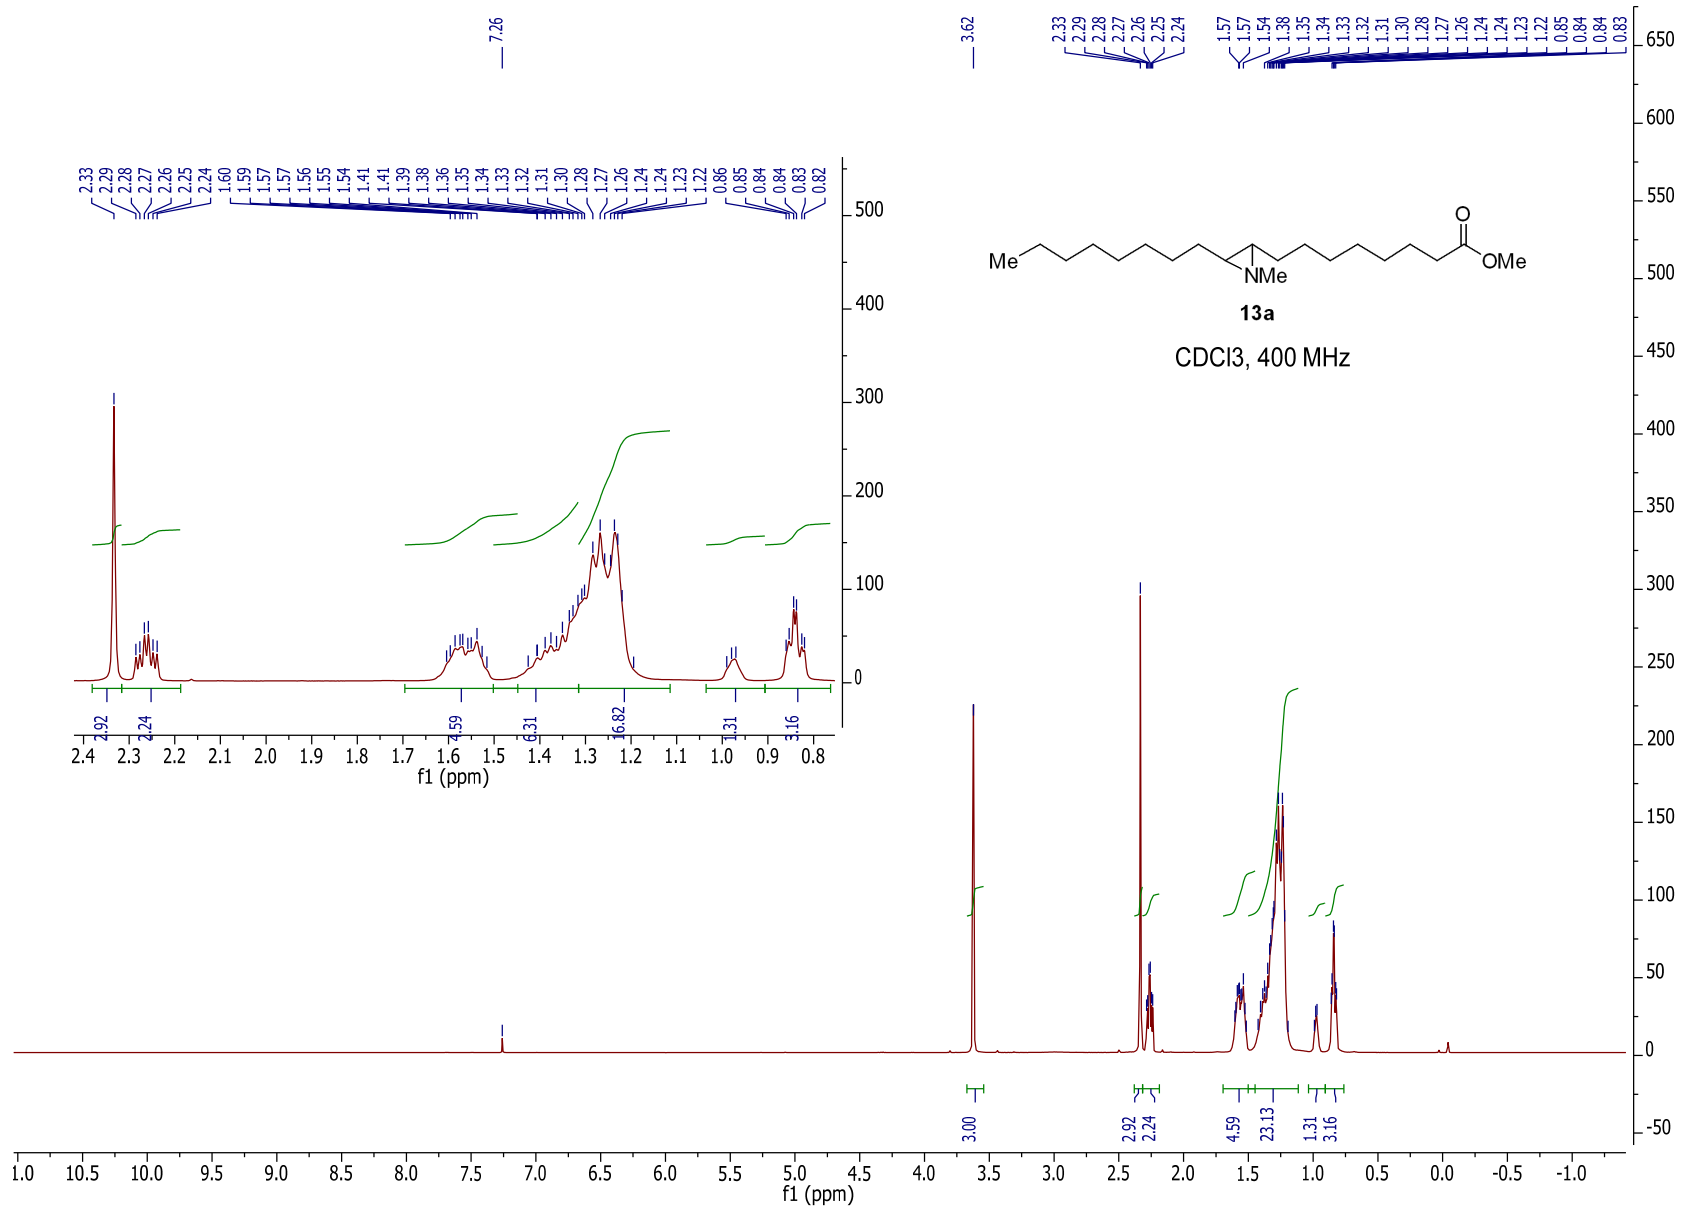

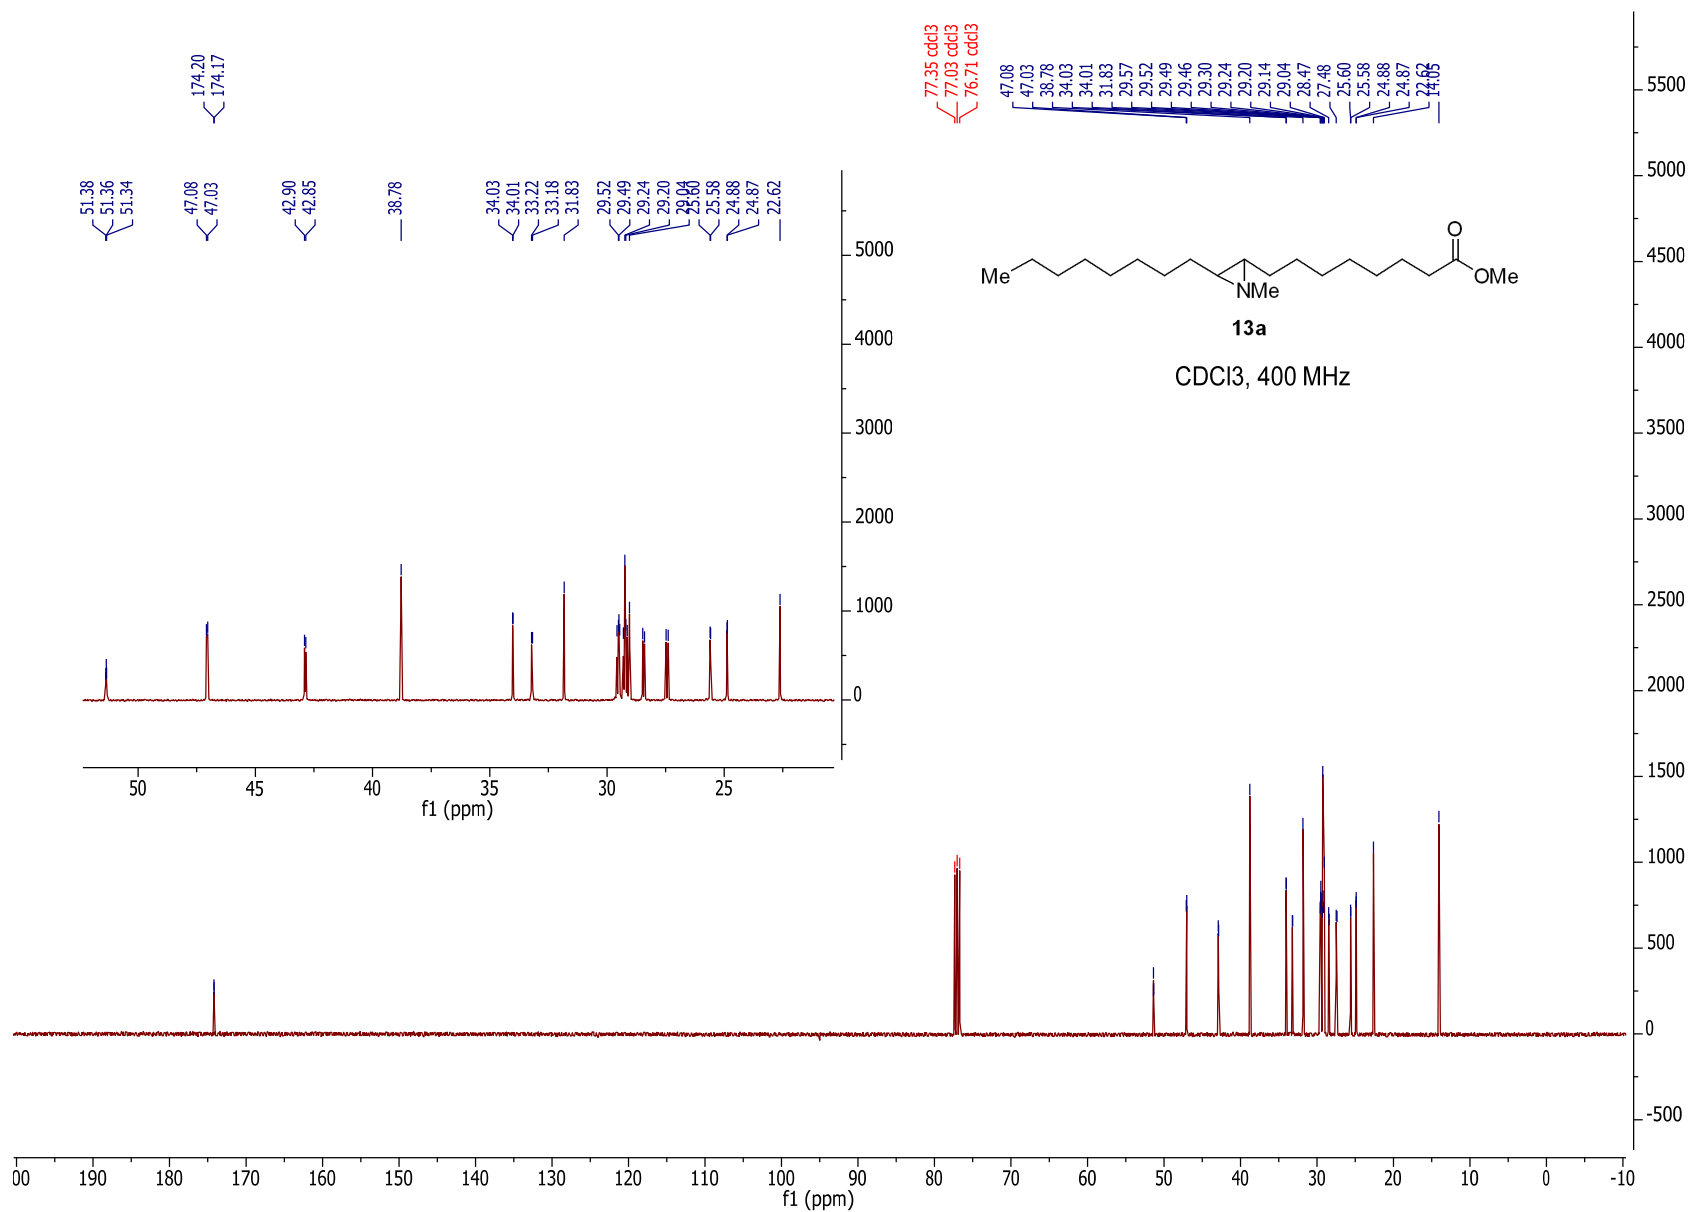

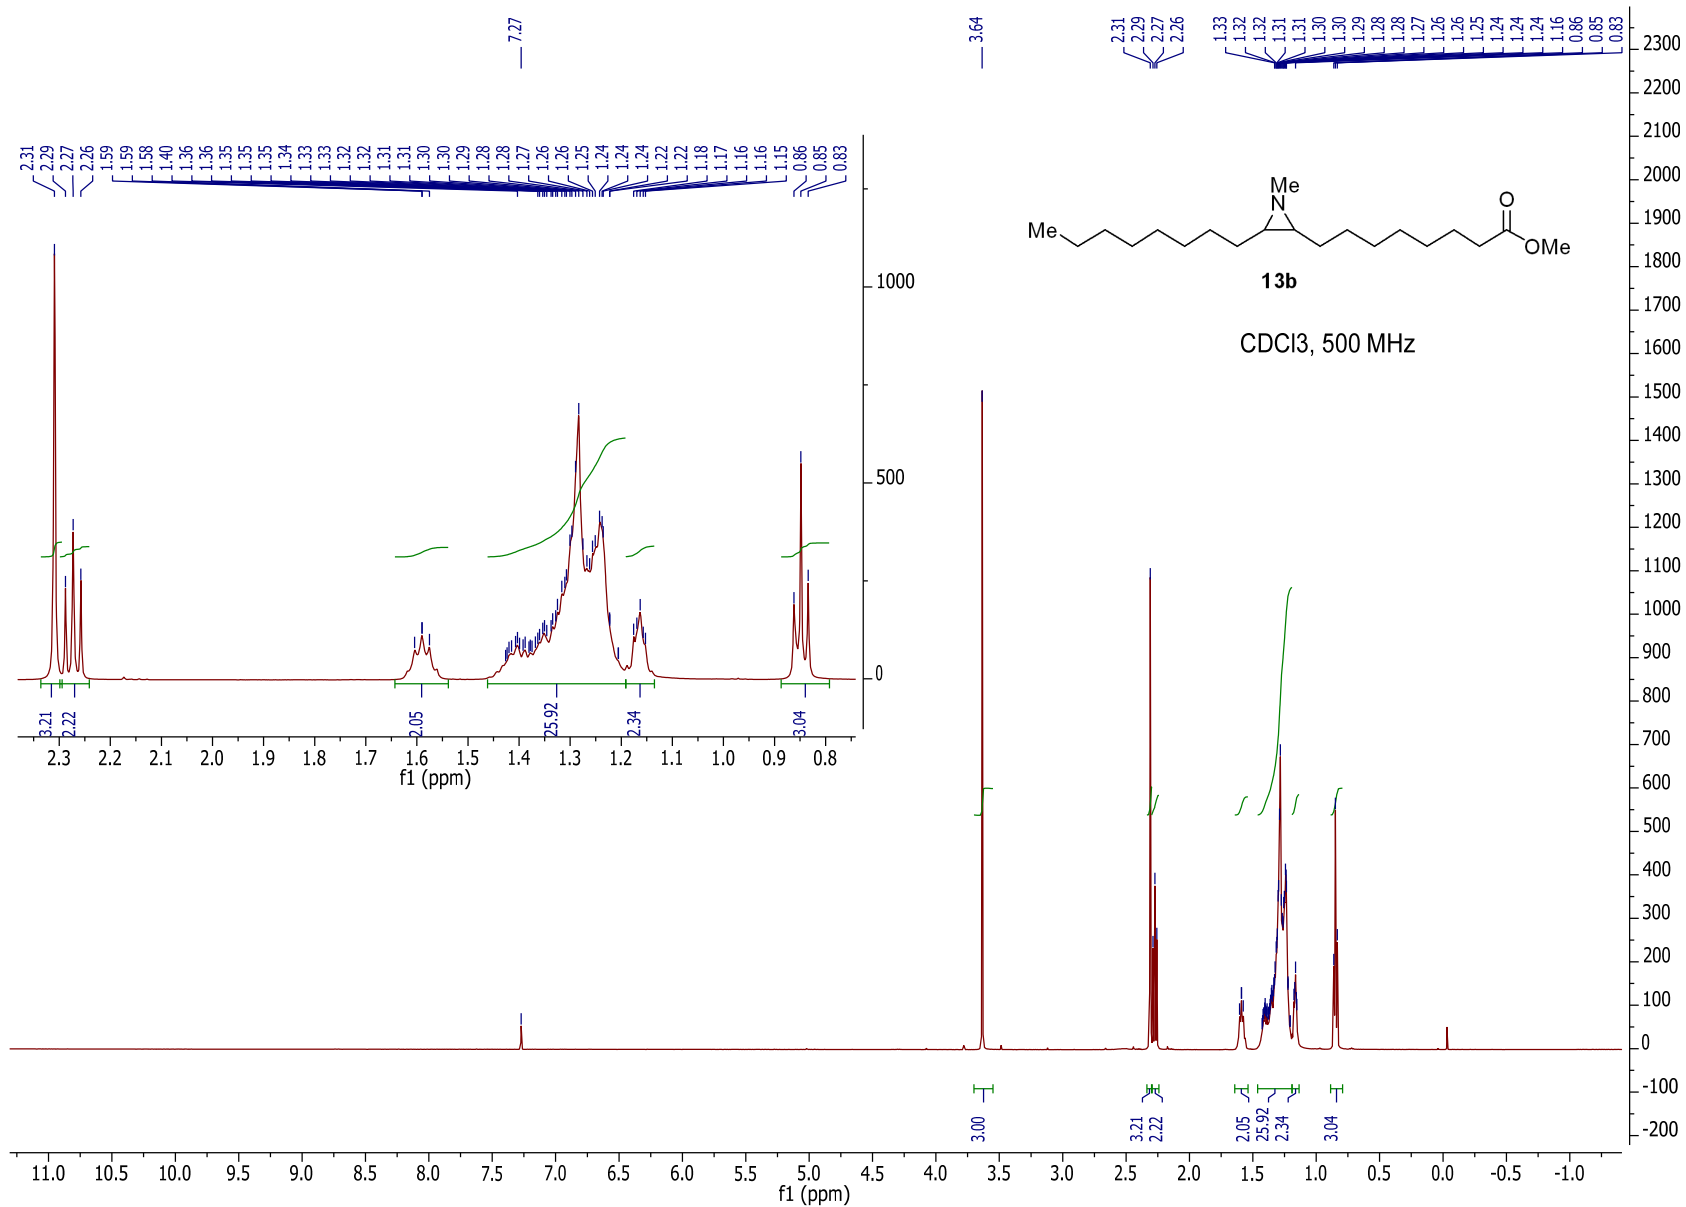

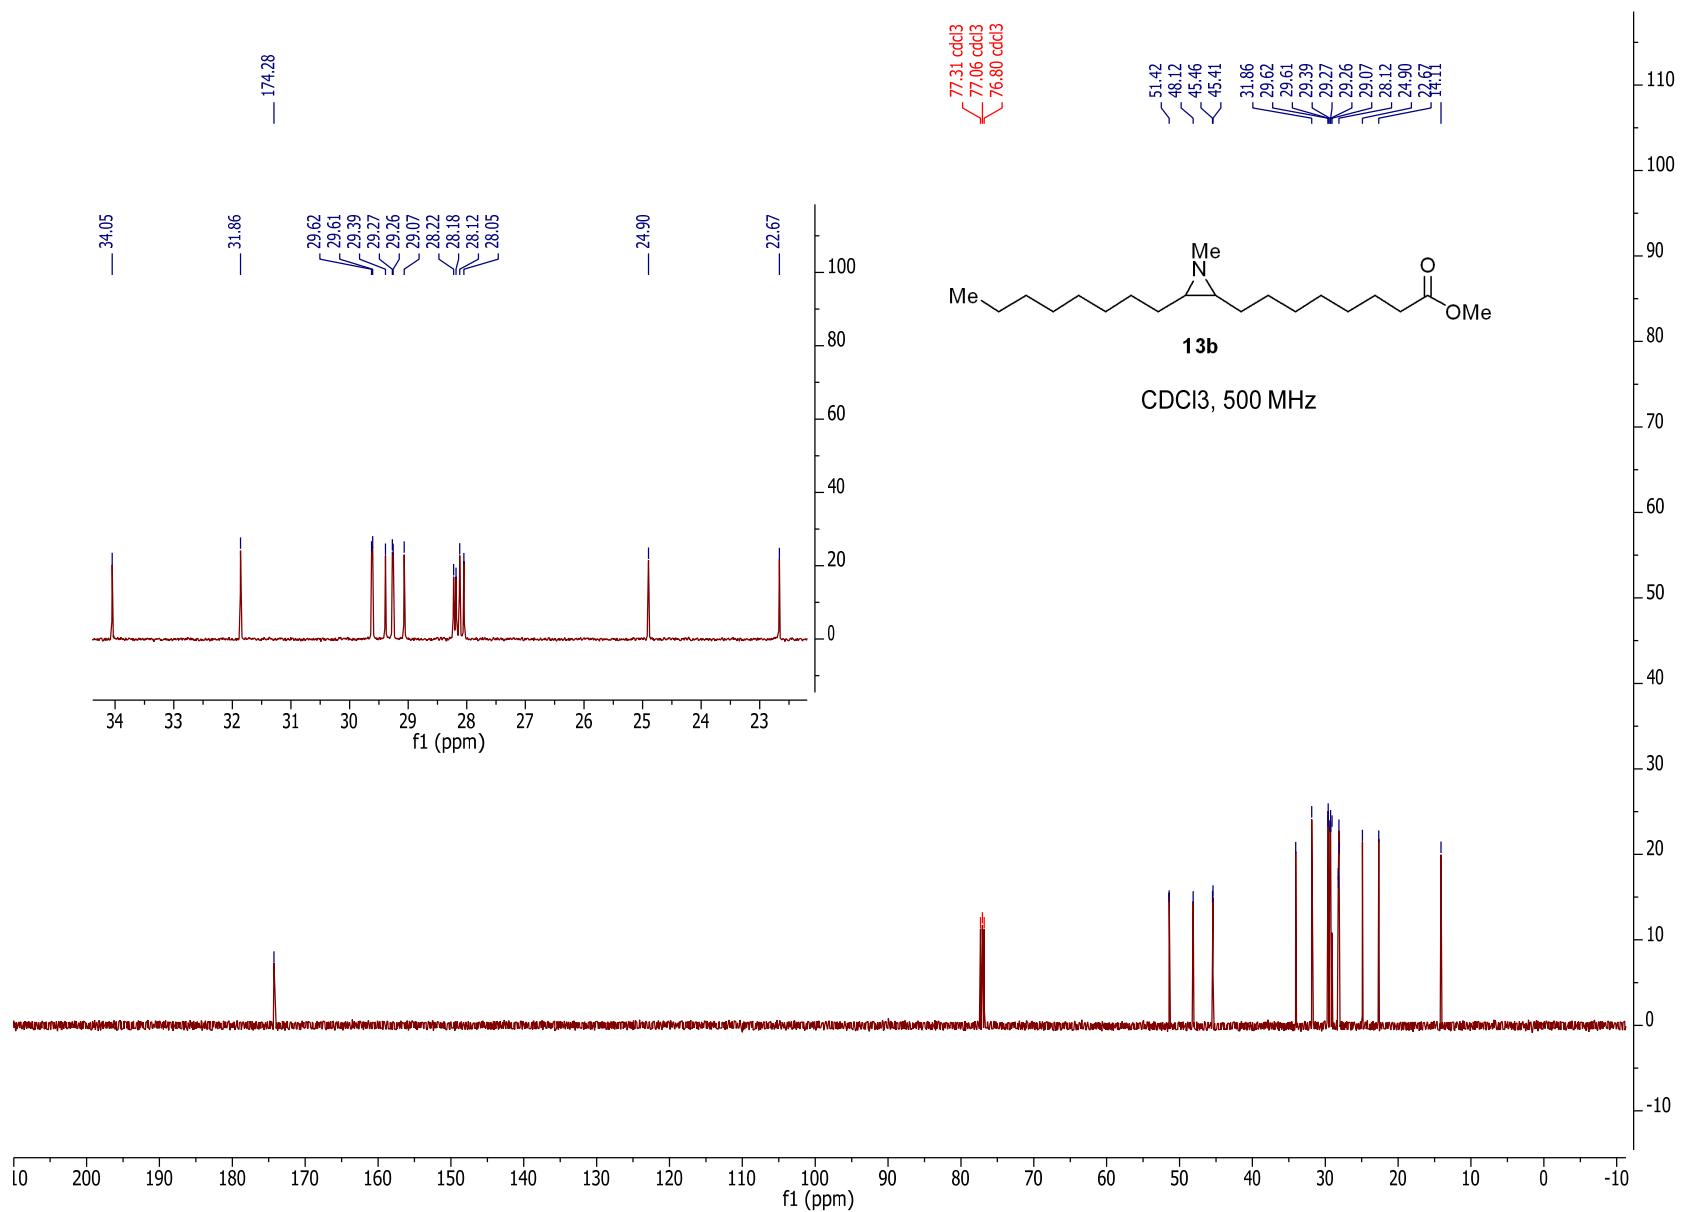

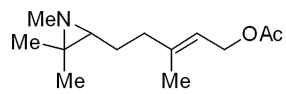

**13c - 6,7 isomer**

CDCl<sub>3</sub>, 500 MHz

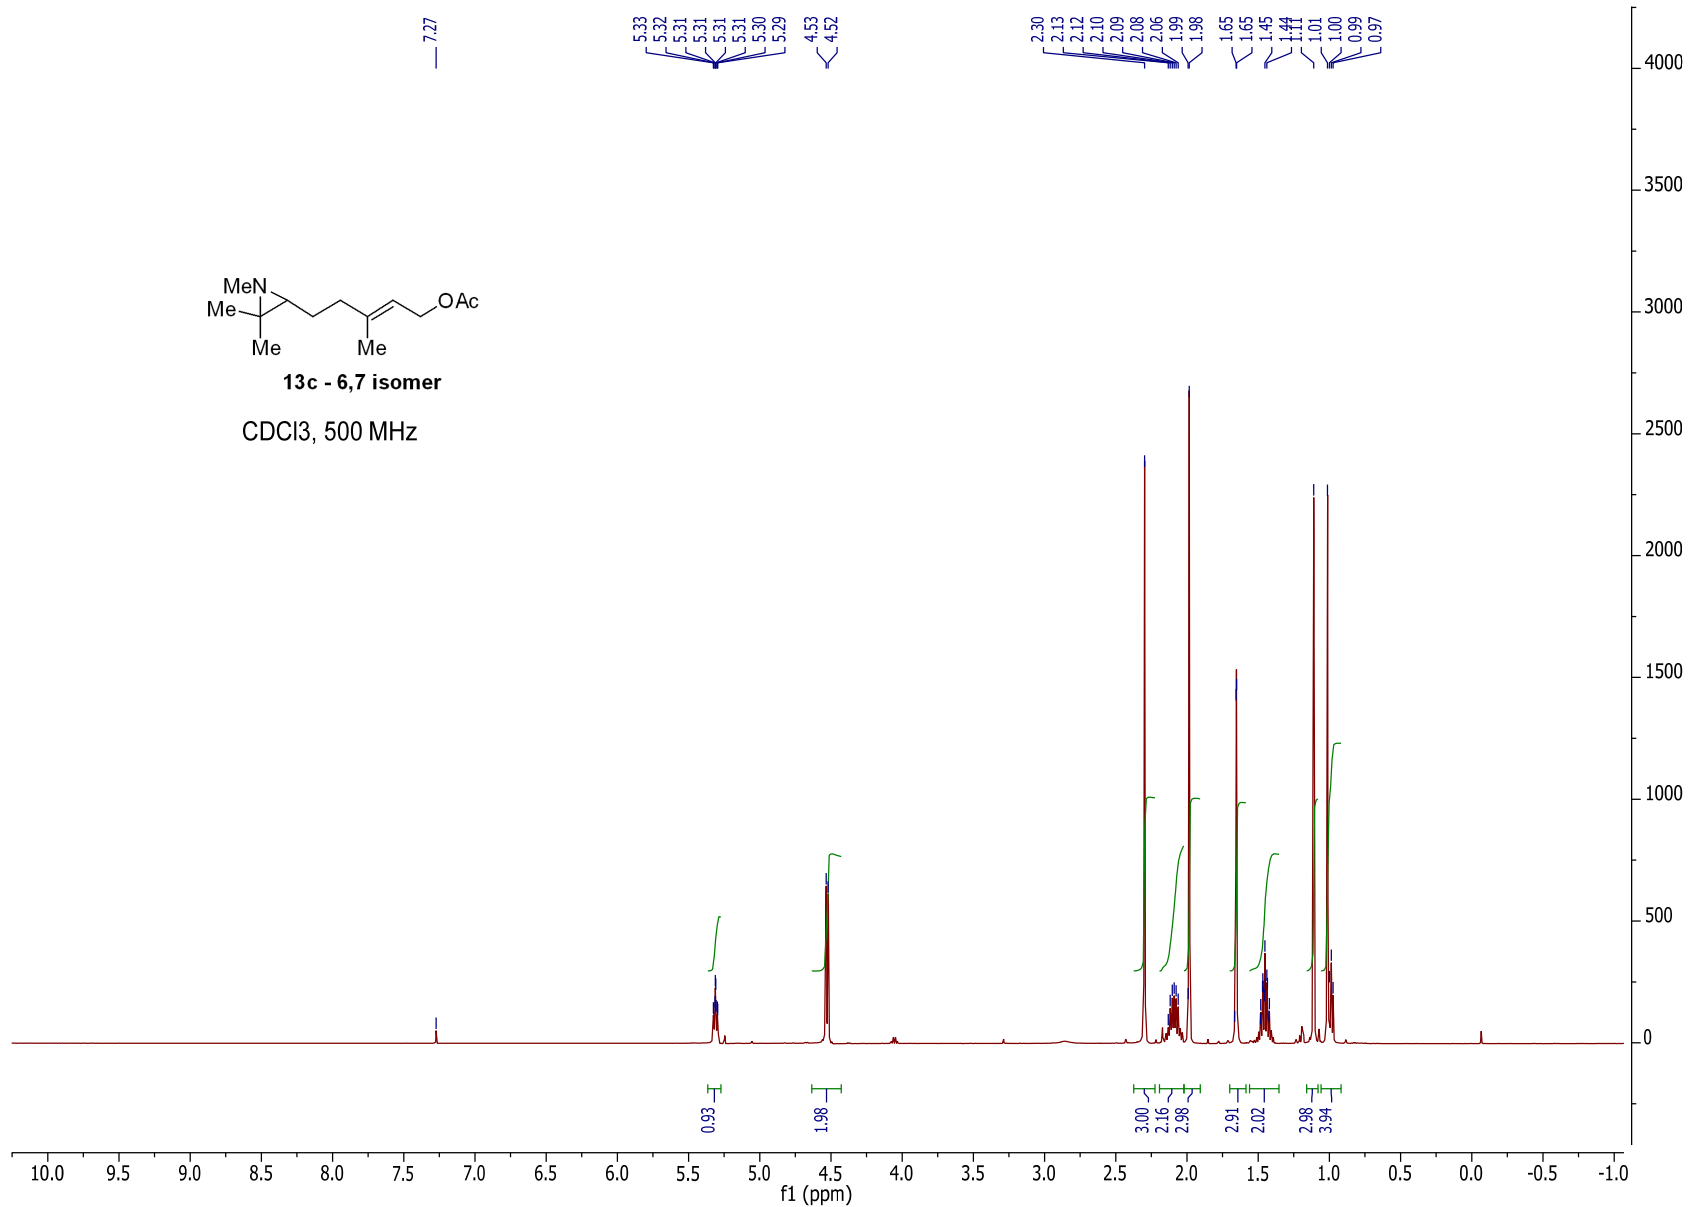

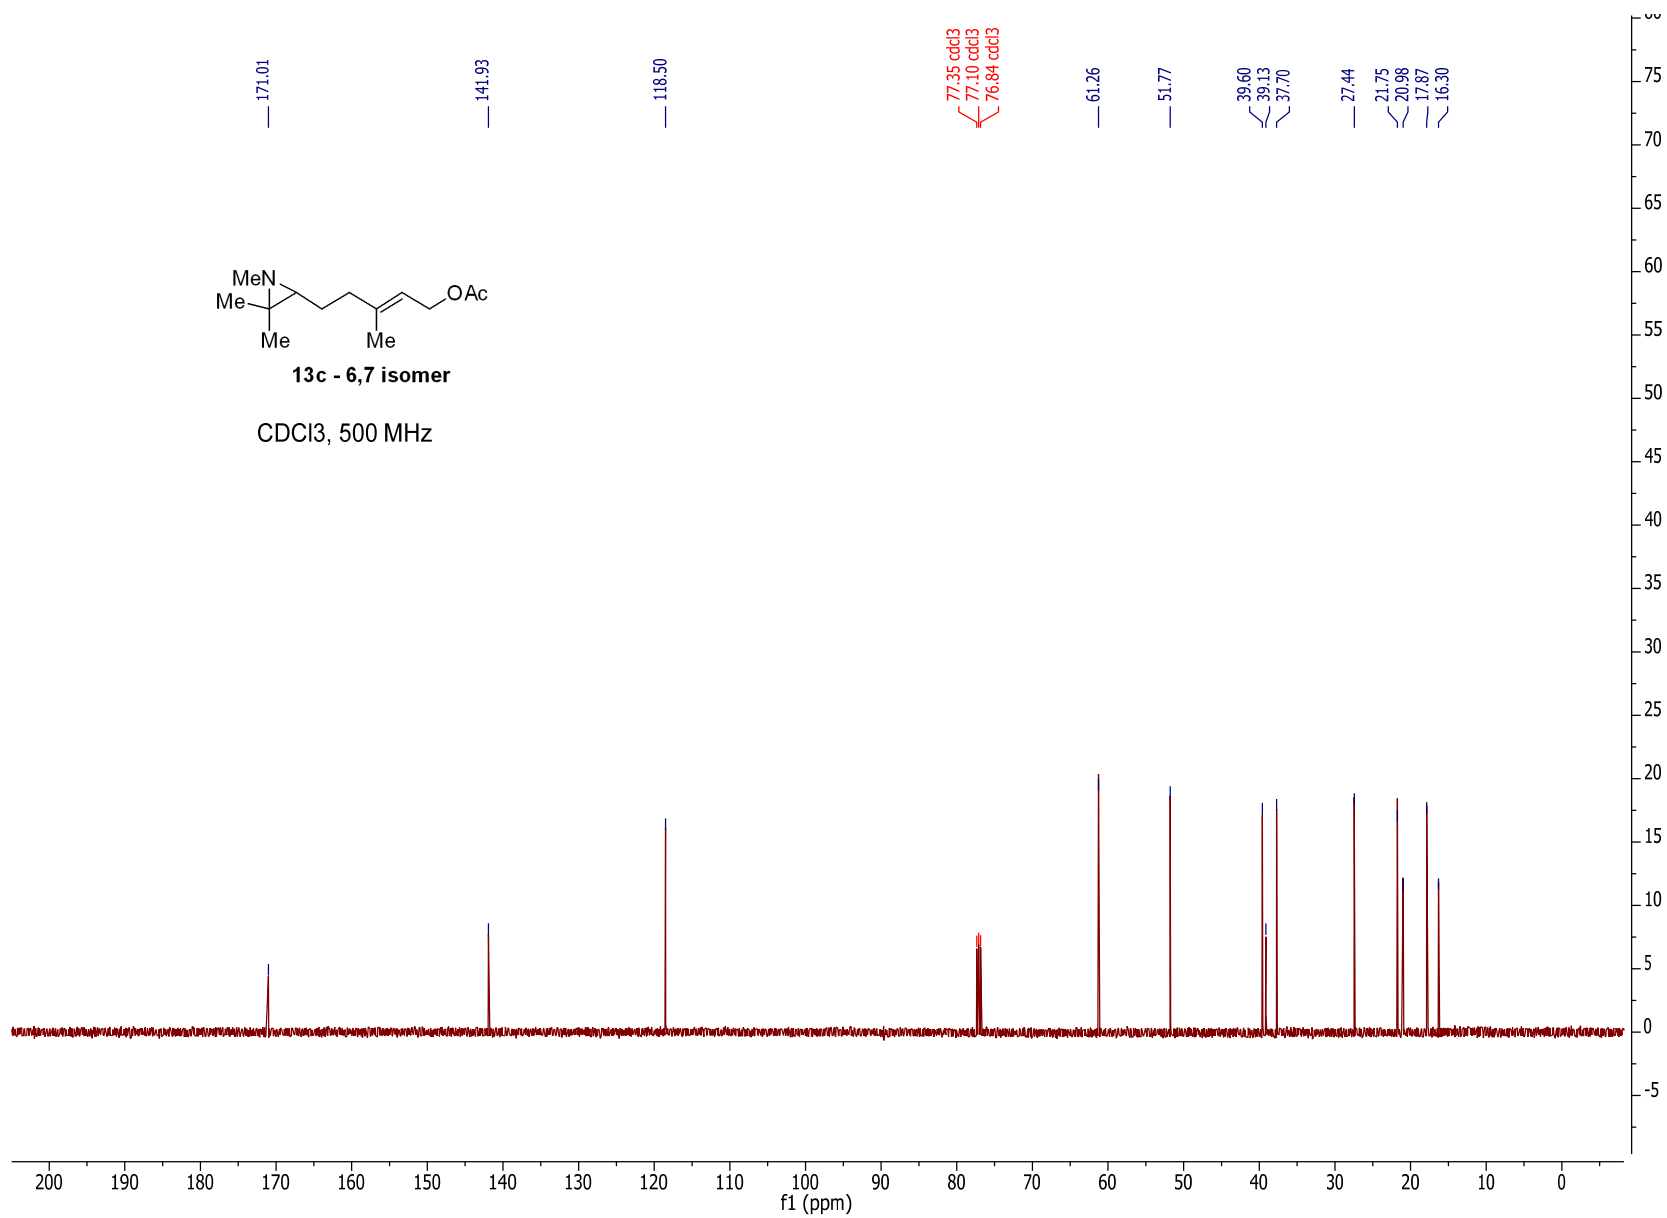

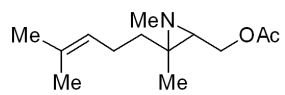

**13c - 2,3 isomer**

CDCl<sub>3</sub>, 400 MHz

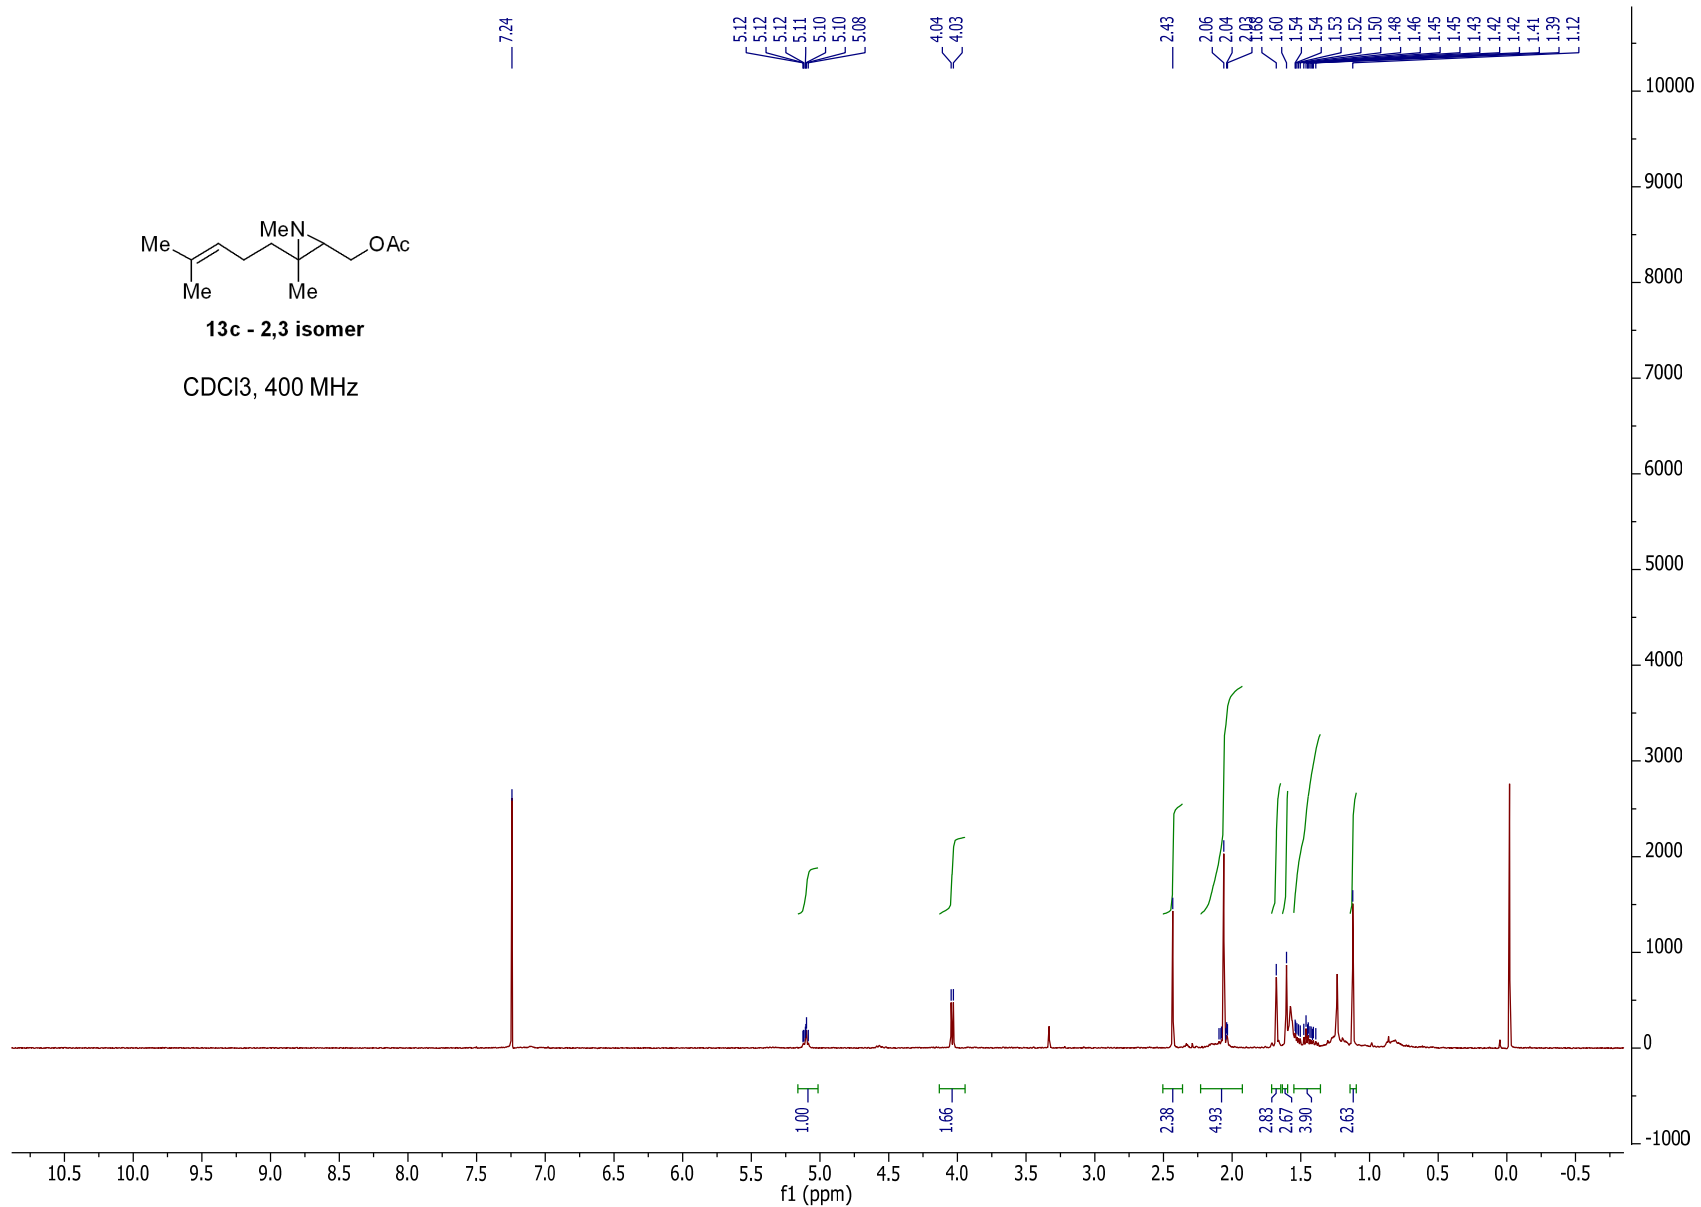



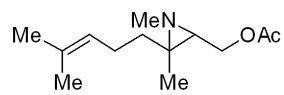

**13c - 2,3 isomer**

CDCl<sub>3</sub>, 400 MHz

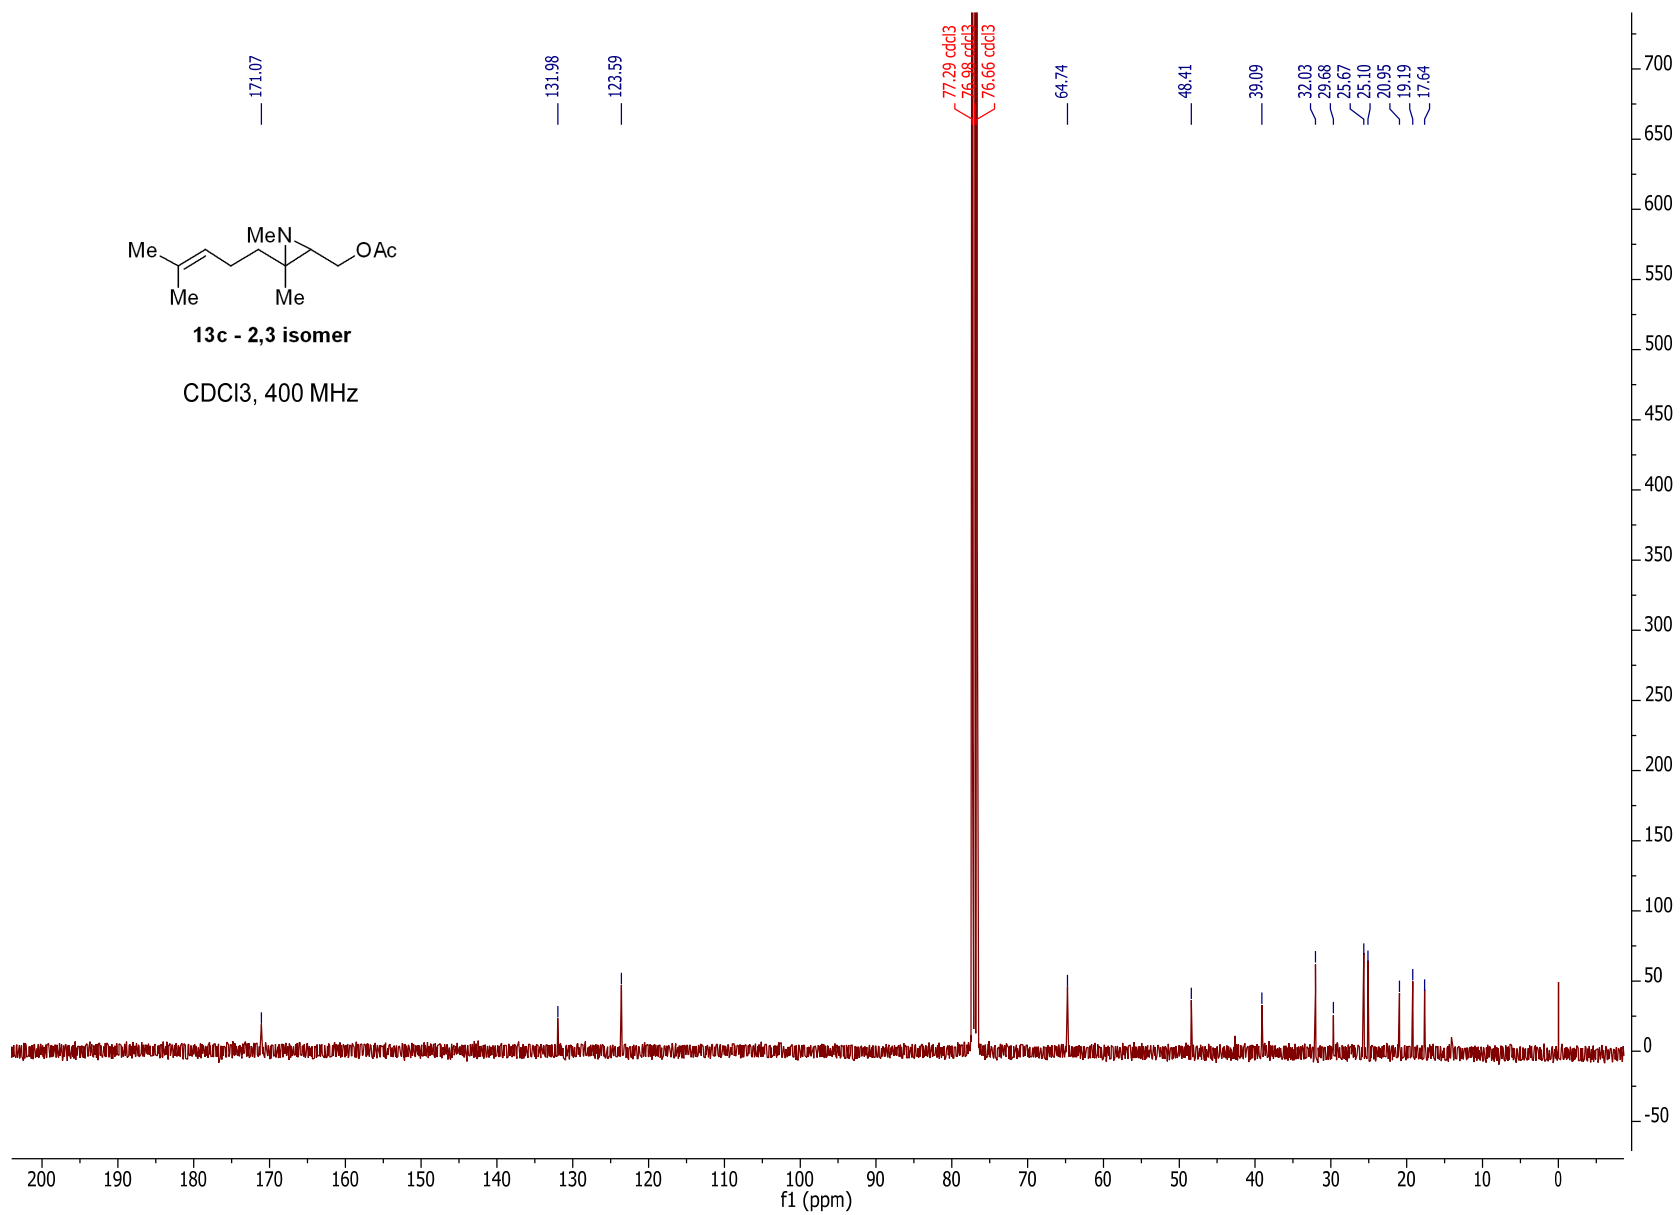

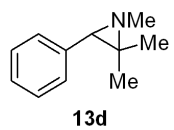

CDCl<sub>3</sub>, 500 MHz

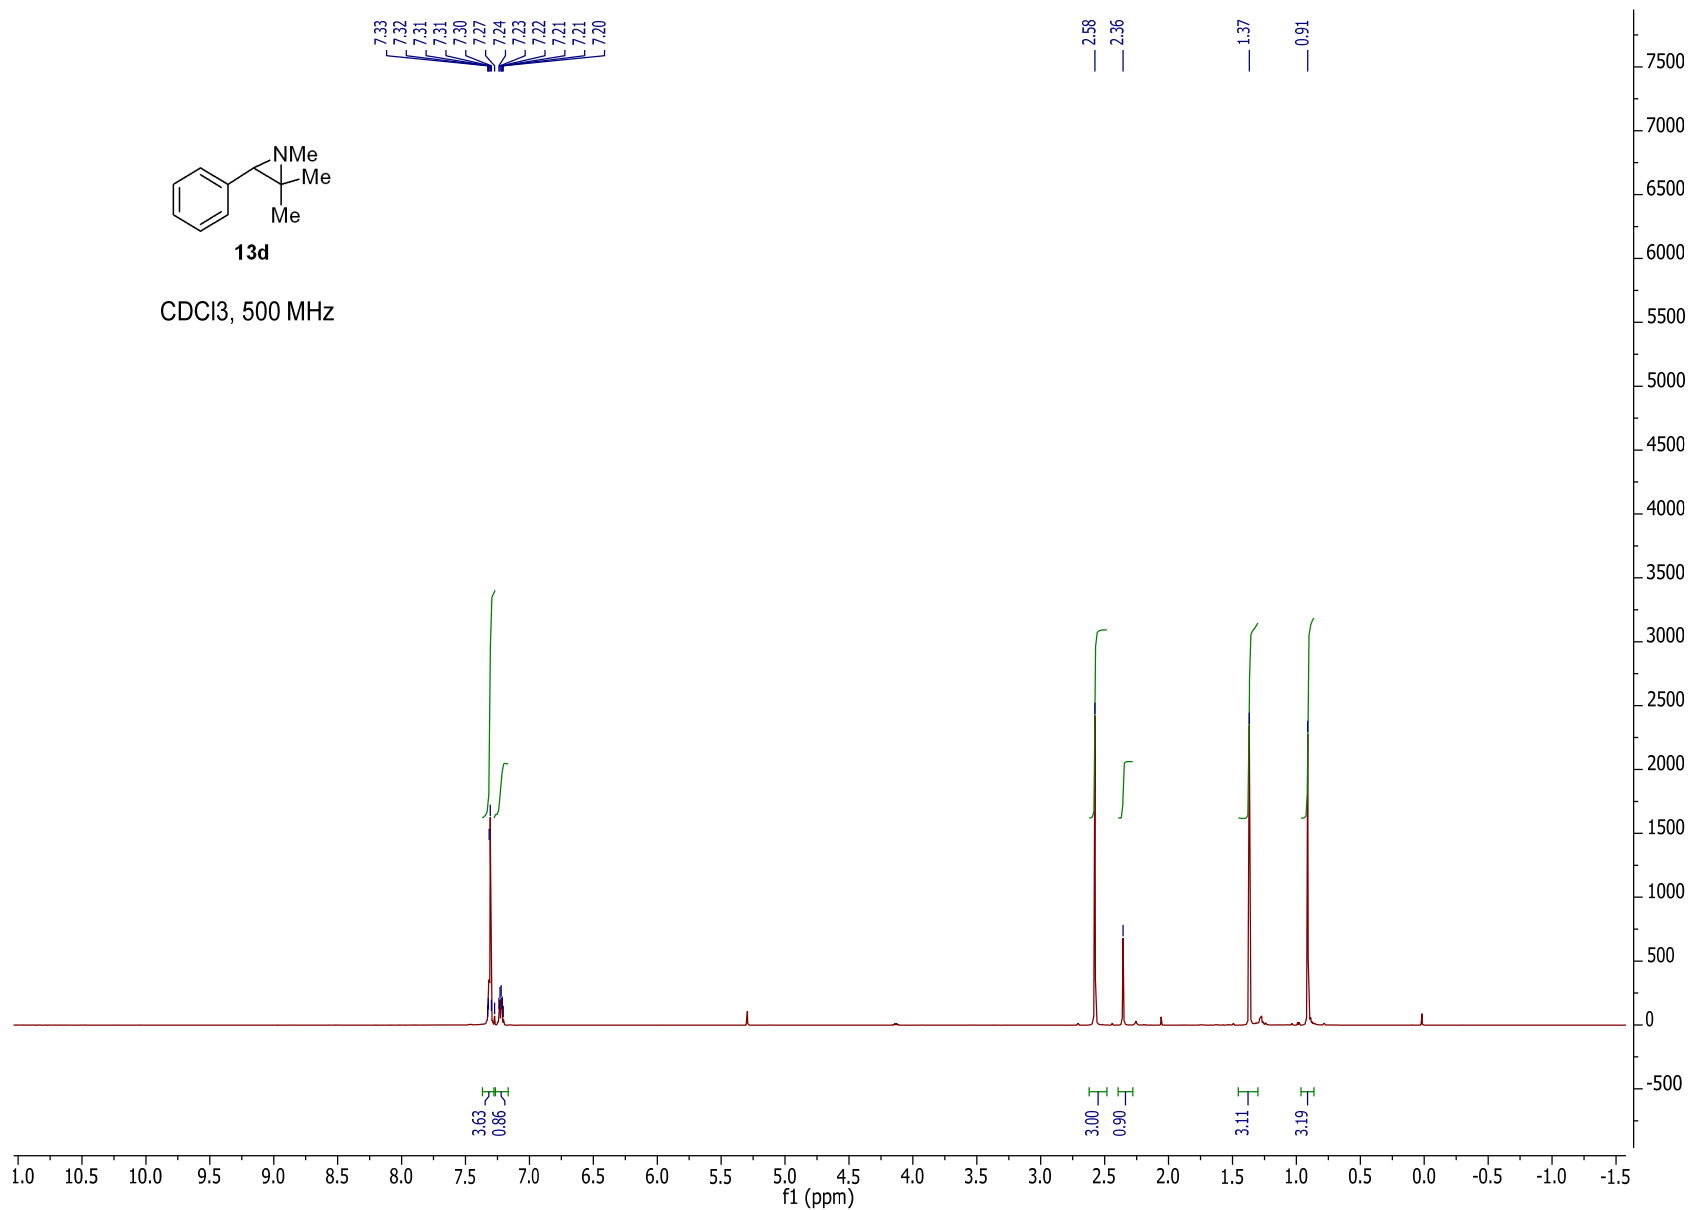

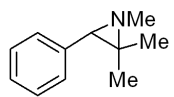

**13d**

CDCl<sub>3</sub>, 500 MHz

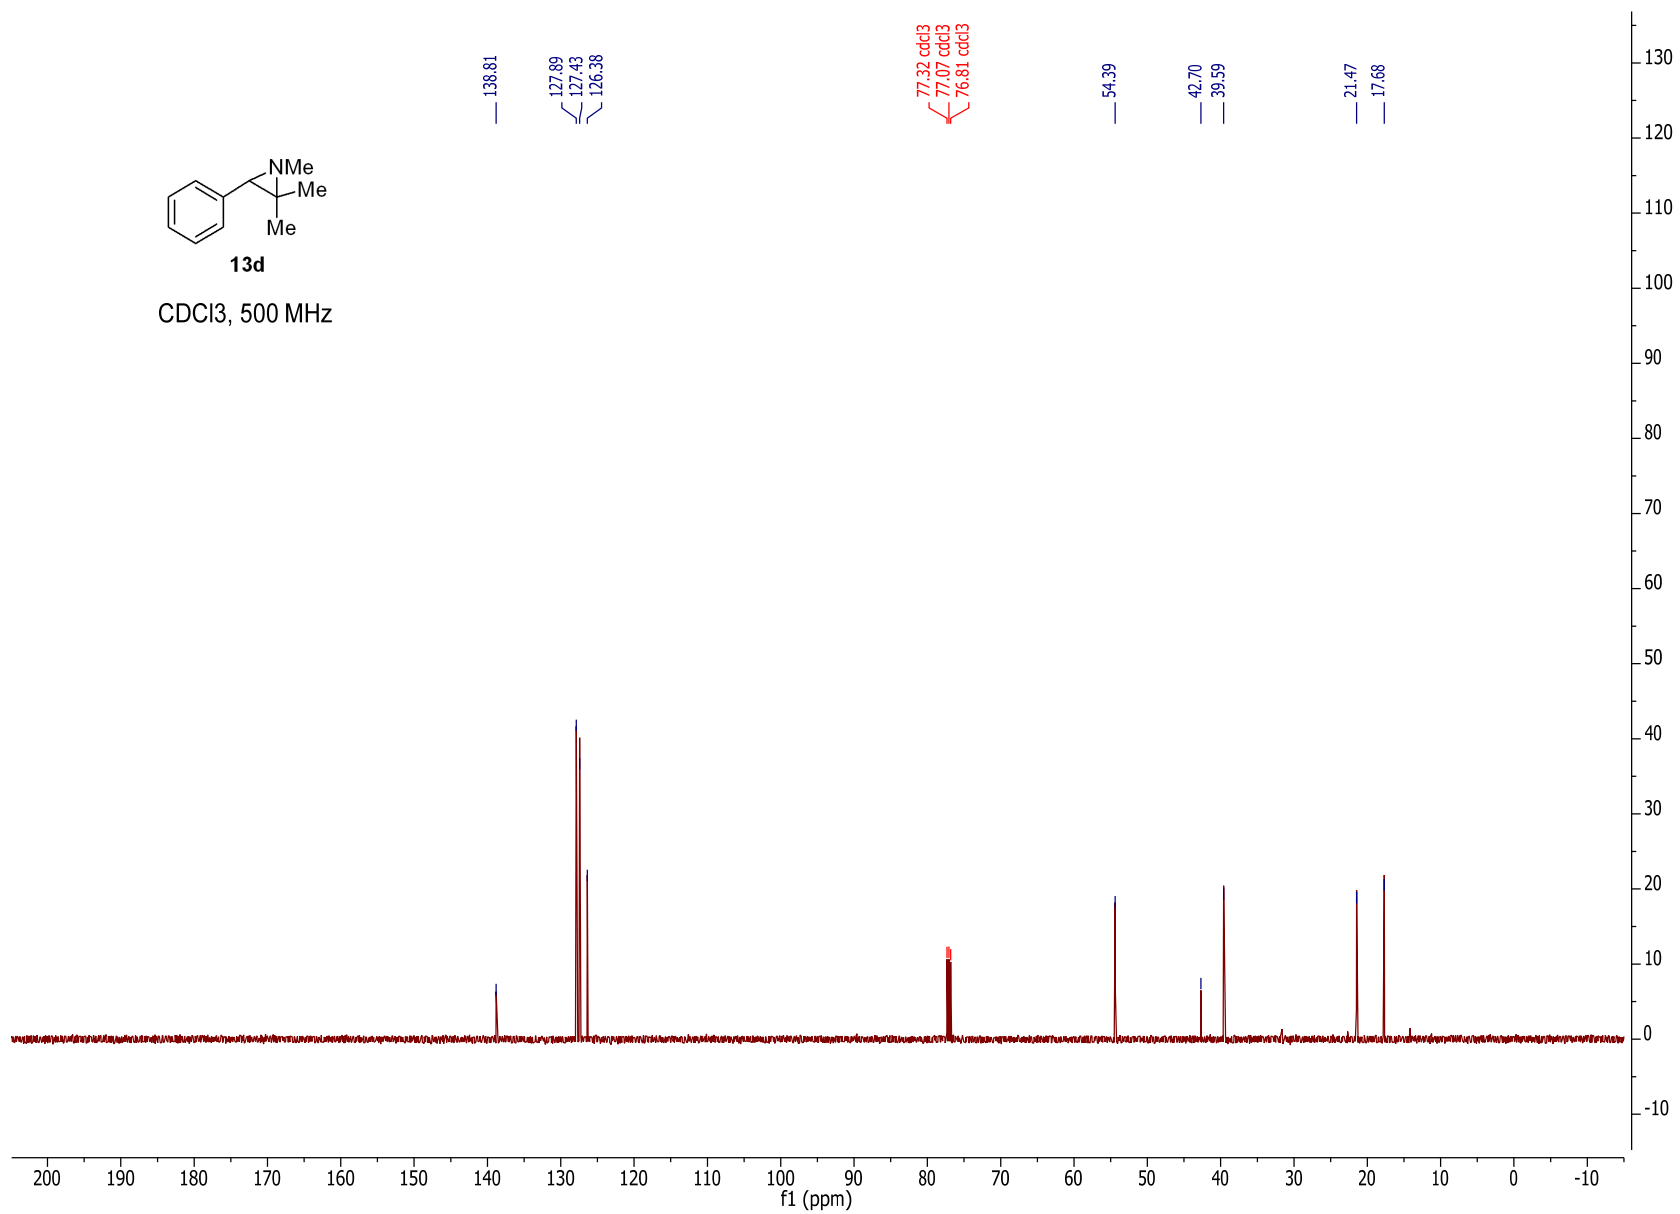

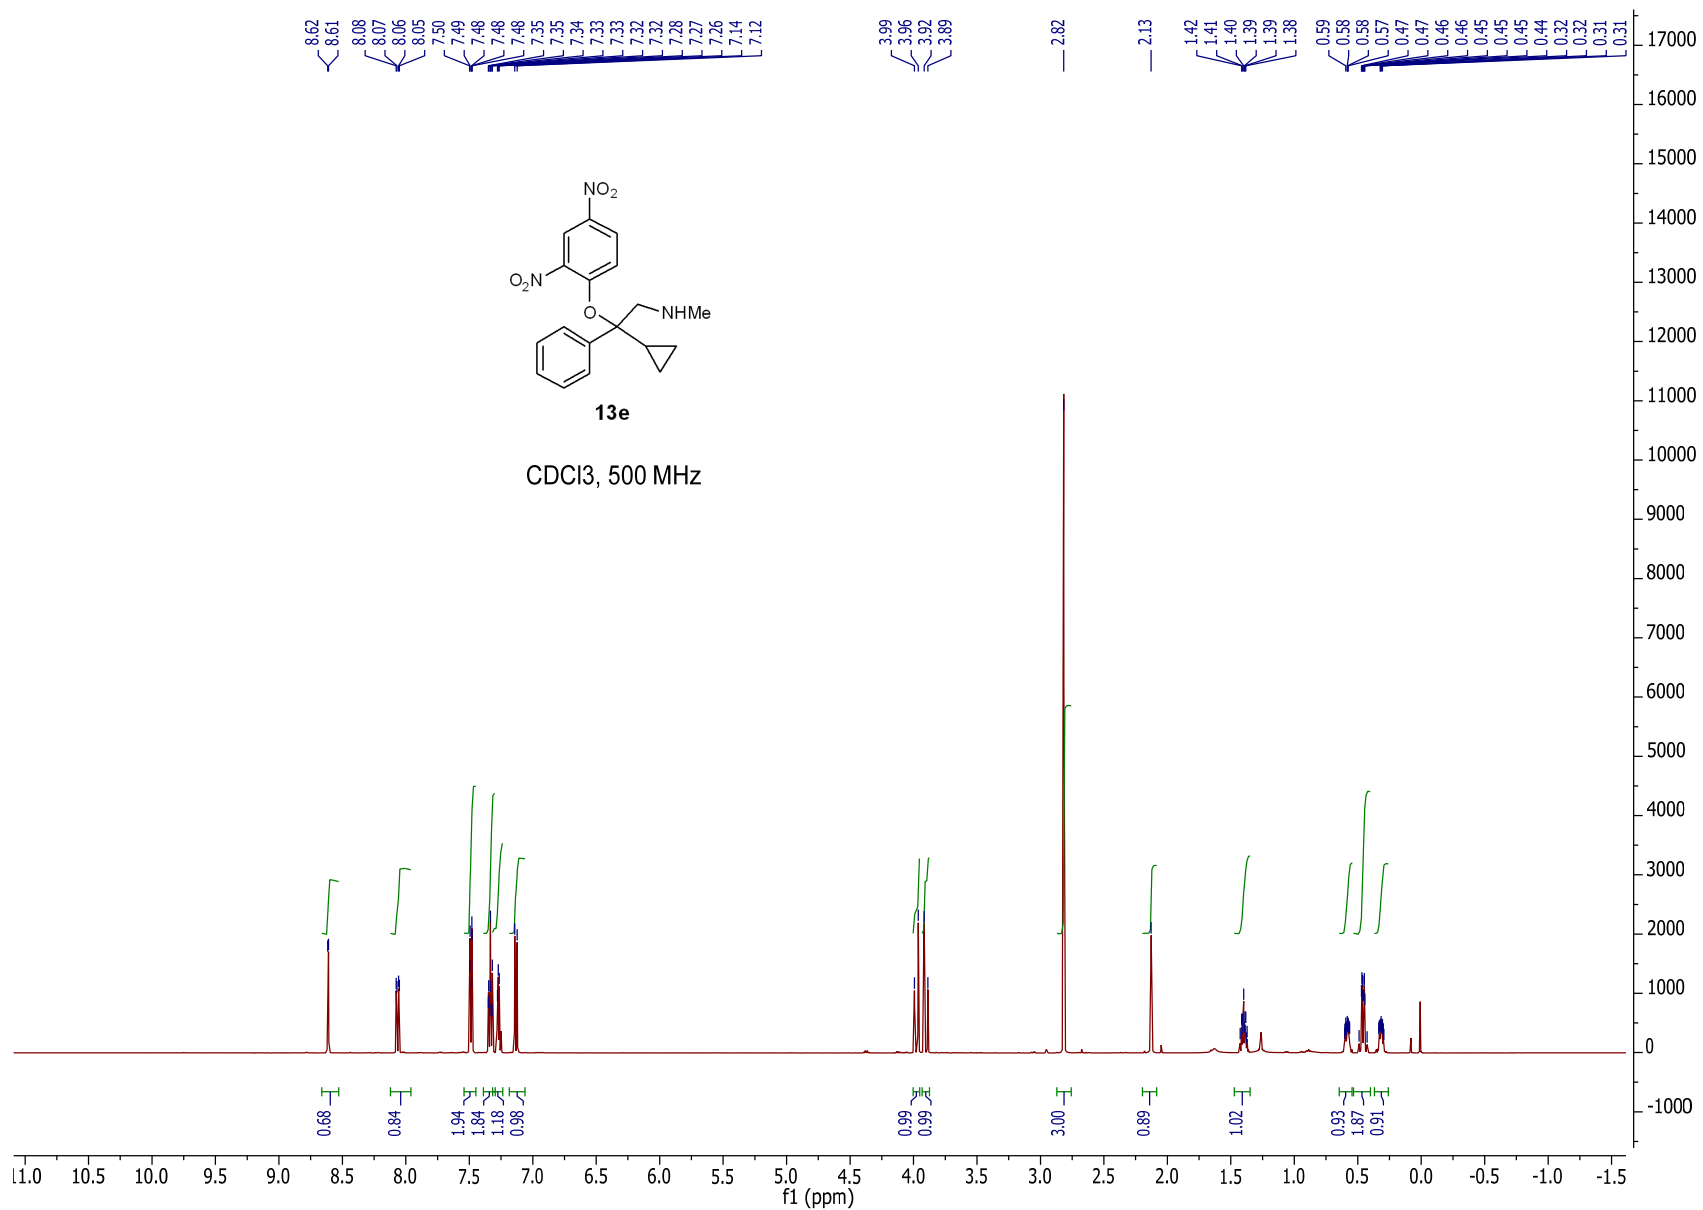

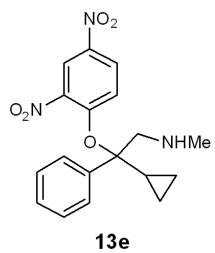

CDCl<sub>3</sub>, 500 MHz

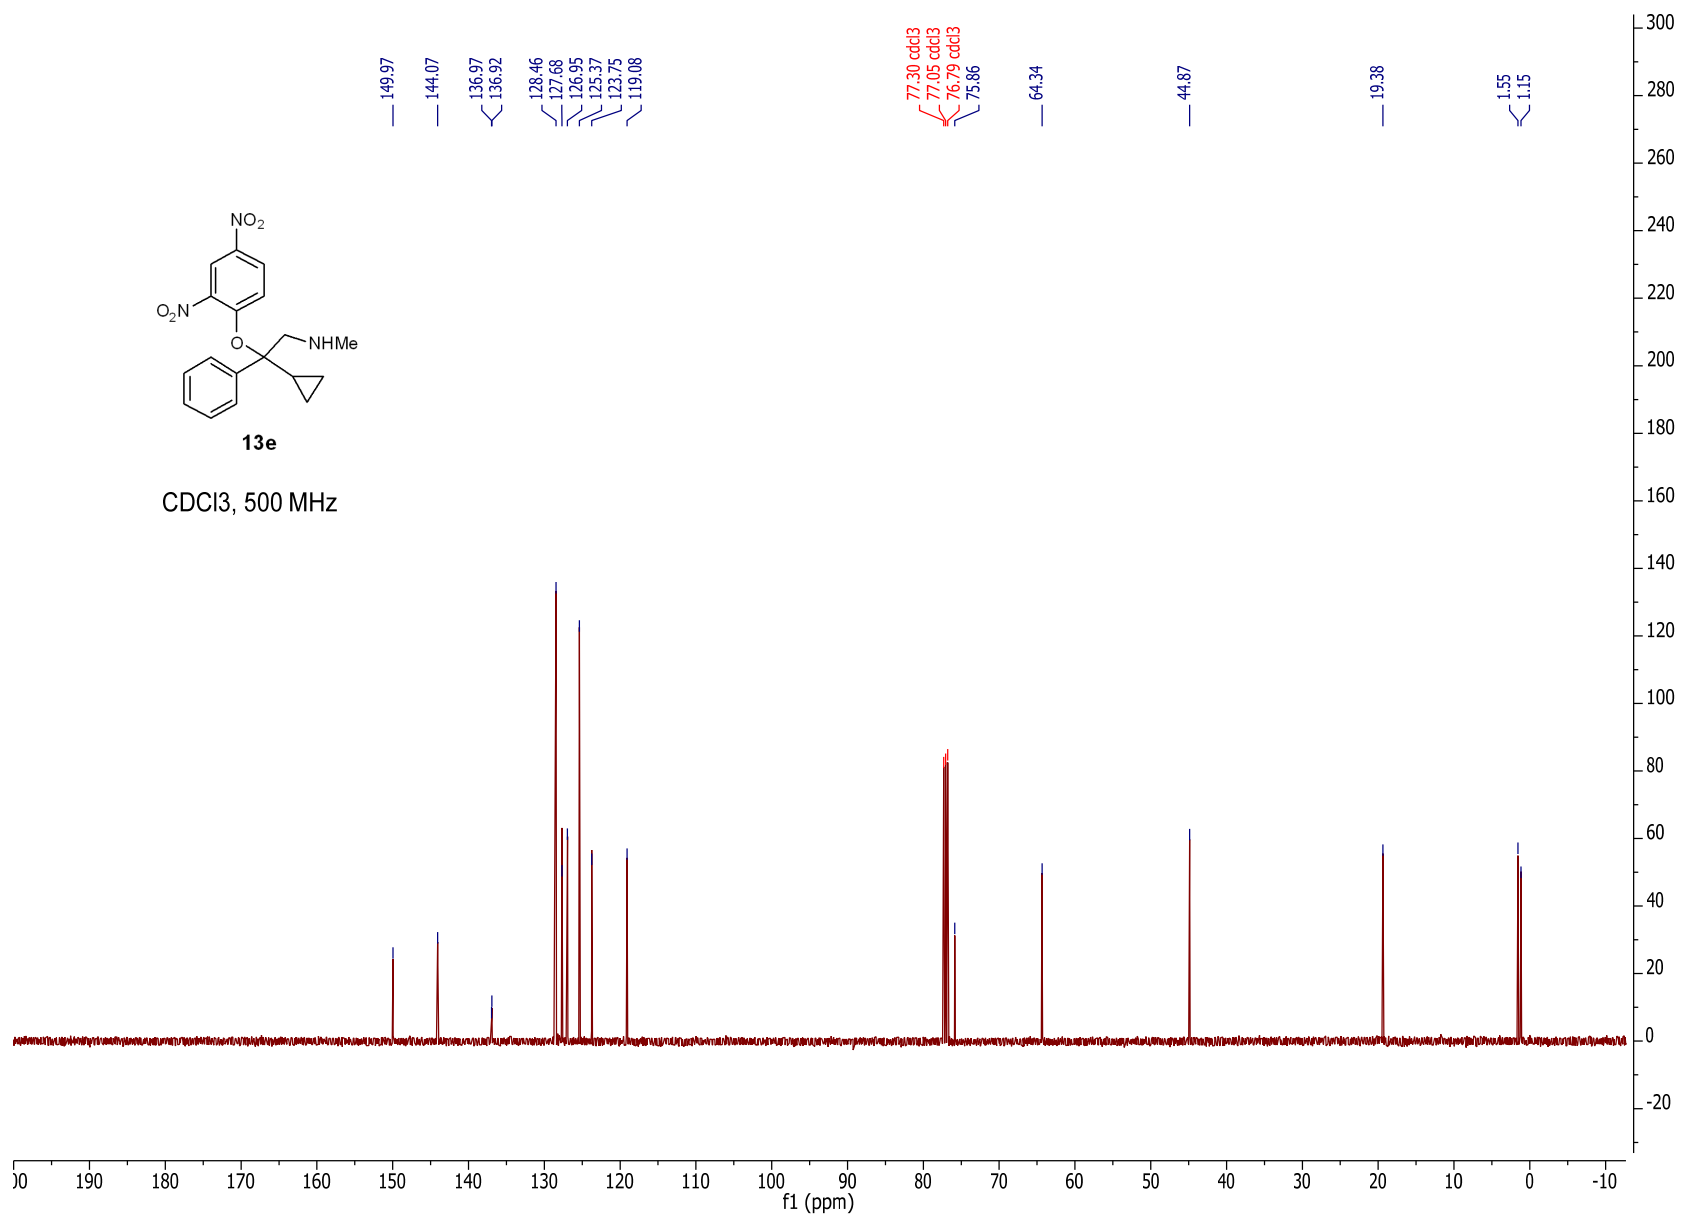

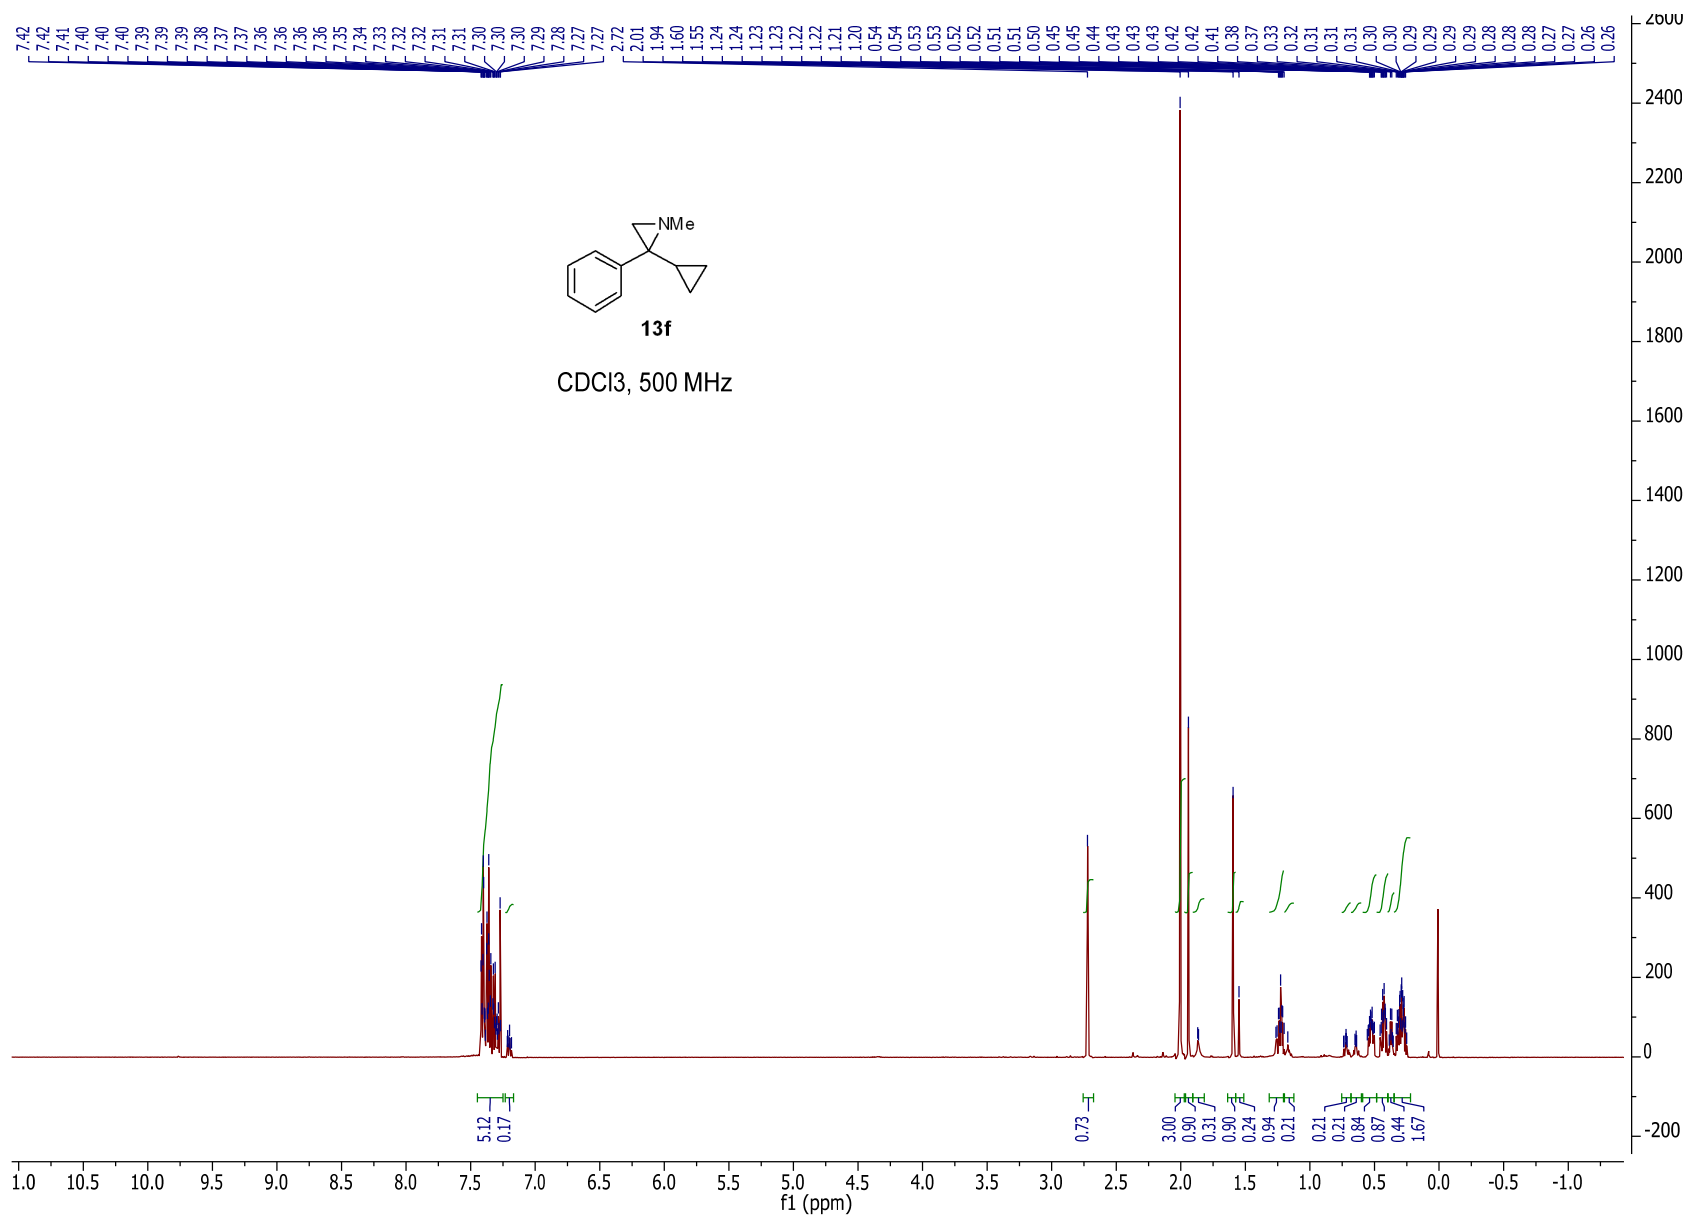

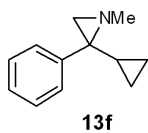

CDCl<sub>3</sub>, 500 MHz

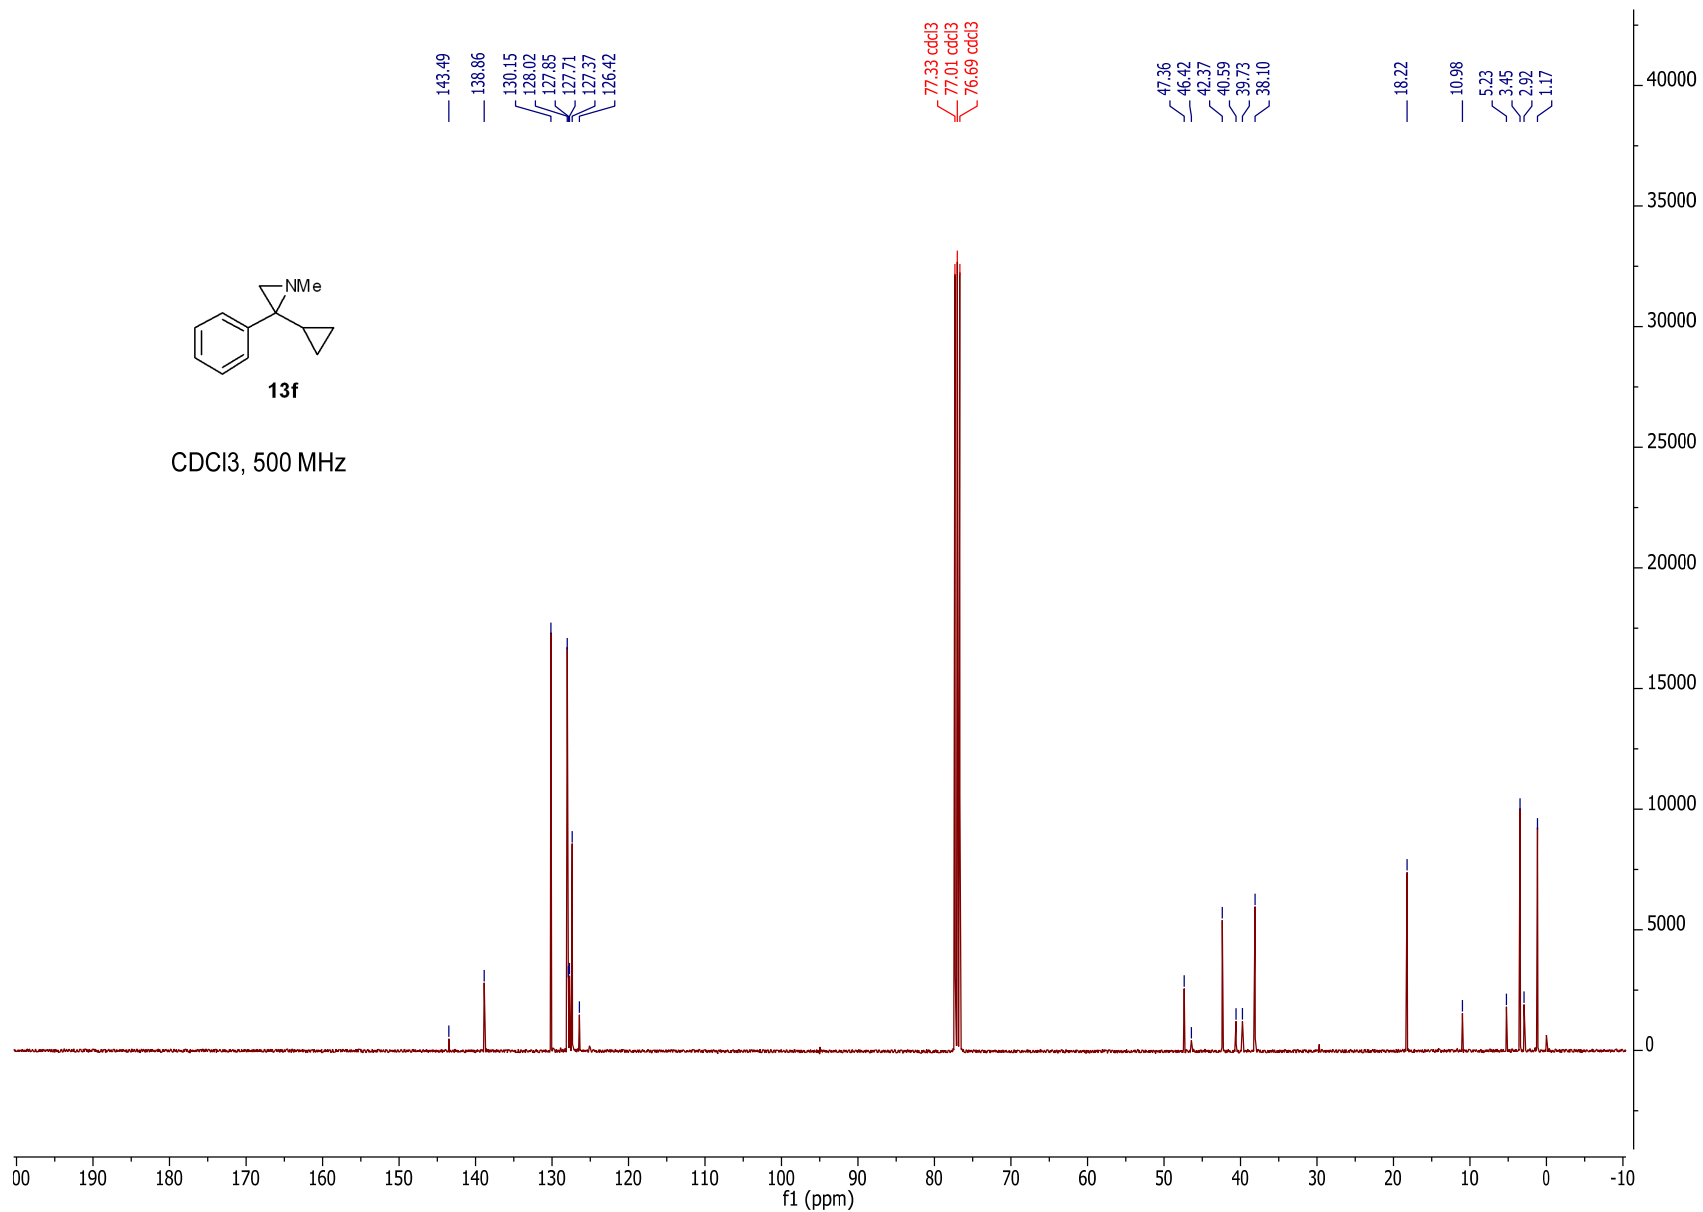

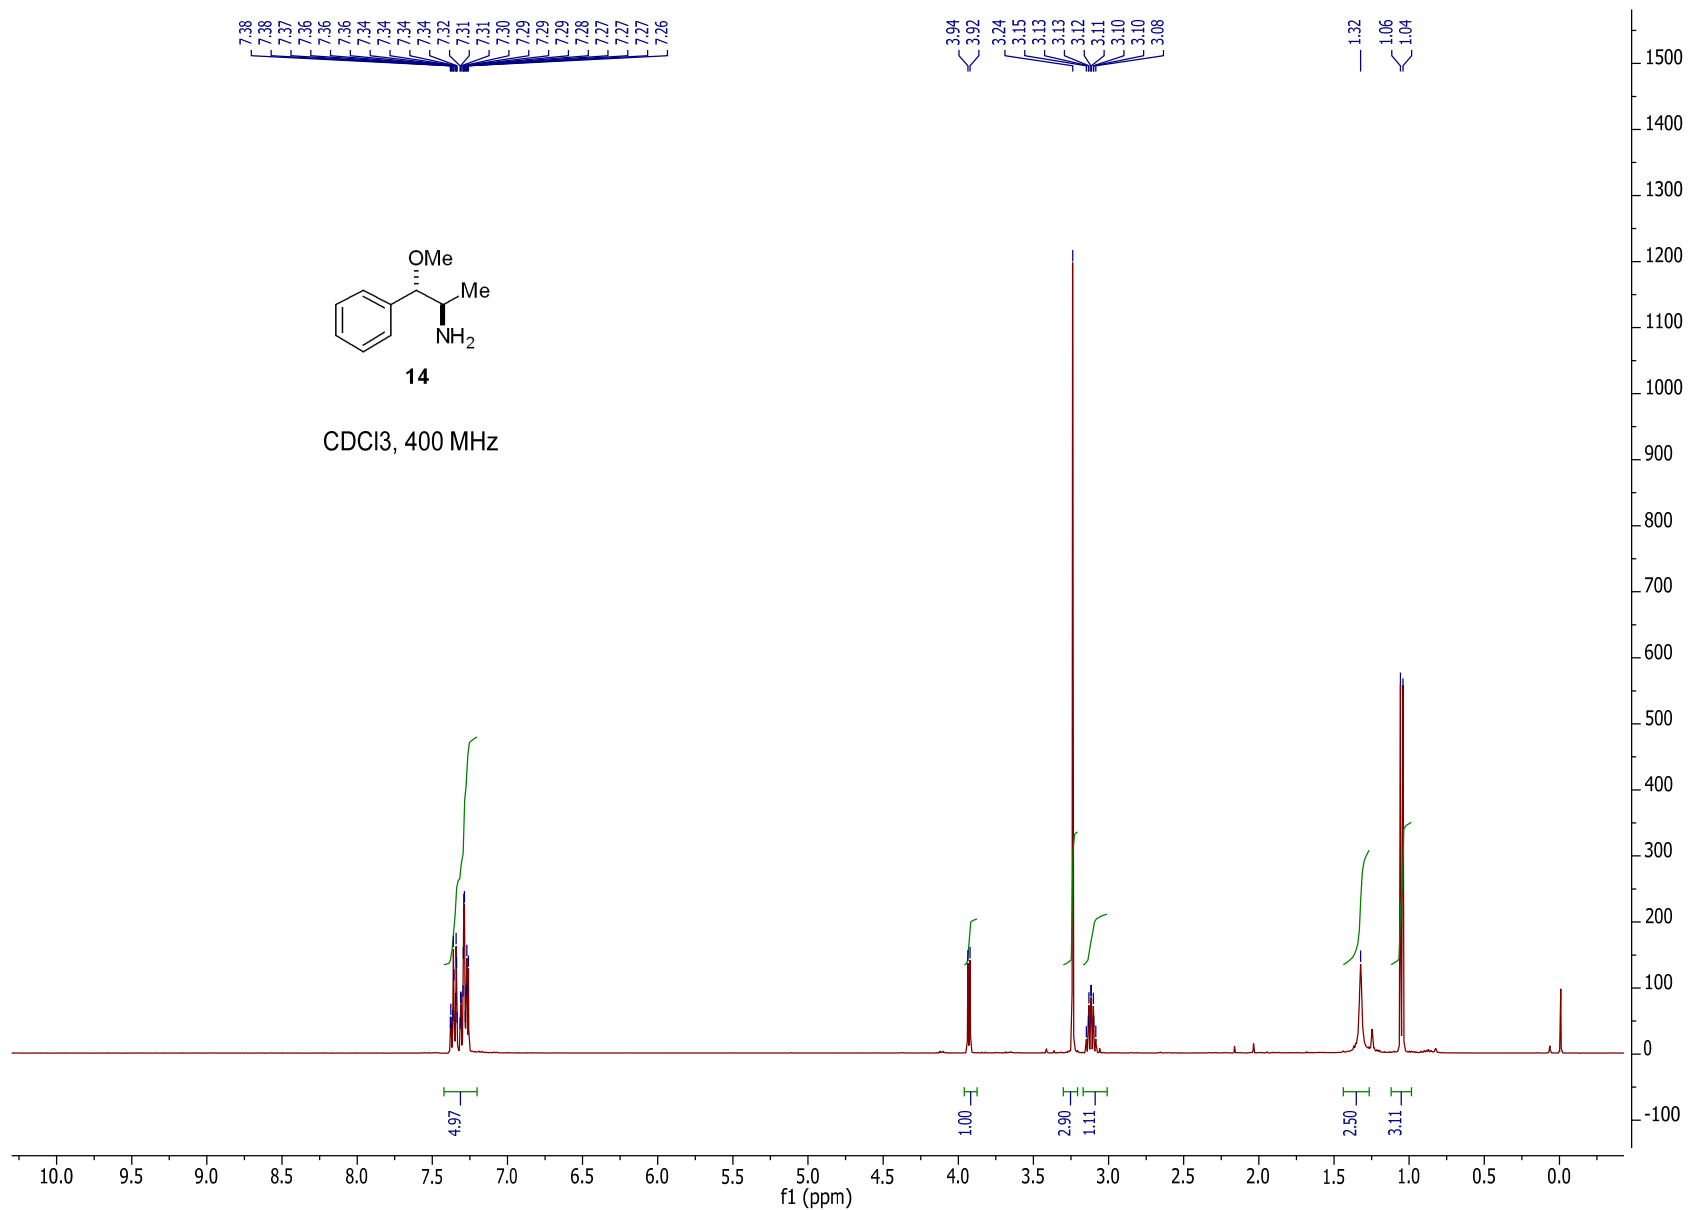

SI-200



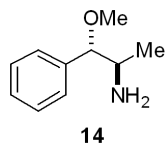

CDCl<sub>3</sub>, 400 MHz

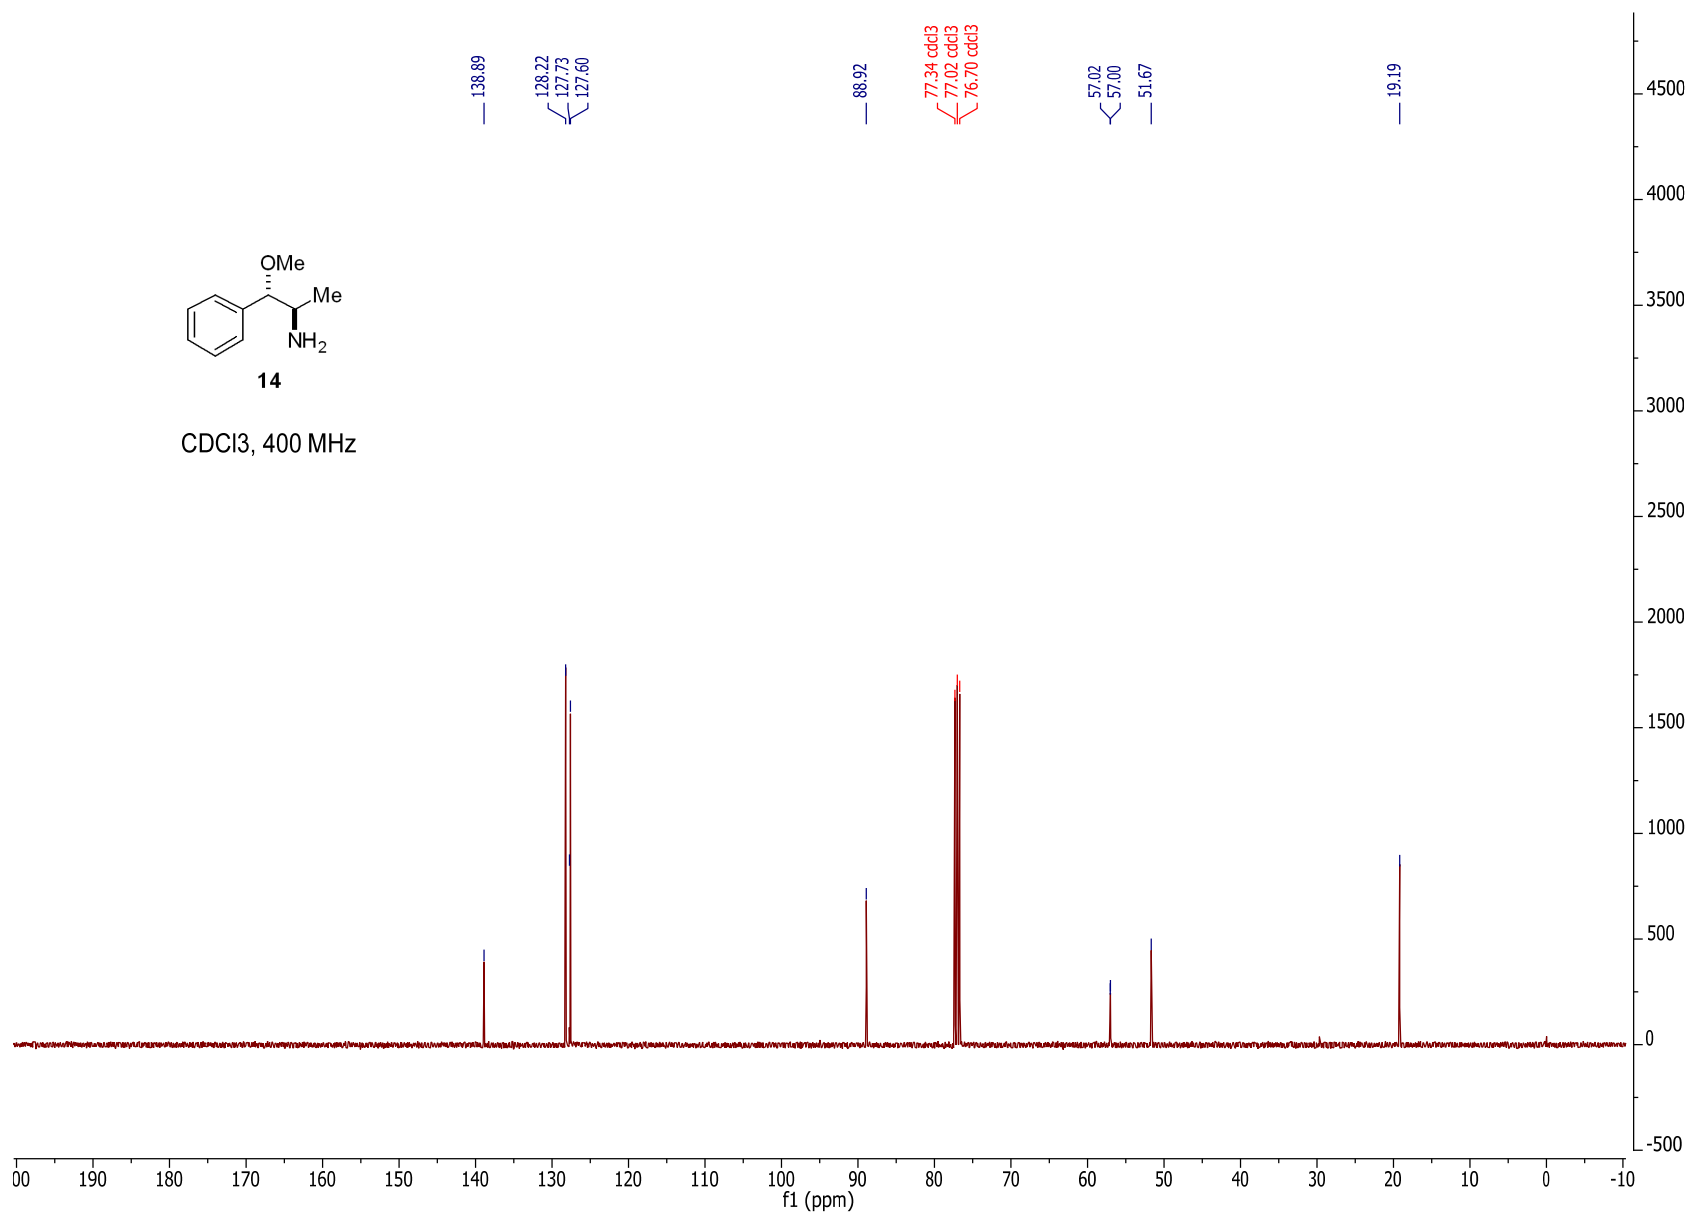

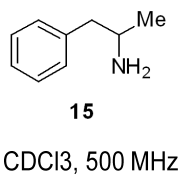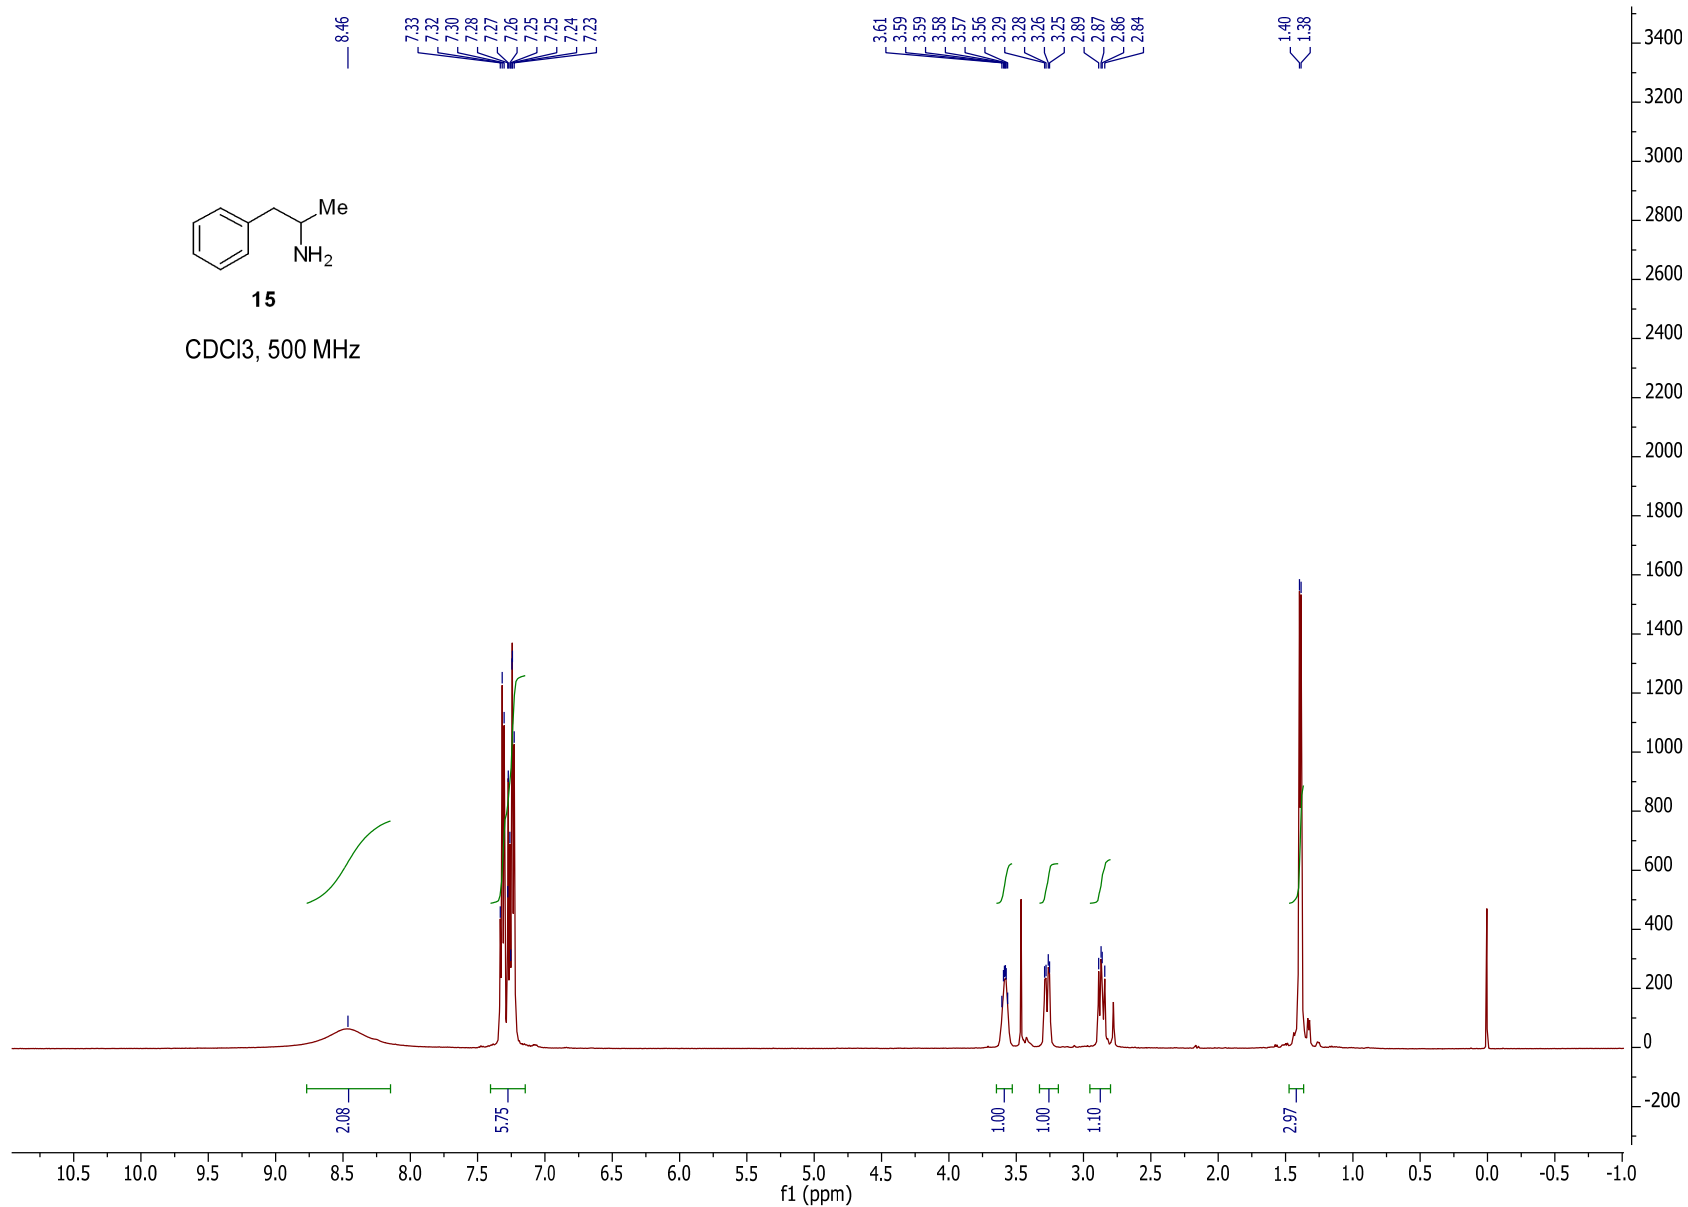

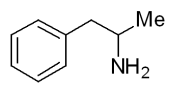

**15**

CDCl<sub>3</sub>, 500 MHz

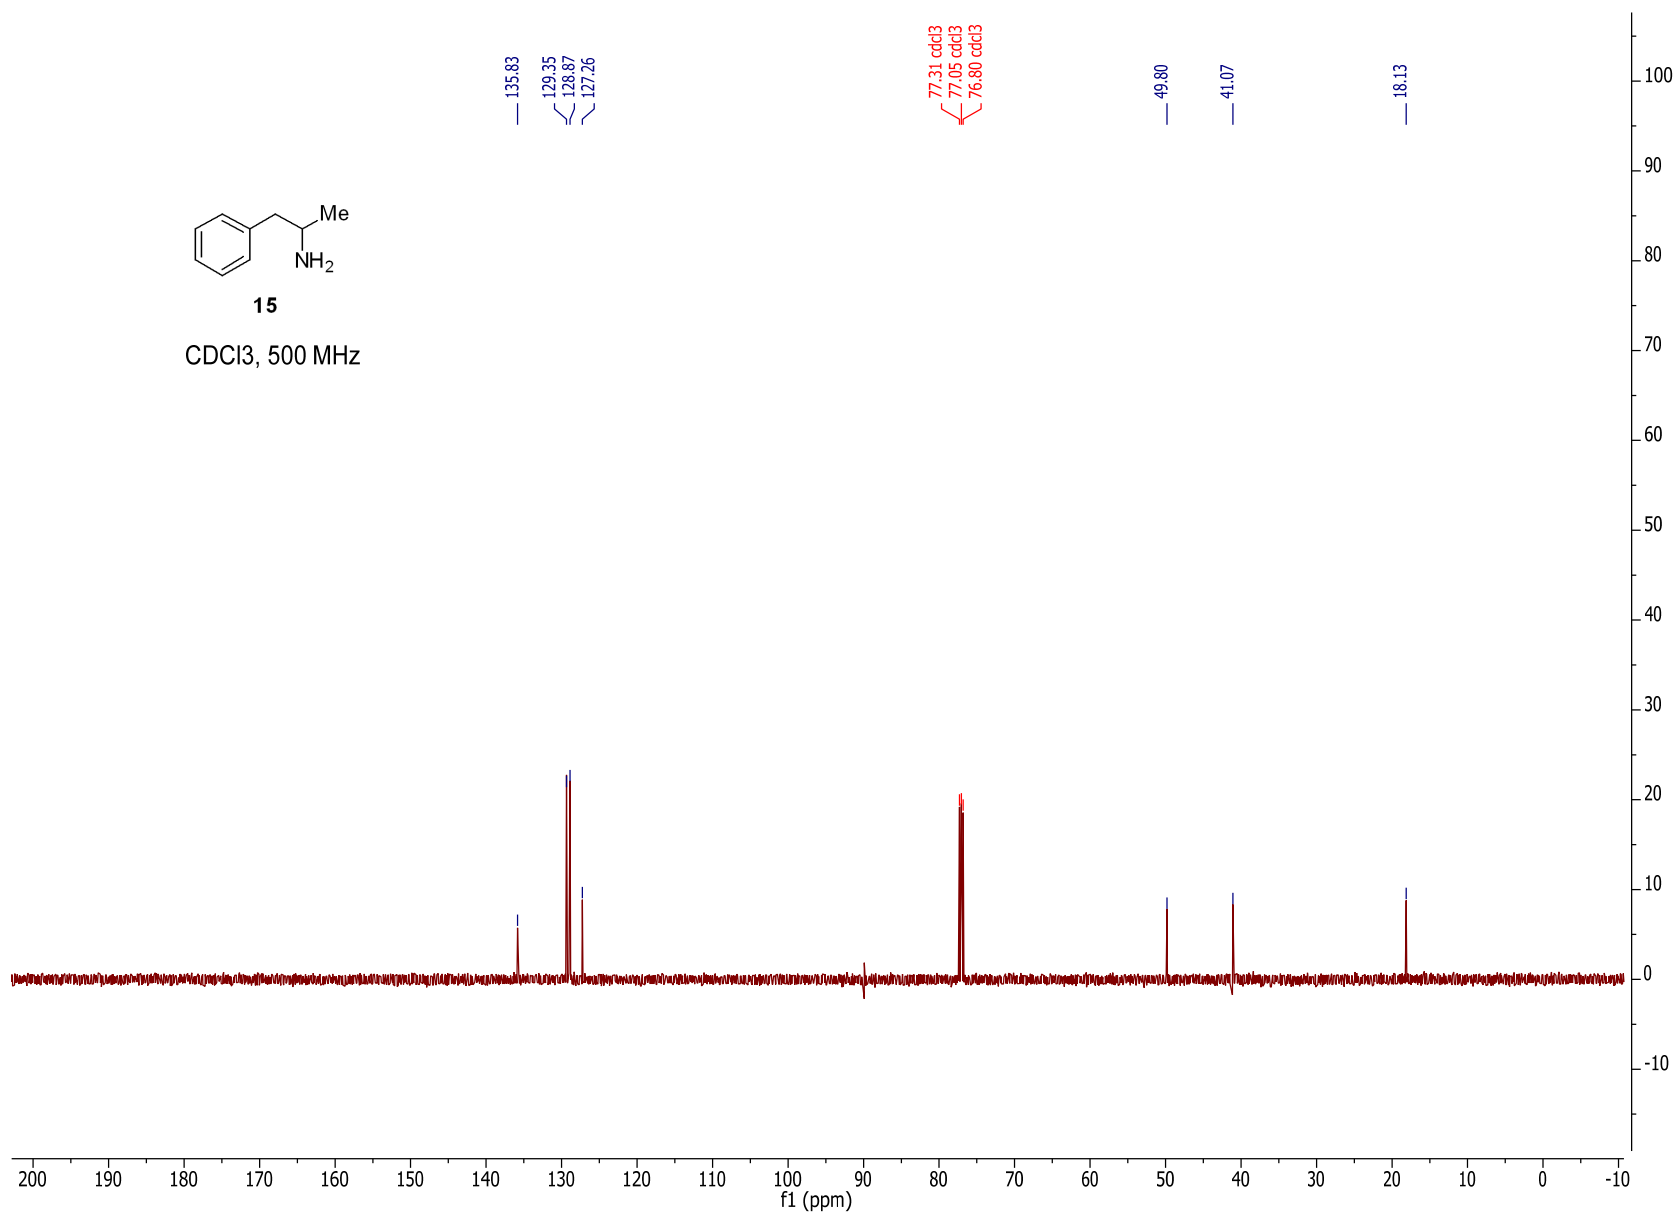

SI-203

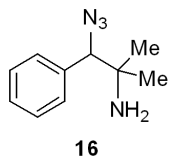

CDCl<sub>3</sub>, 500 MHz

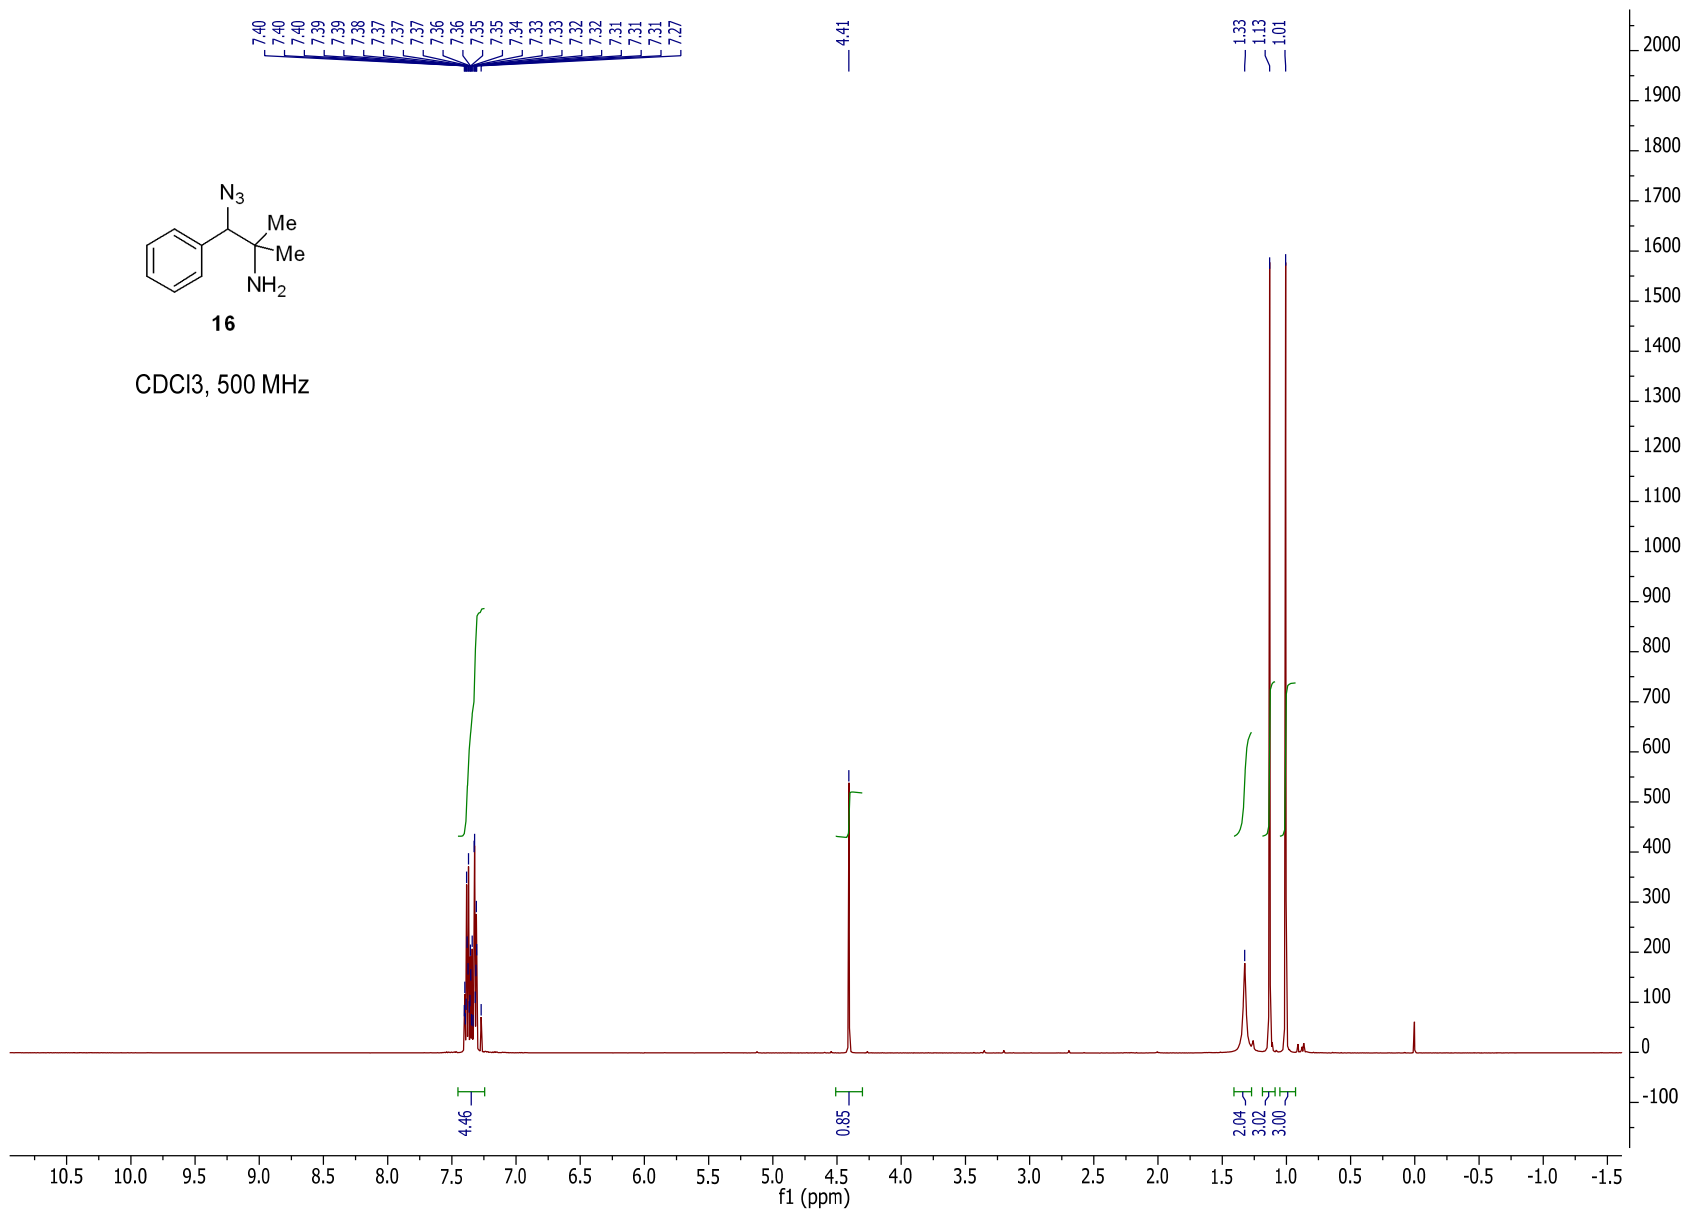

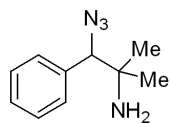

**16**

CDCl<sub>3</sub>, 500 MHz

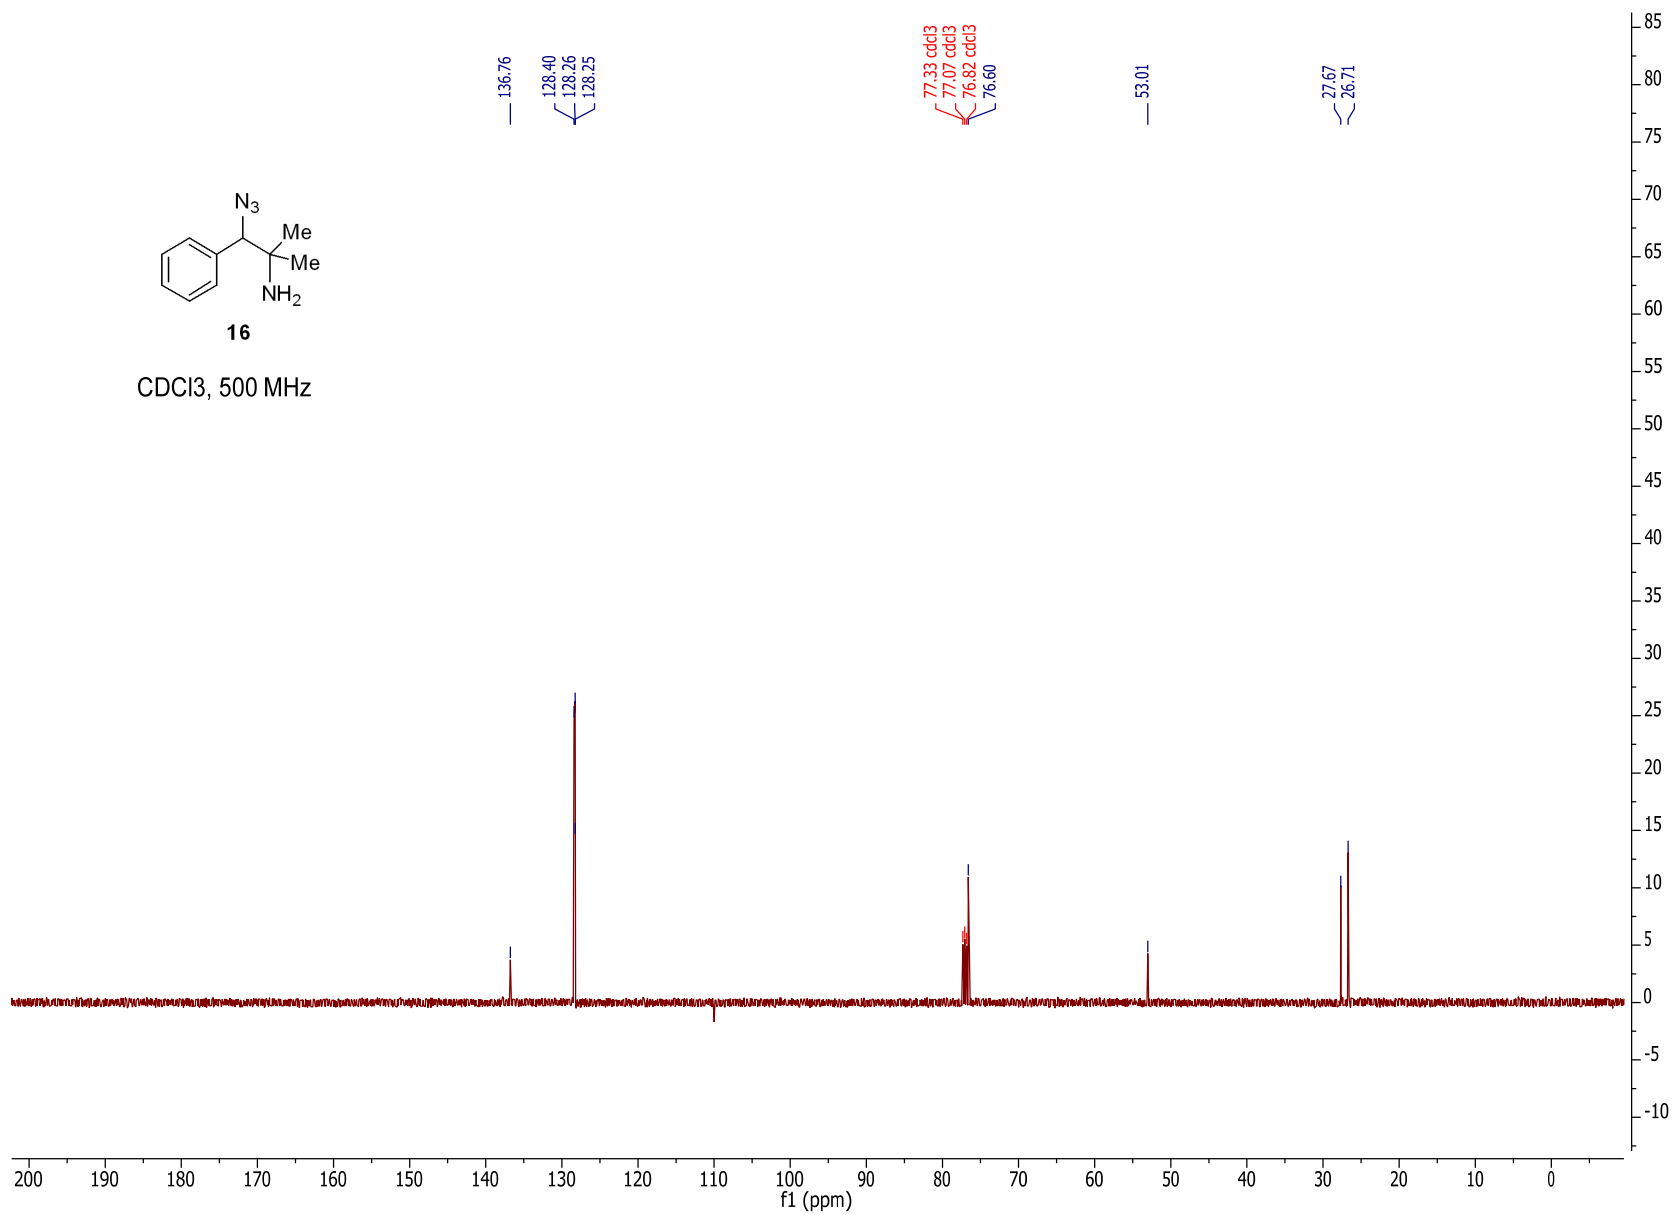

SI-205

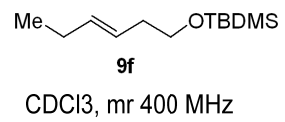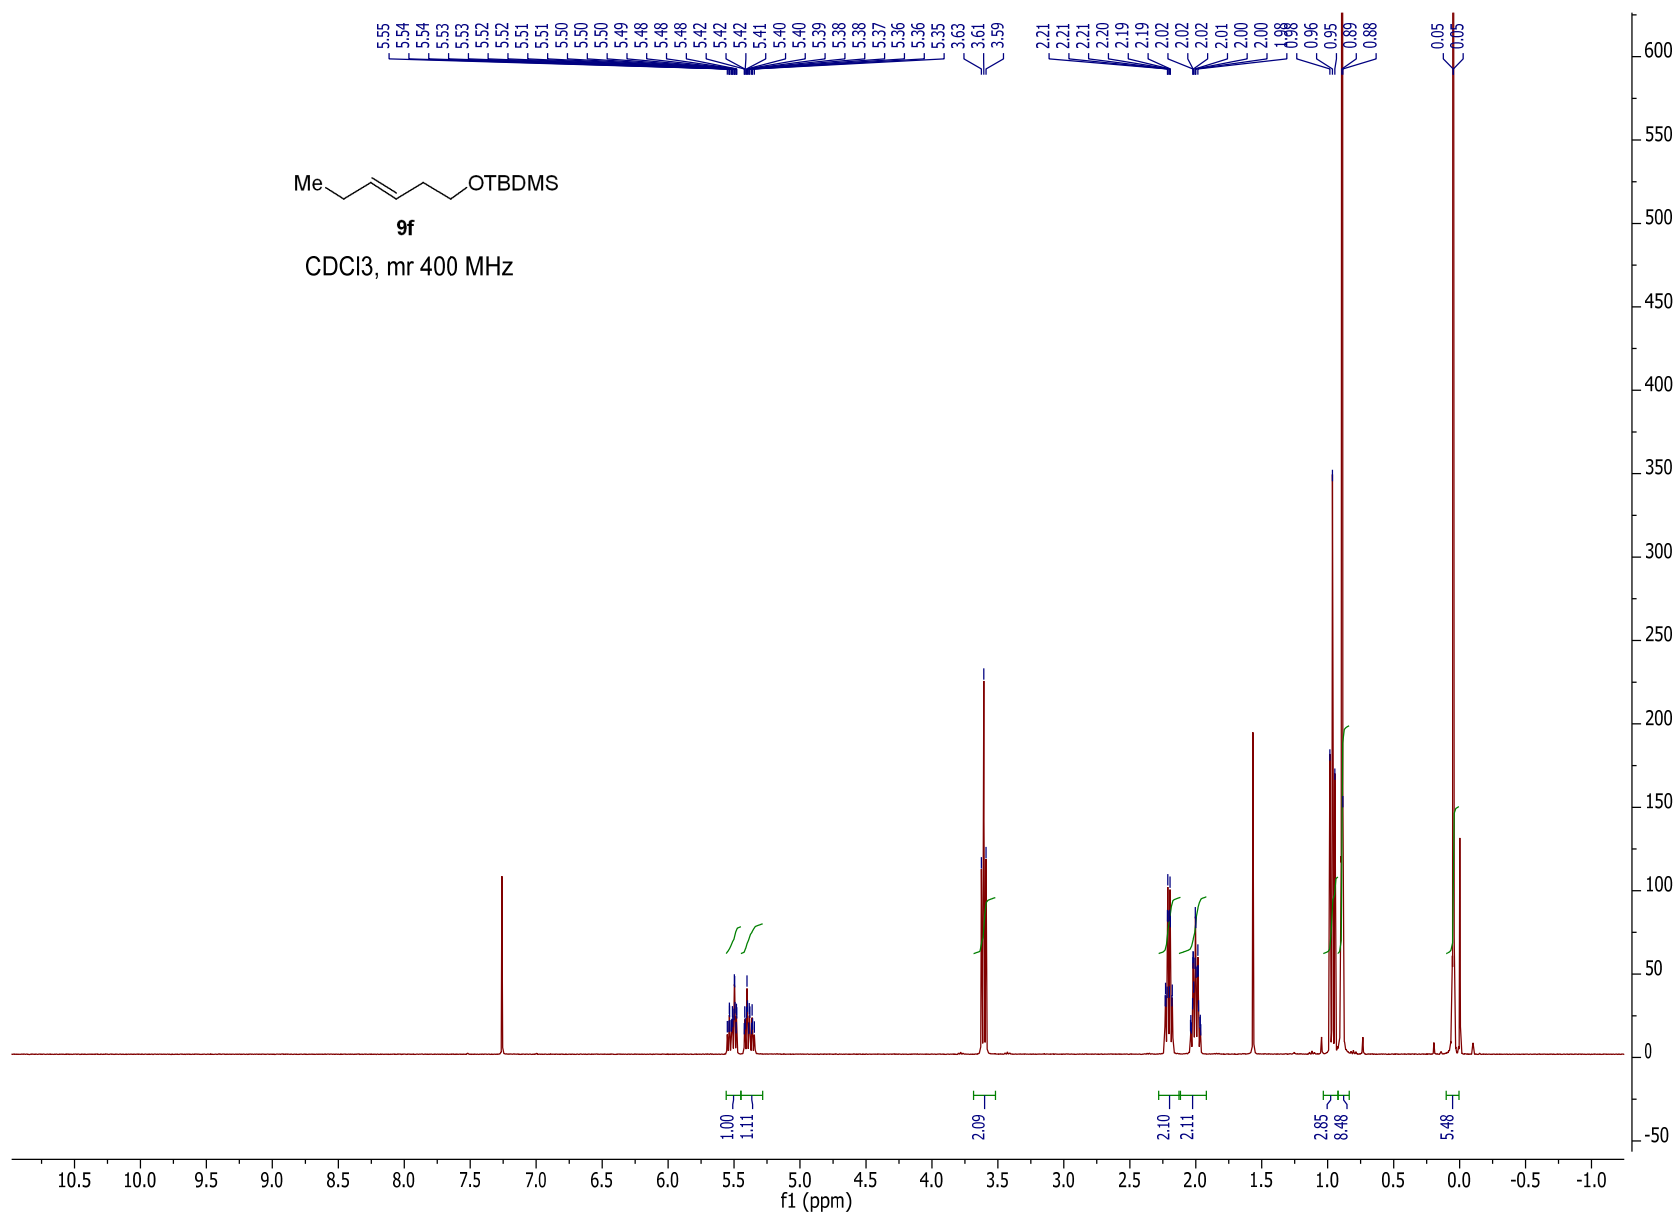

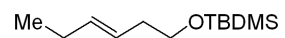

**9f**

CDCl<sub>3</sub>, nr 400 MHz

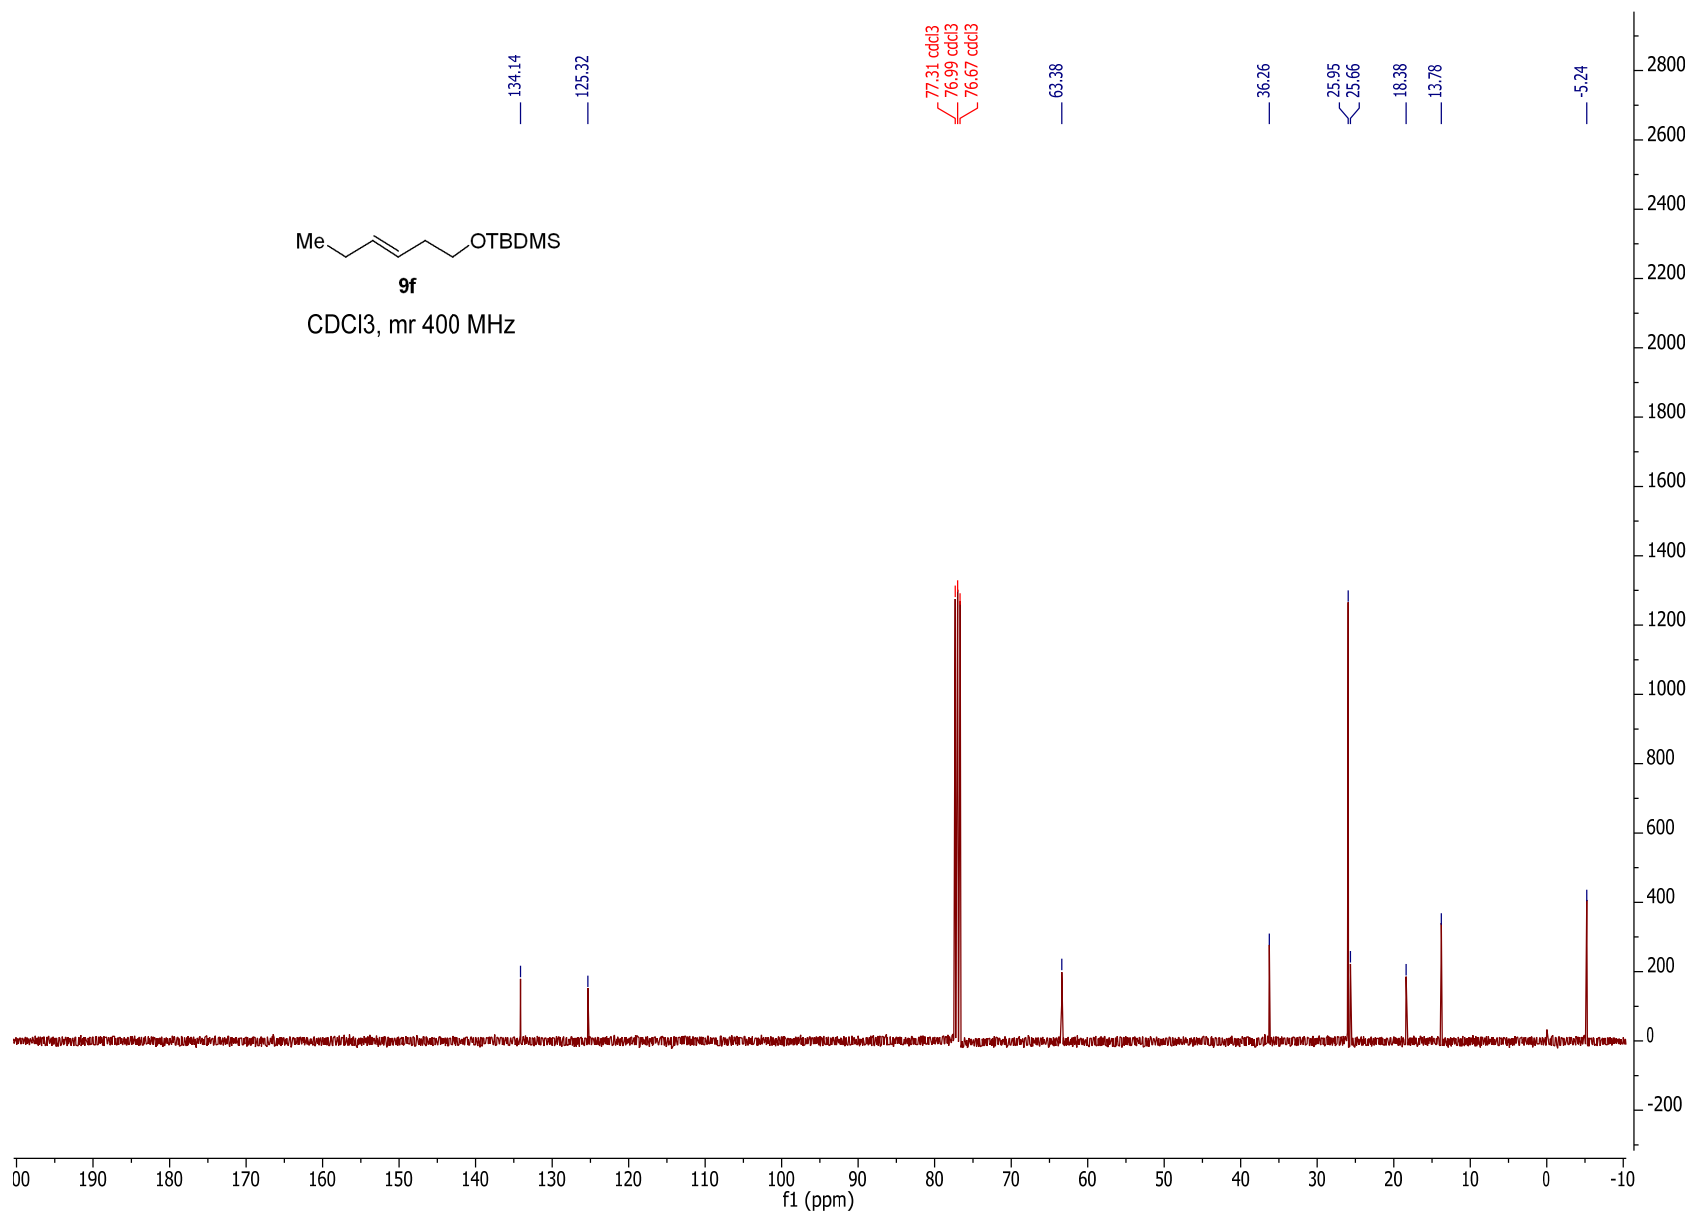

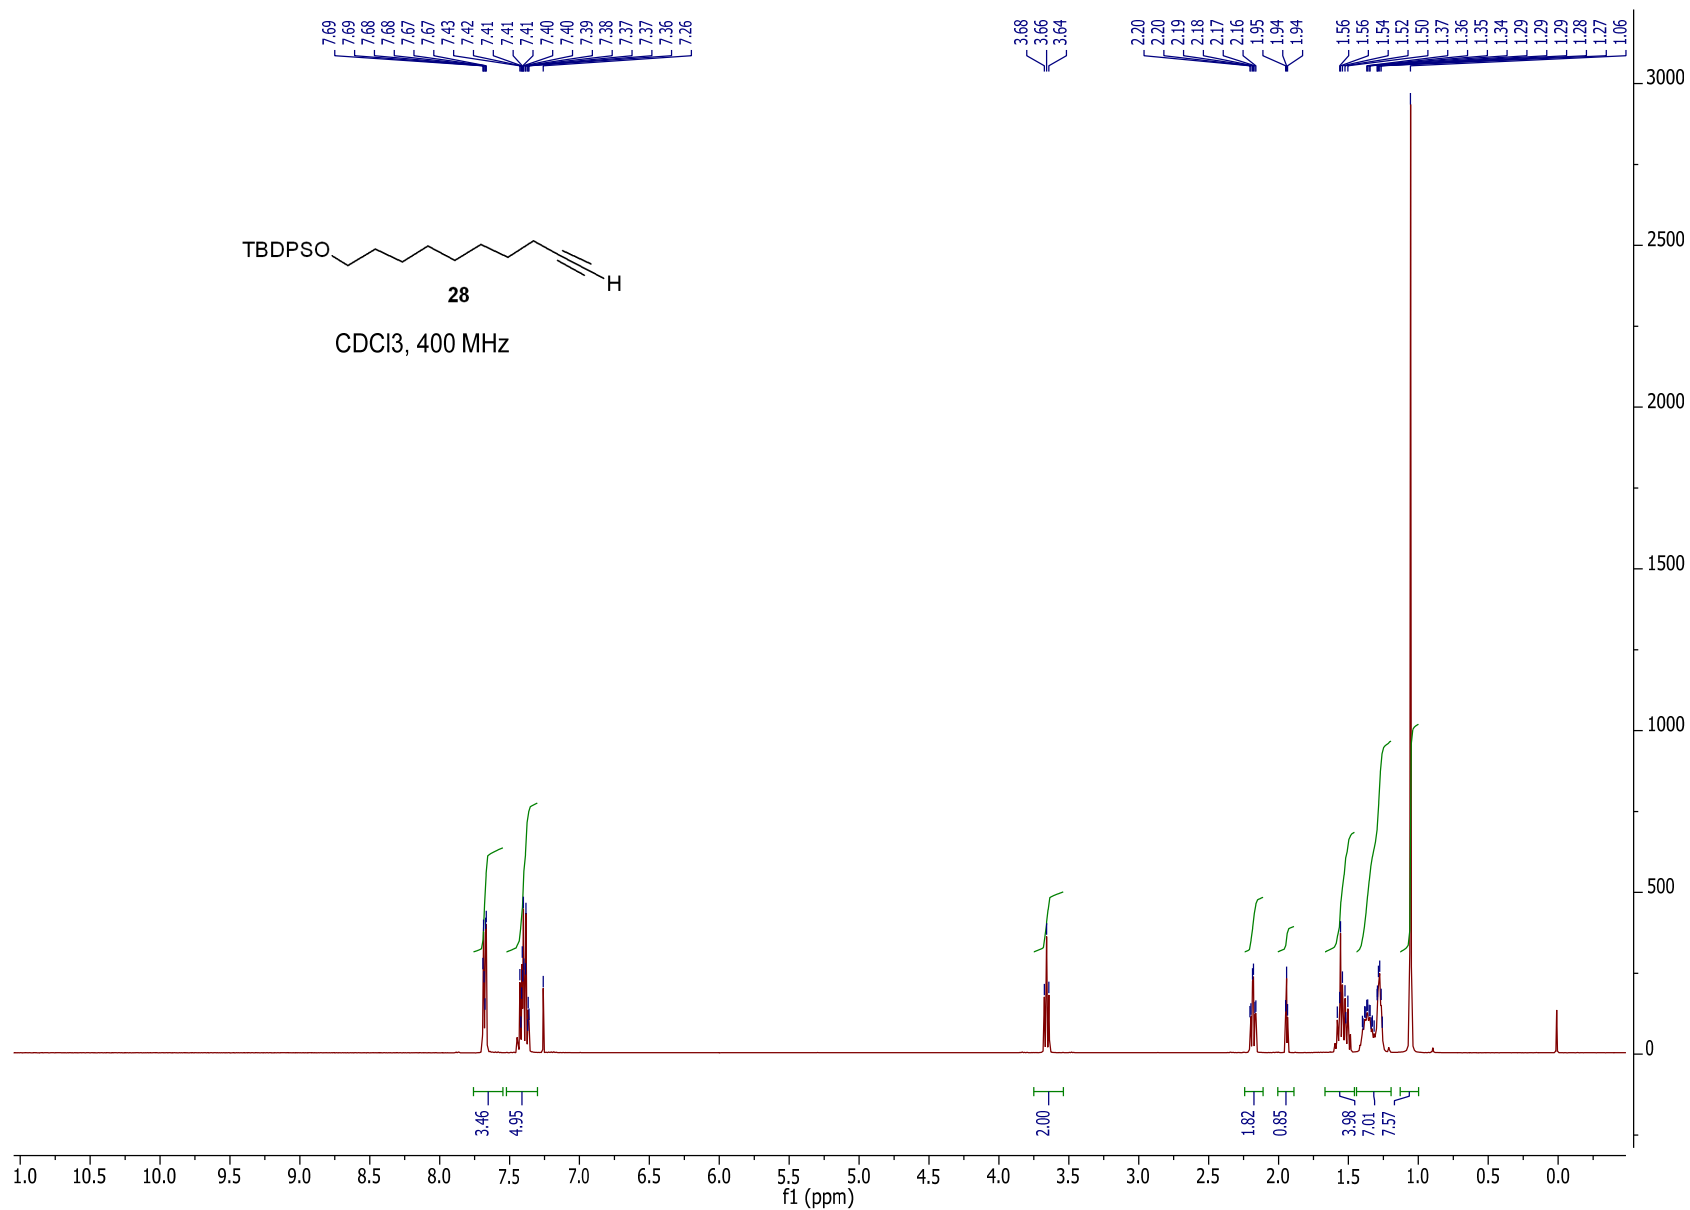

SI-208



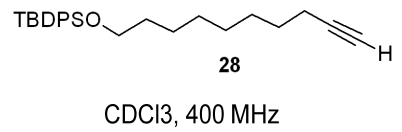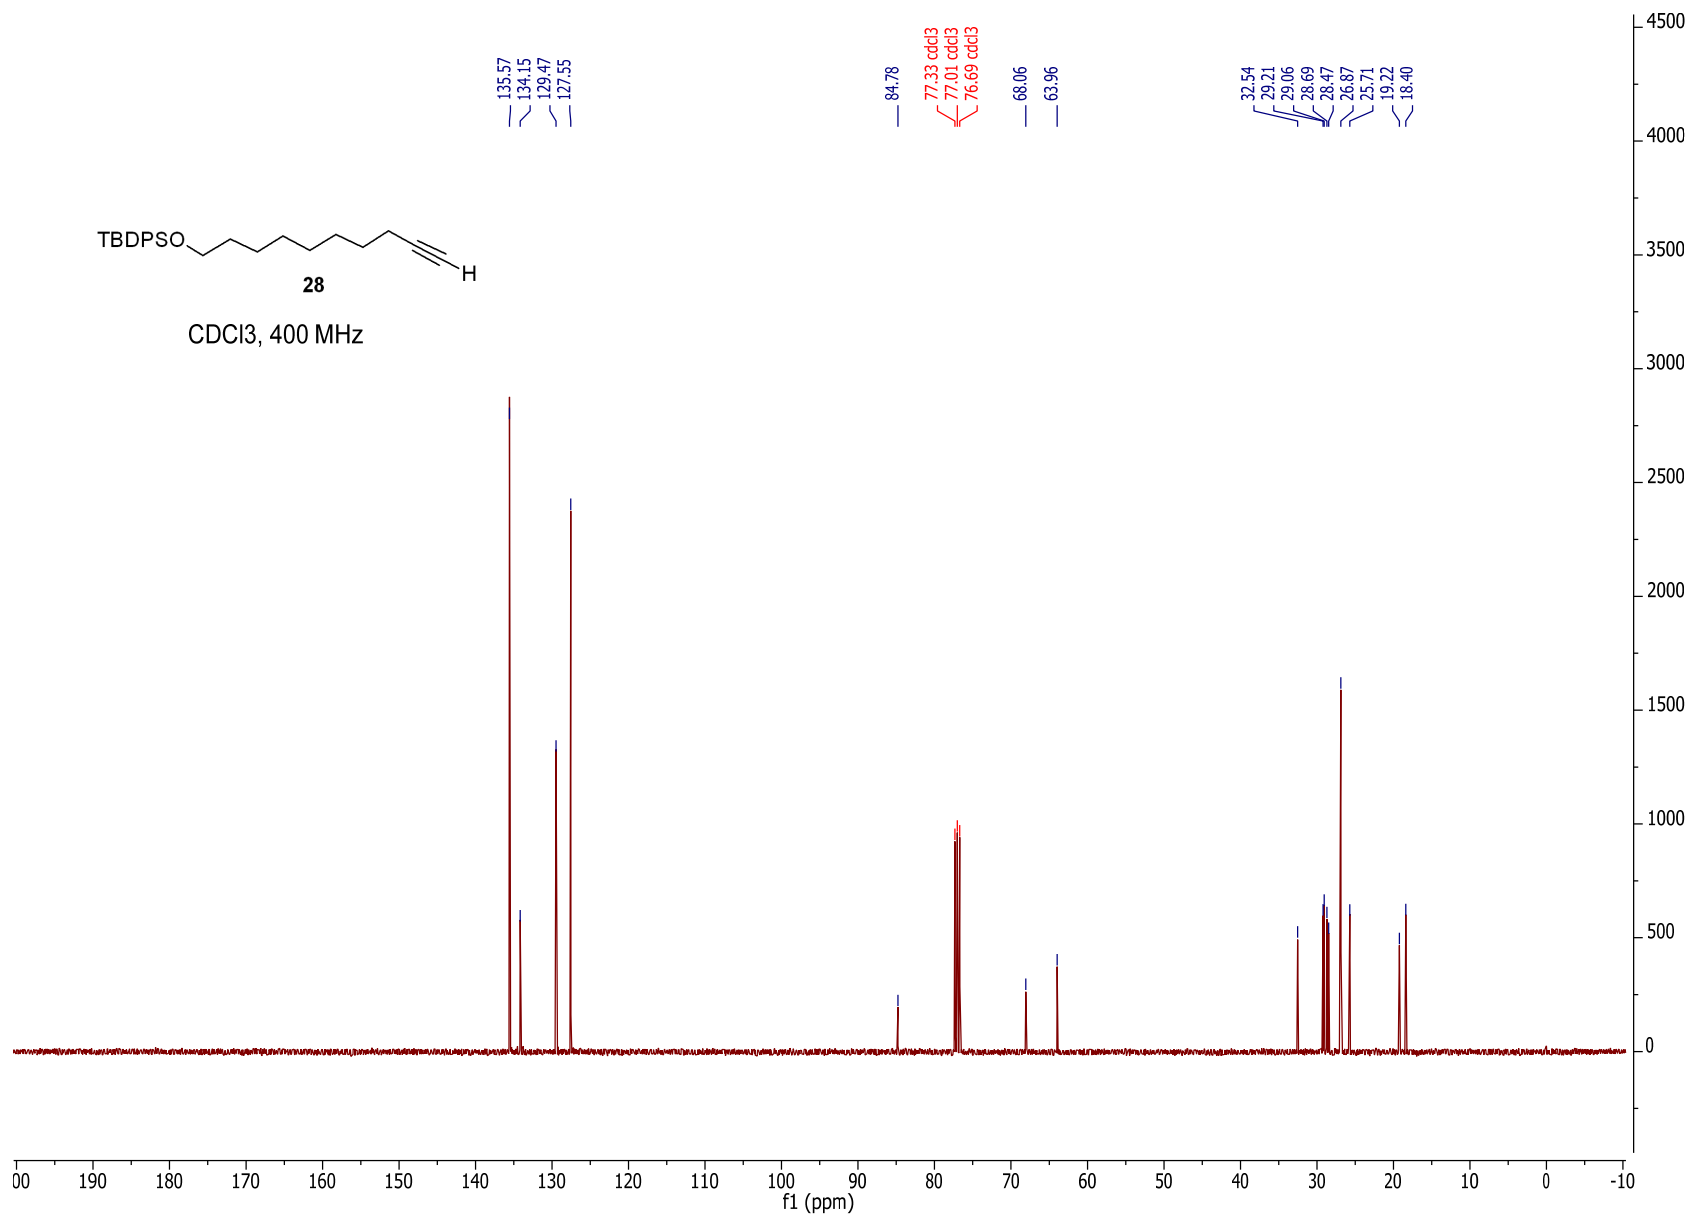

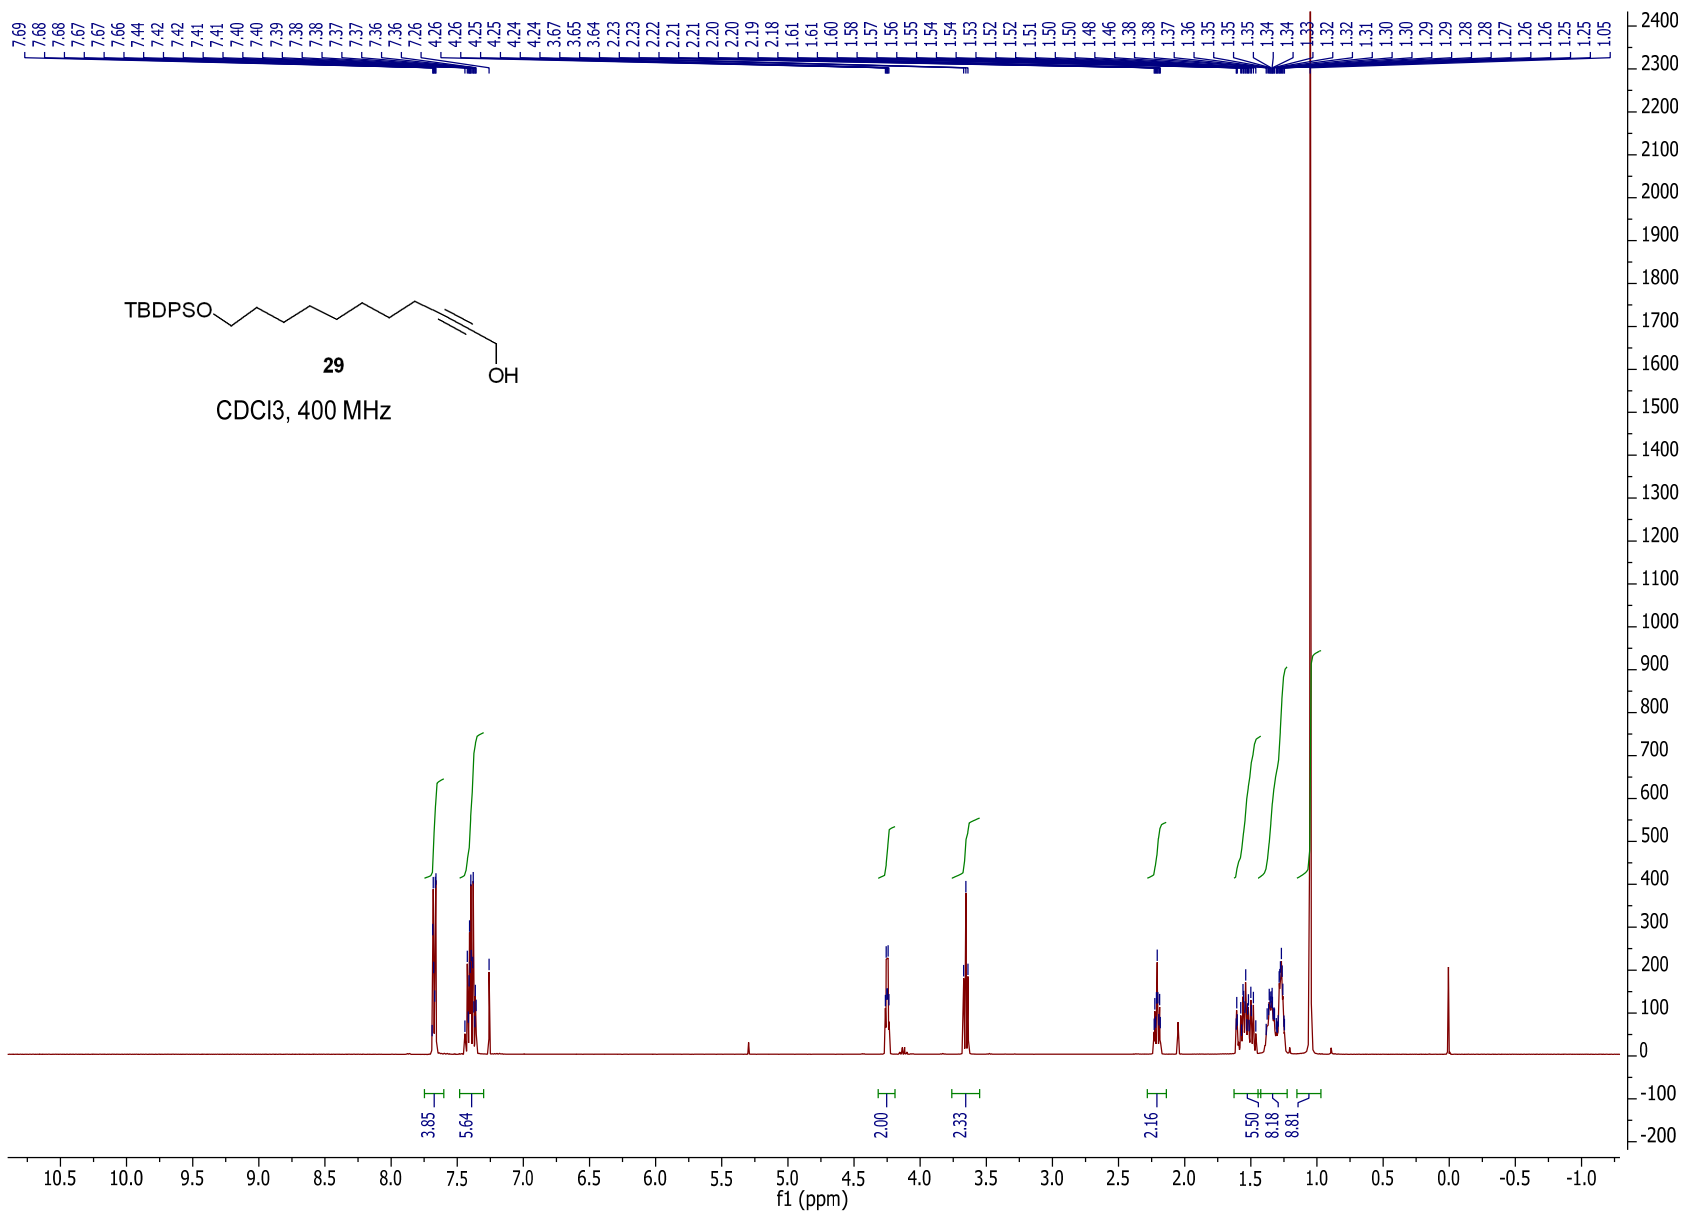

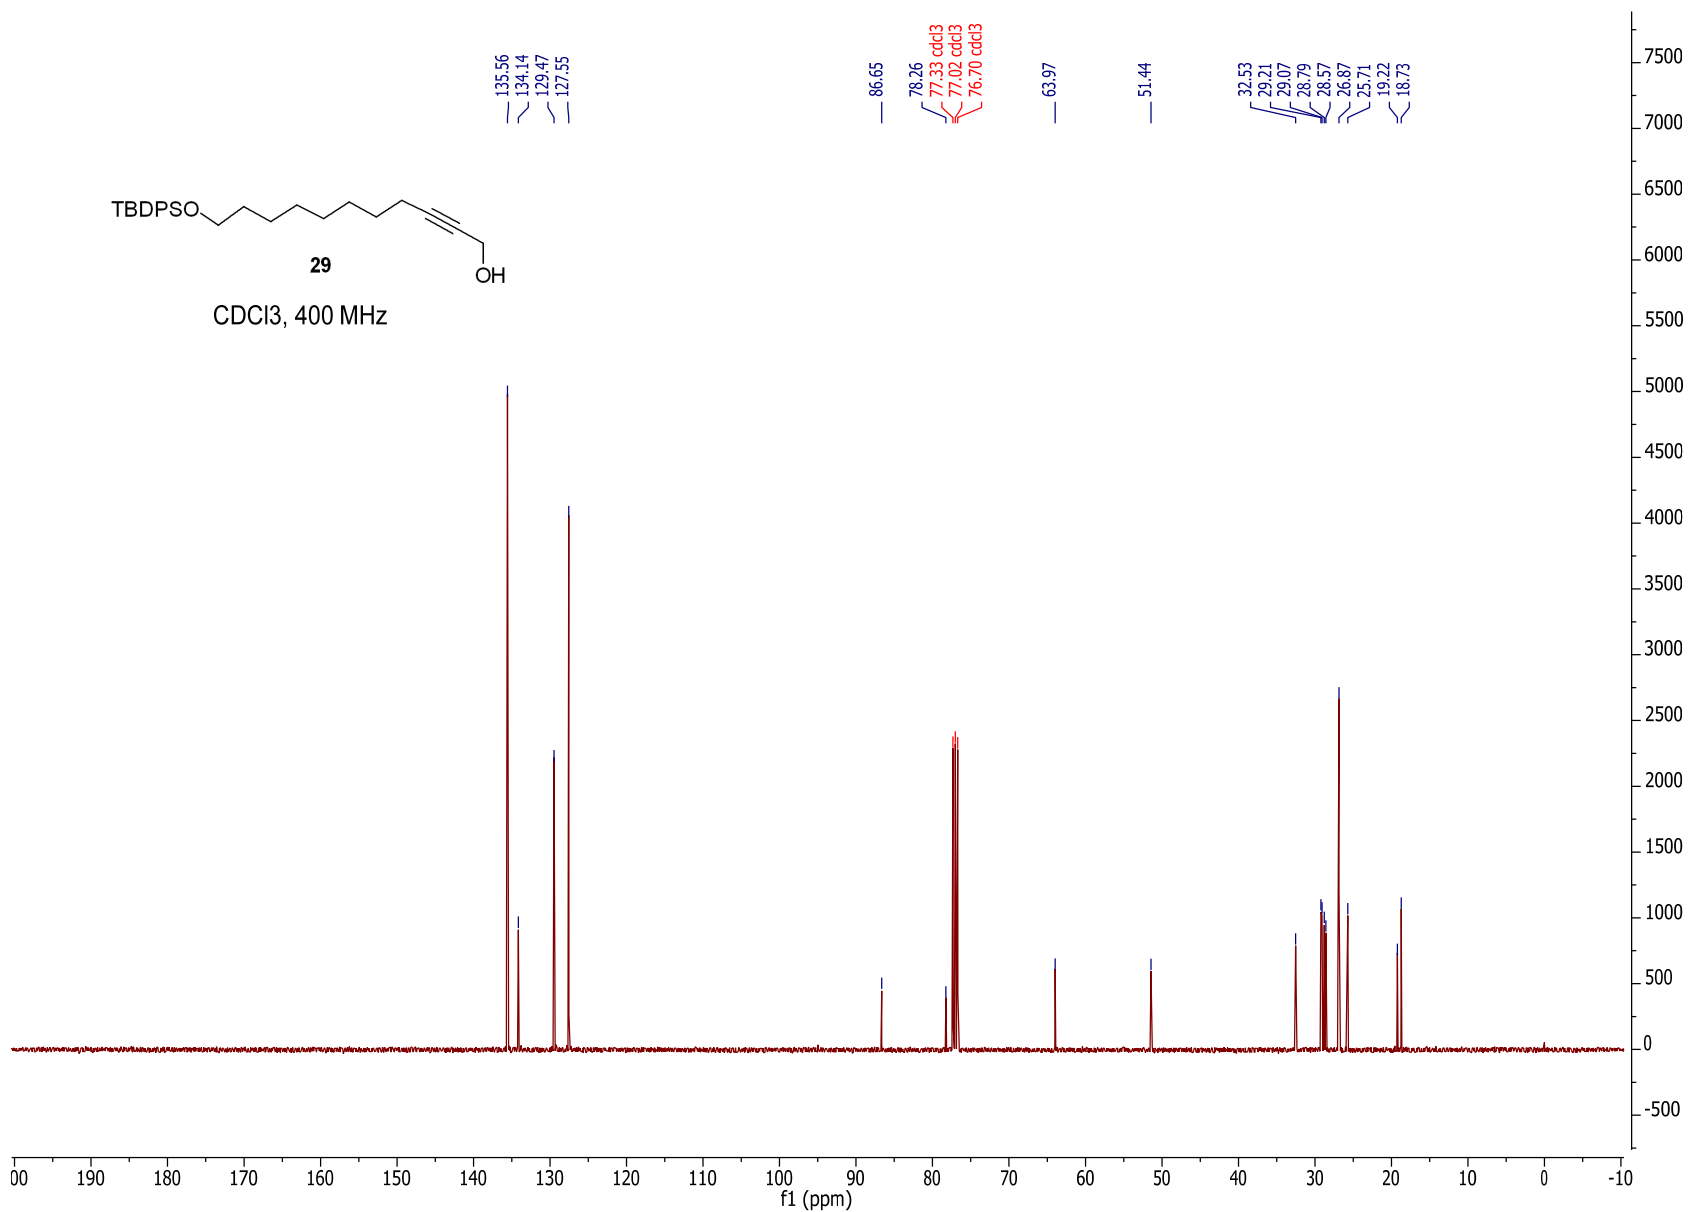

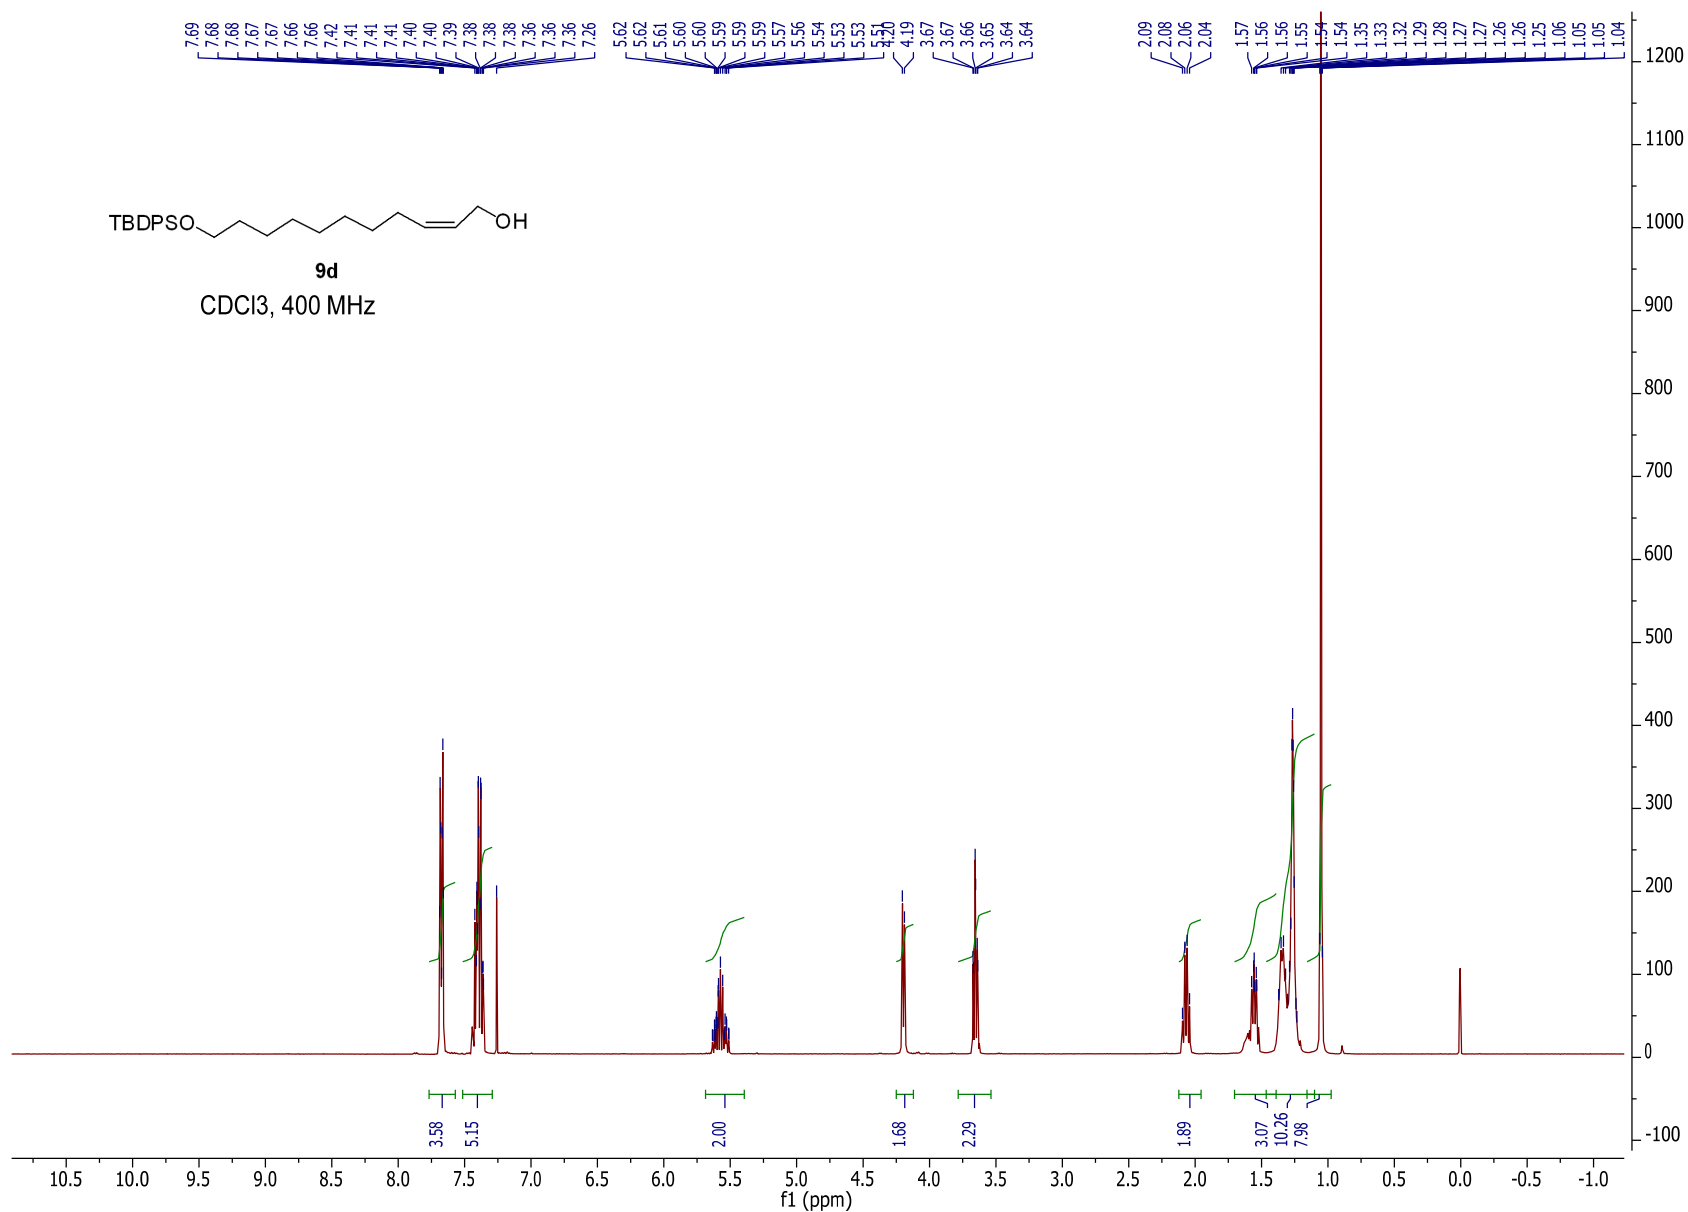

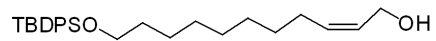

**9d**

CDCl<sub>3</sub>, 400 MHz

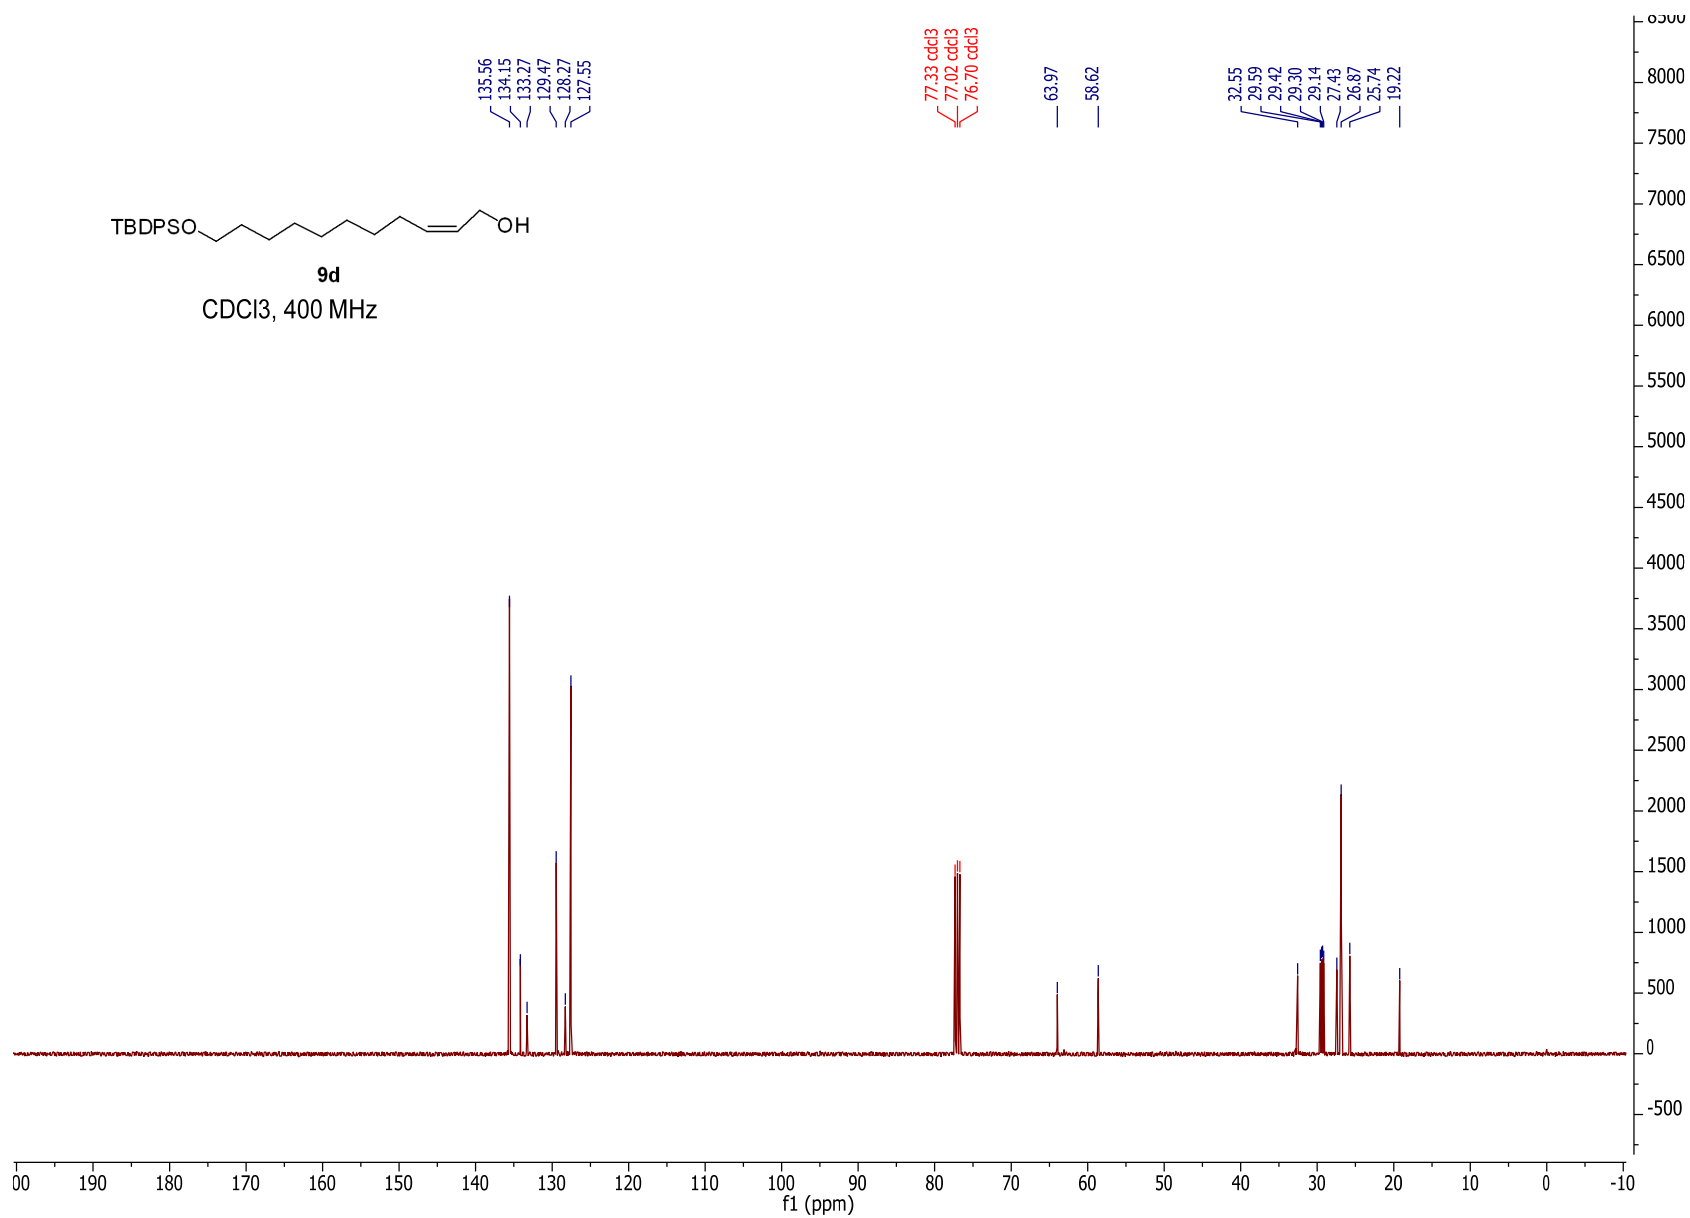

Supplement: NIHMS629277-supplement-experimental.pdf [file NIHMS629277-supplement-experimental.pdf]
